# Supplementary material for: Ancient oysters provide far-field sea-level constraints on ice melt timing and sources during the early–mid Holocene climate transition
Source: Research Square preprint supplement (doi:10.21203/rs.3.rs-8143807/v1), 2025-11-19
Supplement: Supplementary file 1 [file 0a193a5093741121ec6af2a0.xlsx]

## Sheet: Explanation
Category	#	Column heading	Data, interpretation, or comment	Units
A. Identifier/original citation	1	Unique sample ID	Data	n/a
	2	Reference	Data	n/a
B. Fields related to geographic location	3	Region code	Interpretation	n/a
	4	Sub-region	Interpretation	n/a
	5	Latitude	Data	degrees
	6	Longitude	Data	degrees
C. Fields related to horizontal position of RSL	7	Dating method	Data	n/a
	8	Corrected age	Data	14C a BP
	9	Corrected age uncertainty	Data	14C a
	10	Age	Interpretation	cal a BP
	11	Age 2σ Uncertainty +	Interpretation	cal a
	12	Age 2σ Uncertainty -	Interpretation	cal a
D.1 Fields related to stratigraphy from which the sample was obtained	13a	Dated facies	Interpretation	n/a
	13b	Dated material	Interpretation	n/a
	14	Overburden facies (nearest layer)	Interpretation	n/a
	15	Underlying facies (nearest layer)	Interpretation	n/a
	16	Tendency	Interpretation	n/a
	17	Sample depth/Overburden thickness	Data	m
	18	Depth to consolidated substrate	Data	m
	19	Intercalated	Data	yes/no
D.2 Fields related to uncertainties in determining the depth of a sample in a core or section	20	Sampling method	Data	n/a
	21	Sample thickness	Data	m
	22	Sample thickness type	Comment	n/a
	23	Corrected sample thickness	Interpretation	m
	24	Sample thickness uncertainty	Interpretation	m
	25	Sampling uncertainty	Interpretation	m
	26	Core shortening/stretching uncertainty	Interpretation	m
	27	Non-vertical drilling uncertainty	Interpretation	m
D.3 Fields related to uncertainties in determining the absolute elevation of a core or section	28	Tidal uncertainty	Interpretation	m
	29	Water depth uncertainty	Interpretation	m
	30	Leveling uncertainty	Interpretation	m
	31	(d)GPS or RTK uncertainty	Interpretation	m
	32	Benchmark uncertainty	Interpretation	m
	33	Vegetation zone uncertainty	Interpretation	m
	34	Map uncertainty	Interpretation	m
	35	DEM uncertainty	Interpretation	m
	36	Orthometric sample elevation	Data	m
	37	Orthometric datum or MSL epoch	Data	n/a
	38a	Sample elevation	Data	m
	38b	Elevation datum	Comment	n/a
	39	Sample elevation type	Comment	n/a
	40	Sample elevation uncertainty +	Interpretation	m
	41	Sample elevation uncertainty -	Interpretation	m
D.4 Tidal datums	42	MLWS	Interpretation	m
	43	MLWN	Interpretation	m
	44	MLLW	Interpretation	m
	45	MLW	Interpretation	m
	46	MTL	Interpretation	m
	47	MHW	Interpretation	m
	48	MHHW	Interpretation	m
	49	MHWN	Interpretation	m
	50	MHWS	Interpretation	m
	51	HAT	Interpretation	m
D.5 Fields related to uncertainties associate with the sample's indicative meaning	52	Type	Interpretation	n/a
	53	Primary indicator type	Interpretation	n/a
	54	Secondary indicator type	Interpretation	n/a
	55	Supporting evidence	Interpretation	n/a
	56	Sample indicative meaning	Interpretation	n/a
	57	Reference water level	Interpretation	m
	58	Indicative range uncertainty	Interpretation	m
	59	RWL modeling uncertainty	Interpretation	m
	60	IR modeling uncertainty	Interpretation	m
	61	Paleotide-corrected RWL (if any)	Interpretation	m
	62	Paleotide-corrected indicative range (if any)	Interpretation	m
	63	Paleo indicative range change uncertainty (if any)	Interpretation	m
D.6 Fields used to account for effects of sediment compaction and tectonics on sample elevation	64	Compaction correction (if any)	Interpretation	n/a
	65	Compaction correction uncertainty (if any)	Interpretation	n/a
	66	Tectonic correction (if any)	Interpretation	m/ka
	67	Tectonic correction uncertainty (if any)	Interpretation	m/ka
D.7 Fields use to calculate the past position and uncertainty of RSL from each sample	68	RSL 2σ Uncertainty +	Interpretation	m
	69	RSL 2σ Uncertainty +	Interpretation	m
	70	RSL 2σ Uncertainty -	Interpretation	m
	71	Corrected RSL (if any)	Interpretation	m
	72	Corrected RSL uncertainty + (if any)	Interpretation	m
	73	Corrected RSL uncertainty - (if any)	Interpretation	m
	74	Correction type (if any)	Interpretation	n/a
E. Additional notes	75	Reject	Interpretation	n/a
	76	Why rejected?	Comment	n/a
	77	Notes	Comment	n/a

## Sheet: Long-form
A. Identifier/original citation		B. Fields related to geographic location				C. Fields related to horizontal position of RSL						D.1 Fields related to stratigraphy from which the sample was obtained								D.2 Fields related to uncertainties in determining the depth of a sample in a core or section								D.3 Fields related to uncertainties in determining the absolute elevation of a core or section															D.4 Tidal datums
Unique sample ID	Reference	Region code	Sub-region	Latitude	Longitude	Dating method	Corrected age (14C a BP)	Corrected age uncertainty (14C a)	Age (cal a BP)	Age 2σ Uncertainty + (cal a)	Age 2σ Uncertainty - (cal a)	Dated facies	Dated material	Overburden facies (nearest layer)	Underlying facies (nearest layer)	Tendency (Howard check)	Sample depth/ Overburden thickness (m)	Depth to consolidated substrate (m)	Intercalated	Sampling method	Sample thickness (m)	Sample thickness type	Corrected sample thickness (m)	Sample thickness uncertainty (m)	Sampling uncertainty (m)	Core shortening/stretching uncertainty (m)	Non-vertical drilling uncertainty (m)	Tidal uncertainty (m)	Water depth uncertainty (m)	Leveling uncertainty (m)	(d)GPS or RTK uncertainty (m)	Benchmark uncertainty (m)	Vegetation zone uncertainty (m)	Map uncertainty (m)	DEM uncertainty (m)	Orthometric sample elevation (m)	Orthometric datum or MSL epoch	Sample elevation (m)	Elevation datum (m)	Sample elevation type	Sample elevation uncertainty + (m)	Sample elevation uncertainty - (m)	LAT (m)	MLWS (m)	MLWN (m)	MLLW (m)	MLW (m)	MTL (m)	MHW (m)
1	2	3	4	5	6	7	8	9	10	11	12	13a	13b	14	15	16	17	18	19	20	21	22	23	24	25	26	27	28	29	30	31	32	33	34	35	36	37	38a	38b	39	40	41	42		43	45	46	47	48
LFA27	Huang et al. 1986	9a	Hong Kong	22.8879	115.67	1 = Radiocarbon	8720.68	203.035	9192	544	605	Marine mud with plant material	Shell fragments	nd	nd	regressive	24.9	nd	1	drill core	0.1	estimated	0.1	0.05	0.01	0.15	0.498	0	0	0.5	0	0.1	0	0	0	nd	nd	-17.8	YSD	midpoint	0.73014	0.73014	-0.933834	0	0	-0.526149	-0.326149	0.00269426	0.281537
MF-ML	Huang et al. 1986	9a	Hong Kong	22.8258	115.187	1 = Radiocarbon	4370.68	182.614	4333	515	526	Lithified shell ridge	Shell	nd	nd	transgressive	2.82	nd	1	drill core	0.1	estimated	0.1	0.05	0.01	0.15	0.0564	0	0	0.5	0	0.1	0	0	0	nd	nd	3	YSD	midpoint	0.536918	0.536918	-0.9433	0	0	-0.52165	-0.360825	0.0043812	0.3
HDBSS	Huang et al. 1986	9a	Hong Kong	22.7459	114.758	1 = Radiocarbon	1861.28	141.75	1779	342	365	Lagoon peat	Peat	nd	nd	transgressive	4.57	nd	1	drill core	0.1	estimated	0.1	0.05	0.01	0.15	0.0914	0	0	0.5	0	0.1	0	0	0	nd	nd	1.5	YSD	midpoint	0.541714	0.541714	-1.01912	0	0	-0.614484	-0.414484	0.0145748	0.39402
Huang8301	Huang et al. 1983; Huang et al. 1986	9a	Hong Kong	22.45	114.5	1 = Radiocarbon	2560.68	97.7141	2075	311	344	Laminated grey white loose sand dipping towards the sea	Shell	nd	beach sediment	regressive	0	nd	1	hand core	0.1	estimated	0.1	0.05	0.01	0	0	0	0	0.5	0	0.1	0	0	0	nd	nd	1.5	YSD	midpoint	0.512445	0.512445	-1.1048	0	0	-0.652401	-0.402401	0.0243997	0.4
KWG-1056	Huang et al. 1983; Huang et al. 1986	9a	Hong Kong	22.45	114.5	1 = Radiocarbon	3750.68	129.318	3535	404	387	Shelly sand with marine bivalve	Shell	grey silty sand	dark grey fine sand with granule	regressive	5.66	4.62	1	drill core	0.1	estimated	0.1	0.05	0.01	0.15	0.1132	0	0	0.5	0	0.1	0	0	0	nd	nd	-4.4	YSD	midpoint	0.545815	0.545815	-1.1048	0	0	-0.652401	-0.402401	0.0243997	0.4
KWG-1057	Huang et al. 1983; Huang et al. 1986	9a	Hong Kong	22.45	114.5	1 = Radiocarbon	4368.81	172.234	4331	493	499	Dark grey gravelly sandy silt with small amount of peat	Shell	dark grey gravelly silty sand with shell fragment	grey gravels	transgressive	8	nd	1	drill core	0.1	estimated	0.1	0.05	0.01	0.15	0.16	0	0	0.5	0	0.1	0	0	0	nd	nd	-7	YSD	midpoint	0.557405	0.557405	-1.1048	0	0	-0.652401	-0.402401	0.0243997	0.4
KWG-252	Huang et al. 1983; Li et al. 1991; Zong 2004	9a	Hong Kong	22.45	114.5	1 = Radiocarbon	3888.81	148.878	4310	503	407	Grey shelly sandy silt with oyster shell	Bulk organic	dark grey muddy silt with shell fragments	yellowish gravelly sand	transgressive	4.4	nd	1	drill core	0.1	estimated	0.1	0.05	0.01	0.15	0.088	0	0	0.5	0	0.1	0	0	0	nd	nd	-5.6	YSD	midpoint	0.541151	0.541151	-1.1048	0	0	-0.652401	-0.402401	0.0243997	0.4
OxA-5400	Davis 1999; Fyfe et al 1999	9a	Hong Kong	22.1526	114.449	1 = Radiocarbon	2025	65	1441	255	218	grey soft clayey silt with shell fragments	Shell	nd	shelly sand with clay laminae and pockets	transgressive	7.05	>53.2	1	drill core	0.01	estimated	0.01	0.005	0.01	0.15	0.141	0	0	0.5	0	0.1	0	0	0	nd	nd	-35.88	YSD	midpoint	0.550005	0.550005	-1.36205	0	0	-0.644413	-0.384118	0.0853663	0.534998
OxA-5401	Davis 1999; Fyfe et al 1999	9a	Hong Kong	22.1526	114.449	1 = Radiocarbon	3575	60	3314	263	276	grey soft clayey silt with shell fragments	Shell	nd	shelly sand with clay laminae and pockets	transgressive	8.55	>51.7	1	drill core	0.01	estimated	0.01	0.005	0.01	0.15	0.171	0	0	0.5	0	0.1	0	0	0	nd	nd	-37.38	YSD	midpoint	0.55845	0.55845	-1.36205	0	0	-0.644413	-0.384118	0.0853663	0.534998
OxA-5402	Davis 1999; Fyfe et al 1999	9a	Hong Kong	22.1526	114.449	1 = Radiocarbon	4870	75	4983	307	290	grey soft clayey silt with shell fragments	Shell	nd	shelly sand with clay laminae and pockets	transgressive	12.05	>48.2	1	drill core	0.01	estimated	0.01	0.005	0.01	0.15	0.241	0	0	0.5	0	0.1	0	0	0	nd	nd	-40.88	YSD	midpoint	0.5837	0.5837	-1.36205	0	0	-0.644413	-0.384118	0.0853663	0.534998
Owen98A	Owen et al 1998	9a	Hong Kong	22.218	114.382	1 = Radiocarbon	4520.68	441.719	4513	1069	1119	homogeneous diatomaceous mud	Shell	homogeneous diatomaceous mud	shelly sand	transgressive	5.6	>75	1	drill core	0.01	estimated	0.01	0.005	0.01	0.15	0.112	0	0	0.5	0	0.1	0	0	0	nd	nd	-36.58	YSD	midpoint	0.543295	0.543295	-1.37592	0	0	-0.641471	-0.383278	0.0898834	0.542141
KWG-286	Yim 1984	9a	Hong Kong	22.3623	114.374	1 = Radiocarbon	5913.95	182.308	6750	415	435	yellowish-grey medium to fine sand with shell fragments	wood	disturbed soil with gravels, cobbles, boulder and shells	fine sand with cobbles	transgressive	6.08	19.95	1	drill core	0.1	estimated	0.1	0.05	0.01	0.15	0.1216	0	0	0.5	0	0.1	0	0	0	nd	nd	-12.88	YSD	midpoint	0.547619	0.547619	-1.21954	0	0	-0.723908	-0.471724	-0.0239079	0.423908
HAR-868	Kendall 1976	9a	Hong Kong	22.3739	114.34	1 = Radiocarbon	6595.45	104.098	7486	178	174	clay with lense of sand and silt	wood	blue grey marine clay	sandy gravel	transgressive	12.63	9.87	1	excavation	0.1	estimated	0.1	0.05	0.01	0.15	0.2526	0	0	0.5	0	0.1	0	0	0	nd	nd	-17.01	YSD	midpoint	0.590683	0.590683	-1.18233	0	0	-0.716466	-0.449399	-0.0164665	0.416466
HAR-869	Kendall 1976	9a	Hong Kong	22.3739	114.34	1 = Radiocarbon	7760.64	142.956	8580	417	252	clay with lense of sand and silt	wood	blue grey marine clay	sandy gravel	transgressive	14.03	8.97	1	excavation	0.1	estimated	0.1	0.05	0.01	0.15	0.2806	0	0	0.5	0	0.1	0	0	0	nd	nd	-17.91	YSD	midpoint	0.603188	0.603188	-1.18233	0	0	-0.716466	-0.449399	-0.0164665	0.416466
HAR-870	Kendall 1976	9a	Hong Kong	22.3739	114.34	1 = Radiocarbon	8180.68	448.013	8574	1049	1015	clay with lense of sand and silt	Shell	blue grey marine clay	sandy gravel	transgressive	12.63	9.87	1	excavation	0.1	estimated	0.1	0.05	0.01	0.15	0.2526	0	0	0.5	0	0.1	0	0	0	nd	nd	-17.01	YSD	midpoint	0.590683	0.590683	-1.18233	0	0	-0.716466	-0.449399	-0.0164665	0.416466
HAR-871	Kendall 1976	9a	Hong Kong	22.3739	114.34	1 = Radiocarbon	8289.76	432.192	8696	1033	1014	clay with lense of sand and silt	Shell	blue grey marine clay	sandy gravel	transgressive	14.43	8.57	1	excavation	0.1	estimated	0.1	0.05	0.01	0.15	0.2886	0	0	0.5	0	0.1	0	0	0	nd	nd	-18.31	YSD	midpoint	0.606951	0.606951	-1.18233	0	0	-0.716466	-0.449399	-0.0164665	0.416466
CS-619	Strange and Shaw 1986; Yim 1999	9a	Hong Kong	22.301	114.26	1 = Radiocarbon	8470.68	457.729	8906	1178	1044	shelly silty dark blue grey to greenish grey clay	Shell	shelly silty dark blue grey to greenish grey clay	light blue grey silty clay with yellow ochre streaks and mottles, interbedded sand layers, scatter black plant fragments	transgressive	11.6	20.1	1	drill core	0.01	estimated	0.01	0.005	0.19	0.15	0.232	0	0	0.5	0	0.1	0	0	0	nd	nd	-19.7	YSD	midpoint	0.610286	0.610286	-1.2429	0	0	-0.695073	-0.444347	0.0234056	0.47884
ANU-76214	Yu et al. 2025	9a	Hong Kong	22.2456	114.246	1 = Radiocarbon	4217	33	4135	258	251	relic oyster band	Shell	nd	nd	nd	nd	nd	0	outcrop	0.01	estimated	0.01	0.005	0.01	0.15	0	0	0	0.03	0	0.1	0	0	0	nd	nd	2.727	YSD	midpoint	0.183098	0.183098	-1.32737	0	0	-0.661235	-0.411235	0.0706868	0.516453
ANU-76216	Yu et al. 2025	9a	Hong Kong	22.2456	114.246	1 = Radiocarbon	3827	27	3621	235	230	relic oyster band	Shell	nd	nd	nd	nd	nd	0	outcrop	0.01	estimated	0.01	0.005	0.01	0.15	0	0	0	0.03	0	0.1	0	0	0	nd	nd	2.344	YSD	midpoint	0.183098	0.183098	-1.32737	0	0	-0.661235	-0.411235	0.0706868	0.516453
YASIC-66120.1.1	Yu et al. 2025	9a	Hong Kong	22.2456	114.246	1 = Radiocarbon	3489	19	3214	217	235	relic oyster band	Shell	nd	nd	nd	nd	nd	0	outcrop	0.01	estimated	0.01	0.005	0.01	0.15	0	0	0	0.03	0	0.1	0	0	0	nd	nd	2.076	YSD	midpoint	0.183098	0.183098	-1.32737	0	0	-0.661235	-0.411235	0.0706868	0.516453
YASIC-66121.1.1	Yu et al. 2025	9a	Hong Kong	22.2456	114.246	1 = Radiocarbon	4960	21	5090	216	242	relic oyster band	Shell	nd	nd	nd	nd	nd	0	outcrop	0.01	estimated	0.01	0.005	0.01	0.15	0	0	0	0.03	0	0.1	0	0	0	nd	nd	2.293	YSD	midpoint	0.183098	0.183098	-1.32737	0	0	-0.661235	-0.411235	0.0706868	0.516453
YASIC-66122.1.1	Yu et al. 2025	9a	Hong Kong	22.2456	114.246	1 = Radiocarbon	4975	23	5108	211	257	relic oyster band	Shell	nd	nd	nd	nd	nd	0	outcrop	0.01	estimated	0.01	0.005	0.01	0.15	0	0	0	0.03	0	0.1	0	0	0	nd	nd	2.365	YSD	midpoint	0.183098	0.183098	-1.32737	0	0	-0.661235	-0.411235	0.0706868	0.516453
YASIC-66123.1.1	Yu et al. 2025	9a	Hong Kong	22.2456	114.246	1 = Radiocarbon	5110	24	5277	230	259	relic oyster band	Shell	nd	nd	nd	nd	nd	0	outcrop	0.01	estimated	0.01	0.005	0.01	0.15	0	0	0	0.03	0	0.1	0	0	0	nd	nd	2.831	YSD	midpoint	0.183098	0.183098	-1.32737	0	0	-0.661235	-0.411235	0.0706868	0.516453
Beta-145816	Davis et al 2000	9a	Hong Kong	22.2456	114.246	1 = Radiocarbon	5140	50	5313	242	272	relic oyster band	Shell	nd	nd	nd	nd	nd	0	outcrop	0.01	estimated	0.01	0.005	1.1361	0.15	0	0	0	0.5	0	0.1	0	0	0	nd	nd	2.8	YSD	midpoint	1.25429	1.25429	-1.32737	0	0	-0.661235	-0.411235	0.0706868	0.516453
GF9379	Lai and Shaw 1996	9a	Hong Kong	22.4642	114.208	1 = Radiocarbon	626.47	121.279	605	186	275	Mud with peat material	marine mud	nd	nd	nd	nd	nd	1	drill core	0.05	estimated	0.05	0.025	0.01	0.15	0.2	0	0	0.5	0	0.1	0	0	0	nd	nd	-1.38	YSD	midpoint	0.568529	0.568529	-1.36954	0	0	-0.755913	-0.552506	0.0264781	0.577057
GF9380	Lai and Shaw 1996	9a	Hong Kong	22.4642	114.208	1 = Radiocarbon	1000.68	441.719	523	702	522	Mud with peat material	Shell	nd	nd	nd	nd	nd	1	drill core	0.01	estimated	0.01	0.005	0.01	0.15	0.2	0	0	0.5	0	0.1	0	0	0	nd	nd	-1.38	YSD	midpoint	0.568001	0.568001	-1.36954	0	0	-0.755913	-0.552506	0.0264781	0.577057
I-8830	Bard 1975	9a	Hong Kong	22.217	114.202	1 = Radiocarbon	5388.95	111.371	6161	232	231	muddy deposit with clay and boulders	tree log	clay with concretion	dicomposed volcanic rock	transgressive	0.46	nd	1	excavation	0.1	estimated	0.1	0.05	0.01	0.15	0.0092	0	0	0.5	0	0.1	0	0	0	nd	nd	0.32	YSD	midpoint	0.534027	0.534027	-1.25694	0	0	-0.697003	-0.461988	0.0317433	0.482967
GIF-4813	Meacham 1980	9a	Hong Kong	22.3193	114.169	1 = Radiocarbon	7411	467.135	7727	1059	1042	grey marine mud	Shell	nd	nd	nd	nd	nd	1	excavation	0.01	estimated	0.01	0.005	0.01	0.15	0.2	0	0	0.5	0	0.1	0	0	0	nd	nd	-11.88	YSD	midpoint	0.568001	0.568001	-1.39405	0	0	-0.694053	-0.502158	0.0404076	0.551894
GIF-4558	Meacham 1979a	9a	Hong Kong	22.3251	114.168	1 = Radiocarbon	6970.68	457.729	7257	959	989	mud	Shell	nd	nd	nd	nd	nd	1	excavation	0.01	estimated	0.01	0.005	0.01	0.15	0.2	0	0	0.5	0	0.1	0	0	0	nd	nd	-11.88	YSD	midpoint	0.568001	0.568001	-1.40084	0	0	-0.700843	-0.514396	0.0315746	0.54238
OxA-5406	Davis 1999; Fyfe et al 1999	9a	Hong Kong	22.1628	114.165	1 = Radiocarbon	825	65	296	201	239	grey soft clayey silt with shell fragments	Shell	nd	shelly gravel with clayey silt matrix	transgressive	0	>60	1	drill core	0.01	estimated	0.01	0.005	0.01	0.15	0	0	0	0.5	0	0.1	0	0	0	nd	nd	-23.68	YSD	midpoint	0.531625	0.531625	-1.2	0	0	-0.7	-0.426193	0.00119275	0.378578
OxA-5407	Davis 1999; Fyfe et al 1999	9a	Hong Kong	22.1628	114.165	1 = Radiocarbon	3935	65	3760	295	284	grey soft clayey silt with shell fragments	Shell	nd	shelly gravel with clayey silt matrix	transgressive	2.7	>57.2	1	drill core	0.01	estimated	0.01	0.005	0.01	0.15	0.054	0	0	0.5	0	0.1	0	0	0	nd	nd	-26.38	YSD	midpoint	0.53436	0.53436	-1.2	0	0	-0.7	-0.426193	0.00119275	0.378578
OxA-5408	Davis 1999; Fyfe et al 1999	9a	Hong Kong	22.1628	114.165	1 = Radiocarbon	5425	85	5621	270	280	grey soft clayey silt with shell fragments	Shell	nd	shelly gravel with clayey silt matrix	transgressive	4.2	>55.7	1	drill core	0.01	estimated	0.01	0.005	0.01	0.15	0.084	0	0	0.5	0	0.1	0	0	0	nd	nd	-27.88	YSD	midpoint	0.53822	0.53822	-1.2	0	0	-0.7	-0.426193	0.00119275	0.378578
OxA-5409	Davis 1999; Fyfe et al 1999	9a	Hong Kong	22.1628	114.165	1 = Radiocarbon	8920	90	9438	331	327	Shell gravel with clayey silt matrix	Shell	grey soft clayey silt with shell fragments	grey soft clayey silt with fine sand laminae and shell fragments	transgressive	7.2	>52.7	1	drill core	0.01	estimated	0.01	0.005	0.01	0.15	0.144	0	0	0.5	0	0.1	0	0	0	nd	nd	-30.88	YSD	midpoint	0.550782	0.550782	-1.2	0	0	-0.7	-0.426193	0.00119275	0.378578
OxA-5410	Davis 1999; Fyfe et al 1999	9a	Hong Kong	22.1628	114.165	1 = Radiocarbon	9310	80	9941	286	351	grey soft clayey silt with fine sand laminae and shell fragments	Shell	Shell gravel with clayey silt matrix	Fine sand with interbedded clayey silt, with plant and shell fragment and complete bivalve shell; Foraminifera (Ammonia spp., Elphidium spp.); Diatom Pinnulariar spp.	transgressive	11.2	>48.7	1	drill core	0.01	estimated	0.01	0.005	0.01	0.15	0.224	0	0	0.5	0	0.1	0	0	0	nd	nd	-34.88	YSD	midpoint	0.576889	0.576889	-1.2	0	0	-0.7	-0.426193	0.00119275	0.378578
GIF-4387	Meacham 1979a	9a	Hong Kong	22.2796	114.165	1 = Radiocarbon	6453.95	135.198	7355	227	336	mud	wood	nd	nd	nd	nd	nd	1	excavation	0.1	estimated	0.1	0.05	0.01	0.15	0.2	0	0	0.5	0	0.1	0	0	0	nd	nd	-8.18	YSD	midpoint	0.570175	0.570175	-1.33588	0	0	-0.692849	-0.478606	0.0410906	0.528665
KWG-406	Howat 1985	9a	Hong Kong	22.286	114.151	1 = Radiocarbon	8465.53	288.21	9452	747	800	soils with cobbles and boulders in turbulent and near-linear flow pattern, and vortex cylinder structure, also with shell at the bottom	Peat	grey silty sand rich in shell debris	residual soil and granite saprolite	transgressive	18.5	0	0	excavation	0.1	estimated	0.1	0.05	0.01	0.15	0.37	0	0	0.5	0	0.1	0	0	0	nd	nd	-17.38	YSD	midpoint	0.649615	0.649615	-1.34508	0	0	-0.692364	-0.480543	0.0421806	0.533994
KWG-407	Howat 1985	9a	Hong Kong	22.286	114.151	1 = Radiocarbon	8533.95	270.306	9550	690	770	soils with cobbles and boulders in turbulent and near-linear flow pattern, and vortex cylinder structure, also with shell at the bottom	tree log	grey silty sand rich in shell debris	residual soil and granite saprolite	transgressive	18.5	0	0	excavation	0.1	estimated	0.1	0.05	0.01	0.15	0.37	0	0	0.5	0	0.1	0	0	0	nd	nd	-17.38	YSD	midpoint	0.649615	0.649615	-1.34508	0	0	-0.692364	-0.480543	0.0421806	0.533994
I-8269	Meacham 1975	9a	Hong Kong	22.337	114.147	1 = Radiocarbon	8718.95	128.302	9766	401	238	clayey silty sand with fine gravels	tree log	silty sand with gravel and shell	dicomposed grainite	transgressive	15.1	1.1	1	drill core	0.1	estimated	0.1	0.05	0.01	0.15	0.302	0	0	0.5	0	0.1	0	0	0	nd	nd	-14.98	YSD	midpoint	0.613436	0.613436	-1.43039	0	0	-0.73039	-0.580878	-0.0118231	0.494366
GIF-5243	Meacham1982	9a	Hong Kong	22.337	114.147	1 = Radiocarbon	8360.68	463.805	8781	1142	1080	silty clayey sand with organic matter	shell	nd	nd	transgressive	nd	nd	1	drill core	0.1	estimated	0.1	0.05	0.01	0.15	0.2	0	0	0.5	0	0.1	0	0	0	nd	nd	-17.88	YSD	midpoint	0.570175	0.570175	-1.43039	0	0	-0.73039	-0.580878	-0.0118231	0.494366
I-10059	Meacham 1978	9a	Hong Kong	22.1922	114.138	1 = Radiocarbon	5910.68	452.455	6140	1029	1026	shelly grey clay with coarse sand	shell	grey clay with shell, wood and plant fragments	nd	transgressive	4	nd	1	drill core	0.1	estimated	0.1	0.05	0.8	0.15	0.08	0	0	0.5	0	0.1	0	0	0	nd	nd	-2.28	YSD	midpoint	0.965091	0.965091	-1.2	0	0	-0.7	-0.422928	-0.00207168	0.368785
HAR-3586	Meacham 1980	9a	Hong Kong	22.1922	114.138	1 = Radiocarbon	3750.68	446.112	3553	1160	1129	grey clay with shell, wood and plant fragments	shell	brown clay with sand, rootlets and wood fragments	shelly grey clay with coarse sand		1.4	nd	1	drill core	0.1	estimated	0.1	0.05	0.4	0.15	0.028	0	0	0.5	0	0.1	0	0	0	nd	nd	0.22	YSD	midpoint	0.667671	0.667671	-1.2	0	0	-0.7	-0.422928	-0.00207168	0.368785
Si86-123	Langford 1989	9a	Hong Kong	22.5029	114.083	1 = Radiocarbon	5440.36	157.388	6215	405	315	Mud with peat material	rootlet	nd	nd	nd	nd	nd	1	drill core	0.1	estimated	0.1	0.05	0.01	0.15	0.2	0	0	0.03	0	0.1	0	0	0	nd	nd	-0.48	YSD	midpoint	0.275681	0.275681	-1.48306	0	0	-0.947835	-0.71545	0.00159171	0.693633
SI86-124	Langford 1989	9a	Hong Kong	22.5029	114.083	1 = Radiocarbon	5058.36	132.838	5803	377	317	Mud with peat material	rootlet	nd	nd	nd	nd	nd	1	drill core	0.1	estimated	0.1	0.05	0.01	0.15	0.2	0	0	0.03	0	0.1	0	0	0	nd	nd	-0.58	YSD	midpoint	0.275681	0.275681	-1.48306	0	0	-0.947835	-0.71545	0.00159171	0.693633
SI86-121	Langford 1989	9a	Hong Kong	22.5166	114.071	1 = Radiocarbon	536.47	116.085	548	133	234	Mud with peat material	Bulk organic	nd	nd	nd	nd	nd	1	drill core	0.1	estimated	0.1	0.05	0.01	0.15	0.2	0	0	0.03	0	0.1	0	0	0	nd	nd	0.12	YSD	midpoint	0.275681	0.275681	-1.49984	0	0	-0.973433	-0.736634	-0.00193899	0.707756
KWG-211	Huang et al. 1983	9a	Hong Kong	22.5309	114.068	1 = Radiocarbon	5480.68	167.102	5682	435	409	Dark grey shelly peaty mud with oyster shell	shell	greyish yellow mud	muddy silt	regressive	4	7.3	1	drill core	0.1	estimated	0.1	0.05	0.01	0.15	0.08	0	0	0.5	0	0.1	0	0	0	nd	nd	-3	YSD	midpoint	0.539907	0.539907	-1.50112	0	0	-0.975397	-0.738259	-0.00220991	0.70884
GF927	Langford 1989	9a	Hong Kong	22.4845	114.059	1 = Radiocarbon	3236.47	145.717	3461	373	385	Mud with peat material	Bulk organic	nd	nd	nd	nd	nd	1	drill core	0.1	estimated	0.1	0.05	0.01	0.15	0.2	0	0	0.03	0	0.1	0	0	0	nd	nd	1.61	YSD	midpoint	0.275681	0.275681	-1.51782	0	0	-1.00088	-0.75935	-0.00572507	0.7229
GF931	Langford 1989	9a	Hong Kong	22.4764	114.057	1 = Radiocarbon	3176.47	149.025	3383	437	417	Mud with peat material	Bulk organic	nd	nd	nd	nd	nd	1	drill core	0.1	estimated	0.1	0.05	0.01	0.15	0.2	0	0	0.03	0	0.1	0	0	0	nd	nd	1.62	YSD	midpoint	0.275681	0.275681	-1.5535	0	0	-1.01851	-0.751013	-0.0116252	0.71151
GF932	Langford 1989	9a	Hong Kong	22.4739	114.057	1 = Radiocarbon	6635.36	130.206	7514	209	245	Mud with peat material	wood	nd	nd	nd	nd	nd	1	drill core	0.1	estimated	0.1	0.05	0.01	0.15	0.2	0	0	0.03	0	0.1	0	0	0	nd	nd	0.42	YSD	midpoint	0.275681	0.275681	-1.55362	0	0	-1.01739	-0.74927	-0.0115941	0.710141
KWG-160	Huang et al. 1983	9a	Hong Kong	22.52	114.053	1 = Radiocarbon	5920.68	167.102	6149	419	425	oyster layer	Shell	grey muddy silt	grey silty fine sand	transgressive	6.9	0.2	1	drill core	0.1	estimated	0.1	0.05	0.01	0.15	0.138	0	0	0.5	0	0.1	0	0	0	nd	nd	-5.2	YSD	midpoint	0.551493	0.551493	-1.51897	0	0	-1.00264	-0.760808	-0.00596806	0.723872
Owen95A	Owen 1995	9a	Hong Kong	22.1586	114.051	1 = Radiocarbon	4340.68	449.044	4290	1141	1114	olive grey silt with scattered fine sand laminae, and abundant diatom and carbonate content	Shell	olive grey silt with scattered fine sand laminae, and abundant diatom and carbonate content	coarse olive grey sand and subangular gravel, low in organic matter comparing to succeeding marine mud	transgressive	3.29	>76.6	1	drill core	0.01	estimated	0.01	0.005	0.01	0.15	0.0658	0	0	0.03	0	0.1	0	0	0	nd	nd	-22.48	YSD	midpoint	0.194563	0.194563	-1.17299	0	0	-0.808021	-0.440508	0.00200512	0.394518
Owen95B	Owen 1995	9a	Hong Kong	22.1586	114.051	1 = Radiocarbon	8230.68	454.99	8632	1075	1048	coarse olive grey sand and subangular gravel, low in organic matter comparing to succeeding marine mud	Shell	olive grey silt with scattered fine sand laminae, and abundant diatom and carbonate content	upward coarsening olive grey silt	transgressive	6.12	>73.8	1	drill core	0.01	estimated	0.01	0.005	0.01	0.15	0.1224	0	0	0.03	0	0.1	0	0	0	nd	nd	-25.31	YSD	midpoint	0.220243	0.220243	-1.17299	0	0	-0.808021	-0.440508	0.00200512	0.394518
KWG-223	Huang et al. 1983; Zong 2004	9a	Hong Kong	22.5233	114.05	1 = Radiocarbon	2920.68	102.093	2524	309	343	grey shelly mud	Shell	yellowish grey silt	dark grey muddy silt	regressive	5.2	1.9	1	drill core	0.1	estimated	0.1	0.05	0.01	0.15	0.104	0	0	0.5	0	0.1	0	0	0	nd	nd	-3.5	YSD	midpoint	0.543982	0.543982	-1.52079	0	0	-1.00542	-0.763106	-0.00635101	0.725404
Beta-323532	Sun et al 2021	9a	Hong Kong	22.4909	114.04	1 = Radiocarbon	1500	30	895	206	201	firm light grey silt and fine sand with shells	Shell	soft dark grey clayey silt with organic matter	nd	transgressive	3.08	nd	1	russian core	0.01	estimated	0.01	0.005	0.01	0.15	0.0616	0	0	0.03	0	0.1	0	0	0	nd	nd	-0.82	YSD	midpoint	0.193183	0.193183	-1.55184	0	0	-1.03345	-0.774258	-0.0120403	0.729774
Beta-341291	Sun et al 2021	9a	Hong Kong	22.4909	114.04	1 = Radiocarbon	970	104.403	869	305	191	soft dark grey clayey silt with organic matter	Bulk organic	soft, dark brown clayey silt with high level of organic matter	firm light grey silt and fine sand with shells	transgressive	2.86	nd	1	russian core	0.05	estimated	0.05	0.025	0.01	0.15	0.0572	0	0	0.03	0	0.1	0	0	0	nd	nd	0.6	YSD	midpoint	0.193383	0.193383	-1.55184	0	0	-1.03345	-0.774258	-0.0120403	0.729774
Beta-341292	Sun et al 2021	9a	Hong Kong	22.4938	114.034	1 = Radiocarbon	1080	104.403	997	266	247	soft dark grey clayey silt with organic matter	Bulk organic	soft dark brown clayey silt with high level of organic matter	firm light grey silt and fine sand with shells	transgressive	1.27	nd	1	russian core	0.05	estimated	0.05	0.025	0.01	0.15	0.0254	0	0	0.03	0	0.1	0	0	0	nd	nd	-0.13	YSD	midpoint	0.186468	0.186468	-1.55142	0	0	-1.03722	-0.780125	-0.0121451	0.734384
Beta-323533	Sun et al 2021	9a	Hong Kong	22.494	114.034	1 = Radiocarbon	1270	30	679	195	163	firm light grey silt and fine sand with shells	Shell	soft dark grey clayey silt with organic matter	nd	transgressive	2.6	nd	1	russian core	0.01	estimated	0.01	0.005	0.01	0.15	0.052	0	0	0.03	0	0.1	0	0	0	nd	nd	-1.2	YSD	midpoint	0.190339	0.190339	-1.55142	0	0	-1.03725	-0.78017	-0.0121459	0.734419
GF928	Langford et al. 1989	9a	Hong Kong	22.446	114.033	1 = Radiocarbon	6776.47	170.612	7639	316	310	Mud with peat material	Bulk organic	nd	nd	nd	nd	nd	1	drill core	0.1	estimated	0.1	0.05	0.01	0.15	0.2	0	0	0.03	0	0.1	0	0	0	nd	nd	-1.88	YSD	midpoint	0.275681	0.275681	-1.55555	0	0	-1.00002	-0.722256	-0.0111117	0.688915
SI86-109	Langford et al. 1989	9a	Hong Kong	22.4481	114.022	1 = Radiocarbon	1865.36	96.9276	1780	213	233	Mud with peat material	wood	nd	nd	nd	nd	nd	1	drill core	0.1	estimated	0.1	0.05	0.01	0.15	0.2	0	0	0.03	0	0.1	0	0	0	nd	nd	0.02	YSD	midpoint	0.275681	0.275681	-1.55464	0	0	-1.00828	-0.73511	-0.0113412	0.699015
GF926	Langford et al. 1989	9a	Hong Kong	22.4377	114.016	1 = Radiocarbon	1563.95	75.7383	1451	233	145	Mud with peat material	wood	nd	nd	nd	nd	nd	1	drill core	0.1	estimated	0.1	0.05	0.01	0.15	0.2	0	0	0.03	0	0.1	0	0	0	nd	nd	-4.3	YSD	midpoint	0.275681	0.275681	-1.55745	0	0	-0.982912	-0.695642	-0.0106365	0.668004
SI86-122	Langford et al. 1989	9a	Hong Kong	22.4477	114.005	1 = Radiocarbon	3126.47	212.501	3316	514	529	Mud with peat material	Bulk organic	nd	nd	nd	nd	nd	1	drill core	0.1	estimated	0.1	0.05	0.01	0.15	0.2	0	0	0.03	0	0.1	0	0	0	nd	nd	-0.68	YSD	midpoint	0.275681	0.275681	-1.55443	0	0	-1.01015	-0.738005	-0.011393	0.70129
CS-621	Langford et al. 1989	9a	Hong Kong	22.4328	113.94	1 = Radiocarbon	10005.5	164.515	11558	877	456	firm dark grey silt to gravel with organic band	Bulk organic	soft grey silty clay with shells	stiff greyish to yellowish and yellowish clay to gravels with plant and feldspar fragment	transgressive	5.7	0.79	1	drill core	0.1	estimated	0.1	0.05	0.01	0.15	0.114	0	0	0.03	0	0.1	0	0	0	nd	nd	-8.57	YSD	midpoint	0.22135	0.22135	-1.5857	0	0	-0.97139	-0.564271	-0.0160678	0.542848
KWG-241	Huang et al. 1983; Li et al. 1991; Zong 2004	9a	Hong Kong	22.5	113.9	1 = Radiocarbon	4370.68	120.096	4335	427	385	Marine inlfuence facies	Shell	sand	sand	rgressive	4	nd	1	excavation	0.1	estimated	0.1	0.05	0.01	0	0	0	0	0.5	0	0.1	0	0	0	nd	nd	-0.5	YSD	midpoint	0.512445	0.512445	-1.6801	0	0	-1.1801	-0.6699	-0.0341833	0.6199
KWG-178	Xu et al. 1985; Li et al. 1991; Zong 2004	9a	Hong Kong	22.5333	113.9	1 = Radiocarbon	2178.81	134.776	2165	522	367	Silty clay with brackish to marine diatoms including Actinocyclus sp., Cyclotella sp.	Bulk organic	Clayey silt	coarse silt with abundant marine diatom species including Cuclostella striata	regressive	2.05	nd	1	drill core	0.1	estimated	0.1	0.05	0.01	0.15	0.041	0	0	0.5	0	0.1	0	0	0	nd	nd	-5.6	YSD	midpoint	0.535519	0.535519	-1.65532	0	0	-1.15532	-0.694682	-0.0300529	0.644682
KWG-177	Xu et al. 1985; Li et al. 1991; Zong 2004	9a	Hong Kong	22.5333	113.9	1 = Radiocarbon	2924.81	156.411	3084	360	328	coarse silt with abundant marine diatom species including Cuclostella striata	Bulk organic	Silty clay with brackish to marine diatoms including Actinocyclus sp., Cyclotella sp.	clayey silt with fine sand	nd	3	nd	1	drill core	0.1	estimated	0.1	0.05	0.01	0.15	0.06	0	0	0.5	0	0.1	0	0	0	nd	nd	-6.5	YSD	midpoint	0.537308	0.537308	-1.65532	0	0	-1.15532	-0.694682	-0.0300529	0.644682
Beta-429246	Xiong et al 2018	9a	Hong Kong	22.2017	113.896	1 = Radiocarbon	9290	40	10480	161	182	grey interbedded sandy silt and silty sand with multiple thin layers of peaty material	Plant fragment	grey interbedded clayey silt and sandy silt	hard reddish silt and clay	transgressive	41.7	nd	1	drill core	0.05	estimated	0.05	0.025	0.01	0.15	0.834	0	0	0.03	0	0.1	0	0	0	nd	nd	-51.5	YSD	midpoint	0.854214	0.854214	-1.21486	0	0	-0.874523	-0.616455	-0.0269376	0.541614
Beta-429245	Xiong et al 2018	9a	Hong Kong	22.2017	113.896	1 = Radiocarbon	9230	30	10390	110	126	grey interbedded sandy silt and silty sand with multiple thin layers of peaty material	Plant fragment	grey interbedded clayey silt and sandy silt	hard reddish silt and clay	transgressive	41	nd	1	drill core	0.05	estimated	0.05	0.025	0.01	0.15	0.82	0	0	0.03	0	0.1	0	0	0	nd	nd	-50.8	YSD	midpoint	0.84055	0.84055	-1.21486	0	0	-0.874523	-0.616455	-0.0269376	0.541614
Beta-429247	Xiong et al 2018	9a	Hong Kong	22.2017	113.896	1 = Radiocarbon	9350	30	10560	101	123	grey interbedded sandy silt and silty sand with multiple thin layers of peaty material	Plant fragment	grey interbedded clayey silt and sandy silt	hard reddish silt and clay	transgressive	42.1	nd	0	drill core	0.05	estimated	0.05	0.025	0.01	0.15	0.842	0	0	0.03	0	0.1	0	0	0	nd	nd	-51.9	YSD	midpoint	0.862026	0.862026	-1.21486	0	0	-0.874523	-0.616455	-0.0269376	0.541614
Beta-429249	Xiong et al 2018	9a	Hong Kong	22.209	113.892	1 = Radiocarbon	8910	40	10037	153	137	dark grey mud interbedded between sandy clayey silt and silty fine sand, with a little mottle, occasional shell and plant fragments and abundance of charcoal	Plant fragment	grennish grey mud with shell fragments	greyish brown mottled sandy clayey silt overlying brownish, gravelly fine sand to course sand	transgressive	34.86	nd	1	drill core	0.05	estimated	0.05	0.025	0.01	0.15	0.6972	0	0	0.03	0	0.1	0	0	0	nd	nd	-43.26	YSD	midpoint	0.721258	0.721258	-1.18526	0	0	-0.866686	-0.612971	-0.0245429	0.540743
Beta-429248	Xiong et al 2018	9a	Hong Kong	22.2086	113.892	1 = Radiocarbon	8880	30	10024	152	203	dark grey mud interbedded between sandy clayey silt and silty fine sand, with a little mottle, occasional shell and plant fragments and abundance of charcoal	Plant fragment	grennish grey mud with shell fragments	greyish brown mottled sandy clayey silt overlying brownish, gravelly fine sand to course sand	transgressive	34.54	nd	1	drill core	0.05	estimated	0.05	0.025	0.01	0.15	0.6908	0	0	0.03	0	0.1	0	0	0	nd	nd	-42.94	YSD	midpoint	0.715073	0.715073	-1.18544	0	0	-0.866735	-0.612993	-0.024558	0.540748
Beta-429255	Xiong et al 2018	9a	Hong Kong	22.21	113.89	1 = Radiocarbon	8570	40	9536	121	59	dark grey clayey silt with shell fragments and thin lenses of fine sand	Plant fragment	nd	dark grey clayey silt interbedded with sand and small gravel	transgressive	24.91	0.96	1	drill core	0.05	estimated	0.05	0.025	0.01	0.15	0.4982	0	0	0.03	0	0.1	0	0	0	nd	nd	-31.71	YSD	midpoint	0.531346	0.531346	-1.17838	0	0	-0.864865	-0.612162	-0.0239867	0.540541
Beta-429256	Xiong et al 2018	9a	Hong Kong	22.21	113.89	1 = Radiocarbon	8710	30	9641	238	93	dark grey clayey silt interbedded with sand and small gravel	Plant fragment	dark grey clayey silt with shell fragments and thin lenses of fine sand	reddish weathered bedrock	transgressive	25.73	0.14	0	drill core	0.05	estimated	0.05	0.025	0.01	0.15	0.5146	0	0	0.03	0	0.1	0	0	0	nd	nd	-32.53	YSD	midpoint	0.546752	0.546752	-1.17838	0	0	-0.864865	-0.612162	-0.0239867	0.540541
KWG-219	Huang et al. 1983	9a	Hong Kong	22.45	113.883	1 = Radiocarbon	6498.81	206.069	7378	397	476	Dark grey muddy sand	Bulk organic	greyish yellow sandy gravel	grey sand		8.9	6.1	1	drill core	0.1	estimated	0.1	0.05	0.01	0.15	0.178	0	0	0.5	0	0.1	0	0	0	nd	nd	-10.1	YSD	midpoint	0.562836	0.562836	-1.6902	0	0	-1.18041	-0.642654	-0.0356634	0.595102
KWG-186	Huang et al. 1986	9a	Hong Kong	22.45	113.883	1 = Radiocarbon	7108.81	188.851	7931	394	325	Grey silt with peat materia	Bulk organic	grey sand	bed rock	transgressive	14	1.7	0	drill core	0.1	estimated	0.1	0.05	0.01	0.15	0.28	0	0	0.5	0	0.1	0	0	0	nd	nd	-15.1	YSD	midpoint	0.60291	0.60291	-1.6902	0	0	-1.18041	-0.642654	-0.0356634	0.595102
KWG-237	Li et al. 1991; Zong 2004	9a	Hong Kong	22.45	113.88	1 = Radiocarbon	1308.81	122.33	1206	205	269	Fine sandy mud with plant material	Bulk organic	nd	medium sand	regressive	0.5	11.8	1	drill core	0.1	estimated	0.1	0.05	0.01	0.15	0.01	0	0	0.5	0	0.1	0	0	0	nd	nd	2	YSD	midpoint	0.534041	0.534041	-1.69023	0	0	-1.18046	-0.642673	-0.0356681	0.595115
OxA-5428	Fyfe et al 1999	9a	Hong Kong	22.1832	113.868	1 = Radiocarbon	390.682	438.88	245	498	244	Clayey silt with fine sand in thin lenses	Shell	nd	sand	transgressive	1.5	>68.5	1	drill core	0.05	estimated	0.05	0.025	0.01	0.15	0.03	0	0	0.03	0	0.1	0	2.5	0	nd	nd	-9.98	YSD	midpoint	2.507	2.507	-1.3073	0	0	-0.898992	-0.62733	-0.0344143	0.544332
OxA-5429	Fyfe et al 1999	9a	Hong Kong	22.1832	113.868	1 = Radiocarbon	390.682	438.88	245	498	244	Sand	Shell	clayey silt with fine sand in thin lenses	clayey silt with fine sand in thin lenses	transgressive	6	>64	1	drill core	0.05	estimated	0.05	0.025	0.01	0.15	0.12	0	0	0.03	0	0.1	0	2.5	0	nd	nd	-14.48	YSD	midpoint	2.50969	2.50969	-1.3073	0	0	-0.898992	-0.62733	-0.0344143	0.544332
OxA-5430	Fyfe et al 1999	9a	Hong Kong	22.1832	113.868	1 = Radiocarbon	390.682	438.88	245	498	244	Clayey silt with fine sand in thin lenses	Shell	sand	sandy mud in lenses, laminae and bands	transgressive	7	>63	1	drill core	0.05	estimated	0.05	0.025	0.01	0.15	0.14	0	0	0.03	0	0.1	0	2.5	0	nd	nd	-15.48	YSD	midpoint	2.51072	2.51072	-1.3073	0	0	-0.898992	-0.62733	-0.0344143	0.544332
WangPO01	Wang, 1993; Wang, 1998	9a	Hong Kong	22.2413	113.979	1 = Radiocarbon	3210.68	449.044	2877	1124	1144	Laminated cemented coarse shelly sand with gravels	Shell	Loose beach ridge sand bioturbated with plant roots	Dipped laminated cemented beach rock	regressive	5.165	nd	1	outcrop	0.1	estimated	0.1	0.05	0.025	0	0	0	0	0.5	0	0.1	0	0	0	nd	nd	0.905	YSD	midpoint	0.512957	0.512957	-1.43557	0	0	-0.850498	-0.600498	-0.0129976	0.549502
WangPO02	Wang, 1993; Wang, 1998	9a	Hong Kong	22.2413	113.979	1 = Radiocarbon	2770.68	448.013	2341	1081	1057	Dipped laminated cemented beach rock	Shell	Laminated cemented coarse shelly sand with gravels		regressive	5.28	nd	1	outcrop	0.1	estimated	0.1	0.05	0.06	0	0	0	0	0.5	0	0.1	0	0	0	nd	nd	0.72	YSD	midpoint	0.515849	0.515849	-1.43557	0	0	-0.850498	-0.600498	-0.0129976	0.549502
WangPO03	Wang, 1993; Wang, 1998	9a	Hong Kong	22.2413	113.979	1 = Radiocarbon	2090.68	446.112	1565	1054	934	Cemented shell sand with cross bedding	Shell	Dipped laminated cemented beach rock	nd	regressive	5.775	nd	1	outcrop	0.1	estimated	0.1	0.05	0.125	0	0	0	0	0.5	0	0.1	0	0	0	nd	nd	0.095	YSD	midpoint	0.527376	0.527376	-1.43557	0	0	-0.850498	-0.600498	-0.0129976	0.549502
WangCC01	Wang, 1998	9a	Hong Kong	22.2338	113.957	1 = Radiocarbon	1690.68	442.962	1136	987	871	Cemented shelly sand	Shell	Loose sand	nd	regressive	nd	nd	1	outcrop	0.1	estimated	0.1	0.05	0.075	0	0	1	0	0.5	0	0.1	0	0	0	nd	nd	0	YSD	midpoint	1.12611	1.12611	-1.38066	0	0	-0.852391	-0.602391	-0.0148909	0.547609
ANU-10154	Yim, 2006	9a	Hong Kong	22.2989	113.89	1 = Radiocarbon	4480	172.047	5124	459	477	Clay and silt dominated with shells and shell fragments	Bulk organic	Clay and silt dominated with shells and shell fragments	Poorly sorted and fining-upward sandy gravel	transgressive	0.85	11.15	1	drill core	0.1	estimated	0.1	0.05	0.01	0.15	0.017	0	0	0.5	0	0.1	0	0	0	nd	nd	-8.076	YSD	midpoint	0.534218	0.534218	-1.75635	0	0	-0.956349	-0.644372	-0.0461309	0.548593
ANU-10155	Yim, 2006	9a	Hong Kong	22.2989	113.89	1 = Radiocarbon	4540	214.709	5182	523	602	Clay and silt dominated with shells and shell fragments	Bulk organic	Clay and silt dominated with shells and shell fragments	Poorly sorted and fining-upward sandy gravel	transgressive	6.05	5.95	1	drill core	0.1	estimated	0.1	0.05	0.01	0.15	0.121	0	0	0.5	0	0.1	0	0	0	nd	nd	-13.276	YSD	midpoint	0.547486	0.547486	-1.75635	0	0	-0.956349	-0.644372	-0.0461309	0.548593
KIA-2287	Yim, 2006	9a	Hong Kong	22.2989	113.89	1 = Radiocarbon	4740	30	4809	248	276	Clay and silt dominated with shells and shell fragments	Shell	Clay and silt dominated with shells and shell fragments	Poorly sorted and fining-upward sandy gravel	transgressive	10.2	1.8	1	drill core	0.01	estimated	0.01	0.005	0.01	0.15	0.204	0	0	0.5	0	0.1	0	0	0	nd	nd	-17.426	YSD	midpoint	0.569422	0.569422	-1.75635	0	0	-0.956349	-0.644372	-0.0461309	0.548593
ANU-10156	Yim, 2006	9a	Hong Kong	22.2989	113.89	1 = Radiocarbon	5440	141.421	6216	314	306	Poorly sorted and fining-upward sandy gravel	Bulk organic	Clay and silt dominated with shells and shell fragments	Overconsolidated paleosol	transgressive	11.45	0.55	1	drill core	0.1	estimated	0.1	0.05	0.01	0.15	0.229	0	0	0.5	0	0.1	0	0	0	nd	nd	-18.676	YSD	midpoint	0.580983	0.580983	-1.75635	0	0	-0.956349	-0.644372	-0.0461309	0.548593
ANU-10157	Yim, 2006	9a	Hong Kong	22.2989	113.89	1 = Radiocarbon	19430	392.938	23409	825	909	Overconsolidated paleosol	Bulk organic	Poorly sorted and fining-upward sandy gravel	nd	transgressive	12.15	nd	1	drill core	0.1	estimated	0.1	0.05	0.01	0.15	0.243	0	0	0.5	0	0.1	0	0	0	nd	nd	-19.376	YSD	midpoint	0.586642	0.586642	-1.75635	0	0	-0.956349	-0.644372	-0.0461309	0.548593
KIA-2290	Yim, 2006	9a	Hong Kong	22.331	114.478	1 = Radiocarbon	780	30	249	198	210	Clay and silt dominated with shells and shell fragments	Shell	Clay and silt dominated with shells and shell fragments	Poorly sorted and fining-upward sandy gravel	transgressive	0.5	nd	1	drill core	0.01	estimated	0.01	0.005	0.01	0.15	0.01	0	0	0.5	0	0.1	0	0	0	nd	nd	-27.526	YSD	midpoint	0.531719	0.531719	-1.19402	0	0	-0.683152	-0.460869	-0.0110053	0.427717
KIA-2291	Yim, 2006	9a	Hong Kong	22.331	114.478	1 = Radiocarbon	1880	30	1288	210	201	Clay and silt dominated with shells and shell fragments	Shell	Clay and silt dominated with shells and shell fragments	Poorly sorted and fining-upward sandy gravel	transgressive	1.5	nd	1	drill core	0.01	estimated	0.01	0.005	0.01	0.15	0.03	0	0	0.5	0	0.1	0	0	0	nd	nd	-28.526	YSD	midpoint	0.532471	0.532471	-1.19402	0	0	-0.683152	-0.460869	-0.0110053	0.427717
KIA-2292	Yim, 2006	9a	Hong Kong	22.331	114.478	1 = Radiocarbon	2940	30	2550	199	224	Clay and silt dominated with shells and shell fragments	Shell	Clay and silt dominated with shells and shell fragments	Poorly sorted and fining-upward sandy gravel	transgressive	3.3	nd	1	drill core	0.01	estimated	0.01	0.005	0.01	0.15	0.066	0	0	0.5	0	0.1	0	0	0	nd	nd	-30.326	YSD	midpoint	0.535706	0.535706	-1.19402	0	0	-0.683152	-0.460869	-0.0110053	0.427717
KIA-2293	Yim, 2006	9a	Hong Kong	22.331	114.478	1 = Radiocarbon	7490	50	7779	198	207	Poorly sorted and fining-upward sandy gravel	Shell	Clay and silt dominated with shells and shell fragments	Overconsolidated paleosol	transgressive	7.25	nd	1	drill core	0.01	estimated	0.01	0.005	0.01	0.15	0.145	0	0	0.5	0	0.1	0	0	0	nd	nd	-34.276	YSD	midpoint	0.551044	0.551044	-1.19402	0	0	-0.683152	-0.460869	-0.0110053	0.427717
GIFA-101372	Yim, 2006	9a	Hong Kong	21.665	114.192	1 = Radiocarbon	5820	70	6049	239	267	Clay and silt dominated with shells and shell fragments	Shell	Clay and silt dominated with shells and shell fragments	Poorly sorted and fining-upward sandy gravel	transgressive	2.125	nd	1	drill core	0.01	estimated	0.01	0.005	0.125	0.15	0.0425	0	0	0.5	0	0.1	0	0	0	nd	nd	-55.156	YSD	midpoint	0.547683	0.547683	-0.971944	0	0	-0.671944	-0.380438	-0.00489052	0.338739
GIFA-101373	Yim, 2006	9a	Hong Kong	21.665	114.192	1 = Radiocarbon	9740	100	10519	453	341	Poorly sorted and fining-upward sandy gravel	Shell	Clay and silt dominated with shells and shell fragments	Overconsolidated paleosol	transgressive	2.375	nd	1	drill core	0.01	estimated	0.01	0.005	0.125	0.15	0.0475	0	0	0.5	0	0.1	0	0	0	nd	nd	-55.406	YSD	midpoint	0.548093	0.548093	-0.971944	0	0	-0.671944	-0.380438	-0.00489052	0.338739
GIFA-101374	Yim, 2006	9a	Hong Kong	21.6654	114.301	1 = Radiocarbon	2150	60	1576	248	242	Sand and graveldominated facies	Shell	Sand and graveldominated facies	nd	nd	0.125	nd	1	drill core	0.01	estimated	0.01	0.005	0.125	0.15	0.0025	0	0	0.5	0	0.1	0	0	0	nd	nd	-52.156	YSD	midpoint	0.546037	0.546037	-0.992932	0	0	-0.692932	-0.389318	-0.0026706	0.350041
GIFA-101375	Yim, 2006	9a	Hong Kong	21.6654	114.301	1 = Radiocarbon	4750	70	4823	324	312	Sand and graveldominated facies	Shell	Sand and graveldominated facies	nd	nd	0.625	nd	1	drill core	0.01	estimated	0.01	0.005	0.125	0.15	0.0125	0	0	0.5	0	0.1	0	0	0	nd	nd	-52.656	YSD	midpoint	0.546174	0.546174	-0.992932	0	0	-0.692932	-0.389318	-0.0026706	0.350041
GIFA-101376	Yim, 2006	9a	Hong Kong	21.6654	114.301	1 = Radiocarbon	2320	45	1777	241	245	Sand and graveldominated facies	Shell	Sand and graveldominated facies	nd	nd	0.625	nd	1	drill core	0.01	estimated	0.01	0.005	0.125	0.15	0.0125	0	0	0.5	0	0.1	0	0	0	nd	nd	-52.656	YSD	midpoint	0.546174	0.546174	-0.992932	0	0	-0.692932	-0.389318	-0.0026706	0.350041
GIFA-101377	Yim, 2006	9a	Hong Kong	21.6654	114.301	1 = Radiocarbon	4040	70	3899	313	300	Sand and graveldominated facies	Shell	Sand and graveldominated facies	nd	nd	0.625	nd	1	drill core	0.01	estimated	0.01	0.005	0.125	0.15	0.0125	0	0	0.5	0	0.1	0	0	0	nd	nd	-52.656	YSD	midpoint	0.546174	0.546174	-0.992932	0	0	-0.692932	-0.389318	-0.0026706	0.350041
GIFA-101378	Yim, 2006	9a	Hong Kong	21.6654	114.301	1 = Radiocarbon	3060	70	2690	266	308	Sand and graveldominated facies	Shell	Sand and graveldominated facies	nd	nd	0.625	nd	1	drill core	0.01	estimated	0.01	0.005	0.125	0.15	0.0125	0	0	0.5	0	0.1	0	0	0	nd	nd	-52.656	YSD	midpoint	0.546174	0.546174	-0.992932	0	0	-0.692932	-0.389318	-0.0026706	0.350041
GIFA-101379	Yim, 2006	9a	Hong Kong	21.6655	114.372	1 = Radiocarbon	830	60	301	197	235	Clay and silt dominated with shells and shell fragments	Shell	Clay and silt dominated with shells and shell fragments	Poorly sorted and fining-upward sandy gravel	transgressive	0.375	nd	1	drill core	0.01	estimated	0.01	0.005	0.125	0.15	0.0075	0	0	0.5	0	0.1	0	0	0	nd	nd	-59.406	YSD	midpoint	0.546083	0.546083	-1.11672	0	0	-0.612267	-0.362267	0.0365689	0.410405
GIFA-101380	Yim, 2006	9a	Hong Kong	21.6655	114.372	1 = Radiocarbon	7710	70	8005	260	243	Poorly sorted and fining-upward sandy gravel	Shell	Clay and silt dominated with shells and shell fragments	nd	transgressive	1.05	nd	1	drill core	0.01	estimated	0.01	0.005	0.05	0.15	0.021	0	0	0.5	0	0.1	0	0	0	nd	nd	-60.076	YSD	midpoint	0.53429	0.53429	-1.11672	0	0	-0.612267	-0.362267	0.0365689	0.410405
Gif-11683	Yim, 2006	9a	Hong Kong	21.6657	114.484	1 = Radiocarbon	2840	114.127	2979	343	227	Clay and silt dominated with shells and shell fragments	Bulk organic	Clay and silt dominated with shells and shell fragments	Poorly sorted and fining-upward sandy gravel	transgressive	0.125	nd	1	drill core	0.1	estimated	0.1	0.05	0.125	0.15	0.0025	0	0	0.5	0	0.1	0	0	0	nd	nd	-66.146	YSD	midpoint	0.548299	0.548299	-1.15913	0	0	-0.614668	-0.364668	0.0461719	0.432012
Gif-11689	Yim, 2006	9a	Hong Kong	21.6657	114.484	1 = Radiocarbon	3385	105.948	3632	256	238	Clay and silt dominated with shells and shell fragments	Bulk organic	Clay and silt dominated with shells and shell fragments	Poorly sorted and fining-upward sandy gravel	transgressive	0.375	nd	1	drill core	0.1	estimated	0.1	0.05	0.125	0.15	0.0075	0	0	0.5	0	0.1	0	0	0	nd	nd	-66.406	YSD	midpoint	0.548344	0.548344	-1.15913	0	0	-0.614668	-0.364668	0.0461719	0.432012
Gif-11686	Yim, 2006	9a	Hong Kong	21.6657	114.484	1 = Radiocarbon	3920	116.619	4350	455	362	Clay and silt dominated with shells and shell fragments	Bulk organic	Clay and silt dominated with shells and shell fragments	Poorly sorted and fining-upward sandy gravel	transgressive	0.625	nd	1	drill core	0.1	estimated	0.1	0.05	0.13	0.15	0.0125	0	0	0.5	0	0.1	0	0	0	nd	nd	-66.656	YSD	midpoint	0.549596	0.549596	-1.15913	0	0	-0.614668	-0.364668	0.0461719	0.432012
Gif-11676	Yim, 2006		Hong Kong	21.6657	114.484	1 = Radiocarbon	4690	107.703	5408	193	359	Clay and silt dominated with shells and shell fragments	Bulk organic	Clay and silt dominated with shells and shell fragments	Poorly sorted and fining-upward sandy gravel	transgressive	0.875	nd	1	drill core	0.1	estimated	0.1	0.05	0.13	0.15	0.0175	0	0	0.5	0	0.1	0	0	0	nd	nd	-66.906	YSD	midpoint	0.549733	0.549733	-1.15913	0	0	-0.614668	-0.364668	0.0461719	0.432012
Gif-11682	Yim, 2006	9a	Hong Kong	21.6657	114.484	1 = Radiocarbon	5420	119.269	6197	241	267	Clay and silt dominated with shells and shell fragments	Bulk organic	Clay and silt dominated with shells and shell fragments	Poorly sorted and fining-upward sandy gravel	transgressive	1.125	nd	1	drill core	0.1	estimated	0.1	0.05	0.13	0.15	0.0225	0	0	0.5	0	0.1	0	0	0	nd	nd	-67.156	YSD	midpoint	0.549915	0.549915	-1.15913	0	0	-0.614668	-0.364668	0.0461719	0.432012
GIFA-101381	Yim, 2006	9a	Hong Kong	21.6657	114.484	1 = Radiocarbon	6460	90	6740	308	306	Clay and silt dominated with shells and shell fragments	Shell	Clay and silt dominated with shells and shell fragments	Poorly sorted and fining-upward sandy gravel	transgressive	1.375	nd	1	drill core	0.01	estimated	0.01	0.005	0.13	0.15	0.0275	0	0	0.5	0	0.1	0	0	0	nd	nd	-67.406	YSD	midpoint	0.547888	0.547888	-1.15913	0	0	-0.614668	-0.364668	0.0461719	0.432012
Gif-11693	Yim, 2006	9a	Hong Kong	21.6657	114.484	1 = Radiocarbon	7040	128.062	7859	305	243	Clay and silt dominated with shells and shell fragments	Bulk organic	Clay and silt dominated with shells and shell fragments	Poorly sorted and fining-upward sandy gravel	transgressive	1.375	nd	1	drill core	0.1	estimated	0.1	0.05	0.13	0.15	0.0275	0	0	0.5	0	0.1	0	0	0	nd	nd	-67.406	YSD	midpoint	0.550142	0.550142	-1.15913	0	0	-0.614668	-0.364668	0.0461719	0.432012
Gif-11692	Yim, 2006	9a	Hong Kong	21.6657	114.484	1 = Radiocarbon	8995	119.269	10085	398	388	Clay and silt dominated with shells and shell fragments	Bulk organic	Clay and silt dominated with shells and shell fragments	Poorly sorted and fining-upward sandy gravel	transgressive	1.625	nd	1	drill core	0.1	estimated	0.1	0.05	0.13	0.15	0.0325	0	0	0.5	0	0.1	0	0	0	nd	nd	-67.656	YSD	midpoint	0.550415	0.550415	-1.15913	0	0	-0.614668	-0.364668	0.0461719	0.432012
Gif-11691	Yim, 2006	9a	Hong Kong	21.6657	114.484	1 = Radiocarbon	11440	192.938	13323	425	393	Poorly sorted and fining-upward sandy gravel	Bulk organic	Clay and silt dominated with shells and shell fragments	nd	transgressive	2.125	nd	1	drill core	0.1	estimated	0.1	0.05	0.13	0.15	0.0425	0	0	0.5	0	0.1	0	0	0	nd	nd	-68.156	YSD	midpoint	0.551095	0.551095	-1.15913	0	0	-0.614668	-0.364668	0.0461719	0.432012
GIFA-101382	Yim, 2006	9a	Hong Kong	21.6657	114.484	1 = Radiocarbon	9140	100	9722	385	298	Poorly sorted and fining-upward sandy gravel	Shell	Clay and silt dominated with shells and shell fragments	nd	transgressive	2.125	nd	1	drill core	0.01	estimated	0.01	0.005	0.13	0.15	0.0425	0	0	0.5	0	0.1	0	0	0	nd	nd	-68.156	YSD	midpoint	0.548845	0.548845	-1.15913	0	0	-0.614668	-0.364668	0.0461719	0.432012
GIFA-101383	Yim, 2006	9a	Hong Kong	21.6657	114.484	1 = Radiocarbon	9120	90	9694	383	280	Poorly sorted and fining-upward sandy gravel	Shell	Clay and silt dominated with shells and shell fragments	nd	transgressive	2.125	nd	1	drill core	0.01	estimated	0.01	0.005	0.13	0.15	0.0425	0	0	0.5	0	0.1	0	0	0	nd	nd	-68.156	YSD	midpoint	0.548845	0.548845	-1.15913	0	0	-0.614668	-0.364668	0.0461719	0.432012
GIFA-101384	Yim, 2006	9a	Hong Kong	21.6657	114.484	1 = Radiocarbon	9940	100	10814	357	372	Poorly sorted and fining-upward sandy gravel	Shell	Clay and silt dominated with shells and shell fragments	nd	transgressive	2.125	nd	1	drill core	0.01	estimated	0.01	0.005	0.13	0.15	0.0425	0	0	0.5	0	0.1	0	0	0	nd	nd	-68.156	YSD	midpoint	0.548845	0.548845	-1.15913	0	0	-0.614668	-0.364668	0.0461719	0.432012
GIFA-101385	Yim, 2006	9a	Hong Kong	21.6657	114.484	1 = Radiocarbon	10320	100	11343	424	348	Poorly sorted and fining-upward sandy gravel	Shell	Clay and silt dominated with shells and shell fragments	nd	transgressive	2.125	nd	1	drill core	0.01	estimated	0.01	0.005	0.13	0.15	0.0425	0	0	0.5	0	0.1	0	0	0	nd	nd	-68.156	YSD	midpoint	0.548845	0.548845	-1.15913	0	0	-0.614668	-0.364668	0.0461719	0.432012
GIFA-101386	Yim, 2006	9a	Hong Kong	21.6657	114.484	1 = Radiocarbon	10170	110	11120	424	426	Poorly sorted and fining-upward sandy gravel	Shell	Clay and silt dominated with shells and shell fragments	nd	transgressive	2.125	nd	1	drill core	0.01	estimated	0.01	0.005	0.13	0.15	0.0425	0	0	0.5	0	0.1	0	0	0	nd	nd	-68.156	YSD	midpoint	0.548845	0.548845	-1.15913	0	0	-0.614668	-0.364668	0.0461719	0.432012
GIFA-101387	Yim, 2006	9a	Hong Kong	21.6657	114.484	1 = Radiocarbon	8990	100	9529	379	335	Poorly sorted and fining-upward sandy gravel	Shell	Clay and silt dominated with shells and shell fragments	nd	transgressive	2.125	nd	1	drill core	0.01	estimated	0.01	0.005	0.13	0.15	0.0425	0	0	0.5	0	0.1	0	0	0	nd	nd	-68.156	YSD	midpoint	0.548845	0.548845	-1.15913	0	0	-0.614668	-0.364668	0.0461719	0.432012
Gif-11685	Yim, 2006	9a	Hong Kong	21.6657	114.484	1 = Radiocarbon	11020	152.398	12947	232	223	Poorly sorted and fining-upward sandy gravel	Bulk organic	Clay and silt dominated with shells and shell fragments	nd	transgressive	2.125	nd	1	drill core	0.1	estimated	0.1	0.05	0.13	0.15	0.0425	0	0	0.5	0	0.1	0	0	0	nd	nd	-68.156	YSD	midpoint	0.551095	0.551095	-1.15913	0	0	-0.614668	-0.364668	0.0461719	0.432012
GIFA-101388	Yim, 2006	9a	Hong Kong	21.6657	114.484	1 = Radiocarbon	10300	100	11315	427	370	Poorly sorted and fining-upward sandy gravel	Shell	Clay and silt dominated with shells and shell fragments	nd	transgressive	2.375	nd	1	drill core	0.01	estimated	0.01	0.005	0.13	0.15	0.0475	0	0	0.5	0	0.1	0	0	0	nd	nd	-68.406	YSD	midpoint	0.549255	0.549255	-1.15913	0	0	-0.614668	-0.364668	0.0461719	0.432012
Gif-11684	Yim, 2006	9a	Hong Kong	21.6657	114.484	1 = Radiocarbon	12625	176.139	39840	1109	1133	Poorly sorted and fining-upward sandy gravel	Bulk organic	Clay and silt dominated with shells and shell fragments	nd	transgressive	2.375	nd	1	drill core	0.1	estimated	0.1	0.05	0.13	0.15	0.0475	0	0	0.5	0	0.1	0	0	0	nd	nd	-68.406	YSD	midpoint	0.551504	0.551504	-1.15913	0	0	-0.614668	-0.364668	0.0461719	0.432012
GIFA-102054	Yim, 2006	9a	Hong Kong	21.6658	114.579	1 = Radiocarbon	3730	80	14938	587	734	Clay and silt dominated with shells and shell fragments	Shell	Clay and silt dominated with shells and shell fragments	Poorly sorted and fining-upward sandy gravel	transgressive	0.875	nd	1	drill core	0.01	estimated	0.01	0.005	0.13	0.15	0.0175	0	0	0.5	0	0.1	0	0	0	nd	nd	-69.906	YSD	midpoint	0.547477	0.547477	-1.18259	0	0	-0.615996	-0.365996	0.0514827	0.443961
GIFA-101392	Yim, 2006	9a	Hong Kong	21.6658	114.679	1 = Radiocarbon	5050	80	5192	278	318	Clay and silt dominated with shells and shell fragments	Shell	Clay and silt dominated with shells and shell fragments	Poorly sorted and fining-upward sandy gravel	transgressive	1.625	nd	1	drill core	0.01	estimated	0.01	0.005	0.13	0.15	0.0325	0	0	0.5	0	0.1	0	0	0	nd	nd	-74.656	YSD	midpoint	0.548162	0.548162	-1.19787	0	0	-0.616861	-0.366861	0.054942	0.451745
GIFA-101395	Yim, 2006	9a	Hong Kong	21.6659	114.864	1 = Radiocarbon	1750	60	1154	205	228	Clay and silt dominated with shells and shell fragments	Shell	Clay and silt dominated with shells and shell fragments	Poorly sorted and fining-upward sandy gravel	transgressive	0.375	nd	1	drill core	0.01	estimated	0.01	0.005	0.13	0.15	0.0075	0	0	0.5	0	0.1	0	0	0	nd	nd	-80.406	YSD	midpoint	0.547249	0.547249	-1.23635	0	0	-0.61649	-0.36649	0.0759762	0.493442
GIFA-101396	Yim, 2006	9a	Hong Kong	21.6659	114.864	1 = Radiocarbon	10280	100	11286	416	397	Poorly sorted and fining-upward sandy gravel	Shell	Clay and silt dominated with shells and shell fragments	nd	transgressive	0.875	nd	1	drill core	0.01	estimated	0.01	0.005	0.13	0.15	0.0175	0	0	0.5	0	0.1	0	0	0	nd	nd	-80.906	YSD	midpoint	0.547477	0.547477	-1.23635	0	0	-0.61649	-0.36649	0.0759762	0.493442
GIFA-101397	Yim, 2006	9a	Hong Kong	21.6659	114.992	1 = Radiocarbon	12140	120	13491	350	341	Poorly sorted and fining-upward sandy gravel	Shell	Clay and silt dominated with shells and shell fragments	nd	transgressive	1.1	nd	1	drill core	0.01	estimated	0.01	0.005	0.1	0.15	0.022	0	0	0.5	0	0.1	0	0	0	nd	nd	-85.126	YSD	midpoint	0.541303	0.541303	-1.22194	0	0	-0.615484	-0.365484	0.0736302	0.487745
GIFA-101398	Yim, 2006	9a	Hong Kong	21.6655	115.086	1 = Radiocarbon	9040	100	9597	396	326	Clay and silt dominated with shells and shell fragments	Shell	Clay and silt dominated with shells and shell fragments	Poorly sorted and fining-upward sandy gravel	transgressive	0.375	nd	1	drill core	0.01	estimated	0.01	0.005	0.13	0.15	0.0075	0	0	0.5	0	0.1	0	0	0	nd	nd	-91.406	YSD	midpoint	0.547249	0.547249	-1.21384	0	0	-0.614919	-0.364919	0.0723108	0.484541
GIFA-101399	Yim, 2006	9a	Hong Kong	21.6655	115.086	1 = Radiocarbon	5390	90	5582	288	273	Poorly sorted and fining-upward sandy gravel	Shell	Clay and silt dominated with shells and shell fragments	nd	transgressive	1.05	nd	1	drill core	0.01	estimated	0.01	0.005	0.05	0.15	0.021	0	0	0.5	0	0.1	0	0	0	nd	nd	-92.076	YSD	midpoint	0.53429	0.53429	-1.21384	0	0	-0.614919	-0.364919	0.0723108	0.484541
Gif-11678	Yim, 2006	9a	Hong Kong	21.665	115.262	1 = Radiocarbon	10440	148.661	12293	420	461	Clay and silt dominated with shells and shell fragments	Bulk organic	Clay and silt dominated with shells and shell fragments	Poorly sorted and fining-upward sandy gravel	transgressive	0.125	nd	1	drill core	0.1	estimated	0.1	0.05	0.13	0.15	0.0025	0	0	0.5	0	0.1	0	0	0	nd	nd	-102.156	YSD	midpoint	0.54946	0.54946	-1.20335	0	0	-0.614187	-0.364187	0.0706034	0.480394
Gif-11674	Yim, 2006	9a	Hong Kong	21.665	115.262	1 = Radiocarbon	3050	105.948	3234	230	281	Clay and silt dominated with shells and shell fragments	Bulk organic	Clay and silt dominated with shells and shell fragments	Poorly sorted and fining-upward sandy gravel	transgressive	0.375	nd	1	drill core	0.1	estimated	0.1	0.05	0.13	0.15	0.0075	0	0	0.5	0	0.1	0	0	0	nd	nd	-102.406	YSD	midpoint	0.549505	0.549505	-1.20335	0	0	-0.614187	-0.364187	0.0706034	0.480394
Gif-11677	Yim, 2006	9a	Hong Kong	21.665	115.262	1 = Radiocarbon	3690	114.127	4036	368	315	Clay and silt dominated with shells and shell fragments	Bulk organic	Clay and silt dominated with shells and shell fragments	Poorly sorted and fining-upward sandy gravel	transgressive	0.625	nd	1	drill core	0.1	estimated	0.1	0.05	0.13	0.15	0.0125	0	0	0.5	0	0.1	0	0	0	nd	nd	-102.656	YSD	midpoint	0.549596	0.549596	-1.20335	0	0	-0.614187	-0.364187	0.0706034	0.480394
Gif-11687	Yim, 2006	9a	Hong Kong	21.665	115.262	1 = Radiocarbon	4945	107.703	5694	225	222	Clay and silt dominated with shells and shell fragments	Bulk organic	Clay and silt dominated with shells and shell fragments	Poorly sorted and fining-upward sandy gravel	transgressive	0.875	nd	1	drill core	0.1	estimated	0.1	0.05	0.13	0.15	0.0175	0	0	0.5	0	0.1	0	0	0	nd	nd	-102.906	YSD	midpoint	0.549733	0.549733	-1.20335	0	0	-0.614187	-0.364187	0.0706034	0.480394
GIFA-101400	Yim, 2006	9a	Hong Kong	21.665	115.262	1 = Radiocarbon	6190	75	6441	267	248	Clay and silt dominated with shells and shell fragments	Shell	Clay and silt dominated with shells and shell fragments	Poorly sorted and fining-upward sandy gravel	transgressive	1.125	nd	1	drill core	0.01	estimated	0.01	0.005	0.13	0.15	0.0225	0	0	0.5	0	0.1	0	0	0	nd	nd	-103.156	YSD	midpoint	0.54766	0.54766	-1.20335	0	0	-0.614187	-0.364187	0.0706034	0.480394
GIFA-101401	Yim, 2006	9a	Hong Kong	21.665	115.262	1 = Radiocarbon	9870	110	10714	395	408	Clay and silt dominated with shells and shell fragments	Shell	Clay and silt dominated with shells and shell fragments	Poorly sorted and fining-upward sandy gravel	transgressive	1.125	nd	1	drill core	0.01	estimated	0.01	0.005	0.13	0.15	0.0225	0	0	0.5	0	0.1	0	0	0	nd	nd	-103.156	YSD	midpoint	0.54766	0.54766	-1.20335	0	0	-0.614187	-0.364187	0.0706034	0.480394
GIFA-101402	Yim, 2006	9a	Hong Kong	21.665	115.262	1 = Radiocarbon	4140	80	4032	327	319	Clay and silt dominated with shells and shell fragments	Shell	Clay and silt dominated with shells and shell fragments	Poorly sorted and fining-upward sandy gravel	transgressive	1.125	nd	1	drill core	0.01	estimated	0.01	0.005	0.13	0.15	0.0225	0	0	0.5	0	0.1	0	0	0	nd	nd	-103.156	YSD	midpoint	0.54766	0.54766	-1.20335	0	0	-0.614187	-0.364187	0.0706034	0.480394
Gif-11688	Yim, 2006	9a	Hong Kong	21.665	115.262	1 = Radiocarbon	5590	128.062	6390	281	378	Clay and silt dominated with shells and shell fragments	Bulk organic	Clay and silt dominated with shells and shell fragments	Poorly sorted and fining-upward sandy gravel	transgressive	1.125	nd	1	drill core	0.1	estimated	0.1	0.05	0.13	0.15	0.0225	0	0	0.5	0	0.1	0	0	0	nd	nd	-103.156	YSD	midpoint	0.549915	0.549915	-1.20335	0	0	-0.614187	-0.364187	0.0706034	0.480394
GIFA-101403	Yim, 2006	9a	Hong Kong	21.665	115.262	1 = Radiocarbon	8290	134.536	8661	416	375	Poorly sorted and fining-upward sandy gravel	Shell	Clay and silt dominated with shells and shell fragments	nd	transgressive	1.375	nd	1	drill core	0.01	estimated	0.01	0.005	0.13	0.15	0.0275	0	0	0.5	0	0.1	0	0	0	nd	nd	-103.406	YSD	midpoint	0.547888	0.547888	-1.20335	0	0	-0.614187	-0.364187	0.0706034	0.480394
Gif-11690	Yim, 2006	9a	Hong Kong	21.665	115.262	1 = Radiocarbon	11430	130	13309	264	210	Poorly sorted and fining-upward sandy gravel	Bulk organic	Clay and silt dominated with shells and shell fragments	nd	transgressive	1.375	nd	1	drill core	0.1	estimated	0.1	0.05	0.13	0.15	0.0275	0	0	0.5	0	0.1	0	0	0	nd	nd	-103.406	YSD	midpoint	0.550142	0.550142	-1.20335	0	0	-0.614187	-0.364187	0.0706034	0.480394
GIFA-101404	Yim, 2006	9a	Hong Kong	21.665	115.262	1 = Radiocarbon	10670	148.661	11855	552	526	Poorly sorted and fining-upward sandy gravel	Shell	Clay and silt dominated with shells and shell fragments	nd	transgressive	1.65	nd	1	drill core	0.01	estimated	0.01	0.005	0.15	0.15	0.033	0	0	0.5	0	0.1	0	0	0	nd	nd	-103.676	YSD	midpoint	0.553276	0.553276	-1.20335	0	0	-0.614187	-0.364187	0.0706034	0.480394
Gif-11675	Yim, 2006	9a	Hong Kong	21.665	115.262	1 = Radiocarbon	9840	110	11284	451	476	Poorly sorted and fining-upward sandy gravel	Bulk organic	Clay and silt dominated with shells and shell fragments	nd	transgressive	1.65	nd	1	drill core	0.1	estimated	0.1	0.05	0.15	0.15	0.033	0	0	0.5	0	0.1	0	0	0	nd	nd	-103.676	YSD	midpoint	0.555508	0.555508	-1.20335	0	0	-0.614187	-0.364187	0.0706034	0.480394
GIFA-101405	Yim, 2006	9a	Hong Kong	21.6354	115.355	1 = Radiocarbon	12340	306.757	13787	989	722	Clay and silt dominated with shells and shell fragments	Shell	Clay and silt dominated with shells and shell fragments	Poorly sorted and fining-upward sandy gravel	transgressive	0.875	nd	1	drill core	0.01	estimated	0.01	0.005	0.13	0.15	0.0175	0	0	0.5	0	0.1	0	0	0	nd	nd	-106.906	YSD	midpoint	0.547477	0.547477	-0.95255	0	0	-0.55255	-0.35	0.0256376	0.35255
GIFA-101406	Yim, 2006	9a	Hong Kong	21.6354	115.355	1 = Radiocarbon	4670	80	4716	314	309	Yellowish siliciclastic sand with shell fragments.	Shell	Poorly sorted and fining-upward sandy gravel	nd	transgressive	1.425	nd	1	drill core	0.01	estimated	0.01	0.005	0.175	0.15	0.0285	0	0	0.5	0	0.1	0	0	0	nd	nd	-107.456	YSD	midpoint	0.560323	0.560323	-0.95255	0	0	-0.55255	-0.35	0.0256376	0.35255
GIFA-101407	Yim, 2006	9a	Hong Kong	21.5451	115.497	1 = Radiocarbon	12640	110	14147	582	407	Clay and silt dominated with shells and shell fragments	Shell	Clay and silt dominated with shells and shell fragments	Poorly sorted and fining-upward sandy gravel	transgressive	0.875	nd	1	drill core	0.01	estimated	0.01	0.005	0.13	0.15	0.0175	0	0	0.5	0	0.1	0	0	0	nd	nd	-114.906	YSD	midpoint	0.547477	0.547477	-0.950615	0	0	-0.550615	-0.35	0.0251537	0.350615
GIFA-101408	Yim, 2006	9a	Hong Kong	21.5451	115.497	1 = Radiocarbon	6240	90	6495	287	277	Poorly sorted and fining-upward sandy gravel	Shell	Clay and silt dominated with shells and shell fragments	nd	transgressive	1.45	nd	1	drill core	0.01	estimated	0.01	0.005	0.2	0.15	0.029	0	0	0.5	0	0.1	0	0	0	nd	nd	-115.476	YSD	midpoint	0.568653	0.568653	-0.950615	0	0	-0.550615	-0.35	0.0251537	0.350615
GIFA-101409	Yim, 2006	9a	Hong Kong	21.4617	115.588	1 = Radiocarbon	11760	130	13093	317	332	Poorly sorted and fining-upward sandy gravel	Shell	Clay and silt dominated with shells and shell fragments	nd	transgressive	0.625	nd	1	drill core	0.01	estimated	0.01	0.005	0.13	0.15	0.0125	0	0	0.5	0	0.1	0	0	0	nd	nd	-118.656	YSD	midpoint	0.54734	0.54734	-0.795067	0	0	-0.498356	-0.323767	-0.0440583	0.198356
GIFA-102053	Yim, 2006	9a	Hong Kong	21.4617	115.588	1 = Radiocarbon	9050	90	9607	359	315	Poorly sorted and fining-upward sandy gravel	Shell	Clay and silt dominated with shells and shell fragments	nd	transgressive	0.875	nd	1	drill core	0.01	estimated	0.01	0.005	0.13	0.15	0.0175	0	0	0.5	0	0.1	0	0	0	nd	nd	-118.906	YSD	midpoint	0.547477	0.547477	-0.795067	0	0	-0.498356	-0.323767	-0.0440583	0.198356
KWG-123	Huang et al. 1986; Li et al 1991	9a	E_PRD	23.1597	113.929	1 = Radiocarbon	7750.68	102.093	8049	288	283	Shell mound archaeology site	Shell	nd	nd	nd	nd	nd	0	excavation	0.1	estimated	0.1	0.05	0.01	0.05	0	0	0	0.5	0	0.1	0	0	0	nd	nd	2	YSD	midpoint	0.514879	0.514879	-2.49312	0	0	-1.27555	-0.698902	-0.0489018	0.652196
KWG-216	Huang et al. 1986; Li et al, 1991	9a	E_PRD	22.751	113.899	1 = Radiocarbon	5900.68	203.035	6127	489	486	Shelly mud with oyster shells	Oyster shells	nd	nd	regressive	11	nd	1	drill core	0.1	estimated	0.1	0.05	0.01	0.15	0.22	0	0	0.5	0	0.1	0	0	0	nd	nd	-13.8	YSD	midpoint	0.577495	0.577495	-3.22838	0	0	-1.34279	-0.721397	-0.0321506	0.692795
KWG-171	Huang et al. 1986	9a	E_PRD	22.751	113.899	1 = Radiocarbon	5610.68	178.67	5819	446	417	Oyster shell muddy sediment	Oyster shells	nd	nd	regressive	10.4	nd	1	drill core	0.1	estimated	0.1	0.05	0.01	0.15	0.208	0	0	0.5	0	0.1	0	0	0	nd	nd	-12.2	YSD	midpoint	0.573031	0.573031	-3.22838	0	0	-1.34279	-0.721397	-0.0321506	0.692795
ZK-103	Li et al., 1991; Xiong et al. 2020	9a	E_PRD	23.2012	113.85	1 = Radiocarbon	4310.68	106.527	4256	370	378	shell mound	Shell	nd	nd	transgressive	nd	nd	1	excavation	0.1	estimated	0.1	0.05	0.01	0.05	0	0	0	0.5	0	0.1	0	0	0	nd	nd	1.1	YSD	midpoint	0.514879	0.514879	-2.41817	0	0	-1.27328	-0.703444	-0.0534444	0.643111
KWG-222	Huang et al. 1983; Zong 2004	9a	E_PRD	22.7667	113.817	1 = Radiocarbon	1488.81	128.314	1393	304	266	Dark grey muddy silt with small amount of peat and shells of river calm	Bulk organic	fill	dark grey sandy silt with oyster	regressive	2.4	7.5	1	drill core	0.1	estimated	0.1	0.05	0.01	0.15	0.048	0	0	0.5	0	0.1	0	0	0	nd	nd	-1.1	YSD	midpoint	0.536101	0.536101	-3.22516	0	0	-1.34172	-0.72086	-0.032285	0.69172
KWG-175	Xu et al. 1983; Huang et al. 1983; Zong 2004	9a	E_PRD	22.6667	113.8	1 = Radiocarbon	1158.81	134.776	1075	227	284	Silty clay with brackish to marine diatoms including Actinocyclus sp., Cyclotella sp.	Bulk organic	mud	clayey sand	transgressive	1.55	nd	1	hand core	0.1	estimated	0.1	0.05	0.01	0.15	0.031	0	0	0.5	0	0.1	0	0	0	nd	nd	-3.6	YSD	midpoint	0.534847	0.534847	-2.65142	0	0	-1.26796	-0.683979	-0.0375	0.633979
KWG-176	Xu et al. 1983; Huang et al. 1983; Zong 2004	9a	E_PRD	22.6667	113.8	1 = Radiocarbon	668.811	122.33	632	270	154	Silty clay with brackish to marine diatoms including Actinocyclus sp., Cyclotella sp.	Bulk organic	mud	clayey sand	transgressive	0.8	nd	1	hand core	0.1	estimated	0.1	0.05	0.01	0.15	0.016	0	0	0.5	0	0.1	0	0	0	nd	nd	-2.8	YSD	midpoint	0.534187	0.534187	-2.65142	0	0	-1.26796	-0.683979	-0.0375	0.633979
KWG-232	Huang et al. 1986	9a	E_PRD	22.7545	113.791	1 = Radiocarbon	6085.36	190.646	6950	468	453	Mangrove plant macros	Mangrove	nd	nd	regressive	12.2	nd	1	drill core	0.1	estimated	0.1	0.05	0.01	0.15	0.244	0	0	0.5	0	0.1	0	0	0	nd	nd	-6.9	YSD	midpoint	0.587057	0.587057	-3.21444	0	0	-1.33815	-0.719073	-0.0327318	0.688146
KWG-170	Huang et al. 1983; Zong 2004	9a	E_PRD	22.75	113.783	1 = Radiocarbon	2430.68	106.527	1914	364	324	Shelly mud	Shell	nd	nd	regressive	nd	nd	1	drill core	0.1	estimated	0.1	0.05	0.01	0.15	0.2	0	0	0.5	0	0.1	0	0	0	nd	nd	-4.1	YSD	midpoint	0.570175	0.570175	-3.20996	0	0	-1.33665	-0.718327	-0.0329183	0.686653
KWG-227	Huang et al. 1983; Zong 2004	9a	E_PRD	22.75	113.783	1 = Radiocarbon	818.811	116.895	756	199	201	Brackish to freahwater marsh peat	Bulk organic	nd	beach sediment	transgressive	0	0.5	1	hand core	0.1	estimated	0.1	0.05	0.01	0.15	0	0	0	0.5	0	0.1	0	0	0	nd	nd	1	YSD	midpoint	0.533948	0.533948	-3.20996	0	0	-1.33665	-0.718327	-0.0329183	0.686653
KWG-167	Xu et al. 1985; Li et al. 1991; Zong 2004	9a	E_PRD	22.8	113.75	1 = Radiocarbon	3598.81	148.878	3913	468	420	fine silty clay with brackish–marine diatom species including Cyclostella striata	Bulk organic	clay with brackish–marine diatom species including Cyclostella striata	sandy clay with mostly brackish diatoms		1.4	nd	1	drill core	0.1	estimated	0.1	0.05	0.01	0.15	0.028	0	0	0.5	0	0.1	0	0	0	nd	nd	-4.7	YSD	midpoint	0.534681	0.534681	-3.25031	0	0	-1.3501	-0.725052	-0.031237	0.700104
KWG-172	Xu et al. 1985; Li et al. 1991; Zong 2004	9a	E_PRD	22.7667	113.75	1 = Radiocarbon	988.811	116.895	892	283	210	Silty clay with brackish to marine diatoms including Actinocyclus sp., Cyclotella sp.	Bulk organic	mud	clayey sand	transgressive	0.8	nd	1	hand core	0.1	estimated	0.1	0.05	0.01	0.15	0.016	0	0	0.5	0	0.1	0	0	0	nd	nd	-3.9	YSD	midpoint	0.534187	0.534187	-3.21538	0	0	-1.33846	-0.71923	-0.0326925	0.68846
KWG-173	Xu et al. 1985; Li et al. 1991; Zong 2004	9a	E_PRD	22.8	113.75	1 = Radiocarbon	6058.81	180.456	6302	456	437	Silty clay with brackish to marine diatoms including Actinocyclus sp., Cyclotella sp.	Shell	clay with brackish–marine diatom species including Cyclostella striata	Coarse sandy silt with quartz	transgressive	2.02	nd	1	drill core	0.1	estimated	0.1	0.05	0.01	0.15	0.0404	0	0	0.5	0	0.1	0	0	0	nd	nd	-5.9	YSD	midpoint	0.535474	0.535474	-3.25031	0	0	-1.3501	-0.725052	-0.031237	0.700104
DGST1	Huang et al. 1986	9a	E_PRD	22.9188	113.62	1 = Radiocarbon	1443.95	94.532	1347	185	170	Marine mud with plant material	Rotten wood, organic material	nd	nd	regressive	3.02	nd	1	drill core	0.1	estimated	0.1	0.05	0.01	0.15	0.0604	0	0	0.5	0	0.1	0	0	0	nd	nd	-3.5	YSD	midpoint	0.537353	0.537353	-3.32071	0	0	-1.32071	-0.670711	-0.00517781	0.75
KWG-100	Li et al. 1991; Zong 2004	9a	E_PRD	23.0667	113.617	1 = Radiocarbon	2698.81	180.456	2818	500	468	Silty clay with marine and brackish diatom	Bulk organic	nd	medium sand	transgressive	1.6	31	1	drill core	0.1	estimated	0.1	0.05	0.01	0.15	0.032	0	0	0.5	0	0.1	0	0	0	nd	nd	0.6	YSD	midpoint	0.534906	0.534906	-2.29774	0	0	-1.26963	-0.710743	-0.0607432	0.628514
KWG-700	Li et al 1991; Zong et al. 2013	9a	E_PRD	22.9341	113.484	1 = Radiocarbon	3871.28	138.268	4285	514	390	Dark grey, soft, silt and clay	Bulk organic	Disturbed farming soil	nd	transgressive	10.7	nd	1	drill core	0.1	estimated	0.1	0.05	0.01	0.15	0.214	0	0	0.5	0	0.1	0	0	0	nd	nd	-10.2	YSD	midpoint	0.575236	0.575236	-2.91218	0	0	-1.28825	-0.673504	-0.023504	0.702992
KWG-796	Li et al 1991; Zong et al. 2013	9a	E_PRD	22.9341	113.484	1 = Radiocarbon	2351.28	134.881	2410	332	353	dark grey silt and clay	Bulk organic	Filled material	Yellowish grey fine sand	transgressive	6.8	nd	1	drill core	0.1	estimated	0.1	0.05	0.01	0.15	0.136	0	0	0.5	0	0.1	0	0	0	nd	nd	-3.5	YSD	midpoint	0.550995	0.550995	-2.91218	0	0	-1.28825	-0.673504	-0.023504	0.702992
KWG-693	Li et al 1991; Zong 2004; Zong et al. 2013	9a	E_PRD	22.93	113.35	1 = Radiocarbon	1700.68	80.92	1105	239	253	Dark grey peaty mud with brackish diatom assemblage including mostly Cyclotella stylorum and Cyclotella striata.	Shell	greyish brown sandy mud with brackish diatom assemblage	shelly peaty dark grey mud with marine and brackish diatom assemblage	regressive	3.9	11.4	1	drill core	0.1	estimated	0.1	0.05	0.01	0.15	0.078	0	0	0.5	0	0.1	0	0	0	nd	nd	-2.7	YSD	midpoint	0.539615	0.539615	-1.47533	0	0	-0.962643	-0.631677	-0.0450642	0.527462
KWG-690	Li et al 1991; Zong 2004; Zong et al. 2013	9a	E_PRD	22.9333	113.35	1 = Radiocarbon	2820.68	102.093	2409	319	338	Peaty shelly mud with oyster shell >50% marine diatoms e.g. Cosinodiscus divisus	Shell	mud with peat material	peaty shelly mud	regressive	5.9	9.4	1	drill core	0.1	estimated	0.1	0.05	0.01	0.15	0.118	0	0	0.5	0	0.1	0	0	0	nd	nd	-4.7	YSD	midpoint	0.546831	0.546831	-1.47499	0	0	-0.962088	-0.631448	-0.0449579	0.527419
KWG-890	Li et al 1991	9a	E_PRD	22.933	113.35	1 = Radiocarbon	7421.28	172.316	8225	359	350	mud with >70% fresh water diatom and less marine brackish diatoms	Bulk organic	nd	nd	regressive	nd	nd	1	drill core	0.1	estimated	0.1	0.05	0.01	0.15	0.2	0	0	0.5	0	0.1	0	0	0	nd	nd	-13.9	YSD	midpoint	0.570175	0.570175	-1.47503	0	0	-0.962144	-0.631471	-0.0449686	0.527423
KWG-62	Li et al 1982; Zong 2004	9a	W_PRD	22.6667	113.583	1 = Radiocarbon	1638.81	128.314	1530	289	230	Shelly silty mud with oyster shells and bivalve including, Arca granosa, Arca subcrenata	Bulk organic	nd	shelly mud	regressive	4.3	11.4	1	drill core	0.1	estimated	0.1	0.05	0.01	0.15	0.086	0	0	0.5	0	0.1	0	0	0	nd	nd	-4.3	YSD	midpoint	0.540829	0.540829	-3.1634	0	0	-1.32113	-0.710567	-0.0348581	0.671135
KWG-13	Huang et al. 1982; Li et al. 1991; Zong 2004	9a	W_PRD	22.3	113.55	1 = Radiocarbon	1548.81	134.776	1452	272	275	Dark grey silty mud	Bulk organic	yellow grey silty clay	grey muddy silt	regressive	2.6	6.1	1	drill core	0.1	estimated	0.1	0.05	0.01	0.15	0.052	0	0	0.5	0	0.1	0	0	0	nd	nd	-1.4	YSD	midpoint	0.536474	0.536474	-1.7803	0	0	-1.00219	-0.596717	-0.0258209	0.497811
GZ2088	Zong et al. 2013; Yang et al. 2012	9a	W_PRD	22.7056	113.514	1 = Radiocarbon	1175	105.304	1094	205	258	Dark grey silt and fine sand with organic matter throughout and shell fragments at 2.0 m and 8.0 m	Bulk organic	Brown to grey clay with rich organic matter	Dark grey clay with organic matter and shells	transgressive	2.4	nd	1	drill core	0.05	estimated	0.05	0.025	0.01	0.05	0	0	0	0.5	0	0.1	0	0	0	nd	nd	-1.9	YSD	midpoint	0.513055	0.513055	-3.22808	0	0	-1.34269	-0.721346	-0.0321635	0.692692
GZ2089	Zong et al. 2013; Yang et al. 2012	9a	W_PRD	22.7056	113.514	1 = Radiocarbon	1817	104.12	1721	270	299	Dark grey silt and fine sand with organic matter throughout and shell fragments at 2.0 m and 8.0 m	Bulk organic	Brown to grey clay with rich organic matter	Dark grey clay with organic matter and shells	transgressive	6.8	nd	1	drill core	0.05	estimated	0.05	0.025	0.01	0.05	0	0	0	0.5	0	0.1	0	0	0	nd	nd	-6.3	YSD	midpoint	0.513055	0.513055	-3.22808	0	0	-1.34269	-0.721346	-0.0321635	0.692692
GZ2090	Zong et al. 2013; Yang et al. 2012	9a	W_PRD	22.7056	113.514	1 = Radiocarbon	2452	107.703	2531	227	347	Dark grey silt and fine sand with organic matter throughout and shell fragments at 2.0 m and 8.0 m	Bulk organic	Brown to grey clay with rich organic matter	Dark grey clay with organic matter and shells	transgressive	10.5	nd	1	drill core	0.05	estimated	0.05	0.025	0.01	0.05	0	0	0	0.5	0	0.1	0	0	0	nd	nd	-10	YSD	midpoint	0.513055	0.513055	-3.22808	0	0	-1.34269	-0.721346	-0.0321635	0.692692
GZ2091	Zong et al. 2013; Yang et al. 2012	9a	W_PRD	22.7056	113.514	1 = Radiocarbon	3698	103.846	4045	358	318	Dark grey clay with organic matter and shells	Bulk organic	Dark grey silt and fine sand with organic matter throughout and shell fragments at 2.0 m and 8.0 m	nd	transgressive	12.8	nd	1	drill core	0.05	estimated	0.05	0.025	0.01	0.05	0	0	0	0.5	0	0.1	0	0	0	nd	nd	-12.3	YSD	midpoint	0.513055	0.513055	-3.22808	0	0	-1.34269	-0.721346	-0.0321635	0.692692
KWG-179	Xu et al. 1983; Li et al. 1991; Zong 2004	9a	W_PRD	22.35	113.45	1 = Radiocarbon	1650.68	102.093	1055	262	289	Clayey silt with marine diatoms including Actinocyclus sp.	Shell	Clayey silt with marine diatoms including Actinocyclus sp.	silty clay	transgressive	0.85	nd	1	hand core	0.1	estimated	0.1	0.05	0.01	0.15	0.017	0	0	0.5	0	0.1	0	0	0	nd	nd	-4.4	YSD	midpoint	0.534218	0.534218	-1.73024	0	0	-1.00775	-0.588373	-0.0279068	0.492248
ZSSX1	Huang et al. 1981; Huang et al., 1986	9a	W_PRD	22.3572	113.442	1 = Radiocarbon	1650.68	102.093	1055	262	289	Shell layer	Shell fragments	nd	nd	regressive	2.5	nd	1	drill core	0.1	estimated	0.1	0.05	0.01	0	0	0	0	0.5	0	0.1	0	0	0	nd	nd	-1.2	YSD	midpoint	0.512445	0.512445	-1.72899	0	0	-1.00789	-0.588165	-0.0279588	0.49211
GC-480	Huang et al. 1981	9a	W_PRD	22.5295	113.438	1 = Radiocarbon	5420.68	254.604	5610	595	642	Oyster layer(Ostrea rivularis; O. plicatula; O gigas) with small amount of gravel	Shell	grey gravelly sand	nd	regressive	2	na	1	drill core	0.1	estimated	0.1	0.05	0.01	0.05	0	0	0	0.5	0	0.1	0	0	0	nd	nd	0.2	YSD	midpoint	0.514879	0.514879	-2.47281	0	0	-1.15526	-0.651755	-0.0314693	0.577632
KWG-40	Huang et al. 1983	9a	W_PRD	22.6796	113.423	1 = Radiocarbon	6180.68	176.7	6437	444	447	dark grey muddy silt with oyster shell	Shell	brownish yellow silty clay	Yellowish red silty clay	regressive	9	8.7	1	drill core	0.1	estimated	0.1	0.05	0.01	0.15	0.18	0	0	0.5	0	0.1	0	0	0	nd	nd	-7.4	YSD	midpoint	0.563471	0.563471	-3.24149	0	0	-1.34716	-0.723582	-0.0316044	0.697165
KWG-46	Huang et al. 1982	9a	W_PRD	22.8445	113.391	1 = Radiocarbon	5048.81	201.716	5802	473	475	Dark grey muddy medium to fine sand	Bulk organic	Dark grey muddy silty fine sand	grey sandy gravel	transgressive	9.7	3.5	1	drill core	0.1	estimated	0.1	0.05	0.01	0.15	0.194	0	0	0.5	0	0.1	0	0	0	nd	nd	-8.9	YSD	midpoint	0.568099	0.568099	-3.33994	0	0	-1.33994	-0.689941	-0.00998516	0.75
KWG-99	Li et al 1991	9a	W_PRD	22.5729	113.39	1 = Radiocarbon	4738.81	156.411	5445	441	468	subtidal mud	Bulk organic	subtidal mud	subtidal mud	na	na	na	1	drill core	0.1	estimated	0.1	0.05	0.01	0.15	0.2	0	0	0.5	0	0.1	0	0	0	nd	nd	-5.9	YSD	midpoint	0.570175	0.570175	-3.22942	0	0	-1.34314	-0.721569	-0.0321076	0.693139
KWG-48	Huang et al. 1982; Zong 2004	9a	W_PRD	22.45	113.383	1 = Radiocarbon	1418.81	122.33	1324	243	264	Clayey silt with pollen of Chenodiaceae	Bulk organic	nd	intercalated silt and clayey silt with pollen of Chenodiaceae	regressive	3	16.2	1	drill core	0.1	estimated	0.1	0.05	0.01	0.15	0.06	0	0	0.5	0	0.1	0	0	0	nd	nd	-2.2	YSD	midpoint	0.537308	0.537308	-1.72474	0	0	-1.00836	-0.587457	-0.0281358	0.491638
KWG-43	Huang et al. 1982; Li et al 1991; Zong 2004	9a	W_PRD	22.85	113.383	1 = Radiocarbon	2070.68	102.093	1492	319	275	Shelly silty mud with oyster shells and bivalve including, Arca granosa, Arca subcrenata	Shell	silty sand	silty mud	regressive	4	6.1	1	drill core	0.1	estimated	0.1	0.05	0.01	0.15	0.08	0	0	0.5	0	0.1	0	0	0	nd	nd	-6.7	YSD	midpoint	0.539907	0.539907	-3.33959	0	0	-1.33959	-0.689587	-0.00989685	0.75
DMDLS1	Huang et al. 1986; Li et al 1991	9a	W_PRD	22.2179	113.372	1 = Radiocarbon	8440.68	228.742	8848	595	557	Shelly mud with oyster shells	Shell fragments	nd	nd	regressive	16.1	nd	1	drill core	0.1	estimated	0.1	0.05	0.01	0.15	0.322	0	0	0.5	0	0.1	0	0	0	nd	nd	-54.7	YSD	midpoint	0.623525	0.623525	-1.69066	0	0	-1.01215	-0.581777	-0.0295557	0.487851
KWG-86	Huang et al. 1981	9a	W_PRD	22.5167	113.35	1 = Radiocarbon	5410.68	157.553	5605	412	417	Oyster shell layer	Shell	nd	nd	na	2.5	17	1	drill core	0.1	estimated	0.1	0.05	0.01	0.15	0.05	0	0	0.5	0	0.1	0	0	0	nd	nd	-1.4	YSD	midpoint	0.536284	0.536284	-2.4031	0	0	-1.13918	-0.646392	-0.030799	0.569588
KWG-155	Li et al 1991	9a	W_PRD	22.5167	113.35	1 = Radiocarbon	5830.68	129.318	6056	336	355	shelly mud with oyster shells	Shell	subtidal mud	subtidal mud	na	7.6	13	1	drill core	0.1	estimated	0.1	0.05	0.01	0.15	0.152	0	0	0.5	0	0.1	0	0	0	nd	nd	-6	YSD	midpoint	0.555161	0.555161	-2.4031	0	0	-1.13918	-0.646392	-0.030799	0.569588
GC-477	Huang et al. 1981; Huang et al. 1982	9a	W_PRD	22.8333	113.283	1 = Radiocarbon	6310.68	303.847	6581	681	680	Dark grey clayey clay with oyster shell	Shell	dark grey silty clay with plant material	nd	transgressive	0.5	nd	1	drill core	0.1	estimated	0.1	0.05	0.01	0.15	0.01	0	0	0.5	0	0.1	0	0	0	nd	nd	-0.5	YSD	midpoint	0.534041	0.534041	-2.18819	0	0	-0.982341	-0.587603	-0.00141812	0.613861
KWG-98	Huang et al. 1983; Li et al. 1991; Zong 2004	9a	W_PRD	22.8333	113.283	1 = Radiocarbon	6940.68	157.553	7254	349	396	Shelly mud with oyster shells	Shell	mud	mud	regressive	10	18	1	drill core	0.1	estimated	0.1	0.05	0.01	0.15	0.2	0	0	0.5	0	0.1	0	0	0	nd	nd	-8.4	YSD	midpoint	0.570175	0.570175	-2.18819	0	0	-0.982341	-0.587603	-0.00141812	0.613861
RH-?	Huang et al. 1982; Li et al 1991; Zong 2004	9a	W_PRD	22.7167	113.25	1 = Radiocarbon	7855.36	191.953	8719	551	495	subtidal mud with peat material	Plant fragment	subtidal mud	terrestrial sediment	transgressive	20.7	0.2	0	drill core	0.1	estimated	0.1	0.05	0.01	0.15	0.414	0	0	0.5	0	0.1	0	0	0	nd	nd	-22.6	YSD	midpoint	0.154596	0.675645	-2.33495	0	0	-1.02427	-0.595839	-0.00123094	0.63183
GC-483	Huang et al. 1982	9a	W_PRD	22.6742	113.238	1 = Radiocarbon	5330.68	254.604	5506	600	647	Oyster shell layer including species of Ostrea rivularis, Ostrea plicatula, Ostrea Gigas, Ostrea Talienwhanensis	shell	Dark grey clayey silt with oyster shells including species of Ostrea rivularis, Ostrea plicatula, Ostrea Gigas, Ostrea Talienwhanensis	nd	na	7.7	13	1	drill core	0.1	estimated	0.1	0.05	0.01	0.15	0.154	0	0	0.5	0	0.1	0	0	0	nd	nd	-5.6	YSD	midpoint	0.555712	0.555712	-3.35009	0	0	-1.35009	-0.70009	-0.0125224	0.75
Beta628986	Lin et al. 2023	9a	W_PRD	22.4832	113.234	1 = Radiocarbon	3450	30	3165	223	245	Grey silty clay with fine sand laminations.	Shell fragments	Clayey silt with plant material	Grey silty clay and intercalated with fine sand and shell fragments	regressive	8.75	21.25	1	drill core	0.01	estimated	0.01	0.005	0.01	0.15	0.175	0	0	0.03	0	0.1	0	1	0	nd	nd	-7.75	YSD	midpoint	1.03158	1.03158	-1.71618	0	0	-1.00931	-0.58603	-0.0284926	0.490687
Beta628987	Lin et al. 2023	9a	W_PRD	22.4832	113.234	1 = Radiocarbon	5090	30	5250	225	271	Grey silty clay with fine sand laminations.	Shell fragments	Clayey silt with plant material	Grey silty clay and intercalated with fine sand and shell fragments	regressive	12.75	17.25	1	drill core	0.01	estimated	0.01	0.005	0.01	0.15	0.255	0	0	0.03	0	0.1	0	1	0	nd	nd	-11.75	YSD	midpoint	1.04812	1.04812	-1.71618	0	0	-1.00931	-0.58603	-0.0284926	0.490687
Beta628988	Lin et al. 2023	9a	W_PRD	22.4832	113.234	1 = Radiocarbon	7940	30	8241	184	222	Grey silty clay and intercalated with fine sand and shell fragments	Shell fragments	Grey silty clay with fine sand laminations.	Dark grey silty clay with complete shells and shell fragments	regressive	20.75	9.25	1	drill core	0.01	estimated	0.01	0.005	0.01	0.15	0.415	0	0	0.03	0	0.1	0	1	0	nd	nd	-19.75	YSD	midpoint	1.09807	1.09807	-1.71618	0	0	-1.00931	-0.58603	-0.0284926	0.490687
Beta628989	Lin et al. 2023	9a	W_PRD	22.4832	113.234	1 = Radiocarbon	7820	30	8115	210	188	Grey silty clay and intercalated with fine sand and shell fragments	Shell fragments	Grey silty clay with fine sand laminations.	Dark grey silty clay with complete shells and shell fragments	regressive	23.15	6.85	1	drill core	0.01	estimated	0.01	0.005	0.01	0.15	0.463	0	0	0.03	0	0.1	0	1	0	nd	nd	-22.15	YSD	midpoint	1.11709	1.11709	-1.71618	0	0	-1.00931	-0.58603	-0.0284926	0.490687
STU22001	Lin et al. 2023	9a	W_PRD	22.4832	113.234	3 = Optically stimulated luminescence	n.a.	n.a.	500	30	30	Grey silty clay with fine sand laminations.	Quartz	Clayey silt with plant material	Grey silty clay and intercalated with fine sand and shell fragments	regressive	5.65	24.35	1	drill core	0.05	estimated	0.05	0.025	0.01	0.15	0.113	0	0	0.03	0	0.1	0	1	0	nd	nd	-4.65	YSD	midpoint	1.02318	1.02318	-1.71618	0	0	-1.00931	-0.58603	-0.0284926	0.490687
STU22002	Lin et al. 2023	9a	W_PRD	22.4832	113.234	3 = Optically stimulated luminescence	n.a.	n.a.	1390	90	90	Grey silty clay with fine sand laminations.	Quartz	Clayey silt with plant material	Grey silty clay and intercalated with fine sand and shell fragments	regressive	7.05	22.95	1	drill core	0.05	estimated	0.05	0.025	0.01	0.15	0.141	0	0	0.03	0	0.1	0	1	0	nd	nd	-6.05	YSD	midpoint	1.02665	1.02665	-1.71618	0	0	-1.00931	-0.58603	-0.0284926	0.490687
STU22003	Lin et al. 2023	9a	W_PRD	22.4832	113.234	3 = Optically stimulated luminescence	n.a.	n.a.	3150	160	160	Grey silty clay with fine sand laminations.	Quartz	Clayey silt with plant material	Grey silty clay and intercalated with fine sand and shell fragments	regressive	8.75	21.25	1	drill core	0.05	estimated	0.05	0.025	0.01	0.15	0.175	0	0	0.03	0	0.1	0	1	0	nd	nd	-7.75	YSD	midpoint	1.03187	1.03187	-1.71618	0	0	-1.00931	-0.58603	-0.0284926	0.490687
STU22004	Lin et al. 2023	9a	W_PRD	22.4832	113.234	3 = Optically stimulated luminescence	n.a.	n.a.	2330	130	130	Grey silty clay with fine sand laminations.	Quartz	Clayey silt with plant material	Grey silty clay and intercalated with fine sand and shell fragments	regressive	9.55	20.45	1	drill core	0.05	estimated	0.05	0.025	0.01	0.15	0.191	0	0	0.03	0	0.1	0	1	0	nd	nd	-8.55	YSD	midpoint	1.0347	1.0347	-1.71618	0	0	-1.00931	-0.58603	-0.0284926	0.490687
STU22005	Lin et al. 2023	9a	W_PRD	22.4832	113.234	3 = Optically stimulated luminescence	n.a.	n.a.	3760	200	200	Grey silty clay with fine sand laminations.	Quartz	Clayey silt with plant material	Grey silty clay and intercalated with fine sand and shell fragments	regressive	11.15	18.85	1	drill core	0.05	estimated	0.05	0.025	0.01	0.15	0.223	0	0	0.03	0	0.1	0	1	0	nd	nd	-10.15	YSD	midpoint	1.04108	1.04108	-1.71618	0	0	-1.00931	-0.58603	-0.0284926	0.490687
STU22006	Lin et al. 2023	9a	W_PRD	22.4832	113.234	3 = Optically stimulated luminescence	n.a.	n.a.	3820	190	190	Grey silty clay and intercalated with fine sand and shell fragments	Quartz	Grey silty clay with fine sand laminations.	Dark grey silty clay with complete shells and shell fragments	regressive	12.05	17.95	1	drill core	0.05	estimated	0.05	0.025	0.01	0.15	0.241	0	0	0.03	0	0.1	0	1	0	nd	nd	-11.05	YSD	midpoint	1.04509	1.04509	-1.71618	0	0	-1.00931	-0.58603	-0.0284926	0.490687
STU22007	Lin et al. 2023	9a	W_PRD	22.4832	113.234	3 = Optically stimulated luminescence	n.a.	n.a.	4510	240	240	Grey silty clay and intercalated with fine sand and shell fragments	Quartz	Grey silty clay with fine sand laminations.	Dark grey silty clay with complete shells and shell fragments	regressive	12.75	17.25	1	drill core	0.05	estimated	0.05	0.025	0.01	0.15	0.255	0	0	0.03	0	0.1	0	1	0	nd	nd	-11.75	YSD	midpoint	1.0484	1.0484	-1.71618	0	0	-1.00931	-0.58603	-0.0284926	0.490687
STU22008	Lin et al. 2023	9a	W_PRD	22.4832	113.234	3 = Optically stimulated luminescence	n.a.	n.a.	5200	300	300	Grey silty clay and intercalated with fine sand and shell fragments	Quartz	Grey silty clay with fine sand laminations.	Dark grey silty clay with complete shells and shell fragments	regressive	13.65	16.35	1	drill core	0.05	estimated	0.05	0.025	0.01	0.15	0.273	0	0	0.03	0	0.1	0	1	0	nd	nd	-12.65	YSD	midpoint	1.05293	1.05293	-1.71618	0	0	-1.00931	-0.58603	-0.0284926	0.490687
STU22009	Lin et al. 2023	9a	W_PRD	22.4832	113.234	3 = Optically stimulated luminescence	n.a.	n.a.	4480	230	230	Dark grey silty clay with complete shells and shell fragments	Quartz	Grey silty clay and intercalated with fine sand and shell fragments	Stiff greyish-yellow silty clay	regressive	15.15	14.85	1	drill core	0.05	estimated	0.05	0.025	0.01	0.15	0.303	0	0	0.03	0	0.1	0	1	0	nd	nd	-14.15	YSD	midpoint	1.0611	1.0611	-1.71618	0	0	-1.00931	-0.58603	-0.0284926	0.490687
STU22010	Lin et al. 2023	9a	W_PRD	22.4832	113.234	3 = Optically stimulated luminescence	n.a.	n.a.	7700	400	400	Dark grey silty clay with complete shells and shell fragments	Quartz	Grey silty clay and intercalated with fine sand and shell fragments	Stiff greyish-yellow silty clay	regressive	18.35	11.65	1	drill core	0.05	estimated	0.05	0.025	0.01	0.15	0.367	0	0	0.03	0	0.1	0	1	0	nd	nd	-17.35	YSD	midpoint	1.08112	1.08112	-1.71618	0	0	-1.00931	-0.58603	-0.0284926	0.490687
STU22011	Lin et al. 2023	9a	W_PRD	22.4832	113.234	3 = Optically stimulated luminescence	n.a.	n.a.	7400	400	400	Dark grey silty clay with complete shells and shell fragments	Quartz	Grey silty clay and intercalated with fine sand and shell fragments	Stiff greyish-yellow silty clay	regressive	20.75	9.25	1	drill core	0.05	estimated	0.05	0.025	0.01	0.15	0.415	0	0	0.03	0	0.1	0	1	0	nd	nd	-19.75	YSD	midpoint	1.09834	1.09834	-1.71618	0	0	-1.00931	-0.58603	-0.0284926	0.490687
STU22012	Lin et al. 2023	9a	W_PRD	22.4832	113.234	3 = Optically stimulated luminescence	n.a.	n.a.	7700	400	400	Dark grey silty clay with complete shells and shell fragments	Quartz	Grey silty clay and intercalated with fine sand and shell fragments	Stiff greyish-yellow silty clay	regressive	23.15	6.85	1	drill core	0.05	estimated	0.05	0.025	0.01	0.15	0.463	0	0	0.03	0	0.1	0	1	0	nd	nd	-22.15	YSD	midpoint	1.11736	1.11736	-1.71618	0	0	-1.00931	-0.58603	-0.0284926	0.490687
STU22013	Lin et al. 2023	9a	W_PRD	22.4832	113.234	3 = Optically stimulated luminescence	n.a.	n.a.	6200	300	300	Dark grey silty clay with complete shells and shell fragments	Quartz	Grey silty clay and intercalated with fine sand and shell fragments	Stiff greyish-yellow silty clay	regressive	24.75	5.25	1	drill core	0.05	estimated	0.05	0.025	0.01	0.15	0.495	0	0	0.03	0	0.1	0	1	0	nd	nd	-23.75	YSD	midpoint	1.131	1.131	-1.71618	0	0	-1.00931	-0.58603	-0.0284926	0.490687
STU22014	Lin et al. 2023	9a	W_PRD	22.4832	113.234	3 = Optically stimulated luminescence	n.a.	n.a.	8000	400	400	Dark grey silty clay with complete shells and shell fragments	Quartz	Grey silty clay and intercalated with fine sand and shell fragments	Stiff greyish-yellow silty clay	regressive	25.55	4.45	1	drill core	0.05	estimated	0.05	0.025	0.01	0.15	0.511	0	0	0.03	0	0.1	0	1	0	nd	nd	-24.55	YSD	midpoint	1.13809	1.13809	-1.71618	0	0	-1.00931	-0.58603	-0.0284926	0.490687
STU22015	Lin et al. 2023	9a	W_PRD	22.4832	113.234	3 = Optically stimulated luminescence	n.a.	n.a.	7900	400	400	Dark grey silty clay with complete shells and shell fragments	Quartz	Grey silty clay and intercalated with fine sand and shell fragments	Stiff greyish-yellow silty clay	regressive	26.35	3.65	1	drill core	0.05	estimated	0.05	0.025	0.01	0.15	0.527	0	0	0.03	0	0.1	0	1	0	nd	nd	-25.35	YSD	midpoint	1.14536	1.14536	-1.71618	0	0	-1.00931	-0.58603	-0.0284926	0.490687
PRD05001	Liu et al. 2013	9a	W_PRD	22.5233	113.184	1 = Radiocarbon	1915	200	1852	470	440	Greyish yellow silty sand interbedded with sandy silt	Bulk organic	Yellowish grey silt with plant material	Greyish yellow sand with fine gravel containing molluscs and barnacles shell	regressive	4.5	30.5	1	drill core	0.05	estimated	0.05	0.025	0.01	0.5	0.09	0	0	0.5	0	0.1	0	0	0	nd	nd	-3.38	YSD	midpoint	0.720295	0.720295	-1.71549	0	0	-1.00939	-0.585915	-0.0285213	0.49061
PRD05002	Liu et al. 2013	9a	W_PRD	22.5233	113.184	1 = Radiocarbon	2065	180	2030	457	481	Greyish yellow silty sand interbedded with sandy silt	Bulk organic	Yellowish grey silt with plant material	Greyish yellow sand with fine gravel containing molluscs and barnacles shell	regressive	5.5	29.5	1	drill core	0.05	estimated	0.05	0.025	0.01	0.5	0.11	0	0	0.5	0	0.1	0	0	0	nd	nd	-4.38	YSD	midpoint	0.723066	0.723066	-1.71549	0	0	-1.00939	-0.585915	-0.0285213	0.49061
PRD05003	Liu et al. 2013	9a	W_PRD	22.5233	113.184	1 = Radiocarbon	2355	150	2412	338	407	Greyish yellow silty sand interbedded with sandy silt	Bulk organic	Yellowish grey silt with plant material	Greyish yellow sand with fine gravel containing molluscs and barnacles shell	regressive	6.5	28.5	1	drill core	0.05	estimated	0.05	0.025	0.01	0.5	0.13	0	0	0.5	0	0.1	0	0	0	nd	nd	-5.38	YSD	midpoint	0.726378	0.726378	-1.71549	0	0	-1.00939	-0.585915	-0.0285213	0.49061
PRD05004	Liu et al. 2013	9a	W_PRD	22.5233	113.184	1 = Radiocarbon	2955	160	3116	335	352	Greyish yellow silty sand interbedded with sandy silt	Bulk organic	Yellowish grey silt with plant material	Greyish yellow sand with fine gravel containing molluscs and barnacles shell	regressive	10.5	24.5	1	drill core	0.05	estimated	0.05	0.025	0.01	0.5	0.21	0	0	0.5	0	0.1	0	0	0	nd	nd	-9.38	YSD	midpoint	0.744866	0.744866	-1.71549	0	0	-1.00939	-0.585915	-0.0285213	0.49061
PRD05005	Liu et al. 2013	9a	W_PRD	22.5233	113.184	1 = Radiocarbon	3681	94	4022	324	299	Greyish yellow sand with fine gravel containing molluscs and barnacles shell	Bulk organic	Greyish yellow silty sand interbedded with sandy silt	Sandy silt with abundant molluscs	regressive	11.5	23.5	1	drill core	0.05	estimated	0.05	0.025	0.01	0.5	0.23	0	0	0.5	0	0.1	0	0	0	nd	nd	-10.38	YSD	midpoint	0.75075	0.75075	-1.71549	0	0	-1.00939	-0.585915	-0.0285213	0.49061
PRD05006	Liu et al. 2013	9a	W_PRD	22.5233	113.184	1 = Radiocarbon	5185	115	5953	315	293	Sandy silt with abundant molluscs	Bulk organic	Greyish yellow sand with fine gravel containing molluscs and barnacles shell	Dark grey silty clay	regressive	12.5	22.5	1	drill core	0.05	estimated	0.05	0.025	0.01	0.5	0.25	0	0	0.5	0	0.1	0	0	0	nd	nd	-11.38	YSD	midpoint	0.757116	0.757116	-1.71549	0	0	-1.00939	-0.585915	-0.0285213	0.49061
PRD05007	Liu et al. 2013	9a	W_PRD	22.5233	113.184	1 = Radiocarbon	5530	180	6322	407	399	Sandy silt with abundant molluscs	Bulk organic	Greyish yellow sand with fine gravel containing molluscs and barnacles shell	Dark grey silty clay	regressive	13	22	1	drill core	0.05	estimated	0.05	0.025	0.01	0.5	0.26	0	0	0.5	0	0.1	0	0	0	nd	nd	-11.88	YSD	midpoint	0.760477	0.760477	-1.71549	0	0	-1.00939	-0.585915	-0.0285213	0.49061
PRD05008	Liu et al. 2013	9a	W_PRD	22.5233	113.184	1 = Radiocarbon	6380	135	7286	279	307	Sandy silt with abundant molluscs	Bulk organic	Greyish yellow sand with fine gravel containing molluscs and barnacles shell	Dark grey silty clay	regressive	13.5	21.5	1	drill core	0.05	estimated	0.05	0.025	0.01	0.5	0.27	0	0	0.5	0	0.1	0	0	0	nd	nd	-12.38	YSD	midpoint	0.763954	0.763954	-1.71549	0	0	-1.00939	-0.585915	-0.0285213	0.49061
PRD05009	Liu et al. 2013	9a	W_PRD	22.5233	113.184	1 = Radiocarbon	6450	180	7339	325	390	Dark grey silty clay	Bulk organic	Sandy silt with abundant molluscs	Dark grey cayey silt interbedded withsandy silt with locally molluscs	regressive	15	20	1	drill core	0.05	estimated	0.05	0.025	0.01	0.5	0.3	0	0	0.5	0	0.1	0	0	0	nd	nd	-13.88	YSD	midpoint	0.775065	0.775065	-1.71549	0	0	-1.00939	-0.585915	-0.0285213	0.49061
PRD05010	Liu et al. 2013	9a	W_PRD	22.5233	113.184	1 = Radiocarbon	7000	155	7828	339	255	Dark grey silty clay	Bulk organic	Sandy silt with abundant molluscs	Dark grey cayey silt interbedded withsandy silt with locally molluscs	regressive	16	19	1	drill core	0.05	estimated	0.05	0.025	0.01	0.5	0.32	0	0	0.5	0	0.1	0	0	0	nd	nd	-14.88	YSD	midpoint	0.783023	0.783023	-1.71549	0	0	-1.00939	-0.585915	-0.0285213	0.49061
PRD05011	Liu et al. 2013	9a	W_PRD	22.5233	113.184	1 = Radiocarbon	7570	180	8372	597	393	Dark grey silty clay	Bulk organic	Sandy silt with abundant molluscs	Dark grey cayey silt interbedded withsandy silt with locally molluscs	regressive	18	17	1	drill core	0.05	estimated	0.05	0.025	0.01	0.5	0.36	0	0	0.5	0	0.1	0	0	0	nd	nd	-16.88	YSD	midpoint	0.800203	0.800203	-1.71549	0	0	-1.00939	-0.585915	-0.0285213	0.49061
PRD05012	Liu et al. 2013	9a	W_PRD	22.5233	113.184	1 = Radiocarbon	8640	240	9702	539	670	Dark grey silty clay	Bulk organic	Sandy silt with abundant molluscs	Dark grey cayey silt interbedded withsandy silt with locally molluscs	regressive	20	15	1	drill core	0.05	estimated	0.05	0.025	0.01	0.5	0.4	0	0	0.5	0	0.1	0	0	0	nd	nd	-18.88	YSD	midpoint	0.818978	0.818978	-1.71549	0	0	-1.00939	-0.585915	-0.0285213	0.49061
PRD05013	Liu et al. 2013	9a	W_PRD	22.5233	113.184	1 = Radiocarbon	6640	270	7507	506	564	Dark grey cayey silt interbedded withsandy silt with locally molluscs	Bulk organic	Dark grey silty clay	Dark grey clayey silt with abundant plant remains	transgressive	23	12	1	drill core	0.05	estimated	0.05	0.025	0.01	0.5	0.46	0	0	0.5	0	0.1	0	0	0	nd	nd	-21.88	YSD	midpoint	0.849897	0.849897	-1.71549	0	0	-1.00939	-0.585915	-0.0285213	0.49061
PRD05014	Liu et al. 2013	9a	W_PRD	22.5233	113.184	1 = Radiocarbon	7925	195	8795	602	421	Dark grey cayey silt interbedded withsandy silt with locally molluscs	Bulk organic	Dark grey silty clay	Dark grey clayey silt with abundant plant remains	transgressive	24.5	10.5	1	drill core	0.05	estimated	0.05	0.025	0.01	0.5	0.49	0	0	0.5	0	0.1	0	0	0	nd	nd	-23.38	YSD	midpoint	0.866502	0.866502	-1.71549	0	0	-1.00939	-0.585915	-0.0285213	0.49061
PRD05015	Liu et al. 2013	9a	W_PRD	22.5233	113.184	1 = Radiocarbon	13380	220	16110	717	640	Dark grey clayey silt with abundant plant remains	Bulk organic	Dark grey cayey silt interbedded withsandy silt with locally molluscs	Mottled silty clay	transgressive	26.5	8.5	1	drill core	0.05	estimated	0.05	0.025	0.01	0.5	0.53	0	0	0.5	0	0.1	0	0	0	nd	nd	-25.38	YSD	midpoint	0.889733	0.889733	-1.71549	0	0	-1.00939	-0.585915	-0.0285213	0.49061
Zhan9603-1	Zhan et al. 1996	9a	W_PRD	22.097	113.532	1 = Radiocarbon	2490.68	102.093	1989	337	320	Beach ridge facies	Shell	nd	nd	regressive	nd	nd	1	outcrop	0.01	estimated	0.01	0.005	0.01	0	0	0	0	0.5	0	0.1	0	0	0	nd	nd	1.74	YSD	midpoint	0.510025	0.510025	-1.66095	0	0	-1.01545	-0.576825	-0.0307938	0.48455
KWG-42	Huang et al. 1982	9a	W_PRD	22.3	113.233	1 = Radiocarbon	6378.81	206.069	7260	395	469	Dark grey silty mud	Bulk organic	grey muddy silt	greyish yellow clayey silt	transgressive	16	4	1	drill core	0.1	estimated	0.1	0.05	0.01	0.15	0.32	0	0	0.5	0	0.1	0	0	0	nd	nd	-14.9	YSD	midpoint	0.622495	0.622495	-1.70586	0	0	-1.01046	-0.58431	-0.0289226	0.48954
Beta-291321	Zong et al 2013	9a	N_PRD	23.0875	112.934	1 = Radiocarbon	2250	40	2230	114	81	grey clay with organic rich bands	Plant fragment	Grey find sand	Grey clay with thin bands of silt	transgressive	3.99	nd	1	drill core	0.05	estimated	0.05	0.025	0.01	0.15	0.0798	0	0	0.5	0	0.1	0	0	0	nd	nd	0.41	YSD	midpoint	0.538138	0.538138	-1.4077	0	0	-0.851383	-0.585864	-0.0237938	0.518736
Beta-291322	Zong et al 2013	9a	N_PRD	23.0875	112.934	1 = Radiocarbon	2160	40	2150	158	147	grey clay with thin bands of silt	Plant fragment	Grey clay with organic rich bands	Yellow coarse sand	transgressive	4.61	nd	1	drill core	0.05	estimated	0.05	0.025	0.01	0.15	0.0922	0	0	0.5	0	0.1	0	0	0	nd	nd	-0.21	YSD	midpoint	0.540117	0.540117	-1.4077	0	0	-0.851383	-0.585864	-0.0237938	0.518736
Beta-291323	Zong et al 2013	9a	N_PRD	23.0875	112.934	1 = Radiocarbon	2560	30	2715	38	200	grey clay with thin bands of silt	Plant fragment	Grey clay with organic rich bands	Yellow coarse sand	transgressive	6.92	nd	1	drill core	0.05	estimated	0.05	0.025	0.01	0.15	0.1384	0	0	0.5	0	0.1	0	0	0	nd	nd	-2.52	YSD	midpoint	0.54989	0.54989	-1.4077	0	0	-0.851383	-0.585864	-0.0237938	0.518736
GC-482	Huang et al. 1982; Zong 2004	9a	W_PRD	22.7	113.2	1 = Radiocarbon	3090.68	157.553	2728	458	434	dark grey clayey silt with oyster species including Ostrea rivularis, Ostrea plicatula, Ostrea Gigas, Ostrea Talienwhanensis	Shell	yellow grey sandy clay	oyster layer	regressive	3.2	15	1	drill core	0.1	estimated	0.1	0.05	0.01	0.15	0.064	0	0	0.5	0	0.1	0	0	0	nd	nd	-2	YSD	midpoint	0.537769	0.537769	-2.26039	0	0	-1.00297	-0.591655	-0.00132603	0.622701
KWG-52	Huang et al. 1986	9a	W_PRD	22.3732	113.199	1 = Radiocarbon	12010.7	395.883	13411	1133	870	Shelly mud with oyster shells	Oyster shells	nd	nd	regressive	23.2	nd	1	drill core	0.1	estimated	0.1	0.05	0.01	0.15	0.464	0	0	0.5	0	0.1	0	0	0	nd	nd	-12.8	YSD	midpoint	0.707387	0.707387	-1.71033	0	0	-1.00996	-0.585056	-0.0287361	0.490037
KWG-901	Li et al 1991	9a	W_PRD	22.7886	113.15	1 = Radiocarbon	8770.68	148.064	9258	416	465	Silty clay with freshwater calm, brackish water diatoms	Shell	fine sand	fine sand	regressive	17	1.2	0	drill core	0.1	estimated	0.1	0.05	0.01	0.15	0.34	0	0	0.5	0	0.1	0	0	0	nd	nd	-16.3	YSD	midpoint	0.633009	0.633009	-2.02445	0	0	-0.935558	-0.578413	-0.00162697	0.593811
KWG-87	Huang et al. 1982; Li et al. 1982	9a	W_PRD	22.6484	113.142	1 = Radiocarbon	5180.68	148.064	5344	379	445	Shelly marine mud with fossil Meretrix lusoria	Shell	nd	nd	na	na	na	1	drill core	0.1	estimated	0.1	0.05	0.01	0.15	0.2	0	0	0.5	0	0.1	0	0	0	nd	nd	-1.4	YSD	midpoint	0.570175	0.570175	-2.24266	0	0	-0.997903	-0.590659	-0.00134865	0.62053
KWG-31	Huang et al. 1982; Zong 2004	9a	W_PRD	22.5	113	1 = Radiocarbon	2378.81	156.279	2441	320	437	Grey muddy silt with little pollen of Chenodiaceae	Bulk organic	yellow brown clayey silt	grey muddy silt	regressive	4.5	13.2	1	drill core	0.1	estimated	0.1	0.05	0.01	0.15	0.09	0	0	0.5	0	0.1	0	0	0	nd	nd	-3.4	YSD	midpoint	0.541479	0.541479	-1.71143	0	0	-1.00984	-0.585238	-0.0286904	0.490159
KWG-85	Huang et al. 1982; Zong 2004	9a	W_PRD	22.5	113	1 = Radiocarbon	2900.68	102.093	2502	299	350	Shelly mud with oyster shells	shell	tidalflat sediment	subtidal mud	regressive	2.5	1.5	1	excavation	0.1	estimated	0.1	0.05	0.01	0.15	0.05	0	0	0.5	0	0.1	0	0	0	nd	nd	-1.5	YSD	midpoint	0.536284	0.536284	-1.71143	0	0	-1.00984	-0.585238	-0.0286904	0.490159
KWG-88	Li et al. 1982; Li et al. 1991; Zong 2004	9a	W_PRD	22.5	113	1 = Radiocarbon	3701.28	110.422	4050	356	324	Saltmarsh peat	Peat	nd	nd	regressive	nd	nd	1	drill core	0.1	estimated	0.1	0.05	0.01	0.15	0.2	0	0	0.5	0	0.1	0	0	0	nd	nd	0.1	YSD	midpoint	0.570175	0.570175	-1.71143	0	0	-1.00984	-0.585238	-0.0286904	0.490159
TSDH	Huang et al. 1986	9b	W_PRD	22.0794	112.963	1 = Radiocarbon	8483.51	189.815	9469	651	462	Marine shelly mud with plant material	Plant	nd	nd	regressive	nd	nd	1	drill core	0.1	estimated	0.1	0.02	0.01	0.15	0.2	0	0	0.5	0	0.1	0	0	0	nd	nd	-12.5	YSD	midpoint	0.568331	0.568331	-2.55358	0	0	-1.12679	-0.663395	-0.0375	0.513395
KWG-104	Li et al. 1991; Zong 2004	9a	N_PRD	23.1167	113.267	1 = Radiocarbon	2710.68	97.7141	2261	366	331	Shelly mud with oyster shells	Shell	filled material	tidalflat mud	regressive	5	3.5	1	drill core	0.1	estimated	0.1	0.02	0.01	0.15	0.1	0	0	0.5	0	0.1	0	0	0	nd	nd	-5	YSD	midpoint	0.541295	0.541295	-1.3625	0	0	-0.77701	-0.555239	-0.00957547	0.512903
KWG-109	Li et al 1991; zong 2004	9a	N_PRD	23.1167	113.267	1 = Radiocarbon	2510.68	102.093	2013	326	326	mud with oyster shell	Shell	nd	nd	regressive	2.6	18	1	drill core	0.1	estimated	0.1	0.02	0.01	0.15	0.052	0	0	0.5	0	0.1	0	0	0	nd	nd	0.08	YSD	midpoint	0.534513	0.534513	-1.3625	0	0	-0.77701	-0.555239	-0.00957547	0.512903
GZ3927	Zong et al 2013	9a	N_PRD	23.101	113.234	1 = Radiocarbon	2455	103.846	2534	223	221	yellowish grey clay	Bulk organic	Filled material	Dark grey clay, with fragments of oyster	transgressive	5	nd	1	drill core	0.05	estimated	0.05	0.025	0.01	0.15	0.1	0	0	0.5	0	0.1	0	0	0	nd	nd	-1.5	YSD	midpoint	0.541503	0.541503	-1.34911	0	0	-0.754982	-0.546169	-0.00536429	0.511175
GZ3928	Zong et al 2013	9a	N_PRD	23.101	113.234	1 = Radiocarbon	2528	104.12	2583	258	236	dark grey clay with fragments of oyster shell and sea shell	Bulk organic	Filled material	Dark grey clay, with fragments of oyster	transgressive	7.8	nd	1	drill core	0.05	estimated	0.05	0.025	0.01	0.15	0.156	0	0	0.5	0	0.1	0	0	0	nd	nd	-4.3	YSD	midpoint	0.554582	0.554582	-1.34911	0	0	-0.754982	-0.546169	-0.00536429	0.511175
GZ3929	Zong et al 2013	9a	N_PRD	23.101	113.234	1 = Radiocarbon	6429	109.659	7339	229	305	dark grey clay with fragments of oyster shell and sea shell	Bulk organic	Yellowish grey clay	nd	transgressive	12	nd	1	drill core	0.05	estimated	0.05	0.025	0.01	0.15	0.24	0	0	0.5	0	0.1	0	0	0	nd	nd	-8.5	YSD	midpoint	0.583802	0.583802	-1.34911	0	0	-0.754982	-0.546169	-0.00536429	0.511175
ZK-526a	Li et al. 1991; Xiong et al. 2020	9a	N_PRD	23.0078	113.095	1 = Radiocarbon	5265.68	111.009	5445	318	372	shell mound	Shell	nd	nd	transgressive	2.5	nd	1	excavation	0.1	estimated	0.1	0.05	0.01	0.05	0	0	0	0.5	0	0.1	0	0	3.64	nd	nd	1.13	YSD	midpoint	3.67623	3.67623	-1.39041	0	0	-0.822935	-0.57415	-0.0183552	0.516505
ZK-526b	Li et al. 1991; Xiong et al. 2020	9a	N_PRD	23.0078	113.095	1 = Radiocarbon	5155.68	138.647	5316	353	432	shell mound	Shell	nd	nd	transgressive	2.5	nd	1	excavation	0.1	estimated	0.1	0.05	0.01	0.05	0	0	0	0.5	0	0.1	0	0	3.64	nd	nd	1.13	YSD	midpoint	3.67623	3.67623	-1.39041	0	0	-0.822935	-0.57415	-0.0183552	0.516505
ZK-527	Li et al. 1991; Xiong et al. 2020	9a	N_PRD	23.0078	113.095	1 = Radiocarbon	5160.68	111.009	5327	314	372	shell mound	Shell	nd	nd	transgressive	2.5	nd	1	excavation	0.1	estimated	0.1	0.05	0.01	0.05	0	0	0	0.5	0	0.1	0	0	3.64	nd	nd	1.13	YSD	midpoint	3.67623	3.67623	-1.39041	0	0	-0.822935	-0.57415	-0.0183552	0.516505
ZK-528	Li et al. 1991; Xiong et al. 2020	9a	N_PRD	23.0078	113.095	1 = Radiocarbon	5200.68	111.009	5373	321	368	shell mound	Shell	nd	nd	transgressive	2.5	nd	1	excavation	0.1	estimated	0.1	0.05	0.01	0.05	0	0	0	0.5	0	0.1	0	0	3.64	nd	nd	1.13	YSD	midpoint	3.67623	3.67623	-1.39041	0	0	-0.822935	-0.57415	-0.0183552	0.516505
ZK-547	Li et al. 1991; Xiong et al. 2020	9a	N_PRD	23.0078	113.095	1 = Radiocarbon	3890.68	111.009	4310	478	332	shell mound	human bone	nd	nd	transgressive	1.6	nd	1	excavation	0.1	estimated	0.1	0.05	0.01	0.05	0	0	0	0.5	0	0.1	0	0	3.64	nd	nd	2.03	YSD	midpoint	3.67623	3.67623	-1.39041	0	0	-0.822935	-0.57415	-0.0183552	0.516505
ZK-548	Li et al. 1991; Xiong et al. 2020	9a	N_PRD	23.0078	113.095	1 = Radiocarbon	4120.68	111.009	4640	231	344	shell mound	human bone	nd	nd	transgressive	1.6	nd	1	excavation	0.1	estimated	0.1	0.05	0.01	0.05	0	0	0	0.5	0	0.1	0	0	3.64	nd	nd	2.03	YSD	midpoint	3.67623	3.67623	-1.39041	0	0	-0.822935	-0.57415	-0.0183552	0.516505
KWG-29	Huang et al. 1982; Zhang et al. 1982; Wu 1985	9a	N_PRD	23.1523	113.094	1 = Radiocarbon	5030.68	284.118	5150	694	723	Brackish bivalve (Corbiculidae sp., Corbicala sp., Mactridae sp.) attached on tidal notch within a sea cave	shell	nd	nd	na	na	na	0	excavation	0.1	estimated	0.1	0.05	0.01	0.15	0.2	0	0	0.5	0	0.1	0	0	0	nd	nd	3.6	YSD	midpoint	0.570175	0.570175	-1.39758	0	0	-0.834728	-0.579006	-0.0206098	0.51743
KWG-57	Huang et al. 1982; Li et al. 1991; Zong 2004	9a	N_PRD	23.0333	113.017	1 = Radiocarbon	6538.81	197.394	7421	366	432	Dark grey peaty shelly muddy silty with marine shell species	Bulk organic	fill material	yellowish silty clay with pyrite	transgressive	3.9	0	1	drill core	0.1	estimated	0.1	0.05	0.01	0.15	0.078	0	0	0.5	0	0.1	0	0	0	nd	nd	-3.8	YSD	midpoint	0.539615	0.539615	-1.40618	0	0	-0.848873	-0.58483	-0.023314	0.518539
NHLJ1	Zeng 1981; Huang et al. 1986; Li et al. 1991	9a	N_PRD	22.8274	113	1 = Radiocarbon	7375.68	152.801	7676	339	348	Oyster shell layer	Oyster shells	nd	nd	regressive	13.9	nd	1	drill core	0.1	estimated	0.1	0.05	0.01	0.05	0	0	0	0.5	0	0.1	0	0	0	nd	nd	-0.2	YSD	midpoint	0.514879	0.514879	-1.43483	0	0	-0.896013	-0.60424	-0.0323259	0.522236
ZK-543	Xiong et al. 2020	9a	N_PRD	22.9549	112.97	1 = Radiocarbon	5295.68	111.009	5478	346	339	shell mound	Shell	nd	nd	transgressive	nd	nd	1	excavation	0.1	estimated	0.1	0.05	0.01	0.05	0	0	0	0.5	0	0.1	0	0	3.21	nd	nd	2.75	YSD	midpoint	3.25103	3.25103	-1.42033	0	0	-0.872148	-0.594414	-0.0277635	0.520365
ZK-544	Xiong et al. 2020	9a	N_PRD	22.9549	112.97	1 = Radiocarbon	5700.68	111.009	5917	307	322	shell mound	Shell	nd	nd	transgressive	nd	nd	1	excavation	0.1	estimated	0.1	0.05	0.01	0.05	0	0	0	0.5	0	0.1	0	0	3.21	nd	nd	2.75	YSD	midpoint	3.25103	3.25103	-1.42033	0	0	-0.872148	-0.594414	-0.0277635	0.520365
Huang8304	Huang et al. 1982; Li et al 1991	9a	N_PRD	22.92	112.96	1 = Radiocarbon	6255.68	106.527	6513	319	301	Shelly mud	Shell	nd	nd	regressive	3	20	1	drill core	0.1	estimated	0.1	0.05	0.01	0.15	0.06	0	0	0.5	0	0.1	0	0	0	nd	nd	-1.4	YSD	midpoint	0.537308	0.537308	-1.42535	0	0	-0.880419	-0.59782	-0.0293449	0.521013
GZ4141	Zong et al 2013	9a	N_PRD	23.0875	112.934	1 = Radiocarbon	2090	20	2048	66	52	grey silt with thin band of peat	Peat	Yellowish grey clay	Grey find sand	transgressive	1.82	nd	1	drill core	0.05	estimated	0.05	0.025	0.01	0.15	0.0364	0	0	0.5	0	0.1	0	0	0	nd	nd	2.58	YSD	midpoint	0.533432	0.533432	-1.42098	0	0	-0.873222	-0.594856	-0.0279689	0.520449
GZ4142	Zong et al 2013	9a	N_PRD	23.0875	112.934	1 = Radiocarbon	2210	25	2230	90	102	grey clay with organic rich bands	Plant fragment	Grey find sand	Grey clay with thin bands of silt	transgressive	3.54	nd	1	drill core	0.01	estimated	0.01	0.005	0.01	0.15	0.0708	0	0	0.5	0	0.1	0	0	0	nd	nd	0.86	YSD	midpoint	0.536319	0.536319	-1.42098	0	0	-0.873222	-0.594856	-0.0279689	0.520449
KWG-15	Li et al 1982; Zong 2004	9a	N_PRD	23.44	112.93	1 = Radiocarbon	2301.28	110.422	2323	382	316	Freshwater swamp	freshwater peat	nd	nd	regressive	nd	nd	1	drill core	0.1	estimated	0.1	0.05	0.01	0.05	0	0	0	0.5	0	0.1	0	0	0	nd	nd	0.3	YSD	midpoint	0.514879	0.514879	-1.45743	0	0	-0.933195	-0.619551	-0.0394343	0.525153
Beta-289664	Zong et al 2013	9a	N_PRD	23.1681	112.842	1 = Radiocarbon	7690	107.703	8489	282	282	dark grey clay with shell fragments in carious depth and plant roots	Bulk organic	Dark grey clay, with organic matter increasing from 4.10m upwards		transgressive	7.3	nd	1	drill core	0.05	estimated	0.05	0.025	0.01	0.15	0.146	0	0	0.5	0	0.1	0	0	0	nd	nd	-2.5	YSD	midpoint	0.551852	0.551852	-1.43595	0	0	-0.897856	-0.604999	-0.0326783	0.522381
Beta-201319	Zong et al. 2013; Xiong et al 2018	9a	N_PRD	23.1681	112.842	1 = Radiocarbon	4800	107.703	5517	336	214	dark grey clay with organic matter	Bulk organic	greenish to blackish grey clay with rich organic matter and large pieces of Glypstostrobus sp.	grey clay with shell fragments and plant roots	transgressive	2.96	13.02	1	drill core	0.05	estimated	0.05	0.025	0.01	0.15	0.0592	0	0	0.5	0	0.1	0	0	0	nd	nd	1.84	YSD	midpoint	0.535471	0.535471	-1.43595	0	0	-0.897857	-0.605	-0.0326785	0.522381
Beta-289665	Xiong et al 2018	9a	N_PRD	23.1681	112.842	1 = Radiocarbon	7480	107.703	8276	175	249	grey clay with shell fragments and plant roots	Plant fragment	dark grey clay with organic matter	brownish grey to blackish grey clayey silt with thin layers of peaty material	transgressive	9.83	6.15	1	drill core	0.01	estimated	0.01	0.005	0.01	0.15	0.1966	0	0	0.5	0	0.1	0	0	0	nd	nd	-5.03	YSD	midpoint	0.566813	0.566813	-1.43595	0	0	-0.897857	-0.605	-0.0326785	0.522381
Beta-290247	Zong et al. 2013; Xiong et al 2018	9a	N_PRD	23.1681	112.842	1 = Radiocarbon	6580	40	7479	87	53	grey clay with shell fragments and plant roots	Plant fragment	dark grey clay with organic matter	brownish grey to blackish grey clayey silt with thin layers of peaty material	transgressive	6.32	9.66	1	drill core	0.01	estimated	0.01	0.005	0.01	0.15	0.1264	0	0	0.5	0	0.1	0	0	0	nd	nd	-1.52	YSD	midpoint	0.546445	0.546445	-1.43595	0	0	-0.897857	-0.605	-0.0326785	0.522381
Beta-291320	Zong et al. 2013; Xiong et al 2018	9a	N_PRD	23.1681	112.842	1 = Radiocarbon	6460	50	7367	97	100	grey clay with shell fragments and plant roots	Plant fragment	dark grey clay with organic matter	brownish grey to blackish grey clayey silt with thin layers of peaty material	transgressive	6	9.98	1	drill core	0.01	estimated	0.01	0.005	0.01	0.15	0.12	0	0	0.5	0	0.1	0	0	0	nd	nd	-1.2	YSD	midpoint	0.545	0.545	-1.43595	0	0	-0.897857	-0.605	-0.0326785	0.522381
GZ3942	Xiong et al 2018	9a	N_PRD	23.1681	112.842	1 = Radiocarbon	7677	36	8460	82	62	grey clay with shell fragments and plant roots	Plant fragment	dark grey clay with organic matter	brownish grey to blackish grey clayey silt with thin layers of peaty material	transgressive	12.26	3.72	1	drill core	0.01	estimated	0.01	0.005	0.01	0.15	0.2452	0	0	0.5	0	0.1	0	0	0	nd	nd	-7.46	YSD	midpoint	0.585447	0.585447	-1.43595	0	0	-0.897857	-0.605	-0.0326785	0.522381
GZ3943	Xiong et al 2018	9a	N_PRD	23.1681	112.842	1 = Radiocarbon	7961	35	8836	153	189	grey clay with shell fragments and plant roots	Plant fragment	dark grey clay with organic matter	brownish grey to blackish grey clayey silt with thin layers of peaty material	transgressive	13.41	2.57	1	drill core	0.01	estimated	0.01	0.005	0.01	0.15	0.2682	0	0	0.5	0	0.1	0	0	0	nd	nd	-8.61	YSD	midpoint	0.595446	0.595446	-1.43595	0	0	-0.897857	-0.605	-0.0326785	0.522381
GZ3944	Xiong et al 2018	9a	N_PRD	23.1681	112.842	1 = Radiocarbon	8037	36	8900	122	172	grey clay with shell fragments and plant roots	Plant fragment	dark grey clay with organic matter	brownish grey to blackish grey clayey silt with thin layers of peaty material	transgressive	14.67	1.31	1	drill core	0.01	estimated	0.01	0.005	0.01	0.15	0.2934	0	0	0.5	0	0.1	0	0	0	nd	nd	-9.87	YSD	midpoint	0.607214	0.607214	-1.43595	0	0	-0.897857	-0.605	-0.0326785	0.522381
KWG-8	Huang et al. 1982a and b	9a	N_PRD	23.1833	112.8	1 = Radiocarbon	6265.36	331.128	7111	629	714	Dark grey muddy silt with peat	Peat material	dark grey silty mud	reddish yellow clayey silt	transgressive	7	0.8	1	drill core	0.1	estimated	0.1	0.05	0.01	0.15	0.14	0	0	0.5	0	0.1	0	0	0	nd	nd	-5.3	YSD	midpoint	0.551996	0.551996	-1.44042	0	0	-0.905207	-0.608026	-0.0340837	0.522957
Beta-456813	Fu et al. 2020	9a	N_PRD	23.205	112.742	1 = Radiocarbon	8280	30	9285	132	151	greyish white sandy silt with scattered rootlets and plant fragments.	Plant fragment	alternated beds of sand and mud with several peaty layers	dark grey un-weathered clayey silt with some plant fragments	regressive	18.18	9.32	1	drill core	0.01	estimated	0.01	0.005	0.01	0.05	0.3636	0	0	0.5	0	0.1	0	0	0	nd	nd	-14.44	YSD	midpoint	0.628355	0.628355	-1.44568	0	0	-0.913867	-0.611592	-0.0357393	0.523637
Beta-456815	Xiong et al 2018; Fu et al. 2020	9a	N_PRD	23.189	112.742	1 = Radiocarbon	8180	107.703	9147	308	370	dark grey clayey silt with plant roots an increased level of organic matter	Bulk organic	nd	greyish white clayey silt	transgressive	19.25	10.56	1	drill core	0.05	estimated	0.05	0.025	0.01	0.15	0.385	0	0	0.5	0	0.1	0	0	0	nd	nd	-15.65	YSD	midpoint	0.656849	0.656849	-1.445	0	0	-0.912749	-0.611132	-0.0355255	0.523549
Beta-456816	Xiong et al 2018; Fu et al. 2020	9a	N_PRD	23.189	112.742	1 = Radiocarbon	10200	30	11871	75	120	greyish white clayey silt	Plant fragment	dark grey clayey silt with plant roots an increased level of organic matter	yellowish to reddish grey sand and gravel	transgressive	23.71	5.5	1	drill core	0.01	estimated	0.01	0.005	0.01	0.15	0.4742	0	0	0.5	0	0.1	0	0	0	nd	nd	-20.72	YSD	midpoint	0.712384	0.712384	-1.445	0	0	-0.912749	-0.611132	-0.0355255	0.523549
Beta-456811	Xiong et al 2018; Fu et al. 2020	9a	N_PRD	23.2245	112.74	1 = Radiocarbon	8450	30	9483	47	49	dark grey clayey silt with plant roots an increased level of organic matter	Plant fragment	nd	greyish white clayey silt with a thin layer of peaty material	transgressive	23.47	2.13	1	drill core	0.01	estimated	0.01	0.005	0.01	0.15	0.4694	0	0	0.5	0	0.1	0	0	0	nd	nd	-19.05	YSD	midpoint	0.709198	0.709198	-1.44669	0	0	-0.915526	-0.612276	-0.0360565	0.523767
Beta-459975	Xiong et al 2018; Fu et al. 2020	9a	N_PRD	23.2245	112.74	1 = Radiocarbon	13030	116.619	15601	347	343	Soft to firm, greyish white, clayey silt	Bulk organic	Esturine sedimet	Bed rock	transgressive	25.38	0.43	1	drill core	0.05	estimated	0.05	0.025	0.01	0.15	0.5076	0	0	0.5	0	0.1	0	0	0	nd	nd	-20.96	YSD	midpoint	0.735447	0.735447	-1.44669	0	0	-0.915526	-0.612276	-0.0360565	0.523767
Beta-456814	Xiong et al 2018; Fu et al. 2020	9a	N_PRD	23.2245	112.74	1 = Radiocarbon	8390	50	9420	106	134	greyish white sandy silt with scattered rootlets and plant fragments.	Charcoal	alternated beds of sand and mud with several peaty layers	dark grey un-weathered clayey silt with some plant fragments	regressive	19.63	7.87	1	drill core	0.01	estimated	0.01	0.005	0.01	0.15	0.3926	0	0	0.5	0	0.1	0	0	0	nd	nd	-15.89	YSD	midpoint	0.660878	0.660878	-1.44669	0	0	-0.915526	-0.612275	-0.0360564	0.523767
Beta-470506	Fu et al. 2020	9a	N_PRD	23.2245	112.74	1 = Radiocarbon	940	30	849	72	66	dark grey clayey silt with intensive bioturbations	Plant material	greyish white sandy silt with scattered rootlets and plant fragments.	bedrock	regressive	3.3	18.2	1	drill core	0.01	estimated	0.01	0.005	0.01	0.15	0.066	0	0	0.5	0	0.1	0	0	0	nd	nd	1.12	YSD	midpoint	0.535706	0.535706	-1.44669	0	0	-0.915526	-0.612275	-0.0360564	0.523767
Beta-470507	Fu et al. 2020	9a	N_PRD	23.2245	112.74	1 = Radiocarbon	1250	30	1208	68	135	dark grey clayey silt with intensive bioturbations	Plant material	greyish white sandy silt with scattered rootlets and plant fragments.	bedrock	regressive	5.1	16.4	1	drill core	0.01	estimated	0.01	0.005	0.01	0.15	0.102	0	0	0.5	0	0.1	0	0	0	nd	nd	-0.68	YSD	midpoint	0.541322	0.541322	-1.44669	0	0	-0.915526	-0.612275	-0.0360564	0.523767
Beta-470508	Fu et al. 2020	9a	N_PRD	23.2245	112.74	1 = Radiocarbon	3660	30	3985	101	87	dark grey clayey silt with intensive bioturbations	Plant material	greyish white sandy silt with scattered rootlets and plant fragments.	bedrock	regressive	5.81	15.69	1	drill core	0.01	estimated	0.01	0.005	0.01	0.15	0.1162	0	0	0.5	0	0.1	0	0	0	nd	nd	-1.39	YSD	midpoint	0.544176	0.544176	-1.44669	0	0	-0.915526	-0.612275	-0.0360564	0.523767
Beta-470509	Fu et al. 2020	9a	N_PRD	23.2245	112.74	1 = Radiocarbon	4120	30	4651	165	124	dark grey clayey silt with intensive bioturbations	Plant material	greyish white sandy silt with scattered rootlets and plant fragments.	bedrock	regressive	6.67	14.83	1	drill core	0.01	estimated	0.01	0.005	0.01	0.15	0.1334	0	0	0.5	0	0.1	0	0	0	nd	nd	-2.25	YSD	midpoint	0.548106	0.548106	-1.44669	0	0	-0.915526	-0.612275	-0.0360564	0.523767
Beta-476470	Fu et al. 2020	9a	N_PRD	23.2245	112.74	1 = Radiocarbon	6080	30	6937	214	136	dark grey clayey silt with intensive bioturbations	Plant material	greyish white sandy silt with scattered rootlets and plant fragments.	bedrock	regressive	9.68	11.82	1	drill core	0.01	estimated	0.01	0.005	0.01	0.15	0.1936	0	0	0.5	0	0.1	0	0	0	nd	nd	-5.26	YSD	midpoint	0.565779	0.565779	-1.44669	0	0	-0.915526	-0.612275	-0.0360564	0.523767
Beta-476471	Fu et al. 2020	9a	N_PRD	23.2245	112.74	1 = Radiocarbon	7800	30	8572	66	107	dark grey clayey silt with intensive bioturbations	Plant material	greyish white sandy silt with scattered rootlets and plant fragments.	bedrock	regressive	16.33	5.17	1	drill core	0.01	estimated	0.01	0.005	0.01	0.15	0.3266	0	0	0.5	0	0.1	0	0	0	nd	nd	-11.91	YSD	midpoint	0.623933	0.623933	-1.44669	0	0	-0.915526	-0.612275	-0.0360564	0.523767
Beta-491057	Fu et al. 2020	9a	N_PRD	23.2245	112.74	1 = Radiocarbon	6780	104.403	7634	201	202	dark grey clayey silt with intensive bioturbations	Bulk organic	greyish white sandy silt with scattered rootlets and plant fragments.	bedrock	regressive	10.97	10.53	1	drill core	0.01	estimated	0.01	0.005	0.01	0.15	0.2194	0	0	0.5	0	0.1	0	0	0	nd	nd	-6.55	YSD	midpoint	0.575119	0.575119	-1.44669	0	0	-0.915526	-0.612275	-0.0360564	0.523767
Beta-470510	Fu et al. 2020	9a	N_PRD	23.1361	112.679	1 = Radiocarbon	250	30	296	131	295	grey to yellowish brown clayey silt with herbaceous roots	Plant fragment	na	grey clayey silt with herbaceous roots	regressive	3.15	nd	1	drill core	0.01	estimated	0.01	0.005	0.01	0.15	0.063	0	0	0.5	0	0.1	0	0	0	nd	nd	1.55	YSD	midpoint	0.535345	0.535345	-1.44765	0	0	-0.917102	-0.612925	-0.0363578	0.52389
Beta-470511	Fu et al. 2020	9a	N_PRD	23.1361	112.679	1 = Radiocarbon	940	30	849	72	66	grey clayey silt with herbaceous roots	Plant fragment	grey to yellowish brown clayey silt with herbaceous roots	light grey silt with some plant fragments	regressive	6.54	nd	1	drill core	0.01	estimated	0.01	0.005	0.01	0.15	0.1308	0	0	0.5	0	0.1	0	0	0	nd	nd	-1.84	YSD	midpoint	0.547479	0.547479	-1.44765	0	0	-0.917102	-0.612925	-0.0363578	0.52389
Beta-458420	Fu et al. 2020	9a	N_PRD	23.1361	112.679	1 = Radiocarbon	1620	30	1480	63	71	light grey silt with some plant fragments	Plant fragment	grey clayey sandy silt and blackish peaty sand with some plant fragments and shellsd	grey clayey silt with plentiful plant fragments and some bioturbations.	regressive	8.44	nd	1	drill core	0.01	estimated	0.01	0.005	0.01	0.15	0.1688	0	0	0.5	0	0.1	0	0	0	nd	nd	-3.74	YSD	midpoint	0.55778	0.55778	-1.44765	0	0	-0.917102	-0.612925	-0.0363578	0.52389
Beta-458421	Fu et al. 2020	9a	N_PRD	23.1361	112.679	1 = Radiocarbon	1770	30	1652	72	77	light grey silt with some plant fragments	Plant fragment	grey clayey sandy silt and blackish peaty sand with some plant fragments and shellsd	grey clayey silt with plentiful plant fragments and some bioturbations.	regressive	8.98	nd	1	drill core	0.01	estimated	0.01	0.005	0.01	0.15	0.1796	0	0	0.5	0	0.1	0	0	0	nd	nd	-4.28	YSD	midpoint	0.561143	0.561143	-1.44765	0	0	-0.917102	-0.612925	-0.0363578	0.52389
Beta-458422	Fu et al. 2020	9a	N_PRD	23.1361	112.679	1 = Radiocarbon	2140	30	2115	184	114	light grey silt with some plant fragments	Plant fragment	grey clayey sandy silt and blackish peaty sand with some plant fragments and shellsd	grey clayey silt with plentiful plant fragments and some bioturbations.	regressive	9.85	nd	1	drill core	0.01	estimated	0.01	0.005	0.01	0.15	0.197	0	0	0.5	0	0.1	0	0	0	nd	nd	-5.15	YSD	midpoint	0.566951	0.566951	-1.44765	0	0	-0.917102	-0.612925	-0.0363578	0.52389
Beta-470512	Fu et al. 2020	9a	N_PRD	23.1361	112.679	1 = Radiocarbon	2270	30	2241	104	84	light grey silt with some plant fragments	Plant fragment	grey clayey sandy silt and blackish peaty sand with some plant fragments and shellsd	grey clayey silt with plentiful plant fragments and some bioturbations.	regressive	10.51	nd	1	drill core	0.01	estimated	0.01	0.005	0.01	0.15	0.2102	0	0	0.5	0	0.1	0	0	0	nd	nd	-5.81	YSD	midpoint	0.571672	0.571672	-1.44765	0	0	-0.917102	-0.612925	-0.0363578	0.52389
Beta-470513	Fu et al. 2020	9a	N_PRD	23.1361	112.679	1 = Radiocarbon	7190	30	7993	38	53	dark grey clayey silt with plentiful plant fragments and some bioturbations.	Plant fragment	light grey silt with some plant fragments	mottled red weathered clay	regressive	10.78	nd	1	drill core	0.01	estimated	0.01	0.005	0.01	0.15	0.2156	0	0	0.5	0	0.1	0	0	0	nd	nd	-6.08	YSD	midpoint	0.57368	0.57368	-1.44765	0	0	-0.917102	-0.612925	-0.0363578	0.52389
Beta-470514	Fu et al. 2020	9a	N_PRD	23.1361	112.679	1 = Radiocarbon	7670	30	8449	89	47	dark grey clayey silt with plentiful plant fragments and some bioturbations.	Plant fragment	light grey silt with some plant fragments	mottled red weathered clay	transgressive	11.75	nd	1	drill core	0.01	estimated	0.01	0.005	0.01	0.15	0.235	0	0	0.5	0	0.1	0	0	0	nd	nd	-7.05	YSD	midpoint	0.581249	0.581249	-1.44765	0	0	-0.917102	-0.612925	-0.0363578	0.52389
Beta-458423	Fu et al. 2020	9a	N_PRD	23.1361	112.679	1 = Radiocarbon	7930	30	8760	222	154	dark grey clayey silt with plentiful plant fragments and some bioturbations.	Plant fragment	light grey silt with some plant fragments	mottled red weathered clay	transgressive	12	nd	1	drill core	0.01	estimated	0.01	0.005	0.01	0.15	0.24	0	0	0.5	0	0.1	0	0	0	nd	nd	-7.3	YSD	midpoint	0.583288	0.583288	-1.44765	0	0	-0.917102	-0.612925	-0.0363578	0.52389
Beta-494998	Fu et al. 2020	9a	N_PRD	23.1478	112.678	1 = Radiocarbon	5870	40	6694	94	130	blackish clayey silt with high organic content	Plant fragment	ngrey clayey silt with herbaceous rootsd	dark grey sandy silt	regressive	3.48	nd	1	drill core	0.01	estimated	0.01	0.005	0.01	0.15	0.0696	0	0	0.5	0	0.1	0	0	0	nd	nd	0.16	YSD	midpoint	0.536162	0.536162	-1.44796	0	0	-0.917611	-0.613134	-0.0364551	0.52393
Beta-494999	Fu et al. 2020	9a	N_PRD	23.1478	112.678	1 = Radiocarbon	7420	30	8262	70	82	Dark grey sandy silt	Plant fragment	blackish clayey silt with high organic content	mottled red weathered clay	regressive	7.87	nd	1	drill core	0.01	estimated	0.01	0.005	0.01	0.15	0.1574	0	0	0.5	0	0.1	0	0	0	nd	nd	-4.23	YSD	midpoint	0.554436	0.554436	-1.44796	0	0	-0.917611	-0.613134	-0.0364551	0.52393
GZ773	Ding et al 2007; Zong et al. 2013	9a	N_PRD	23.2604	112.39	1 = Radiocarbon	2634	32	2753	88	29	Dark brownish grey organic matter with large amount of roots and plant fragments of Glyptostrobus pensilis.	Plant fragment	Dark grey silt and clay, becoming lighter grey upwards	Grey to light grey clay	transgressive	2.01	nd	1	drill core	0.04	estimated	0.04	0.02	0.01	0.15	0.0402	0	0	0.5	0	0.1	0	0	0	nd	nd	7.99	YSD	midpoint	0.533494	0.533494	-1.46273	0	0	-0.941908	-0.623138	-0.0411	0.525836
GZ774	Ding et al 2007; Zong et al. 2013	9a	N_PRD	23.2604	112.39	1 = Radiocarbon	3305	29	3520	56	67	Dark brownish grey organic matter with large amount of roots and plant fragments of Glyptostrobus pensilis.	Plant fragment	Dark grey silt and clay, becoming lighter grey upwards	Grey to light grey clay	transgressive	2.21	nd	1	drill core	0.05	estimated	0.05	0.025	0.01	0.15	0.0442	0	0	0.5	0	0.1	0	0	0	nd	nd	7.79	YSD	midpoint	0.534021	0.534021	-1.46273	0	0	-0.941908	-0.623138	-0.0411	0.525836
GZ775	Ding et al 2007; Zong et al. 2013	9a	N_PRD	23.2604	112.39	1 = Radiocarbon	3375	45	3608	205	126	Dark brownish grey organic matter with large amount of roots and plant fragments of Glyptostrobus pensilis.	Plant fragment	Dark grey silt and clay, becoming lighter grey upwards	Grey to light grey clay	transgressive	2.41	nd	1	drill core	0.05	estimated	0.05	0.025	0.01	0.15	0.0482	0	0	0.5	0	0.1	0	0	0	nd	nd	7.59	YSD	midpoint	0.534367	0.534367	-1.46273	0	0	-0.941908	-0.623138	-0.0411	0.525836
GZ777	Ding et al 2007; Zong et al. 2013	9a	N_PRD	23.2604	112.39	1 = Radiocarbon	3456	28	3721	108	83	Dark brownish grey organic matter with large amount of roots and plant fragments of Glyptostrobus pensilis.	Plant fragment	Dark grey silt and clay, becoming lighter grey upwards	Grey to light grey clay	transgressive	2.81	nd	1	drill core	0.05	estimated	0.05	0.025	0.01	0.15	0.0562	0	0	0.5	0	0.1	0	0	0	nd	nd	7.19	YSD	midpoint	0.535148	0.535148	-1.46273	0	0	-0.941908	-0.623138	-0.0411	0.525836
GZ779	Ding et al 2007; Zong et al. 2013	9a	N_PRD	23.2604	112.39	1 = Radiocarbon	3537	30	3820	82	121	Dark brownish grey organic matter with large amount of roots and plant fragments of Glyptostrobus pensilis.	Plant fragment	Dark grey silt and clay, becoming lighter grey upwards	Grey to light grey clay	transgressive	3.21	nd	1	drill core	0.05	estimated	0.05	0.025	0.01	0.15	0.0642	0	0	0.5	0	0.1	0	0	0	nd	nd	6.79	YSD	midpoint	0.536047	0.536047	-1.46273	0	0	-0.941908	-0.623138	-0.0411	0.525836
GZ781	Ding et al 2007; Zong et al. 2013	9a	N_PRD	23.2604	112.39	1 = Radiocarbon	3642	30	3956	127	106	Dark brownish grey organic matter with large amount of roots and plant fragments of Glyptostrobus pensilis.	Plant fragment	Dark grey silt and clay, becoming lighter grey upwards	Grey to light grey clay	transgressive	3.61	nd	1	drill core	0.05	estimated	0.05	0.025	0.01	0.15	0.0722	0	0	0.5	0	0.1	0	0	0	nd	nd	6.39	YSD	midpoint	0.537064	0.537064	-1.46273	0	0	-0.941908	-0.623138	-0.0411	0.525836
GZ783	Ding et al 2007; Zong et al. 2013	9a	N_PRD	23.2604	112.39	1 = Radiocarbon	3665	30	3994	93	94	Dark brownish grey organic matter with large amount of roots and plant fragments of Glyptostrobus pensilis.	Plant fragment	Dark grey silt and clay, becoming lighter grey upwards	Grey to light grey clay	transgressive	4.01	nd	1	drill core	0.05	estimated	0.05	0.025	0.01	0.15	0.0802	0	0	0.5	0	0.1	0	0	0	nd	nd	5.99	YSD	midpoint	0.538198	0.538198	-1.46273	0	0	-0.941908	-0.623138	-0.0411	0.525836
GZ785	Ding et al 2007; Zong et al. 2013	9a	N_PRD	23.2604	112.39	1 = Radiocarbon	3813	31	4200	153	110	Dark brownish grey organic matter with large amount of roots and plant fragments of Glyptostrobus pensilis.	Plant fragment	Dark grey silt and clay, becoming lighter grey upwards	Grey to light grey clay	transgressive	4.41	nd	1	drill core	0.05	estimated	0.05	0.025	0.01	0.15	0.0882	0	0	0.5	0	0.1	0	0	0	nd	nd	5.59	YSD	midpoint	0.539448	0.539448	-1.46273	0	0	-0.941908	-0.623138	-0.0411	0.525836
GZ787	Ding et al 2007; Zong et al. 2013	9a	N_PRD	23.2604	112.39	1 = Radiocarbon	4544	33	5161	156	110	Dark brownish grey organic matter with large amount of roots and plant fragments of Glyptostrobus pensilis.	Plant fragment	Dark grey silt and clay, becoming lighter grey upwards	Grey to light grey clay	transgressive	4.81	nd	1	drill core	0.05	estimated	0.05	0.025	0.01	0.15	0.0962	0	0	0.5	0	0.1	0	0	0	nd	nd	5.19	YSD	midpoint	0.540814	0.540814	-1.46273	0	0	-0.941908	-0.623138	-0.0411	0.525836
[truncated: 32 more columns]

## Sheet: Short-form
Unique sample ID	Reference	Region code	Sub-region	Latitude	Longitude	Dating method	Corrected age (14C a BP)	Corrected age uncertainty (14C a)	Age (cal a BP)	Age 2σ Uncertainty + (cal a)	Age 2σ Uncertainty - (cal a)	Tendency	Sample depth/overburden thickness (m)	Depth to consolidated substrate (m)	Intercalated	Sample elevation (m)	Elevation datum (m)	Sample elevation uncertainty + (m)	Sample elevation uncertainty - (m)	Type	Primary indicator type	Secondary indicator type	Supporting evidence	Sample indicative meaning	RSL (m)	RSL 2σ Uncertainty + (m)	RSL 2σ Uncertainty - (m)	Corrected RSL (m)	Corrected RSL uncertainty + (m)	Corrected RSL uncertainty - (m)	Correction type	Reject	Why reject?	Notes
1	2	3	4	5	6	7	8	9	10	11	12	16	17	18	19	38a	38b	40	41	52	53	54	55	56	68	69	70	71	72	73	74	75	76	77
LFA27	Huang et al. 1986	9a	Hong Kong	22.8879	115.67	1 = Radiocarbon	8720.68	203.035	9192	544	605	regressive	24.9	nd	1	-17.8	YSD	0.73014	0.73014	-1	5 = Sedimentary (e.g., deltaic, estuarine, wetland, lacustrine, marine facies)	Subtidal deposit	Shell-bearing muddy sediment (author interpretation only)	<MTL	-17.8027	0.73185	0.73185	nd	nd	nd	nd	0	0	#REF!
MF-ML	Huang et al. 1986	9a	Hong Kong	22.8258	115.187	1 = Radiocarbon	4370.68	182.614	4333	515	526	transgressive	2.82	nd	1	3	YSD	0.536918	0.536918	1	5 = Sedimentary (e.g., deltaic, estuarine, wetland, lacustrine, marine facies)	Shell ridge	author interpretation only	>MLLW	3.52165	0.669538	0.669538	nd	nd	nd	nd	0	0	#REF!
HDBSS	Huang et al. 1986	9a	Hong Kong	22.7459	114.758	1 = Radiocarbon	1861.28	141.75	1779	342	365	transgressive	4.57	nd	1	1.5	YSD	0.541714	0.541714	-1	5 = Sedimentary (e.g., deltaic, estuarine, wetland, lacustrine, marine facies)	Lagoon deposit	Rotten wood and muddy sediment (Author interpretation)	<HAT	0.306753	0.570836	0.570836	nd	nd	nd	nd	0	0	#REF!
Huang8301	Huang et al. 1983; Huang et al. 1986	9a	Hong Kong	22.45	114.5	1 = Radiocarbon	2560.68	97.7141	2075	311	344	regressive	0	nd	1	1.5	YSD	0.512445	0.512445	0	5 = Sedimentary (e.g., deltaic, estuarine, wetland, lacustrine, marine facies)	Beach deposit	sedimentary structure and grain size	HAT-LAT	1.45	1.29933	1.29933	nd	nd	nd	nd	0	0	#REF!
KWG-1056	Huang et al. 1983; Huang et al. 1986	9a	Hong Kong	22.45	114.5	1 = Radiocarbon	3750.68	129.318	3535	404	387	regressive	5.66	4.62	1	-4.4	YSD	0.545815	0.545815	-1	5 = Sedimentary (e.g., deltaic, estuarine, wetland, lacustrine, marine facies)	Subtidal deposit	sediment texture, mollusc fossil	<MTL	-4.4244	0.548101	0.548101	nd	nd	nd	nd	0	0	#REF!
KWG-1057	Huang et al. 1983; Huang et al. 1986	9a	Hong Kong	22.45	114.5	1 = Radiocarbon	4368.81	172.234	4331	493	499	transgressive	8	nd	1	-7	YSD	0.557405	0.557405	-1	5 = Sedimentary (e.g., deltaic, estuarine, wetland, lacustrine, marine facies)	Subtidal deposit	sediment texture	<MTL	-7.0244	0.559643	0.559643	nd	nd	nd	nd	0	0	#REF!
KWG-252	Huang et al. 1983; Li et al. 1991; Zong 2004	9a	Hong Kong	22.45	114.5	1 = Radiocarbon	3888.81	148.878	4310	503	407	transgressive	4.4	nd	1	-5.6	YSD	0.541151	0.541151	-1	5 = Sedimentary (e.g., deltaic, estuarine, wetland, lacustrine, marine facies)	Subtidal deposit	sediment texture	<MTL	-5.6244	0.543456	0.543456	nd	nd	nd	nd	0	0	#REF!
OxA-5400	Davis 1999; Fyfe et al 1999	9a	Hong Kong	22.1526	114.449	1 = Radiocarbon	2025	65	1441	255	218	transgressive	7.05	>53.2	1	-35.88	YSD	0.550005	0.550005	-1	5 = Sedimentary (e.g., deltaic, estuarine, wetland, lacustrine, marine facies)	Marine deposit	sediment texture, grain size, diatom and foraminifera assemblage	<MTL	-35.9654	0.552273	0.552273	nd	nd	nd	nd	0	0	#REF!
OxA-5401	Davis 1999; Fyfe et al 1999	9a	Hong Kong	22.1526	114.449	1 = Radiocarbon	3575	60	3314	263	276	transgressive	8.55	>51.7	1	-37.38	YSD	0.55845	0.55845	-1	5 = Sedimentary (e.g., deltaic, estuarine, wetland, lacustrine, marine facies)	Marine deposit	sediment texture, grain size, diatom and foraminifera assemblage	<MTL	-37.4654	0.560684	0.560684	nd	nd	nd	nd	0	0	#REF!
OxA-5402	Davis 1999; Fyfe et al 1999	9a	Hong Kong	22.1526	114.449	1 = Radiocarbon	4870	75	4983	307	290	transgressive	12.05	>48.2	1	-40.88	YSD	0.5837	0.5837	-1	5 = Sedimentary (e.g., deltaic, estuarine, wetland, lacustrine, marine facies)	Marine deposit	sediment texture, grain size, diatom and foraminifera assemblage	<MTL	-40.9654	0.585838	0.585838	nd	nd	nd	nd	0	0	#REF!
Owen98A	Owen et al 1998	9a	Hong Kong	22.218	114.382	1 = Radiocarbon	4520.68	441.719	4513	1069	1119	transgressive	5.6	>75	1	-36.58	YSD	0.543295	0.543295	-1	5 = Sedimentary (e.g., deltaic, estuarine, wetland, lacustrine, marine facies)	Marine deposit	sediment texture and diatom assemblage	<MTL	-36.6699	0.545591	0.545591	nd	nd	nd	nd	0	0	#REF!
KWG-286	Yim 1984	9a	Hong Kong	22.3623	114.374	1 = Radiocarbon	5913.95	182.308	6750	415	435	transgressive	6.08	19.95	1	-12.88	YSD	0.547619	0.547619	-1	5 = Sedimentary (e.g., deltaic, estuarine, wetland, lacustrine, marine facies)	Intertidal deposit	Sediment description, mollusc fossil	<HAT	-14.0517	0.576443	0.576443	nd	nd	nd	nd	0	0	#REF!
HAR-868	Kendall 1976	9a	Hong Kong	22.3739	114.34	1 = Radiocarbon	6595.45	104.098	7486	178	174	transgressive	12.63	9.87	1	-17.01	YSD	0.590683	0.590683	0	5 = Sedimentary (e.g., deltaic, estuarine, wetland, lacustrine, marine facies)	Mangrove deposit	sediment texture, leave fragments, mollusc fossil	HAT-MTL	-17.5765	0.960944	0.960944	nd	nd	nd	nd	1	0	#REF!
HAR-869	Kendall 1976	9a	Hong Kong	22.3739	114.34	1 = Radiocarbon	7760.64	142.956	8580	417	252	transgressive	14.03	8.97	1	-17.91	YSD	0.603188	0.603188	0	5 = Sedimentary (e.g., deltaic, estuarine, wetland, lacustrine, marine facies)	Mangrove deposit	sediment texture, leave fragments, mollusc fossil	HAT-MTL	-18.4765	0.889252	0.889252	nd	nd	nd	nd	0	0	#REF!
HAR-870	Kendall 1976	9a	Hong Kong	22.3739	114.34	1 = Radiocarbon	8180.68	448.013	8574	1049	1015	transgressive	12.63	9.87	1	-17.01	YSD	0.590683	0.590683	0	5 = Sedimentary (e.g., deltaic, estuarine, wetland, lacustrine, marine facies)	Mangrove deposit	sediment texture, leave fragments, mollusc fossil	HAT-MTL	-17.5765	0.880818	0.880818	nd	nd	nd	nd	0	0	#REF!
HAR-871	Kendall 1976	9a	Hong Kong	22.3739	114.34	1 = Radiocarbon	8289.76	432.192	8696	1033	1014	transgressive	14.43	8.57	1	-18.31	YSD	0.606951	0.606951	0	5 = Sedimentary (e.g., deltaic, estuarine, wetland, lacustrine, marine facies)	Mangrove deposit	sediment texture, leave fragments, mollusc fossil	HAT-MTL	-18.8765	0.895878	0.895878	nd	nd	nd	nd	0	0	#REF!
CS-619	Strange and Shaw 1986; Yim 1999	9a	Hong Kong	22.301	114.26	1 = Radiocarbon	8470.68	457.729	8906	1178	1044	transgressive	11.6	20.1	1	-19.7	YSD	0.610286	0.610286	-1	5 = Sedimentary (e.g., deltaic, estuarine, wetland, lacustrine, marine facies)	Marine deposit	sediment texture, pollen, ostracod and foraminifera assemblage	<MTL	-19.7234	0.629435	0.629435	nd	nd	nd	nd	0	0	#REF!
ANU-76214	Yu et al. 2025	9a	Hong Kong	22.2456	114.246	1 = Radiocarbon	4217	33	4135	258	251	nd	nd	nd	0	2.727	YSD	0.183098	0.183098	0	3 = Fixed biological indicators	intertidal rocky shore	Saccostrea cucullata fossil	MHHW-MLLW	2.63824	0.537222	0.537222	nd	nd	nd	nd	0	0	#REF!
ANU-76216	Yu et al. 2025	9a	Hong Kong	22.2456	114.246	1 = Radiocarbon	3827	27	3621	235	230	nd	nd	nd	0	2.344	YSD	0.183098	0.183098	0	3 = Fixed biological indicators	intertidal rocky shore	Saccostrea cucullata fossil	MHHW-MLLW	2.25524	0.538524	0.538524	nd	nd	nd	nd	0	0	#REF!
YASIC-66120.1.1	Yu et al. 2025	9a	Hong Kong	22.2456	114.246	1 = Radiocarbon	3489	19	3214	217	235	nd	nd	nd	0	2.076	YSD	0.183098	0.183098	0	3 = Fixed biological indicators	intertidal rocky shore	Saccostrea cucullata fossil	MHHW-MLLW	1.98724	0.538524	0.538524	nd	nd	nd	nd	0	0	#REF!
YASIC-66121.1.1	Yu et al. 2025	9a	Hong Kong	22.2456	114.246	1 = Radiocarbon	4960	21	5090	216	242	nd	nd	nd	0	2.293	YSD	0.183098	0.183098	0	3 = Fixed biological indicators	intertidal rocky shore	Saccostrea cucullata fossil	MHHW-MLLW	2.20424	0.538241	0.538241	nd	nd	nd	nd	0	0	#REF!
YASIC-66122.1.1	Yu et al. 2025	9a	Hong Kong	22.2456	114.246	1 = Radiocarbon	4975	23	5108	211	257	nd	nd	nd	0	2.365	YSD	0.183098	0.183098	0	3 = Fixed biological indicators	intertidal rocky shore	Saccostrea cucullata fossil	MHHW-MLLW	2.27624	0.538241	0.538241	nd	nd	nd	nd	0	0	#REF!
YASIC-66123.1.1	Yu et al. 2025	9a	Hong Kong	22.2456	114.246	1 = Radiocarbon	5110	24	5277	230	259	nd	nd	nd	0	2.831	YSD	0.183098	0.183098	0	3 = Fixed biological indicators	intertidal rocky shore	Saccostrea cucullata fossil	MHHW-MLLW	2.74224	0.538241	0.538241	nd	nd	nd	nd	0	0	#REF!
Beta-145816	Davis et al 2000	9a	Hong Kong	22.2456	114.246	1 = Radiocarbon	5140	50	5313	242	272	nd	nd	nd	0	2.8	YSD	1.25429	1.25429	0	3 = Fixed biological indicators	intertidal rocky shore	Saccostrea cucullata fossil	MHHW-MLLW	2.71124	1.35256	1.35256	nd	nd	nd	nd	0	0	#REF!
GF9379	Lai and Shaw 1996	9a	Hong Kong	22.4642	114.208	1 = Radiocarbon	626.47	121.279	605	186	275	nd	nd	nd	1	-1.38	YSD	0.568529	0.568529	-1	5 = Sedimentary (e.g., deltaic, estuarine, wetland, lacustrine, marine facies)	Tidal flat deposit	sediment color, texture	<HAT	-2.72409	0.596343	0.596343	nd	nd	nd	nd	0	0	#REF!
GF9380	Lai and Shaw 1996	9a	Hong Kong	22.4642	114.208	1 = Radiocarbon	1000.68	441.719	523	702	522	nd	nd	nd	1	-1.38	YSD	0.568001	0.568001	-1	5 = Sedimentary (e.g., deltaic, estuarine, wetland, lacustrine, marine facies)	Tidal flat deposit	sediment color, texture	<HAT	-2.72409	0.59584	0.59584	nd	nd	nd	nd	0	0	#REF!
I-8830	Bard 1975	9a	Hong Kong	22.217	114.202	1 = Radiocarbon	5388.95	111.371	6161	232	231	transgressive	0.46	nd	1	0.32	YSD	0.534027	0.534027	1	5 = Sedimentary (e.g., deltaic, estuarine, wetland, lacustrine, marine facies)	Fluvial deposit	sediment color, texture and grain size	>MTL	0.288257	0.536362	0.536362	nd	nd	nd	nd	0	0	#REF!
GIF-4813	Meacham 1980	9a	Hong Kong	22.3193	114.169	1 = Radiocarbon	7411	467.135	7727	1059	1042	nd	nd	nd	1	-11.88	YSD	0.568001	0.568001	-1	5 = Sedimentary (e.g., deltaic, estuarine, wetland, lacustrine, marine facies)	Marine deposit	sediment texture	<MTL	-11.9204	0.570197	0.570197	nd	nd	nd	nd	0	0	#REF!
GIF-4558	Meacham 1979a	9a	Hong Kong	22.3251	114.168	1 = Radiocarbon	6970.68	457.729	7257	959	989	nd	nd	nd	1	-11.88	YSD	0.568001	0.568001	-1	5 = Sedimentary (e.g., deltaic, estuarine, wetland, lacustrine, marine facies)	Tidal flat deposit	sediment texture	<HAT	-13.2063	0.59584	0.59584	nd	nd	nd	nd	0	0	#REF!
OxA-5406	Davis 1999; Fyfe et al 1999	9a	Hong Kong	22.1628	114.165	1 = Radiocarbon	825	65	296	201	239	transgressive	0	>60	1	-23.68	YSD	0.531625	0.531625	-1	5 = Sedimentary (e.g., deltaic, estuarine, wetland, lacustrine, marine facies)	Marine deposit	sediment texture, grain size, diatom and foraminifera assemblage	<MTL	-23.6812	0.533971	0.533971	nd	nd	nd	nd	0	0	#REF!
OxA-5407	Davis 1999; Fyfe et al 1999	9a	Hong Kong	22.1628	114.165	1 = Radiocarbon	3935	65	3760	295	284	transgressive	2.7	>57.2	1	-26.38	YSD	0.53436	0.53436	-1	5 = Sedimentary (e.g., deltaic, estuarine, wetland, lacustrine, marine facies)	Marine deposit	sediment texture, grain size, diatom and foraminifera assemblage	<MTL	-26.3812	0.536695	0.536695	nd	nd	nd	nd	0	0	#REF!
OxA-5408	Davis 1999; Fyfe et al 1999	9a	Hong Kong	22.1628	114.165	1 = Radiocarbon	5425	85	5621	270	280	transgressive	4.2	>55.7	1	-27.88	YSD	0.53822	0.53822	-1	5 = Sedimentary (e.g., deltaic, estuarine, wetland, lacustrine, marine facies)	Marine deposit	sediment texture, grain size, diatom and foraminifera assemblage	<MTL	-27.8812	0.540538	0.540538	nd	nd	nd	nd	0	0	#REF!
OxA-5409	Davis 1999; Fyfe et al 1999	9a	Hong Kong	22.1628	114.165	1 = Radiocarbon	8920	90	9438	331	327	transgressive	7.2	>52.7	1	-30.88	YSD	0.550782	0.550782	-1	5 = Sedimentary (e.g., deltaic, estuarine, wetland, lacustrine, marine facies)	Marine deposit	sediment texture, grain size, diatom and foraminifera assemblage	<MTL	-30.8812	0.553047	0.553047	nd	nd	nd	nd	0	0	#REF!
OxA-5410	Davis 1999; Fyfe et al 1999	9a	Hong Kong	22.1628	114.165	1 = Radiocarbon	9310	80	9941	286	351	transgressive	11.2	>48.7	1	-34.88	YSD	0.576889	0.576889	0	5 = Sedimentary (e.g., deltaic, estuarine, wetland, lacustrine, marine facies)	Intertidal deposit	Sediment texture, grain size, diatom and foraminifera assemblage	HAT-LAT	-34.9062	1.39129	1.39129	nd	nd	nd	nd	0	0	#REF!
GIF-4387	Meacham 1979a	9a	Hong Kong	22.2796	114.165	1 = Radiocarbon	6453.95	135.198	7355	227	336	nd	nd	nd	1	-8.18	YSD	0.570175	0.570175	-1	5 = Sedimentary (e.g., deltaic, estuarine, wetland, lacustrine, marine facies)	Intertidal deposit	Sedimentary description	<HAT	-9.48715	0.597913	0.597913	nd	nd	nd	nd	0	0	#REF!
KWG-406	Howat 1985	9a	Hong Kong	22.286	114.151	1 = Radiocarbon	8465.53	288.21	9452	747	800	transgressive	18.5	0	0	-17.38	YSD	0.649615	0.649615	1	5 = Sedimentary (e.g., deltaic, estuarine, wetland, lacustrine, marine facies)	Colluvium	Sediment texture, grain size, diatom and foraminifera assemblage	>MTL	-17.4222	0.651537	0.651537	nd	nd	nd	nd	1	0	#REF!
KWG-407	Howat 1985	9a	Hong Kong	22.286	114.151	1 = Radiocarbon	8533.95	270.306	9550	690	770	transgressive	18.5	0	0	-17.38	YSD	0.649615	0.649615	1	5 = Sedimentary (e.g., deltaic, estuarine, wetland, lacustrine, marine facies)	Colluvium	Sediment texture, grain size, diatom and foraminifera assemblage	>MTL	-17.4222	0.651537	0.651537	nd	nd	nd	nd	1	0	#REF!
I-8269	Meacham 1975	9a	Hong Kong	22.337	114.147	1 = Radiocarbon	8718.95	128.302	9766	401	238	transgressive	15.1	1.1	1	-14.98	YSD	0.613436	0.613436	1	5 = Sedimentary (e.g., deltaic, estuarine, wetland, lacustrine, marine facies)	Fluvial deposit	sediment color, texture and grain size	>MTL	-14.9682	0.615471	0.615471	nd	nd	nd	nd	0	0	#REF!
GIF-5243	Meacham1982	9a	Hong Kong	22.337	114.147	1 = Radiocarbon	8360.68	463.805	8781	1142	1080	transgressive	nd	nd	1	-17.88	YSD	0.570175	0.570175	-1	5 = Sedimentary (e.g., deltaic, estuarine, wetland, lacustrine, marine facies)	Marine deposit	sediment color, texture and grain size	<MTL	-17.8682	0.572364	0.572364	nd	nd	nd	nd	0	0	#REF!
I-10059	Meacham 1978	9a	Hong Kong	22.1922	114.138	1 = Radiocarbon	5910.68	452.455	6140	1029	1026	transgressive	4	nd	1	-2.28	YSD	0.965091	0.965091	0	5 = Sedimentary (e.g., deltaic, estuarine, wetland, lacustrine, marine facies)	Tidal flat deposit	sediment texture, mollusc fossil	HAT-LAT	-2.30293	1.58777	1.58777	nd	nd	nd	nd	0	0	#REF!
HAR-3586	Meacham 1980	9a	Hong Kong	22.1922	114.138	1 = Radiocarbon	3750.68	446.112	3553	1160	1129	0	1.4	nd	1	0.22	YSD	0.667671	0.667671	0	5 = Sedimentary (e.g., deltaic, estuarine, wetland, lacustrine, marine facies)	Mangrove deposit	sediment texture, leave fragments, mollusc fossil	HAT-MTL	-0.401892	0.926515	0.926515	nd	nd	nd	nd	0	0	#REF!
Si86-123	Langford 1989	9a	Hong Kong	22.5029	114.083	1 = Radiocarbon	5440.36	157.388	6215	405	315	nd	nd	nd	1	-0.48	YSD	0.275681	0.275681	-1	5 = Sedimentary (e.g., deltaic, estuarine, wetland, lacustrine, marine facies)	Tidal flat deposit	sediment color, texture	<HAT	-2.02079	0.329242	0.329242	nd	nd	nd	nd	0	0	#REF!
SI86-124	Langford 1989	9a	Hong Kong	22.5029	114.083	1 = Radiocarbon	5058.36	132.838	5803	377	317	nd	nd	nd	1	-0.58	YSD	0.275681	0.275681	-1	5 = Sedimentary (e.g., deltaic, estuarine, wetland, lacustrine, marine facies)	Tidal flat deposit	sediment color, texture	<HAT	-2.12079	0.329242	0.329242	nd	nd	nd	nd	0	0	#REF!
SI86-121	Langford 1989	9a	Hong Kong	22.5166	114.071	1 = Radiocarbon	536.47	116.085	548	133	234	nd	nd	nd	1	0.12	YSD	0.275681	0.275681	-1	5 = Sedimentary (e.g., deltaic, estuarine, wetland, lacustrine, marine facies)	Tidal flat deposit	sediment color, texture	<HAT	-1.44815	0.329242	0.329242	nd	nd	nd	nd	0	0	#REF!
KWG-211	Huang et al. 1983	9a	Hong Kong	22.5309	114.068	1 = Radiocarbon	5480.68	167.102	5682	435	409	regressive	4	7.3	1	-3	YSD	0.539907	0.539907	-1	5 = Sedimentary (e.g., deltaic, estuarine, wetland, lacustrine, marine facies)	Marine deposit	sediment texture, mollusc fossil	<MTL	-2.99779	0.542218	0.542218	nd	nd	nd	nd	0	0	#REF!
GF927	Langford 1989	9a	Hong Kong	22.4845	114.059	1 = Radiocarbon	3236.47	145.717	3461	373	385	nd	nd	nd	1	1.61	YSD	0.275681	0.275681	-1	5 = Sedimentary (e.g., deltaic, estuarine, wetland, lacustrine, marine facies)	Tidal flat deposit	sediment color, texture	<HAT	0.0125057	0.329242	0.329242	nd	nd	nd	nd	0	0	#REF!
GF931	Langford 1989	9a	Hong Kong	22.4764	114.057	1 = Radiocarbon	3176.47	149.025	3383	437	417	nd	nd	nd	1	1.62	YSD	0.275681	0.275681	-1	5 = Sedimentary (e.g., deltaic, estuarine, wetland, lacustrine, marine facies)	Tidal flat deposit	sediment color, texture	<HAT	-0.0265009	0.329242	0.329242	nd	nd	nd	nd	0	0	#REF!
GF932	Langford 1989	9a	Hong Kong	22.4739	114.057	1 = Radiocarbon	6635.36	130.206	7514	209	245	nd	nd	nd	1	0.42	YSD	0.275681	0.275681	-1	5 = Sedimentary (e.g., deltaic, estuarine, wetland, lacustrine, marine facies)	Tidal flat deposit	sediment color, texture	<HAT	-1.22638	0.329242	0.329242	nd	nd	nd	nd	0	0	#REF!
KWG-160	Huang et al. 1983	9a	Hong Kong	22.52	114.053	1 = Radiocarbon	5920.68	167.102	6149	419	425	transgressive	6.9	0.2	1	-5.2	YSD	0.551493	0.551493	-1	5 = Sedimentary (e.g., deltaic, estuarine, wetland, lacustrine, marine facies)	Subtidal deposit	sediment texture, mollusc fossil	<MTL	-5.19403	0.553754	0.553754	nd	nd	nd	nd	0	0	#REF!
Owen95A	Owen 1995	9a	Hong Kong	22.1586	114.051	1 = Radiocarbon	4340.68	449.044	4290	1141	1114	transgressive	3.29	>76.6	1	-22.48	YSD	0.194563	0.194563	-1	5 = Sedimentary (e.g., deltaic, estuarine, wetland, lacustrine, marine facies)	Marine deposit	sediment color, texture, grain size, diatom	<MTL	-22.482	0.200885	0.200885	nd	nd	nd	nd	0	0	#REF!
Owen95B	Owen 1995	9a	Hong Kong	22.1586	114.051	1 = Radiocarbon	8230.68	454.99	8632	1075	1048	transgressive	6.12	>73.8	1	-25.31	YSD	0.220243	0.220243	-1	5 = Sedimentary (e.g., deltaic, estuarine, wetland, lacustrine, marine facies)	Estuarine deposit	sediment color, texture, grain size (with subangular gravels), diatom and shell fragments	<HAT	-26.537	0.284441	0.284441	nd	nd	nd	nd	0	0	#REF!
KWG-223	Huang et al. 1983; Zong 2004	9a	Hong Kong	22.5233	114.05	1 = Radiocarbon	2920.68	102.093	2524	309	343	regressive	5.2	1.9	1	-3.5	YSD	0.543982	0.543982	-1	5 = Sedimentary (e.g., deltaic, estuarine, wetland, lacustrine, marine facies)	Subtidal deposit	sediment texture, mollusc fossil	<MTL	-3.49365	0.546275	0.546275	nd	nd	nd	nd	0	0	#REF!
Beta-323532	Sun et al 2021	9a	Hong Kong	22.4909	114.04	1 = Radiocarbon	1500	30	895	206	201	transgressive	3.08	nd	1	-0.82	YSD	0.193183	0.193183	-1	5 = Sedimentary (e.g., deltaic, estuarine, wetland, lacustrine, marine facies)	Marine deposit	sediment color, texture and grain size	<MTL	-0.80796	0.199548	0.199548	nd	nd	nd	nd	0	0	#REF!
Beta-341291	Sun et al 2021	9a	Hong Kong	22.4909	114.04	1 = Radiocarbon	970	104.403	869	305	191	transgressive	2.86	nd	1	0.6	YSD	0.193383	0.193383	0	5 = Sedimentary (e.g., deltaic, estuarine, wetland, lacustrine, marine facies)	Tidal flat deposit	stable carbon isotope	HAT-LAT	0.551839	1.64886	1.64886	nd	nd	nd	nd	0	0	#REF!
Beta-341292	Sun et al 2021	9a	Hong Kong	22.4938	114.034	1 = Radiocarbon	1080	104.403	997	266	247	transgressive	1.27	nd	1	-0.13	YSD	0.186468	0.186468	0	5 = Sedimentary (e.g., deltaic, estuarine, wetland, lacustrine, marine facies)	Tidal flat deposit	stable carbon isotope	HAT-LAT	-0.17858	1.6462	1.6462	nd	nd	nd	nd	0	0	#REF!
Beta-323533	Sun et al 2021	9a	Hong Kong	22.494	114.034	1 = Radiocarbon	1270	30	679	195	163	transgressive	2.6	nd	1	-1.2	YSD	0.190339	0.190339	-1	5 = Sedimentary (e.g., deltaic, estuarine, wetland, lacustrine, marine facies)	Marine deposit	sediment color, texture and grain size	<MTL	-1.18785	0.196797	0.196797	nd	nd	nd	nd	0	0	#REF!
GF928	Langford et al. 1989	9a	Hong Kong	22.446	114.033	1 = Radiocarbon	6776.47	170.612	7639	316	310	nd	nd	nd	1	-1.88	YSD	0.275681	0.275681	-1	5 = Sedimentary (e.g., deltaic, estuarine, wetland, lacustrine, marine facies)	Tidal flat deposit	sediment color, texture	<HAT	-3.52445	0.329242	0.329242	nd	nd	nd	nd	0	0	#REF!
SI86-109	Langford et al. 1989	9a	Hong Kong	22.4481	114.022	1 = Radiocarbon	1865.36	96.9276	1780	213	233	nd	nd	nd	1	0.02	YSD	0.275681	0.275681	-1	5 = Sedimentary (e.g., deltaic, estuarine, wetland, lacustrine, marine facies)	Tidal flat deposit	sediment color, texture	<HAT	-1.62536	0.329242	0.329242	nd	nd	nd	nd	0	0	#REF!
GF926	Langford et al. 1989	9a	Hong Kong	22.4377	114.016	1 = Radiocarbon	1563.95	75.7383	1451	233	145	nd	nd	nd	1	-4.3	YSD	0.275681	0.275681	1	5 = Sedimentary (e.g., deltaic, estuarine, wetland, lacustrine, marine facies)	Fluvial deposit	sediment color, texture	>MTL	-4.28936	0.280179	0.280179	nd	nd	nd	nd	1	0	#REF!
SI86-122	Langford et al. 1989	9a	Hong Kong	22.4477	114.005	1 = Radiocarbon	3126.47	212.501	3316	514	529	nd	nd	nd	1	-0.68	YSD	0.275681	0.275681	-1	5 = Sedimentary (e.g., deltaic, estuarine, wetland, lacustrine, marine facies)	Tidal flat deposit	sediment color, texture	<HAT	-2.32557	0.329242	0.329242	nd	nd	nd	nd	0	0	#REF!
CS-621	Langford et al. 1989	9a	Hong Kong	22.4328	113.94	1 = Radiocarbon	10005.5	164.515	11558	877	456	transgressive	5.7	0.79	1	-8.57	YSD	0.22135	0.22135	1	5 = Sedimentary (e.g., deltaic, estuarine, wetland, lacustrine, marine facies)	Terrestrial soil	sediment color, texture and grain size	>MTL	-8.55393	0.226927	0.226927	nd	nd	nd	nd	0	0	#REF!
KWG-241	Huang et al. 1983; Li et al. 1991; Zong 2004	9a	Hong Kong	22.5	113.9	1 = Radiocarbon	4370.68	120.096	4335	427	385	rgressive	4	nd	1	-0.5	YSD	0.512445	0.512445	0	6 = Beach rock	Shell hash	sediment texture, mollusc fossil	HAT-LAT	-0.83081	2.25774	2.25774	nd	nd	nd	nd	1	0	#REF!
KWG-178	Xu et al. 1985; Li et al. 1991; Zong 2004	9a	Hong Kong	22.5333	113.9	1 = Radiocarbon	2178.81	134.776	2165	522	367	regressive	2.05	nd	1	-5.6	YSD	0.535519	0.535519	-1	5 = Sedimentary (e.g., deltaic, estuarine, wetland, lacustrine, marine facies)	Subtidal deposit	sediment texture and diatom assemblage	<MTL	-5.56995	0.537848	0.537848	nd	nd	nd	nd	0	0	#REF!
KWG-177	Xu et al. 1985; Li et al. 1991; Zong 2004	9a	Hong Kong	22.5333	113.9	1 = Radiocarbon	2924.81	156.411	3084	360	328	nd	3	nd	1	-6.5	YSD	0.537308	0.537308	-1	5 = Sedimentary (e.g., deltaic, estuarine, wetland, lacustrine, marine facies)	Subtidal deposit	sediment texture and diatom assemblage	<MTL	-6.46995	0.53963	0.53963	nd	nd	nd	nd	0	Inconsistent elevation	#REF!
Beta-429246	Xiong et al 2018	9a	Hong Kong	22.2017	113.896	1 = Radiocarbon	9290	40	10480	161	182	transgressive	41.7	nd	1	-51.5	YSD	0.854214	0.854214	0	5 = Sedimentary (e.g., deltaic, estuarine, wetland, lacustrine, marine facies)	Tidal flat deposit	sediment texture and diatom assemblage	HAT-LAT	-51.5335	1.6025	1.6025	nd	nd	nd	nd	0	0	#REF!
Beta-429245	Xiong et al 2018	9a	Hong Kong	22.2017	113.896	1 = Radiocarbon	9230	30	10390	110	126	transgressive	41	nd	1	-50.8	YSD	0.84055	0.84055	0	5 = Sedimentary (e.g., deltaic, estuarine, wetland, lacustrine, marine facies)	Tidal flat deposit	sediment texture and diatom assemblage	HAT-LAT	-50.8335	1.59526	1.59526	nd	nd	nd	nd	0	0	#REF!
Beta-429247	Xiong et al 2018	9a	Hong Kong	22.2017	113.896	1 = Radiocarbon	9350	30	10560	101	123	transgressive	42.1	nd	0	-51.9	YSD	0.862026	0.862026	0	5 = Sedimentary (e.g., deltaic, estuarine, wetland, lacustrine, marine facies)	Tidal flat deposit	sediment texture and diatom assemblage	HAT-LAT	-51.9335	1.60668	1.60668	nd	nd	nd	nd	0	0	#REF!
Beta-429249	Xiong et al 2018	9a	Hong Kong	22.209	113.892	1 = Radiocarbon	8910	40	10037	153	137	transgressive	34.86	nd	1	-43.26	YSD	0.721258	0.721258	0	5 = Sedimentary (e.g., deltaic, estuarine, wetland, lacustrine, marine facies)	Tidal flat deposit	sediment texture and diatom assemblage	HAT-LAT	-43.297	1.45875	1.45875	nd	nd	nd	nd	0	0	#REF!
Beta-429248	Xiong et al 2018	9a	Hong Kong	22.2086	113.892	1 = Radiocarbon	8880	30	10024	152	203	transgressive	34.54	nd	1	-42.94	YSD	0.715073	0.715073	0	5 = Sedimentary (e.g., deltaic, estuarine, wetland, lacustrine, marine facies)	Tidal flat deposit	sediment texture and diatom assemblage	HAT-LAT	-42.977	1.45584	1.45584	nd	nd	nd	nd	0	0	#REF!
Beta-429255	Xiong et al 2018	9a	Hong Kong	22.21	113.89	1 = Radiocarbon	8570	40	9536	121	59	transgressive	24.91	0.96	1	-31.71	YSD	0.531346	0.531346	0	5 = Sedimentary (e.g., deltaic, estuarine, wetland, lacustrine, marine facies)	Tidal flat deposit	sediment texture and diatom assemblage	HAT-LAT	-31.7478	1.40093	1.40093	nd	nd	nd	nd	0	0	#REF!
Beta-429256	Xiong et al 2018	9a	Hong Kong	22.21	113.89	1 = Radiocarbon	8710	30	9641	238	93	transgressive	25.73	0.14	0	-32.53	YSD	0.546752	0.546752	0	5 = Sedimentary (e.g., deltaic, estuarine, wetland, lacustrine, marine facies)	Tidal flat deposit	sediment texture and diatom assemblage	HAT-LAT	-32.5678	1.40685	1.40685	nd	nd	nd	nd	0	0	#REF!
KWG-219	Huang et al. 1983	9a	Hong Kong	22.45	113.883	1 = Radiocarbon	6498.81	206.069	7378	397	476	0	8.9	6.1	1	-10.1	YSD	0.562836	0.562836	-1	5 = Sedimentary (e.g., deltaic, estuarine, wetland, lacustrine, marine facies)	Subtidal deposit	sediment texture	<MTL	-10.0643	0.565052	0.565052	nd	nd	nd	nd	0	0	#REF!
KWG-186	Huang et al. 1986	9a	Hong Kong	22.45	113.883	1 = Radiocarbon	7108.81	188.851	7931	394	325	transgressive	14	1.7	0	-15.1	YSD	0.60291	0.60291	-1	5 = Sedimentary (e.g., deltaic, estuarine, wetland, lacustrine, marine facies)	Subtidal deposit	sediment texture	<MTL	-15.0643	0.604979	0.604979	nd	nd	nd	nd	0	0	#REF!
KWG-237	Li et al. 1991; Zong 2004	9a	Hong Kong	22.45	113.88	1 = Radiocarbon	1308.81	122.33	1206	205	269	regressive	0.5	11.8	1	2	YSD	0.534041	0.534041	-1	5 = Sedimentary (e.g., deltaic, estuarine, wetland, lacustrine, marine facies)	Lagoon deposit	Field observation	<HAT	0.400623	0.56356	0.56356	nd	nd	nd	nd	0	0	#REF!
OxA-5428	Fyfe et al 1999	9a	Hong Kong	22.1832	113.868	1 = Radiocarbon	390.682	438.88	245	498	244	transgressive	1.5	>68.5	1	-9.98	YSD	2.507	2.507	-1	5 = Sedimentary (e.g., deltaic, estuarine, wetland, lacustrine, marine facies)	Prodelta deposit	sediment texture, grain size, diatom and foraminifera assemblage	<MTL	-9.94559	2.50749	2.50749	nd	nd	nd	nd	0	0	#REF!
OxA-5429	Fyfe et al 1999	9a	Hong Kong	22.1832	113.868	1 = Radiocarbon	390.682	438.88	245	498	244	transgressive	6	>64	1	-14.48	YSD	2.50969	2.50969	-1	5 = Sedimentary (e.g., deltaic, estuarine, wetland, lacustrine, marine facies)	Delta front deposit	sediment texture, grain size, diatom and foraminifera assemblage	<MTL	-14.4456	2.51018	2.51018	nd	nd	nd	nd	0	0	#REF!
OxA-5430	Fyfe et al 1999	9a	Hong Kong	22.1832	113.868	1 = Radiocarbon	390.682	438.88	245	498	244	transgressive	7	>63	1	-15.48	YSD	2.51072	2.51072	-1	5 = Sedimentary (e.g., deltaic, estuarine, wetland, lacustrine, marine facies)	Delta front deposit	sediment texture, grain size, diatom and foraminifera assemblage	<MTL	-15.4456	2.51122	2.51122	nd	nd	nd	nd	0	0	#REF!
WangPO01	Wang, 1993; Wang, 1998	9a	Hong Kong	22.2413	113.979	1 = Radiocarbon	3210.68	449.044	2877	1124	1144	regressive	5.165	nd	1	0.905	YSD	0.512957	0.512957	0	6 = Beach rock	Beach rock	Calcareous cement and lamination	HAT-LAT	0.855498	1.6107	1.6107	nd	nd	nd	nd	0	0	#REF!
WangPO02	Wang, 1993; Wang, 1998	9a	Hong Kong	22.2413	113.979	1 = Radiocarbon	2770.68	448.013	2341	1081	1057	regressive	5.28	nd	1	0.72	YSD	0.515849	0.515849	0	6 = Beach rock	Beach rock	Calcareous cement and lamination	HAT-LAT	0.670498	1.61162	1.61162	nd	nd	nd	nd	0	0	#REF!
WangPO03	Wang, 1993; Wang, 1998	9a	Hong Kong	22.2413	113.979	1 = Radiocarbon	2090.68	446.112	1565	1054	934	regressive	5.775	nd	1	0.095	YSD	0.527376	0.527376	0	6 = Beach rock	Beach rock	Calcareous cement and lamination	HAT-LAT	0.0454976	1.61612	1.61612	nd	nd	nd	nd	0	0	#REF!
WangCC01	Wang, 1998	9a	Hong Kong	22.2338	113.957	1 = Radiocarbon	1690.68	442.962	1136	987	871	regressive	nd	nd	1	0	YSD	1.12611	1.12611	0	6 = Beach rock	Beach rock	Calcareous cement and lamination	HAT-LAT	-0.0476091	1.85473	1.85473	nd	nd	nd	nd	0	0	#REF!
ANU-10154	Yim, 2006	9a	Hong Kong	22.2989	113.89	1 = Radiocarbon	4480	172.047	5124	459	477	transgressive	0.85	11.15	1	-8.076	YSD	0.534218	0.534218	-1	5 = Sedimentary (e.g., deltaic, estuarine, wetland, lacustrine, marine facies)	Marine deposit	Marine foraminifera A. beccarii var., Hanzawaia nipponica (Asano), and Elphidium spp.	<MTL	-8.02987	0.536553	0.536553	nd	nd	nd	nd	0	0	#REF!
ANU-10155	Yim, 2006	9a	Hong Kong	22.2989	113.89	1 = Radiocarbon	4540	214.709	5182	523	602	transgressive	6.05	5.95	1	-13.276	YSD	0.547486	0.547486	-1	5 = Sedimentary (e.g., deltaic, estuarine, wetland, lacustrine, marine facies)	Marine deposit	Marine foraminifera A. beccarii var., Hanzawaia nipponica (Asano), and Elphidium spp.	<MTL	-13.2299	0.549764	0.549764	nd	nd	nd	nd	0	0	#REF!
KIA-2287	Yim, 2006	9a	Hong Kong	22.2989	113.89	1 = Radiocarbon	4740	30	4809	248	276	transgressive	10.2	1.8	1	-17.426	YSD	0.569422	0.569422	-1	5 = Sedimentary (e.g., deltaic, estuarine, wetland, lacustrine, marine facies)	Marine deposit	Marine foraminifera A. beccarii var., Hanzawaia nipponica (Asano), and Elphidium spp.	<MTL	-17.3799	0.571613	0.571613	nd	nd	nd	nd	0	0	#REF!
ANU-10156	Yim, 2006	9a	Hong Kong	22.2989	113.89	1 = Radiocarbon	5440	141.421	6216	314	306	transgressive	11.45	0.55	1	-18.676	YSD	0.580983	0.580983	-1	5 = Sedimentary (e.g., deltaic, estuarine, wetland, lacustrine, marine facies)	Transgressive contact (nearshore)	Shallow-water benthonic bethic foraminifera including Ammonia beccarii var., Elphidium advenum (Cushman),	<HAT	-20.3676	0.608228	0.608228	nd	nd	nd	nd	0	0	#REF!
ANU-10157	Yim, 2006	9a	Hong Kong	22.2989	113.89	1 = Radiocarbon	19430	392.938	23409	825	909	transgressive	12.15	nd	1	-19.376	YSD	0.586642	0.586642	1	5 = Sedimentary (e.g., deltaic, estuarine, wetland, lacustrine, marine facies)	Terrestrial soil	Paleosol	>MTL	-19.3299	0.588769	0.588769	nd	nd	nd	nd	0	0	#REF!
KIA-2290	Yim, 2006	9a	Hong Kong	22.331	114.478	1 = Radiocarbon	780	30	249	198	210	transgressive	0.5	nd	1	-27.526	YSD	0.531719	0.531719	-1	5 = Sedimentary (e.g., deltaic, estuarine, wetland, lacustrine, marine facies)	Marine deposit	Marine foraminifera A. beccarii var., Hanzawaia nipponica (Asano), and Elphidium spp.	<MTL	-27.515	0.534065	0.534065	nd	nd	nd	nd	0	0	#REF!
KIA-2291	Yim, 2006	9a	Hong Kong	22.331	114.478	1 = Radiocarbon	1880	30	1288	210	201	transgressive	1.5	nd	1	-28.526	YSD	0.532471	0.532471	-1	5 = Sedimentary (e.g., deltaic, estuarine, wetland, lacustrine, marine facies)	Marine deposit	Marine foraminifera A. beccarii var., Hanzawaia nipponica (Asano), and Elphidium spp.	<MTL	-28.515	0.534813	0.534813	nd	nd	nd	nd	0	0	#REF!
KIA-2292	Yim, 2006	9a	Hong Kong	22.331	114.478	1 = Radiocarbon	2940	30	2550	199	224	transgressive	3.3	nd	1	-30.326	YSD	0.535706	0.535706	-1	5 = Sedimentary (e.g., deltaic, estuarine, wetland, lacustrine, marine facies)	Marine deposit	Marine foraminifera A. beccarii var., Hanzawaia nipponica (Asano), and Elphidium spp.	<MTL	-30.315	0.538034	0.538034	nd	nd	nd	nd	0	0	#REF!
KIA-2293	Yim, 2006	9a	Hong Kong	22.331	114.478	1 = Radiocarbon	7490	50	7779	198	207	transgressive	7.25	nd	1	-34.276	YSD	0.551044	0.551044	-1	5 = Sedimentary (e.g., deltaic, estuarine, wetland, lacustrine, marine facies)	Marine deposit	Marine foraminifera A. beccarii var., Hanzawaia nipponica (Asano), and Elphidium spp.	<MTL	-34.265	0.553308	0.553308	nd	nd	nd	nd	0	0	#REF!
GIFA-101372	Yim, 2006	9a	Hong Kong	21.665	114.192	1 = Radiocarbon	5820	70	6049	239	267	transgressive	2.125	nd	1	-55.156	YSD	0.547683	0.547683	-1	5 = Sedimentary (e.g., deltaic, estuarine, wetland, lacustrine, marine facies)	Marine deposit	Marine foraminifera A. beccarii var., Hanzawaia nipponica (Asano), and Elphidium spp.	<HAT	-56.2224	0.576503	0.576503	nd	nd	nd	nd	0	0	#REF!
GIFA-101373	Yim, 2006	9a	Hong Kong	21.665	114.192	1 = Radiocarbon	9740	100	10519	453	341	transgressive	2.375	nd	1	-55.406	YSD	0.548093	0.548093	-1	5 = Sedimentary (e.g., deltaic, estuarine, wetland, lacustrine, marine facies)	Transgressive contact	Shallow-water benthonic bethic foraminifera including Ammonia beccarii var., Elphidium advenum (Cushman),	<MTL	-55.4011	0.550369	0.550369	nd	nd	nd	nd	0	0	#REF!
GIFA-101374	Yim, 2006	9a	Hong Kong	21.6654	114.301	1 = Radiocarbon	2150	60	1576	248	242	nd	0.125	nd	1	-52.156	YSD	0.546037	0.546037	-1	5 = Sedimentary (e.g., deltaic, estuarine, wetland, lacustrine, marine facies)	Transgressive contact (Uncertain)	Gravel and sand, not other evidence	<HAT	-53.2418	0.57494	0.57494	nd	nd	nd	nd	1	0	#REF!
GIFA-101375	Yim, 2006	9a	Hong Kong	21.6654	114.301	1 = Radiocarbon	4750	70	4823	324	312	nd	0.625	nd	1	-52.656	YSD	0.546174	0.546174	-1	5 = Sedimentary (e.g., deltaic, estuarine, wetland, lacustrine, marine facies)	Transgressive contact (Uncertain)	Gravel and sand, not other evidence	<HAT	-53.7418	0.575071	0.575071	nd	nd	nd	nd	1	0	#REF!
GIFA-101376	Yim, 2006	9a	Hong Kong	21.6654	114.301	1 = Radiocarbon	2320	45	1777	241	245	nd	0.625	nd	1	-52.656	YSD	0.546174	0.546174	-1	5 = Sedimentary (e.g., deltaic, estuarine, wetland, lacustrine, marine facies)	Transgressive contact (Uncertain)	Gravel and sand, not other evidence	<HAT	-53.7418	0.575071	0.575071	nd	nd	nd	nd	1	0	#REF!
GIFA-101377	Yim, 2006	9a	Hong Kong	21.6654	114.301	1 = Radiocarbon	4040	70	3899	313	300	nd	0.625	nd	1	-52.656	YSD	0.546174	0.546174	-1	5 = Sedimentary (e.g., deltaic, estuarine, wetland, lacustrine, marine facies)	Transgressive contact (Uncertain)	Gravel and sand, not other evidence	<HAT	-53.7418	0.575071	0.575071	nd	nd	nd	nd	1	0	#REF!
GIFA-101378	Yim, 2006	9a	Hong Kong	21.6654	114.301	1 = Radiocarbon	3060	70	2690	266	308	nd	0.625	nd	1	-52.656	YSD	0.546174	0.546174	-1	5 = Sedimentary (e.g., deltaic, estuarine, wetland, lacustrine, marine facies)	Transgressive contact (Uncertain)	Gravel and sand, not other evidence	<HAT	-53.7418	0.575071	0.575071	nd	nd	nd	nd	1	0	#REF!
GIFA-101379	Yim, 2006	9a	Hong Kong	21.6655	114.372	1 = Radiocarbon	830	60	301	197	235	transgressive	0.375	nd	1	-59.406	YSD	0.546083	0.546083	-1	5 = Sedimentary (e.g., deltaic, estuarine, wetland, lacustrine, marine facies)	Marine deposit	Marine foraminifera A. beccarii var., Hanzawaia nipponica (Asano), and Elphidium spp.	<MTL	-59.4426	0.548367	0.548367	nd	nd	nd	nd	0	0	#REF!
GIFA-101380	Yim, 2006	9a	Hong Kong	21.6655	114.372	1 = Radiocarbon	7710	70	8005	260	243	transgressive	1.05	nd	1	-60.076	YSD	0.53429	0.53429	-1	5 = Sedimentary (e.g., deltaic, estuarine, wetland, lacustrine, marine facies)	Transgressive contact	Shallow-water benthonic bethic foraminifera including Ammonia beccarii var., Elphidium advenum (Cushman),	<HAT	-61.2273	0.563796	0.563796	nd	nd	nd	nd	0	0	#REF!
Gif-11683	Yim, 2006	9a	Hong Kong	21.6657	114.484	1 = Radiocarbon	2840	114.127	2979	343	227	transgressive	0.125	nd	1	-66.146	YSD	0.548299	0.548299	-1	5 = Sedimentary (e.g., deltaic, estuarine, wetland, lacustrine, marine facies)	Marine deposit	Marine foraminifera Bigenerina Taiwanica, Textularia conica,Pseudorotalia indopacifica	<MTL	-66.1922	0.550574	0.550574	nd	nd	nd	nd	0	0	#REF!
Gif-11689	Yim, 2006	9a	Hong Kong	21.6657	114.484	1 = Radiocarbon	3385	105.948	3632	256	238	transgressive	0.375	nd	1	-66.406	YSD	0.548344	0.548344	-1	5 = Sedimentary (e.g., deltaic, estuarine, wetland, lacustrine, marine facies)	Marine deposit	Marine foraminifera Bigenerina Taiwanica, Textularia conica,Pseudorotalia indopacifica	<MTL	-66.4522	0.550619	0.550619	nd	nd	nd	nd	0	0	#REF!
Gif-11686	Yim, 2006	9a	Hong Kong	21.6657	114.484	1 = Radiocarbon	3920	116.619	4350	455	362	transgressive	0.625	nd	1	-66.656	YSD	0.549596	0.549596	-1	5 = Sedimentary (e.g., deltaic, estuarine, wetland, lacustrine, marine facies)	Marine deposit	Marine foraminifera Bigenerina Taiwanica, Textularia conica,Pseudorotalia indopacifica	<MTL	-66.7022	0.551866	0.551866	nd	nd	nd	nd	0	0	#REF!
Gif-11676	Yim, 2006	0	Hong Kong	21.6657	114.484	1 = Radiocarbon	4690	107.703	5408	193	359	transgressive	0.875	nd	1	-66.906	YSD	0.549733	0.549733	-1	5 = Sedimentary (e.g., deltaic, estuarine, wetland, lacustrine, marine facies)	Marine deposit	Marine foraminifera Bigenerina Taiwanica, Textularia conica,Pseudorotalia indopacifica	<MTL	-66.9522	0.552002	0.552002	nd	nd	nd	nd	0	0	#REF!
Gif-11682	Yim, 2006	9a	Hong Kong	21.6657	114.484	1 = Radiocarbon	5420	119.269	6197	241	267	transgressive	1.125	nd	1	-67.156	YSD	0.549915	0.549915	-1	5 = Sedimentary (e.g., deltaic, estuarine, wetland, lacustrine, marine facies)	Marine deposit	Marine foraminifera Bigenerina Taiwanica, Textularia conica,Pseudorotalia indopacifica	<MTL	-67.2022	0.552183	0.552183	nd	nd	nd	nd	0	0	#REF!
GIFA-101381	Yim, 2006	9a	Hong Kong	21.6657	114.484	1 = Radiocarbon	6460	90	6740	308	306	transgressive	1.375	nd	1	-67.406	YSD	0.547888	0.547888	-1	5 = Sedimentary (e.g., deltaic, estuarine, wetland, lacustrine, marine facies)	Marine deposit	Marine foraminifera Bigenerina Taiwanica, Textularia conica,Pseudorotalia indopacifica	<MTL	-67.4522	0.550165	0.550165	nd	nd	nd	nd	0	0	#REF!
Gif-11693	Yim, 2006	9a	Hong Kong	21.6657	114.484	1 = Radiocarbon	7040	128.062	7859	305	243	transgressive	1.375	nd	1	-67.406	YSD	0.550142	0.550142	-1	5 = Sedimentary (e.g., deltaic, estuarine, wetland, lacustrine, marine facies)	Marine deposit	Marine foraminifera Bigenerina Taiwanica, Textularia conica,Pseudorotalia indopacifica	<MTL	-67.4522	0.552409	0.552409	nd	nd	nd	nd	0	0	#REF!
Gif-11692	Yim, 2006	9a	Hong Kong	21.6657	114.484	1 = Radiocarbon	8995	119.269	10085	398	388	transgressive	1.625	nd	1	-67.656	YSD	0.550415	0.550415	-1	5 = Sedimentary (e.g., deltaic, estuarine, wetland, lacustrine, marine facies)	Marine deposit	Marine foraminifera Bigenerina Taiwanica, Textularia conica,Pseudorotalia indopacifica	<MTL	-67.7022	0.552681	0.552681	nd	nd	nd	nd	0	0	#REF!
Gif-11691	Yim, 2006	9a	Hong Kong	21.6657	114.484	1 = Radiocarbon	11440	192.938	13323	425	393	transgressive	2.125	nd	1	-68.156	YSD	0.551095	0.551095	-1	5 = Sedimentary (e.g., deltaic, estuarine, wetland, lacustrine, marine facies)	Transgressive contact (nearshore)	Shallow-water benthonic bethic foraminifera including Ammonia beccarii var., Elphidium advenum (Cushman),	<HAT	-69.3369	0.579747	0.579747	nd	nd	nd	nd	0	0	#REF!
GIFA-101382	Yim, 2006	9a	Hong Kong	21.6657	114.484	1 = Radiocarbon	9140	100	9722	385	298	transgressive	2.125	nd	1	-68.156	YSD	0.548845	0.548845	-1	5 = Sedimentary (e.g., deltaic, estuarine, wetland, lacustrine, marine facies)	Transgressive contact (nearshore)	Shallow-water benthonic bethic foraminifera including Ammonia beccarii var., Elphidium advenum (Cushman),	<HAT	-69.3369	0.577608	0.577608	nd	nd	nd	nd	0	0	#REF!
GIFA-101383	Yim, 2006	9a	Hong Kong	21.6657	114.484	1 = Radiocarbon	9120	90	9694	383	280	transgressive	2.125	nd	1	-68.156	YSD	0.548845	0.548845	-1	5 = Sedimentary (e.g., deltaic, estuarine, wetland, lacustrine, marine facies)	Transgressive contact (nearshore)	Shallow-water benthonic bethic foraminifera including Ammonia beccarii var., Elphidium advenum (Cushman),	<HAT	-69.3369	0.577608	0.577608	nd	nd	nd	nd	0	0	#REF!
GIFA-101384	Yim, 2006	9a	Hong Kong	21.6657	114.484	1 = Radiocarbon	9940	100	10814	357	372	transgressive	2.125	nd	1	-68.156	YSD	0.548845	0.548845	-1	5 = Sedimentary (e.g., deltaic, estuarine, wetland, lacustrine, marine facies)	Transgressive contact (nearshore)	Shallow-water benthonic bethic foraminifera including Ammonia beccarii var., Elphidium advenum (Cushman),	<HAT	-69.3369	0.577608	0.577608	nd	nd	nd	nd	0	0	#REF!
GIFA-101385	Yim, 2006	9a	Hong Kong	21.6657	114.484	1 = Radiocarbon	10320	100	11343	424	348	transgressive	2.125	nd	1	-68.156	YSD	0.548845	0.548845	-1	5 = Sedimentary (e.g., deltaic, estuarine, wetland, lacustrine, marine facies)	Transgressive contact (nearshore)	Shallow-water benthonic bethic foraminifera including Ammonia beccarii var., Elphidium advenum (Cushman),	<HAT	-69.3369	0.577608	0.577608	nd	nd	nd	nd	0	0	#REF!
GIFA-101386	Yim, 2006	9a	Hong Kong	21.6657	114.484	1 = Radiocarbon	10170	110	11120	424	426	transgressive	2.125	nd	1	-68.156	YSD	0.548845	0.548845	-1	5 = Sedimentary (e.g., deltaic, estuarine, wetland, lacustrine, marine facies)	Transgressive contact (nearshore)	Shallow-water benthonic bethic foraminifera including Ammonia beccarii var., Elphidium advenum (Cushman),	<HAT	-69.3369	0.577608	0.577608	nd	nd	nd	nd	0	0	#REF!
GIFA-101387	Yim, 2006	9a	Hong Kong	21.6657	114.484	1 = Radiocarbon	8990	100	9529	379	335	transgressive	2.125	nd	1	-68.156	YSD	0.548845	0.548845	-1	5 = Sedimentary (e.g., deltaic, estuarine, wetland, lacustrine, marine facies)	Transgressive contact (nearshore)	Shallow-water benthonic bethic foraminifera including Ammonia beccarii var., Elphidium advenum (Cushman),	<HAT	-69.3369	0.577608	0.577608	nd	nd	nd	nd	0	0	#REF!
Gif-11685	Yim, 2006	9a	Hong Kong	21.6657	114.484	1 = Radiocarbon	11020	152.398	12947	232	223	transgressive	2.125	nd	1	-68.156	YSD	0.551095	0.551095	-1	5 = Sedimentary (e.g., deltaic, estuarine, wetland, lacustrine, marine facies)	Transgressive contact (nearshore)	Shallow-water benthonic bethic foraminifera including Ammonia beccarii var., Elphidium advenum (Cushman),	<HAT	-69.3369	0.579747	0.579747	nd	nd	nd	nd	0	0	#REF!
GIFA-101388	Yim, 2006	9a	Hong Kong	21.6657	114.484	1 = Radiocarbon	10300	100	11315	427	370	transgressive	2.375	nd	1	-68.406	YSD	0.549255	0.549255	-1	5 = Sedimentary (e.g., deltaic, estuarine, wetland, lacustrine, marine facies)	Transgressive contact (nearshore)	Shallow-water benthonic bethic foraminifera including Ammonia beccarii var., Elphidium advenum (Cushman),	<HAT	-69.5869	0.577998	0.577998	nd	nd	nd	nd	0	0	#REF!
Gif-11684	Yim, 2006	9a	Hong Kong	21.6657	114.484	1 = Radiocarbon	12625	176.139	39840	1109	1133	transgressive	2.375	nd	1	-68.406	YSD	0.551504	0.551504	-1	5 = Sedimentary (e.g., deltaic, estuarine, wetland, lacustrine, marine facies)	Transgressive contact (nearshore)	Shallow-water benthonic bethic foraminifera including Ammonia beccarii var., Elphidium advenum (Cushman),	<HAT	-69.5869	0.580135	0.580135	nd	nd	nd	nd	0	0	#REF!
GIFA-102054	Yim, 2006	9a	Hong Kong	21.6658	114.579	1 = Radiocarbon	3730	80	14938	587	734	transgressive	0.875	nd	1	-69.906	YSD	0.547477	0.547477	-1	5 = Sedimentary (e.g., deltaic, estuarine, wetland, lacustrine, marine facies)	Marine deposit	Marine foraminifera Bigenerina Taiwanica, Textularia conica,Pseudorotalia indopacifica	<MTL	-69.9575	0.549756	0.549756	nd	nd	nd	nd	0	0	#REF!
GIFA-101392	Yim, 2006	9a	Hong Kong	21.6658	114.679	1 = Radiocarbon	5050	80	5192	278	318	transgressive	1.625	nd	1	-74.656	YSD	0.548162	0.548162	-1	5 = Sedimentary (e.g., deltaic, estuarine, wetland, lacustrine, marine facies)	Marine deposit	Marine foraminifera Bigenerina Taiwanica, Textularia conica,Pseudorotalia indopacifica	<MTL	-74.7109	0.550437	0.550437	nd	nd	nd	nd	0	0	#REF!
#REF!	#REF!	#REF!	#REF!	#REF!	#REF!	#REF!	#REF!	#REF!	#REF!	#REF!	#REF!	#REF!	#REF!	#REF!	#REF!	#REF!	#REF!	#REF!	#REF!	#REF!	#REF!	#REF!	#REF!	#REF!	#REF!	#REF!	#REF!	#REF!	#REF!	#REF!	#REF!	#REF!	#REF!	#REF!
GIFA-101395	Yim, 2006	9a	Hong Kong	21.6659	114.864	1 = Radiocarbon	1750	60	1154	205	228	transgressive	0.375	nd	1	-80.406	YSD	0.547249	0.547249	-1	5 = Sedimentary (e.g., deltaic, estuarine, wetland, lacustrine, marine facies)	Marine deposit	Marine foraminifera Bigenerina Taiwanica, Textularia conica,Pseudorotalia indopacifica	<MTL	-80.482	0.549528	0.549528	nd	nd	nd	nd	0	0	#REF!
GIFA-101396	Yim, 2006	9a	Hong Kong	21.6659	114.864	1 = Radiocarbon	10280	100	11286	416	397	transgressive	0.875	nd	1	-80.906	YSD	0.547477	0.547477	-1	5 = Sedimentary (e.g., deltaic, estuarine, wetland, lacustrine, marine facies)	Transgressive contact (nearshore)	Shallow-water benthonic bethic foraminifera including Ammonia beccarii var., Elphidium advenum (Cushman),	<HAT	-82.1544	0.576308	0.576308	nd	nd	nd	nd	0	0	#REF!
GIFA-101397	Yim, 2006	9a	Hong Kong	21.6659	114.992	1 = Radiocarbon	12140	120	13491	350	341	transgressive	1.1	nd	1	-85.126	YSD	0.541303	0.541303	-1	5 = Sedimentary (e.g., deltaic, estuarine, wetland, lacustrine, marine facies)	Transgressive contact (nearshore)	Shallow-water benthonic bethic foraminifera including Ammonia beccarii var., Elphidium advenum (Cushman),	<HAT	-86.3654	0.570446	0.570446	nd	nd	nd	nd	0	0	#REF!
GIFA-101398	Yim, 2006	9a	Hong Kong	21.6655	115.086	1 = Radiocarbon	9040	100	9597	396	326	transgressive	0.375	nd	1	-91.406	YSD	0.547249	0.547249	-1	5 = Sedimentary (e.g., deltaic, estuarine, wetland, lacustrine, marine facies)	Marine deposit	Deep marine foraminifera Cibicides bimargaritiferus, C. praecinctes, P. indopacifica, Rubulus calcar	<MTL	-91.4783	0.549528	0.549528	nd	nd	nd	nd	0	0	#REF!
GIFA-101399	Yim, 2006	9a	Hong Kong	21.6655	115.086	1 = Radiocarbon	5390	90	5582	288	273	transgressive	1.05	nd	1	-92.076	YSD	0.53429	0.53429	-1	5 = Sedimentary (e.g., deltaic, estuarine, wetland, lacustrine, marine facies)	Transgressive contact (nearshore)	Shallow-water benthonic bethic foraminifera including Ammonia beccarii var., Elphidium advenum (Cushman),	<HAT	-93.3103	0.563796	0.563796	nd	nd	nd	nd	0	0	#REF!
Gif-11678	Yim, 2006	9a	Hong Kong	21.665	115.262	1 = Radiocarbon	10440	148.661	12293	420	461	transgressive	0.125	nd	1	-102.156	YSD	0.54946	0.54946	-1	5 = Sedimentary (e.g., deltaic, estuarine, wetland, lacustrine, marine facies)	Marine deposit	Deep marine foraminifera Cibicides bimargaritiferus, C. praecinctes, P. indopacifica, Rubulus calcar	<MTL	-102.227	0.55173	0.55173	nd	nd	nd	nd	0	0	#REF!
Gif-11674	Yim, 2006	9a	Hong Kong	21.665	115.262	1 = Radiocarbon	3050	105.948	3234	230	281	transgressive	0.375	nd	1	-102.406	YSD	0.549505	0.549505	-1	5 = Sedimentary (e.g., deltaic, estuarine, wetland, lacustrine, marine facies)	Marine deposit	Deep marine foraminifera Cibicides bimargaritiferus, C. praecinctes, P. indopacifica, Rubulus calcar	<MTL	-102.477	0.551776	0.551776	nd	nd	nd	nd	0	0	#REF!
Gif-11677	Yim, 2006	9a	Hong Kong	21.665	115.262	1 = Radiocarbon	3690	114.127	4036	368	315	transgressive	0.625	nd	1	-102.656	YSD	0.549596	0.549596	-1	5 = Sedimentary (e.g., deltaic, estuarine, wetland, lacustrine, marine facies)	Marine deposit	Deep marine foraminifera Cibicides bimargaritiferus, C. praecinctes, P. indopacifica, Rubulus calcar	<MTL	-102.727	0.551866	0.551866	nd	nd	nd	nd	0	0	#REF!
Gif-11687	Yim, 2006	9a	Hong Kong	21.665	115.262	1 = Radiocarbon	4945	107.703	5694	225	222	transgressive	0.875	nd	1	-102.906	YSD	0.549733	0.549733	-1	5 = Sedimentary (e.g., deltaic, estuarine, wetland, lacustrine, marine facies)	Marine deposit	Deep marine foraminifera Cibicides bimargaritiferus, C. praecinctes, P. indopacifica, Rubulus calcar	<MTL	-102.977	0.552002	0.552002	nd	nd	nd	nd	0	0	#REF!
GIFA-101400	Yim, 2006	9a	Hong Kong	21.665	115.262	1 = Radiocarbon	6190	75	6441	267	248	transgressive	1.125	nd	1	-103.156	YSD	0.54766	0.54766	-1	5 = Sedimentary (e.g., deltaic, estuarine, wetland, lacustrine, marine facies)	Marine deposit	Deep marine foraminifera Cibicides bimargaritiferus, C. praecinctes, P. indopacifica, Rubulus calcar	<MTL	-103.227	0.549937	0.549937	nd	nd	nd	nd	0	0	#REF!
GIFA-101401	Yim, 2006	9a	Hong Kong	21.665	115.262	1 = Radiocarbon	9870	110	10714	395	408	transgressive	1.125	nd	1	-103.156	YSD	0.54766	0.54766	-1	5 = Sedimentary (e.g., deltaic, estuarine, wetland, lacustrine, marine facies)	Marine deposit	Deep marine foraminifera Cibicides bimargaritiferus, C. praecinctes, P. indopacifica, Rubulus calcar	<MTL	-103.227	0.549937	0.549937	nd	nd	nd	nd	0	0	#REF!
GIFA-101402	Yim, 2006	9a	Hong Kong	21.665	115.262	1 = Radiocarbon	4140	80	4032	327	319	transgressive	1.125	nd	1	-103.156	YSD	0.54766	0.54766	-1	5 = Sedimentary (e.g., deltaic, estuarine, wetland, lacustrine, marine facies)	Marine deposit	Deep marine foraminifera Cibicides bimargaritiferus, C. praecinctes, P. indopacifica, Rubulus calcar	<MTL	-103.227	0.549937	0.549937	nd	nd	nd	nd	0	0	#REF!
Gif-11688	Yim, 2006	9a	Hong Kong	21.665	115.262	1 = Radiocarbon	5590	128.062	6390	281	378	transgressive	1.125	nd	1	-103.156	YSD	0.549915	0.549915	-1	5 = Sedimentary (e.g., deltaic, estuarine, wetland, lacustrine, marine facies)	Marine deposit	Deep marine foraminifera Cibicides bimargaritiferus, C. praecinctes, P. indopacifica, Rubulus calcar	<MTL	-103.227	0.552183	0.552183	nd	nd	nd	nd	0	0	#REF!
GIFA-101403	Yim, 2006	9a	Hong Kong	21.665	115.262	1 = Radiocarbon	8290	134.536	8661	416	375	transgressive	1.375	nd	1	-103.406	YSD	0.547888	0.547888	-1	5 = Sedimentary (e.g., deltaic, estuarine, wetland, lacustrine, marine facies)	Transgressive contact (nearshore)	Shallow-water benthonic bethic foraminifera including Ammonia beccarii var., Elphidium advenum (Cushman),	<HAT	-104.634	0.576699	0.576699	nd	nd	nd	nd	0	0	#REF!
Gif-11690	Yim, 2006	9a	Hong Kong	21.665	115.262	1 = Radiocarbon	11430	130	13309	264	210	transgressive	1.375	nd	1	-103.406	YSD	0.550142	0.550142	-1	5 = Sedimentary (e.g., deltaic, estuarine, wetland, lacustrine, marine facies)	Transgressive contact (nearshore)	Shallow-water benthonic bethic foraminifera including Ammonia beccarii var., Elphidium advenum (Cushman),	<HAT	-104.634	0.57884	0.57884	nd	nd	nd	nd	0	0	#REF!
GIFA-101404	Yim, 2006	9a	Hong Kong	21.665	115.262	1 = Radiocarbon	10670	148.661	11855	552	526	transgressive	1.65	nd	1	-103.676	YSD	0.553276	0.553276	-1	5 = Sedimentary (e.g., deltaic, estuarine, wetland, lacustrine, marine facies)	Transgressive contact (nearshore)	Shallow-water benthonic bethic foraminifera including Ammonia beccarii var., Elphidium advenum (Cushman),	<HAT	-104.904	0.58182	0.58182	nd	nd	nd	nd	0	0	#REF!
Gif-11675	Yim, 2006	9a	Hong Kong	21.665	115.262	1 = Radiocarbon	9840	110	11284	451	476	transgressive	1.65	nd	1	-103.676	YSD	0.555508	0.555508	-1	5 = Sedimentary (e.g., deltaic, estuarine, wetland, lacustrine, marine facies)	Transgressive contact (nearshore)	Shallow-water benthonic bethic foraminifera including Ammonia beccarii var., Elphidium advenum (Cushman),	<HAT	-104.904	0.583943	0.583943	nd	nd	nd	nd	0	0	#REF!
GIFA-101405	Yim, 2006	9a	Hong Kong	21.6354	115.355	1 = Radiocarbon	12340	306.757	13787	989	722	transgressive	0.875	nd	1	-106.906	YSD	0.547477	0.547477	-1	5 = Sedimentary (e.g., deltaic, estuarine, wetland, lacustrine, marine facies)	Marine deposit	Deep marine foraminifera Cibicides bimargaritiferus, C. praecinctes, P. indopacifica, Rubulus calcar	<MTL	-106.932	0.549756	0.549756	nd	nd	nd	nd	0	0	#REF!
GIFA-101406	Yim, 2006	9a	Hong Kong	21.6354	115.355	1 = Radiocarbon	4670	80	4716	314	309	transgressive	1.425	nd	1	-107.456	YSD	0.560323	0.560323	1	6 = Beach rock	Beach ridge	Colour (yellow) and shell fragments	>MLLW	-106.903	0.688449	0.688449	nd	nd	nd	nd	0	0	#REF!
GIFA-101407	Yim, 2006	9a	Hong Kong	21.5451	115.497	1 = Radiocarbon	12640	110	14147	582	407	transgressive	0.875	nd	1	-114.906	YSD	0.547477	0.547477	-1	5 = Sedimentary (e.g., deltaic, estuarine, wetland, lacustrine, marine facies)	Marine deposit	Deep marine foraminifera Cibicides bimargaritiferus, C. praecinctes, P. indopacifica, Rubulus calcar	<MTL	-114.931	0.549756	0.549756	nd	nd	nd	nd	0	0	#REF!
GIFA-101408	Yim, 2006	9a	Hong Kong	21.5451	115.497	1 = Radiocarbon	6240	90	6495	287	277	transgressive	1.45	nd	1	-115.476	YSD	0.568653	0.568653	-1	5 = Sedimentary (e.g., deltaic, estuarine, wetland, lacustrine, marine facies)	Transgressive contact (nearshore)	Shallow-water benthonic bethic foraminifera including Ammonia beccarii var., Elphidium advenum (Cushman),	<HAT	-116.527	0.596461	0.596461	nd	nd	nd	nd	0	0	#REF!
GIFA-101409	Yim, 2006	9a	Hong Kong	21.4617	115.588	1 = Radiocarbon	11760	130	13093	317	332	transgressive	0.625	nd	1	-118.656	YSD	0.54734	0.54734	-1	5 = Sedimentary (e.g., deltaic, estuarine, wetland, lacustrine, marine facies)	Transgressive contact (nearshore)	Shallow-water benthonic bethic foraminifera including Ammonia beccarii var., Elphidium advenum (Cushman),	<HAT	-119.602	0.576178	0.576178	nd	nd	nd	nd	0	0	#REF!
GIFA-102053	Yim, 2006	9a	Hong Kong	21.4617	115.588	1 = Radiocarbon	9050	90	9607	359	315	transgressive	0.875	nd	1	-118.906	YSD	0.547477	0.547477	-1	5 = Sedimentary (e.g., deltaic, estuarine, wetland, lacustrine, marine facies)	Transgressive contact (nearshore)	Shallow-water benthonic bethic foraminifera including Ammonia beccarii var., Elphidium advenum (Cushman),	<HAT	-119.852	0.576308	0.576308	nd	nd	nd	nd	0	0	#REF!
KWG-123	Huang et al. 1986; Li et al 1991	9a	E_PRD	23.1597	113.929	1 = Radiocarbon	7750.68	102.093	8049	288	283	nd	nd	nd	0	2	YSD	0.514879	0.514879	1	4 = Archeological	Shell mount	Archaeology	>MHHW	0.873353	0.677274	0.677274	nd	nd	nd	nd	0	0	#REF!
KWG-216	Huang et al. 1986; Li et al, 1991	9a	E_PRD	22.751	113.899	1 = Radiocarbon	5900.68	203.035	6127	489	486	regressive	11	nd	1	-13.8	YSD	0.577495	0.577495	-1	5 = Sedimentary (e.g., deltaic, estuarine, wetland, lacustrine, marine facies)	Subtidal deposit	Oyster shell muddy sediment (author interpretation only)	<MTL	-13.7678	0.579655	0.579655	nd	nd	nd	nd	0	0	#REF!
KWG-171	Huang et al. 1986	9a	E_PRD	22.751	113.899	1 = Radiocarbon	5610.68	178.67	5819	446	417	regressive	10.4	nd	1	-12.2	YSD	0.573031	0.573031	-1	5 = Sedimentary (e.g., deltaic, estuarine, wetland, lacustrine, marine facies)	Subtidal deposit	Oyster shell muddy sediment (author interpretation only)	<MTL	-12.1678	0.575208	0.575208	nd	nd	nd	nd	0	0	#REF!
ZK-103	Li et al., 1991; Xiong et al. 2020	9a	E_PRD	23.2012	113.85	1 = Radiocarbon	4310.68	106.527	4256	370	378	transgressive	nd	nd	1	1.1	YSD	0.514879	0.514879	1	4 = Archeological	Shell mount	Archaeology	>MHHW	-0.0198333	0.677274	0.677274	nd	nd	nd	nd	0	0	#REF!
KWG-222	Huang et al. 1983; Zong 2004	9a	E_PRD	22.7667	113.817	1 = Radiocarbon	1488.81	128.314	1393	304	266	regressive	2.4	7.5	1	-1.1	YSD	0.536101	0.536101	0	5 = Sedimentary (e.g., deltaic, estuarine, wetland, lacustrine, marine facies)	Tidal flat deposit	sediment texture, mollusc fossil	HAT-LAT	-0.655747	3.0379	3.0379	nd	nd	nd	nd	0	0	#REF!
KWG-175	Xu et al. 1983; Huang et al. 1983; Zong 2004	9a	E_PRD	22.6667	113.8	1 = Radiocarbon	1158.81	134.776	1075	227	284	transgressive	1.55	nd	1	-3.6	YSD	0.534847	0.534847	-1	5 = Sedimentary (e.g., deltaic, estuarine, wetland, lacustrine, marine facies)	Subtidal deposit	sediment texture and diatom assemblage	<MTL	-3.5625	0.537179	0.537179	nd	nd	nd	nd	0	0	#REF!
KWG-176	Xu et al. 1983; Huang et al. 1983; Zong 2004	9a	E_PRD	22.6667	113.8	1 = Radiocarbon	668.811	122.33	632	270	154	transgressive	0.8	nd	1	-2.8	YSD	0.534187	0.534187	-1	5 = Sedimentary (e.g., deltaic, estuarine, wetland, lacustrine, marine facies)	Subtidal deposit	sediment texture and diatom assemblage	<MTL	-2.7625	0.536522	0.536522	nd	nd	nd	nd	0	0	#REF!
KWG-232	Huang et al. 1986	9a	E_PRD	22.7545	113.791	1 = Radiocarbon	6085.36	190.646	6950	468	453	regressive	12.2	nd	1	-6.9	YSD	0.587057	0.587057	0	5 = Sedimentary (e.g., deltaic, estuarine, wetland, lacustrine, marine facies)	Mangrove deposit	Mangrove peat in core S2 based on author interpretation	HAT-MTL	-8.05271	1.62154	1.62154	nd	nd	nd	nd	0	0	#REF!
KWG-170	Huang et al. 1983; Zong 2004	9a	E_PRD	22.75	113.783	1 = Radiocarbon	2430.68	106.527	1914	364	324	regressive	nd	nd	1	-4.1	YSD	0.570175	0.570175	-1	5 = Sedimentary (e.g., deltaic, estuarine, wetland, lacustrine, marine facies)	Marine deposit	Sediment texture, grain size, microfossil, geochemistry	<MTL	-4.06708	0.572364	0.572364	nd	nd	nd	nd	0	0	#REF!
KWG-227	Huang et al. 1983; Zong 2004	9a	E_PRD	22.75	113.783	1 = Radiocarbon	818.811	116.895	756	199	201	transgressive	0	0.5	1	1	YSD	0.533948	0.533948	1	5 = Sedimentary (e.g., deltaic, estuarine, wetland, lacustrine, marine facies)	Brackish to freshwater swamp deposit	field observation	>MTL	1.03292	0.536284	0.536284	nd	nd	nd	nd	0	0	#REF!
KWG-167	Xu et al. 1985; Li et al. 1991; Zong 2004	9a	E_PRD	22.8	113.75	1 = Radiocarbon	3598.81	148.878	3913	468	420	0	1.4	nd	1	-4.7	YSD	0.534681	0.534681	-1	5 = Sedimentary (e.g., deltaic, estuarine, wetland, lacustrine, marine facies)	Subtidal deposit	sediment texture and diatom assemblage	<MTL	-4.66876	0.537014	0.537014	nd	nd	nd	nd	0	0	#REF!
KWG-172	Xu et al. 1985; Li et al. 1991; Zong 2004	9a	E_PRD	22.7667	113.75	1 = Radiocarbon	988.811	116.895	892	283	210	transgressive	0.8	nd	1	-3.9	YSD	0.534187	0.534187	-1	5 = Sedimentary (e.g., deltaic, estuarine, wetland, lacustrine, marine facies)	Subtidal deposit	sediment texture and diatom assemblage	<MTL	-3.86731	0.536522	0.536522	nd	nd	nd	nd	0	0	#REF!
KWG-173	Xu et al. 1985; Li et al. 1991; Zong 2004	9a	E_PRD	22.8	113.75	1 = Radiocarbon	6058.81	180.456	6302	456	437	transgressive	2.02	nd	1	-5.9	YSD	0.535474	0.535474	-1	5 = Sedimentary (e.g., deltaic, estuarine, wetland, lacustrine, marine facies)	Subtidal deposit	sediment texture and diatom assemblage	<MTL	-5.86876	0.537803	0.537803	nd	nd	nd	nd	0	0	#REF!
DGST1	Huang et al. 1986	9a	E_PRD	22.9188	113.62	1 = Radiocarbon	1443.95	94.532	1347	185	170	regressive	3.02	nd	1	-3.5	YSD	0.537353	0.537353	-1	5 = Sedimentary (e.g., deltaic, estuarine, wetland, lacustrine, marine facies)	Marine deposit	Rotten wood and muddy sediment (author interpretation only)	<MTL	-3.49482	0.539674	0.539674	nd	nd	nd	nd	0	0	#REF!
KWG-100	Li et al. 1991; Zong 2004	9a	E_PRD	23.0667	113.617	1 = Radiocarbon	2698.81	180.456	2818	500	468	transgressive	1.6	31	1	0.6	YSD	0.534906	0.534906	0	5 = Sedimentary (e.g., deltaic, estuarine, wetland, lacustrine, marine facies)	Tidal flat deposit	sediment texture and diatom assemblage	HAT-LAT	0.588301	2.3859	2.3859	nd	nd	nd	nd	0	0	#REF!
KWG-700	Li et al 1991; Zong et al. 2013	9a	E_PRD	22.9341	113.484	1 = Radiocarbon	3871.28	138.268	4285	514	390	transgressive	10.7	nd	1	-10.2	YSD	0.575236	0.575236	-1	5 = Sedimentary (e.g., deltaic, estuarine, wetland, lacustrine, marine facies)	Tide-influenced environment	Diatoms are dominated by brackish plantonic species >85%	<MTL	-10.1765	0.577405	0.577405	nd	nd	nd	nd	0	0	#REF!
KWG-796	Li et al 1991; Zong et al. 2013	9a	E_PRD	22.9341	113.484	1 = Radiocarbon	2351.28	134.881	2410	332	353	transgressive	6.8	nd	1	-3.5	YSD	0.550995	0.550995	-1	5 = Sedimentary (e.g., deltaic, estuarine, wetland, lacustrine, marine facies)	Subtidal deposit	Clay, organic matter	<MTL	-3.4765	0.553259	0.553259	nd	nd	nd	nd	0	0	#REF!
KWG-693	Li et al 1991; Zong 2004; Zong et al. 2013	9a	E_PRD	22.93	113.35	1 = Radiocarbon	1700.68	80.92	1105	239	253	regressive	3.9	11.4	1	-2.7	YSD	0.539615	0.539615	-1	5 = Sedimentary (e.g., deltaic, estuarine, wetland, lacustrine, marine facies)	Subtidal deposit	sediment texture and diatom assemblage	<MTL	-2.65494	0.541926	0.541926	nd	nd	nd	nd	0	0	#REF!
KWG-690	Li et al 1991; Zong 2004; Zong et al. 2013	9a	E_PRD	22.9333	113.35	1 = Radiocarbon	2820.68	102.093	2409	319	338	regressive	5.9	9.4	1	-4.7	YSD	0.546831	0.546831	-1	5 = Sedimentary (e.g., deltaic, estuarine, wetland, lacustrine, marine facies)	Subtidal deposit	sediment texture and diatom assemblage	<MTL	-4.65504	0.549112	0.549112	nd	nd	nd	nd	0	0	#REF!
KWG-890	Li et al 1991	9a	E_PRD	22.933	113.35	1 = Radiocarbon	7421.28	172.316	8225	359	350	regressive	nd	nd	1	-13.9	YSD	0.570175	0.570175	-1	5 = Sedimentary (e.g., deltaic, estuarine, wetland, lacustrine, marine facies)	Tidal channel deposit	Sediment texture, grain size, microfossil, geochemistry	<HAT	-15.8288	0.597913	0.597913	nd	nd	nd	nd	0	0	#REF!
KWG-62	Li et al 1982; Zong 2004	9a	W_PRD	22.6667	113.583	1 = Radiocarbon	1638.81	128.314	1530	289	230	regressive	4.3	11.4	1	-4.3	YSD	0.540829	0.540829	-1	5 = Sedimentary (e.g., deltaic, estuarine, wetland, lacustrine, marine facies)	Subtidal deposit	sediment texture, mollusc fossil	<MTL	-4.26514	0.543135	0.543135	nd	nd	nd	nd	0	0	#REF!
KWG-13	Huang et al. 1982; Li et al. 1991; Zong 2004	9a	W_PRD	22.3	113.55	1 = Radiocarbon	1548.81	134.776	1452	272	275	regressive	2.6	6.1	1	-1.4	YSD	0.536474	0.536474	-1	5 = Sedimentary (e.g., deltaic, estuarine, wetland, lacustrine, marine facies)	Tidal influence environemnt	sediment color, texture	<HAT	-2.8197	0.565866	0.565866	nd	nd	nd	nd	0	0	#REF!
GZ2088	Zong et al. 2013; Yang et al. 2012	9a	W_PRD	22.7056	113.514	1 = Radiocarbon	1175	105.304	1094	205	258	transgressive	2.4	nd	1	-1.9	YSD	0.513055	0.513055	-1	5 = Sedimentary (e.g., deltaic, estuarine, wetland, lacustrine, marine facies)	Argriculture land	Clay, organic matter	<MTL	-1.86784	0.515485	0.515485	nd	nd	nd	nd	0	Zong 2009 indicated location of core GZ-2 as a subaqueous delta front environment.	#REF!
GZ2089	Zong et al. 2013; Yang et al. 2012	9a	W_PRD	22.7056	113.514	1 = Radiocarbon	1817	104.12	1721	270	299	transgressive	6.8	nd	1	-6.3	YSD	0.513055	0.513055	-1	5 = Sedimentary (e.g., deltaic, estuarine, wetland, lacustrine, marine facies)	Argriculture land	Clay, organic matter	<MTL	-6.26784	0.515485	0.515485	nd	nd	nd	nd	0	Zong 2009 indicated location of core GZ-2 as a subaqueous delta front environment.	#REF!
GZ2090	Zong et al. 2013; Yang et al. 2012	9a	W_PRD	22.7056	113.514	1 = Radiocarbon	2452	107.703	2531	227	347	transgressive	10.5	nd	1	-10	YSD	0.513055	0.513055	-1	5 = Sedimentary (e.g., deltaic, estuarine, wetland, lacustrine, marine facies)	Subtidal deposit	Clay, organic matter	<MTL	-9.96784	0.515485	0.515485	nd	nd	nd	nd	0	Zong 2009 indicated location of core GZ-2 as a subaqueous delta front environment.	#REF!
GZ2091	Zong et al. 2013; Yang et al. 2012	9a	W_PRD	22.7056	113.514	1 = Radiocarbon	3698	103.846	4045	358	318	transgressive	12.8	nd	1	-12.3	YSD	0.513055	0.513055	-1	5 = Sedimentary (e.g., deltaic, estuarine, wetland, lacustrine, marine facies)	Subtidal deposit	Clay, organic matter	<MTL	-12.2678	0.515485	0.515485	nd	nd	nd	nd	0	Zong 2009 indicated location of core GZ-2 as a subaqueous delta front environment.	#REF!
KWG-179	Xu et al. 1983; Li et al. 1991; Zong 2004	9a	W_PRD	22.35	113.45	1 = Radiocarbon	1650.68	102.093	1055	262	289	transgressive	0.85	nd	1	-4.4	YSD	0.534218	0.534218	-1	5 = Sedimentary (e.g., deltaic, estuarine, wetland, lacustrine, marine facies)	Subtidal deposit	sediment texture and diatom assemblage	<MTL	-4.37209	0.536553	0.536553	nd	nd	nd	nd	0	0	#REF!
ZSSX1	Huang et al. 1981; Huang et al., 1986	9a	W_PRD	22.3572	113.442	1 = Radiocarbon	1650.68	102.093	1055	262	289	regressive	2.5	nd	1	-1.2	YSD	0.512445	0.512445	0	5 = Sedimentary (e.g., deltaic, estuarine, wetland, lacustrine, marine facies)	Shell hash	author interpretation only	HAT-LAT	-1.07101	1.71246	1.71246	nd	nd	nd	nd	0	Chacterised as shell hash formed in intertidal zone in Huang 1986. Only general discription for all samples in original studies, no sketch, figure, other analysis.	#REF!
GC-480	Huang et al. 1981	9a	W_PRD	22.5295	113.438	1 = Radiocarbon	5420.68	254.604	5610	595	642	regressive	2	na	1	0.2	YSD	0.514879	0.514879	-1	5 = Sedimentary (e.g., deltaic, estuarine, wetland, lacustrine, marine facies)	Oyster shell layer (reef)	1.6 m think of oyster shell (Ostrea rivularis; O. plicatula; O gigas) accumulation	<MTL	0.231469	0.517301	0.517301	nd	nd	nd	nd	0	0	#REF!
KWG-40	Huang et al. 1983	9a	W_PRD	22.6796	113.423	1 = Radiocarbon	6180.68	176.7	6437	444	447	regressive	9	8.7	1	-7.4	YSD	0.563471	0.563471	-1	5 = Sedimentary (e.g., deltaic, estuarine, wetland, lacustrine, marine facies)	Subtidal deposit	sediment texture, mollusc fossil	<MTL	-7.3684	0.565685	0.565685	nd	nd	nd	nd	0	0	#REF!
KWG-46	Huang et al. 1982	9a	W_PRD	22.8445	113.391	1 = Radiocarbon	5048.81	201.716	5802	473	475	transgressive	9.7	3.5	1	-8.9	YSD	0.568099	0.568099	-1	5 = Sedimentary (e.g., deltaic, estuarine, wetland, lacustrine, marine facies)	Subtidal deposit	sediment texture, mollusc fossil	<MTL	-8.89001	0.570295	0.570295	nd	nd	nd	nd	0	0	#REF!
KWG-99	Li et al 1991	9a	W_PRD	22.5729	113.39	1 = Radiocarbon	4738.81	156.411	5445	441	468	na	na	na	1	-5.9	YSD	0.570175	0.570175	-1	5 = Sedimentary (e.g., deltaic, estuarine, wetland, lacustrine, marine facies)	Subtidal deposit	sediment texture	<MTL	-5.86789	0.572364	0.572364	nd	nd	nd	nd	0	0	#REF!
KWG-48	Huang et al. 1982; Zong 2004	9a	W_PRD	22.45	113.383	1 = Radiocarbon	1418.81	122.33	1324	243	264	regressive	3	16.2	1	-2.2	YSD	0.537308	0.537308	-1	5 = Sedimentary (e.g., deltaic, estuarine, wetland, lacustrine, marine facies)	Subtidal deposit	sediment texture and pollen assemblage	<MTL	-2.17186	0.53963	0.53963	nd	nd	nd	nd	0	0	#REF!
KWG-43	Huang et al. 1982; Li et al 1991; Zong 2004	9a	W_PRD	22.85	113.383	1 = Radiocarbon	2070.68	102.093	1492	319	275	regressive	4	6.1	1	-6.7	YSD	0.539907	0.539907	-1	5 = Sedimentary (e.g., deltaic, estuarine, wetland, lacustrine, marine facies)	Subtidal deposit	sediment texture, mollusc fossil	<MTL	-6.6901	0.542218	0.542218	nd	nd	nd	nd	0	0	#REF!
DMDLS1	Huang et al. 1986; Li et al 1991	9a	W_PRD	22.2179	113.372	1 = Radiocarbon	8440.68	228.742	8848	595	557	regressive	16.1	nd	1	-54.7	YSD	0.623525	0.623525	-1	5 = Sedimentary (e.g., deltaic, estuarine, wetland, lacustrine, marine facies)	Subtidal deposit	Shell-bearing muddy sediment (author interpretation only)	<MTL	-54.6704	0.625527	0.625527	nd	nd	nd	nd	0	0	#REF!
KWG-86	Huang et al. 1981	9a	W_PRD	22.5167	113.35	1 = Radiocarbon	5410.68	157.553	5605	412	417	na	2.5	17	1	-1.4	YSD	0.536284	0.536284	-1	5 = Sedimentary (e.g., deltaic, estuarine, wetland, lacustrine, marine facies)	Oyster shell layer	sediment texture, mollusc fossil	<MTL	-1.3692	0.538609	0.538609	nd	nd	nd	nd	0	0	#REF!
KWG-155	Li et al 1991	9a	W_PRD	22.5167	113.35	1 = Radiocarbon	5830.68	129.318	6056	336	355	na	7.6	13	1	-6	YSD	0.555161	0.555161	-1	5 = Sedimentary (e.g., deltaic, estuarine, wetland, lacustrine, marine facies)	Subtidal deposit	sediment texture, mollusc fossil	<MTL	-5.9692	0.557408	0.557408	nd	nd	nd	nd	0	0	#REF!
GC-477	Huang et al. 1981; Huang et al. 1982	9a	W_PRD	22.8333	113.283	1 = Radiocarbon	6310.68	303.847	6581	681	680	transgressive	0.5	nd	1	-0.5	YSD	0.534041	0.534041	-1	5 = Sedimentary (e.g., deltaic, estuarine, wetland, lacustrine, marine facies)	Subtidal deposit	sediment texture, mollusc fossil	<MTL	-0.498582	0.536377	0.536377	nd	nd	nd	nd	0	0	#REF!
KWG-98	Huang et al. 1983; Li et al. 1991; Zong 2004	9a	W_PRD	22.8333	113.283	1 = Radiocarbon	6940.68	157.553	7254	349	396	regressive	10	18	1	-8.4	YSD	0.570175	0.570175	-1	5 = Sedimentary (e.g., deltaic, estuarine, wetland, lacustrine, marine facies)	Subtidal deposit	sediment texture, mollusc fossil	<MTL	-8.39858	0.572364	0.572364	nd	nd	nd	nd	0	0	#REF!
RH-?	Huang et al. 1982; Li et al 1991; Zong 2004	9a	W_PRD	22.7167	113.25	1 = Radiocarbon	7855.36	191.953	8719	551	495	transgressive	20.7	0.2	0	-22.6	YSD	0.154596	0.675645	-1	5 = Sedimentary (e.g., deltaic, estuarine, wetland, lacustrine, marine facies)	Subtidal deposit	sediment texture	<MTL	-22.5988	0.162481	0.162481	nd	nd	nd	nd	0	0	#REF!
GC-483	Huang et al. 1982	9a	W_PRD	22.6742	113.238	1 = Radiocarbon	5330.68	254.604	5506	600	647	na	7.7	13	1	-5.6	YSD	0.555712	0.555712	-1	5 = Sedimentary (e.g., deltaic, estuarine, wetland, lacustrine, marine facies)	Oyster shell layer	sediment texture, mollusc fossil	<MTL	-5.58748	0.557957	0.557957	nd	nd	nd	nd	0	0	#REF!
Beta628986	Lin et al. 2023	9a	W_PRD	22.4832	113.234	1 = Radiocarbon	3450	30	3165	223	245	regressive	8.75	21.25	1	-7.75	YSD	1.03158	1.03158	-1	5 = Sedimentary (e.g., deltaic, estuarine, wetland, lacustrine, marine facies)	Delta front deposit	Lithology and stratigraphic corrolation	<MTL	-7.72151	1.03279	1.03279	nd	nd	nd	nd	0	0	#REF!
Beta628987	Lin et al. 2023	9a	W_PRD	22.4832	113.234	1 = Radiocarbon	5090	30	5250	225	271	regressive	12.75	17.25	1	-11.75	YSD	1.04812	1.04812	-1	5 = Sedimentary (e.g., deltaic, estuarine, wetland, lacustrine, marine facies)	Delta front deposit	Lithology and stratigraphic corrolation	<MTL	-11.7215	1.04931	1.04931	nd	nd	nd	nd	0	0	#REF!
Beta628988	Lin et al. 2023	9a	W_PRD	22.4832	113.234	1 = Radiocarbon	7940	30	8241	184	222	regressive	20.75	9.25	1	-19.75	YSD	1.09807	1.09807	-1	5 = Sedimentary (e.g., deltaic, estuarine, wetland, lacustrine, marine facies)	Estuarine or prodelta deposit	Lithology and stratigraphic corrolation	<MTL	-19.7215	1.0992	1.0992	nd	nd	nd	nd	0	0	#REF!
Beta628989	Lin et al. 2023	9a	W_PRD	22.4832	113.234	1 = Radiocarbon	7820	30	8115	210	188	regressive	23.15	6.85	1	-22.15	YSD	1.11709	1.11709	-1	5 = Sedimentary (e.g., deltaic, estuarine, wetland, lacustrine, marine facies)	Estuarine or prodelta deposit	Lithology and stratigraphic corrolation	<MTL	-22.1215	1.11821	1.11821	nd	nd	nd	nd	0	0	#REF!
STU22001	Lin et al. 2023	9a	W_PRD	22.4832	113.234	3 = Optically stimulated luminescence	n.a.	n.a.	500	30	30	regressive	5.65	24.35	1	-4.65	YSD	1.02318	1.02318	-1	5 = Sedimentary (e.g., deltaic, estuarine, wetland, lacustrine, marine facies)	Delta front deposit	Lithology and stratigraphic corrolation	<MTL	-4.62151	1.0244	1.0244	nd	nd	nd	nd	0	0	#REF!
STU22002	Lin et al. 2023	9a	W_PRD	22.4832	113.234	3 = Optically stimulated luminescence	n.a.	n.a.	1390	90	90	regressive	7.05	22.95	1	-6.05	YSD	1.02665	1.02665	-1	5 = Sedimentary (e.g., deltaic, estuarine, wetland, lacustrine, marine facies)	Delta front deposit	Lithology and stratigraphic corrolation	<MTL	-6.02151	1.02786	1.02786	nd	nd	nd	nd	0	0	#REF!
STU22003	Lin et al. 2023	9a	W_PRD	22.4832	113.234	3 = Optically stimulated luminescence	n.a.	n.a.	3150	160	160	regressive	8.75	21.25	1	-7.75	YSD	1.03187	1.03187	-1	5 = Sedimentary (e.g., deltaic, estuarine, wetland, lacustrine, marine facies)	Delta front deposit	Lithology and stratigraphic corrolation	<MTL	-7.72151	1.03308	1.03308	nd	nd	nd	nd	0	0	#REF!
STU22004	Lin et al. 2023	9a	W_PRD	22.4832	113.234	3 = Optically stimulated luminescence	n.a.	n.a.	2330	130	130	regressive	9.55	20.45	1	-8.55	YSD	1.0347	1.0347	-1	5 = Sedimentary (e.g., deltaic, estuarine, wetland, lacustrine, marine facies)	Delta front deposit	Lithology and stratigraphic corrolation	<MTL	-8.52151	1.03591	1.03591	nd	nd	nd	nd	0	0	#REF!
STU22005	Lin et al. 2023	9a	W_PRD	22.4832	113.234	3 = Optically stimulated luminescence	n.a.	n.a.	3760	200	200	regressive	11.15	18.85	1	-10.15	YSD	1.04108	1.04108	-1	5 = Sedimentary (e.g., deltaic, estuarine, wetland, lacustrine, marine facies)	Delta front deposit	Lithology and stratigraphic corrolation	<MTL	-10.1215	1.04228	1.04228	nd	nd	nd	nd	0	0	#REF!
STU22006	Lin et al. 2023	9a	W_PRD	22.4832	113.234	3 = Optically stimulated luminescence	n.a.	n.a.	3820	190	190	regressive	12.05	17.95	1	-11.05	YSD	1.04509	1.04509	-1	5 = Sedimentary (e.g., deltaic, estuarine, wetland, lacustrine, marine facies)	Estuarine or prodelta deposit	Lithology and stratigraphic corrolation	<MTL	-11.0215	1.04628	1.04628	nd	nd	nd	nd	0	0	#REF!
STU22007	Lin et al. 2023	9a	W_PRD	22.4832	113.234	3 = Optically stimulated luminescence	n.a.	n.a.	4510	240	240	regressive	12.75	17.25	1	-11.75	YSD	1.0484	1.0484	-1	5 = Sedimentary (e.g., deltaic, estuarine, wetland, lacustrine, marine facies)	Estuarine or prodelta deposit	Lithology and stratigraphic corrolation	<MTL	-11.7215	1.0496	1.0496	nd	nd	nd	nd	0	0	#REF!
STU22008	Lin et al. 2023	9a	W_PRD	22.4832	113.234	3 = Optically stimulated luminescence	n.a.	n.a.	5200	300	300	regressive	13.65	16.35	1	-12.65	YSD	1.05293	1.05293	-1	5 = Sedimentary (e.g., deltaic, estuarine, wetland, lacustrine, marine facies)	Estuarine or prodelta deposit	Lithology and stratigraphic corrolation	<MTL	-12.6215	1.05411	1.05411	nd	nd	nd	nd	0	0	#REF!
STU22009	Lin et al. 2023	9a	W_PRD	22.4832	113.234	3 = Optically stimulated luminescence	n.a.	n.a.	4480	230	230	regressive	15.15	14.85	1	-14.15	YSD	1.0611	1.0611	-1	5 = Sedimentary (e.g., deltaic, estuarine, wetland, lacustrine, marine facies)	Estuarine or prodelta deposit	Lithology and stratigraphic corrolation	<MTL	-14.1215	1.06228	1.06228	nd	nd	nd	nd	0	0	#REF!
STU22010	Lin et al. 2023	9a	W_PRD	22.4832	113.234	3 = Optically stimulated luminescence	n.a.	n.a.	7700	400	400	regressive	18.35	11.65	1	-17.35	YSD	1.08112	1.08112	-1	5 = Sedimentary (e.g., deltaic, estuarine, wetland, lacustrine, marine facies)	Estuarine or prodelta deposit	Lithology and stratigraphic corrolation	<MTL	-17.3215	1.08227	1.08227	nd	nd	nd	nd	0	0	#REF!
STU22011	Lin et al. 2023	9a	W_PRD	22.4832	113.234	3 = Optically stimulated luminescence	n.a.	n.a.	7400	400	400	regressive	20.75	9.25	1	-19.75	YSD	1.09834	1.09834	-1	5 = Sedimentary (e.g., deltaic, estuarine, wetland, lacustrine, marine facies)	Estuarine or prodelta deposit	Lithology and stratigraphic corrolation	<MTL	-19.7215	1.09948	1.09948	nd	nd	nd	nd	0	0	#REF!
STU22012	Lin et al. 2023	9a	W_PRD	22.4832	113.234	3 = Optically stimulated luminescence	n.a.	n.a.	7700	400	400	regressive	23.15	6.85	1	-22.15	YSD	1.11736	1.11736	-1	5 = Sedimentary (e.g., deltaic, estuarine, wetland, lacustrine, marine facies)	Estuarine or prodelta deposit	Lithology and stratigraphic corrolation	<MTL	-22.1215	1.11848	1.11848	nd	nd	nd	nd	0	0	#REF!
STU22013	Lin et al. 2023	9a	W_PRD	22.4832	113.234	3 = Optically stimulated luminescence	n.a.	n.a.	6200	300	300	regressive	24.75	5.25	1	-23.75	YSD	1.131	1.131	-1	5 = Sedimentary (e.g., deltaic, estuarine, wetland, lacustrine, marine facies)	Estuarine or prodelta deposit	Lithology and stratigraphic corrolation	<MTL	-23.7215	1.1321	1.1321	nd	nd	nd	nd	0	0	#REF!
STU22014	Lin et al. 2023	9a	W_PRD	22.4832	113.234	3 = Optically stimulated luminescence	n.a.	n.a.	8000	400	400	regressive	25.55	4.45	1	-24.55	YSD	1.13809	1.13809	-1	5 = Sedimentary (e.g., deltaic, estuarine, wetland, lacustrine, marine facies)	Estuarine or prodelta deposit	Lithology and stratigraphic corrolation	<MTL	-24.5215	1.13919	1.13919	nd	nd	nd	nd	0	0	#REF!
STU22015	Lin et al. 2023	9a	W_PRD	22.4832	113.234	3 = Optically stimulated luminescence	n.a.	n.a.	7900	400	400	regressive	26.35	3.65	1	-25.35	YSD	1.14536	1.14536	-1	5 = Sedimentary (e.g., deltaic, estuarine, wetland, lacustrine, marine facies)	Estuarine or prodelta deposit	Lithology and stratigraphic corrolation	<MTL	-25.3215	1.14645	1.14645	nd	nd	nd	nd	0	0	#REF!
PRD05001	Liu et al. 2013	9a	W_PRD	22.5233	113.184	1 = Radiocarbon	1915	200	1852	470	440	regressive	4.5	30.5	1	-3.38	YSD	0.720295	0.720295	1	5 = Sedimentary (e.g., deltaic, estuarine, wetland, lacustrine, marine facies)	Alluvial plain deposit	Interbedded silty sand	>MTL	-3.35148	0.722028	0.722028	nd	nd	nd	nd	1	0	#REF!
PRD05002	Liu et al. 2013	9a	W_PRD	22.5233	113.184	1 = Radiocarbon	2065	180	2030	457	481	regressive	5.5	29.5	1	-4.38	YSD	0.723066	0.723066	1	5 = Sedimentary (e.g., deltaic, estuarine, wetland, lacustrine, marine facies)	Alluvial plain deposit	Interbedded silty sand	>MTL	-4.35148	0.724793	0.724793	nd	nd	nd	nd	1	0	#REF!
PRD05003	Liu et al. 2013	9a	W_PRD	22.5233	113.184	1 = Radiocarbon	2355	150	2412	338	407	regressive	6.5	28.5	1	-5.38	YSD	0.726378	0.726378	1	5 = Sedimentary (e.g., deltaic, estuarine, wetland, lacustrine, marine facies)	Alluvial plain deposit	Interbedded silty sand	>MTL	-5.35148	0.728097	0.728097	nd	nd	nd	nd	1	0
PRD05004	Liu et al. 2013	9a	W_PRD	22.5233	113.184	1 = Radiocarbon	2955	160	3116	335	352	regressive	10.5	24.5	1	-9.38	YSD	0.744866	0.744866	1	5 = Sedimentary (e.g., deltaic, estuarine, wetland, lacustrine, marine facies)	Alluvial plain deposit	Interbedded silty sand	>MTL	-9.35148	0.746542	0.746542	nd	nd	nd	nd	1	0
PRD05005	Liu et al. 2013	9a	W_PRD	22.5233	113.184	1 = Radiocarbon	3681	94	4022	324	299	regressive	11.5	23.5	1	-10.38	YSD	0.75075	0.75075	-1	5 = Sedimentary (e.g., deltaic, estuarine, wetland, lacustrine, marine facies)	Tidal channel deposit	Sandy substrate with foraminifera (A becarii) and ostracod	<HAT	-11.8645	0.772027	0.772027	nd	nd	nd	nd	0	0
PRD05006	Liu et al. 2013	9a	W_PRD	22.5233	113.184	1 = Radiocarbon	5185	115	5953	315	293	regressive	12.5	22.5	1	-11.38	YSD	0.757116	0.757116	-1	5 = Sedimentary (e.g., deltaic, estuarine, wetland, lacustrine, marine facies)	Tidal channel deposit	Sandy substrate with foraminifera (A becarii) and ostracod	<HAT	-12.8645	0.778219	0.778219	nd	nd	nd	nd	0	0
PRD05007	Liu et al. 2013	9a	W_PRD	22.5233	113.184	1 = Radiocarbon	5530	180	6322	407	399	regressive	13	22	1	-11.88	YSD	0.760477	0.760477	-1	5 = Sedimentary (e.g., deltaic, estuarine, wetland, lacustrine, marine facies)	Tidal channel deposit	Sandy substrate with foraminifera (A becarii) and ostracod	<HAT	-13.3645	0.781489	0.781489	nd	nd	nd	nd	0	0
PRD05008	Liu et al. 2013	9a	W_PRD	22.5233	113.184	1 = Radiocarbon	6380	135	7286	279	307	regressive	13.5	21.5	1	-12.38	YSD	0.763954	0.763954	-1	5 = Sedimentary (e.g., deltaic, estuarine, wetland, lacustrine, marine facies)	Tidal channel deposit	Sandy substrate with foraminifera (A becarii) and ostracod	<HAT	-13.8645	0.784873	0.784873	nd	nd	nd	nd	0	0
PRD05009	Liu et al. 2013	9a	W_PRD	22.5233	113.184	1 = Radiocarbon	6450	180	7339	325	390	regressive	15	20	1	-13.88	YSD	0.775065	0.775065	-1	5 = Sedimentary (e.g., deltaic, estuarine, wetland, lacustrine, marine facies)	Estuarine deposit	Foraminifera and ostracod asssemblage	<MTL	-13.8515	0.776676	0.776676	nd	nd	nd	nd	0	0
PRD05010	Liu et al. 2013	9a	W_PRD	22.5233	113.184	1 = Radiocarbon	7000	155	7828	339	255	regressive	16	19	1	-14.88	YSD	0.783023	0.783023	-1	5 = Sedimentary (e.g., deltaic, estuarine, wetland, lacustrine, marine facies)	Estuarine deposit	Foraminifera and ostracod asssemblage	<MTL	-14.8515	0.784618	0.784618	nd	nd	nd	nd	0	0
PRD05011	Liu et al. 2013	9a	W_PRD	22.5233	113.184	1 = Radiocarbon	7570	180	8372	597	393	regressive	18	17	1	-16.88	YSD	0.800203	0.800203	-1	5 = Sedimentary (e.g., deltaic, estuarine, wetland, lacustrine, marine facies)	Estuarine deposit	Foraminifera and ostracod asssemblage	<MTL	-16.8515	0.801764	0.801764	nd	nd	nd	nd	0	0
PRD05012	Liu et al. 2013	9a	W_PRD	22.5233	113.184	1 = Radiocarbon	8640	240	9702	539	670	regressive	20	15	1	-18.88	YSD	0.818978	0.818978	-1	5 = Sedimentary (e.g., deltaic, estuarine, wetland, lacustrine, marine facies)	Estuarine deposit	Foraminifera and ostracod asssemblage	<MTL	-18.8515	0.820503	0.820503	nd	nd	nd	nd	1	0
PRD05013	Liu et al. 2013	9a	W_PRD	22.5233	113.184	1 = Radiocarbon	6640	270	7507	506	564	transgressive	23	12	1	-21.88	YSD	0.849897	0.849897	-1	5 = Sedimentary (e.g., deltaic, estuarine, wetland, lacustrine, marine facies)	Estuarine deposit	Foraminifera and ostracod asssemblage	<MTL	-21.8515	0.851367	0.851367	nd	nd	nd	nd	1	0
PRD05014	Liu et al. 2013	9a	W_PRD	22.5233	113.184	1 = Radiocarbon	7925	195	8795	602	421	transgressive	24.5	10.5	1	-23.38	YSD	0.866502	0.866502	-1	5 = Sedimentary (e.g., deltaic, estuarine, wetland, lacustrine, marine facies)	Estuarine deposit	Foraminifera and ostracod asssemblage	<MTL	-23.3515	0.867943	0.867943	nd	nd	nd	nd	0	0
PRD05015	Liu et al. 2013	9a	W_PRD	22.5233	113.184	1 = Radiocarbon	13380	220	16110	717	640	transgressive	26.5	8.5	1	-25.38	YSD	0.889733	0.889733	1	5 = Sedimentary (e.g., deltaic, estuarine, wetland, lacustrine, marine facies)	Brackish to freshwater swamp deposit, stratigraphic relationship	Abundant plant materia with no microfossilsl	>MTL	-25.3515	0.891137	0.891137	nd	nd	nd	nd	0	0
Zhan9603-1	Zhan et al. 1996	9a	W_PRD	22.097	113.532	1 = Radiocarbon	2490.68	102.093	1989	337	320	regressive	nd	nd	1	1.74	YSD	0.510025	0.510025	1	6 = Sedimentary (e.g., deltaic, estuarine, wetland, lacustrine, marine facies)	Beach ridge	Author interpretation only	>MLLW	2.75545	0.648171	0.648171	nd	nd	nd	nd	0	0
KWG-42	Huang et al. 1982	9a	W_PRD	22.3	113.233	1 = Radiocarbon	6378.81	206.069	7260	395	469	transgressive	16	4	1	-14.9	YSD	0.622495	0.622495	-1	5 = Sedimentary (e.g., deltaic, estuarine, wetland, lacustrine, marine facies)	Subtidal deposit	sediment texture	<MTL	-14.8711	0.6245	0.6245	nd	nd	nd	nd	0	0
Beta-291321	Zong et al 2013	9a	N_PRD	23.0875	112.934	1 = Radiocarbon	2250	40	2230	114	81	transgressive	3.99	nd	1	0.41	YSD	0.538138	0.538138	-1	5 = Sedimentary (e.g., deltaic, estuarine, wetland, lacustrine, marine facies)	Tidally influenced swamp deposit	Freshwater with a small amount of brackish water diatoms	<HAT	-1.27786	0.567444	0.567444	nd	nd	nd	nd	0	0
Beta-291322	Zong et al 2013	9a	N_PRD	23.0875	112.934	1 = Radiocarbon	2160	40	2150	158	147	transgressive	4.61	nd	1	-0.21	YSD	0.540117	0.540117	-1	5 = Sedimentary (e.g., deltaic, estuarine, wetland, lacustrine, marine facies)	Tidally influenced swamp deposit	Freshwater with a small amount of brackish water diatoms	<HAT	-1.89786	0.569321	0.569321	nd	nd	nd	nd	0	0
Beta-291323	Zong et al 2013	9a	N_PRD	23.0875	112.934	1 = Radiocarbon	2560	30	2715	38	200	transgressive	6.92	nd	1	-2.52	YSD	0.54989	0.54989	-1	5 = Sedimentary (e.g., deltaic, estuarine, wetland, lacustrine, marine facies)	Tidally influenced swamp deposit	Freshwater with a small amount of brackish water diatoms	<HAT	-4.20786	0.578601	0.578601	nd	nd	nd	nd	0	0
GC-482	Huang et al. 1982; Zong 2004	9a	W_PRD	22.7	113.2	1 = Radiocarbon	3090.68	157.553	2728	458	434	regressive	3.2	15	1	-2	YSD	0.537769	0.537769	-1	5 = Sedimentary (e.g., deltaic, estuarine, wetland, lacustrine, marine facies)	Subtidal deposit	sediment texture, mollusc fossil	<MTL	-1.99867	0.540089	0.540089	nd	nd	nd	nd	0	0
KWG-52	Huang et al. 1986	9a	W_PRD	22.3732	113.199	1 = Radiocarbon	12010.7	395.883	13411	1133	870	regressive	23.2	nd	1	-12.8	YSD	0.707387	0.707387	-1	5 = Sedimentary (e.g., deltaic, estuarine, wetland, lacustrine, marine facies)	Subtidal deposit	Oyster shell muddy sediment (author interpretation only)	<MTL	-12.7713	0.709152	0.709152	nd	nd	nd	nd	1	0
KWG-901	Li et al 1991	9a	W_PRD	22.7886	113.15	1 = Radiocarbon	8770.68	148.064	9258	416	465	regressive	17	1.2	0	-16.3	YSD	0.633009	0.633009	1	5 = Sedimentary (e.g., deltaic, estuarine, wetland, lacustrine, marine facies)	Fluvial deposit	Fresh water shell and sand	>MTL	-16.2984	0.63498	0.63498	nd	nd	nd	nd	0	0
KWG-87	Huang et al. 1982; Li et al. 1982	9a	W_PRD	22.6484	113.142	1 = Radiocarbon	5180.68	148.064	5344	379	445	na	na	na	1	-1.4	YSD	0.570175	0.570175	-1	5 = Sedimentary (e.g., deltaic, estuarine, wetland, lacustrine, marine facies)	Subtidal deposit	sediment texture, mollusc fossil	<MTL	-1.39865	0.572364	0.572364	nd	nd	nd	nd	0	0
KWG-31	Huang et al. 1982; Zong 2004	9a	W_PRD	22.5	113	1 = Radiocarbon	2378.81	156.279	2441	320	437	regressive	4.5	13.2	1	-3.4	YSD	0.541479	0.541479	-1	5 = Sedimentary (e.g., deltaic, estuarine, wetland, lacustrine, marine facies)	Subtidal deposit	sediment texture and pollen assemblage	<MTL	-3.37131	0.543783	0.543783	nd	nd	nd	nd	0	0
KWG-85	Huang et al. 1982; Zong 2004	9a	W_PRD	22.5	113	1 = Radiocarbon	2900.68	102.093	2502	299	350	regressive	2.5	1.5	1	-1.5	YSD	0.536284	0.536284	-1	5 = Sedimentary (e.g., deltaic, estuarine, wetland, lacustrine, marine facies)	Subtidal deposit	sediment texture, mollusc fossil	<MTL	-1.47131	0.538609	0.538609	nd	nd	nd	nd	0	0
KWG-88	Li et al. 1982; Li et al. 1991; Zong 2004	9a	W_PRD	22.5	113	1 = Radiocarbon	3701.28	110.422	4050	356	324	regressive	nd	nd	1	0.1	YSD	0.570175	0.570175	0	5 = Sedimentary (e.g., deltaic, estuarine, wetland, lacustrine, marine facies)	Saltmarsh deposit	author interpretation only	HAT-MTL	-0.732701	1.10404	1.10404	nd	nd	nd	nd	0	0
TSDH	Huang et al. 1986	9b	W_PRD	22.0794	112.963	1 = Radiocarbon	8483.51	189.815	9469	651	462	regressive	nd	nd	1	-12.5	YSD	0.568331	0.568331	-1	5 = Sedimentary (e.g., deltaic, estuarine, wetland, lacustrine, marine facies)	Marine deposit	Rotten wood and shell-bearing muddy sediment (author interpretation only)	<MTL	-12.4625	0.570526	0.570526	nd	nd	nd	nd	0	0
KWG-104	Li et al. 1991; Zong 2004	9a	N_PRD	23.1167	113.267	1 = Radiocarbon	2710.68	97.7141	2261	366	331	regressive	5	3.5	1	-5	YSD	0.541295	0.541295	-1	5 = Sedimentary (e.g., deltaic, estuarine, wetland, lacustrine, marine facies)	Tidal flat deposit	sediment texture, mollusc fossil	<HAT	-6.48857	0.570438	0.570438	nd	nd	nd	nd	0	0
KWG-109	Li et al 1991; zong 2004	9a	N_PRD	23.1167	113.267	1 = Radiocarbon	2510.68	102.093	2013	326	326	regressive	2.6	18	1	0.08	YSD	0.534513	0.534513	-1	5 = Sedimentary (e.g., deltaic, estuarine, wetland, lacustrine, marine facies)	Tidal flat deposit	author interpretation only	<HAT	-1.60478	0.564007	0.564007	nd	nd	nd	nd	0	Xiong 2018interpreted as tidal flat sediment; Li 1982;1991 described as mud
GZ3927	Zong et al 2013	9a	N_PRD	23.101	113.234	1 = Radiocarbon	2455	103.846	2534	223	221	transgressive	5	nd	1	-1.5	YSD	0.541503	0.541503	-1	5 = Sedimentary (e.g., deltaic, estuarine, wetland, lacustrine, marine facies)	Tidal channel deposit	Muddy substrate; Planktonic diatom assemblage containing both marine-brackish and freshwater taxa	<HAT	-3.84269	0.570636	0.570636	nd	nd	nd	nd	0	0
GZ3928	Zong et al 2013	9a	N_PRD	23.101	113.234	1 = Radiocarbon	2528	104.12	2583	258	236	transgressive	7.8	nd	1	-4.3	YSD	0.554582	0.554582	-1	5 = Sedimentary (e.g., deltaic, estuarine, wetland, lacustrine, marine facies)	Subtidal deposit	Muddy substrate; Marine-brackish planktonic diatom assemblage	<MTL	-4.29464	0.556831	0.556831	nd	nd	nd	nd	0	0
GZ3929	Zong et al 2013	9a	N_PRD	23.101	113.234	1 = Radiocarbon	6429	109.659	7339	229	305	transgressive	12	nd	1	-8.5	YSD	0.583802	0.583802	-1	5 = Sedimentary (e.g., deltaic, estuarine, wetland, lacustrine, marine facies)	Subtidal deposit	Muddy substrate; Marine-brackish planktonic diatom assemblage	<MTL	-8.49464	0.585939	0.585939	nd	nd	nd	nd	0	0
ZK-526a	Li et al. 1991; Xiong et al. 2020	9a	N_PRD	23.0078	113.095	1 = Radiocarbon	5265.68	111.009	5445	318	372	transgressive	2.5	nd	1	1.13	YSD	3.67623	3.67623	1	4 = Archeological	Shell mount	Archaeology	>MHHW	0.322841	3.70247	3.70247	nd	nd	nd	nd	0	0
ZK-526b	Li et al. 1991; Xiong et al. 2020	9a	N_PRD	23.0078	113.095	1 = Radiocarbon	5155.68	138.647	5316	353	432	transgressive	2.5	nd	1	1.13	YSD	3.67623	3.67623	1	4 = Archeological	Shell mount	Archaeology	>MHHW	0.322841	3.70247	3.70247	nd	nd	nd	nd	0	0
ZK-527	Li et al. 1991; Xiong et al. 2020	9a	N_PRD	23.0078	113.095	1 = Radiocarbon	5160.68	111.009	5327	314	372	transgressive	2.5	nd	1	1.13	YSD	3.67623	3.67623	1	4 = Archeological	Shell mount	Archaeology	>MHHW	0.322841	3.70247	3.70247	nd	nd	nd	nd	0	0
ZK-528	Li et al. 1991; Xiong et al. 2020	9a	N_PRD	23.0078	113.095	1 = Radiocarbon	5200.68	111.009	5373	321	368	transgressive	2.5	nd	1	1.13	YSD	3.67623	3.67623	1	4 = Archeological	Shell mount	Archaeology	>MHHW	0.322841	3.70247	3.70247	nd	nd	nd	nd	0	0
ZK-547	Li et al. 1991; Xiong et al. 2020	9a	N_PRD	23.0078	113.095	1 = Radiocarbon	3890.68	111.009	4310	478	332	transgressive	1.6	nd	1	2.03	YSD	3.67623	3.67623	1	4 = Archeological	Shell mount	Archaeology	>MHHW	1.22284	3.70247	3.70247	nd	nd	nd	nd	0	0
ZK-548	Li et al. 1991; Xiong et al. 2020	9a	N_PRD	23.0078	113.095	1 = Radiocarbon	4120.68	111.009	4640	231	344	transgressive	1.6	nd	1	2.03	YSD	3.67623	3.67623	1	4 = Archeological	Shell mount	Archaeology	>MHHW	1.22284	3.70247	3.70247	nd	nd	nd	nd	1	0
KWG-29	Huang et al. 1982; Zhang et al. 1982; Wu 1985	9a	N_PRD	23.1523	113.094	1 = Radiocarbon	5030.68	284.118	5150	694	723	na	na	na	0	3.6	YSD	0.570175	0.570175	0	3 = Fixed biological indicators	Fossil encrusted bivalve	encrusted mollusc fossil	MHHW-MLLW	3.61043	1.16418	1.16418	nd	nd	nd	nd	0	0
KWG-57	Huang et al. 1982; Li et al. 1991; Zong 2004	9a	N_PRD	23.0333	113.017	1 = Radiocarbon	6538.81	197.394	7421	366	432	transgressive	3.9	0	1	-3.8	YSD	0.539615	0.539615	-1	5 = Sedimentary (e.g., deltaic, estuarine, wetland, lacustrine, marine facies)	Lagoon deposit	sediment texture, leave fragments, mollusc fossil	<HAT	-5.47921	0.568844	0.568844	nd	nd	nd	nd	0	0
NHLJ1	Zeng 1981; Huang et al. 1986; Li et al. 1991	9a	N_PRD	22.8274	113	1 = Radiocarbon	7375.68	152.801	7676	339	348	regressive	13.9	nd	1	-0.2	YSD	0.514879	0.514879	-1	5 = Sedimentary (e.g., deltaic, estuarine, wetland, lacustrine, marine facies)	Oyster shell layer	author interpretation only	<MTL	-0.167674	0.517301	0.517301	nd	nd	nd	nd	0	0
ZK-543	Xiong et al. 2020	9a	N_PRD	22.9549	112.97	1 = Radiocarbon	5295.68	111.009	5478	346	339	transgressive	nd	nd	1	2.75	YSD	3.25103	3.25103	1	4 = Archeological	Shell mount	Archaeology	>MHHW	1.91486	3.28067	3.28067	nd	nd	nd	nd	0	0
ZK-544	Xiong et al. 2020	9a	N_PRD	22.9549	112.97	1 = Radiocarbon	5700.68	111.009	5917	307	322	transgressive	nd	nd	1	2.75	YSD	3.25103	3.25103	1	4 = Archeological	Shell mount	Archaeology	>MHHW	1.91486	3.28067	3.28067	nd	nd	nd	nd	0	0
Huang8304	Huang et al. 1982; Li et al 1991	9a	N_PRD	22.92	112.96	1 = Radiocarbon	6255.68	106.527	6513	319	301	regressive	3	20	1	-1.4	YSD	0.537308	0.537308	-1	5 = Sedimentary (e.g., deltaic, estuarine, wetland, lacustrine, marine facies)	Subtidal deposit	Bivalve fossil Meretrix lusoria	<MTL	-1.37066	0.53963	0.53963	nd	nd	nd	nd	1	0
GZ4141	Zong et al 2013	9a	N_PRD	23.0875	112.934	1 = Radiocarbon	2090	20	2048	66	52	transgressive	1.82	nd	1	2.58	YSD	0.533432	0.533432	1	5 = Sedimentary (e.g., deltaic, estuarine, wetland, lacustrine, marine facies)	Flood plain deposit	Termination of bracksih diatom occurance, stable carbon isotope	>MTL	2.60797	0.53577	0.53577	nd	nd	nd	nd	0	0
GZ4142	Zong et al 2013	9a	N_PRD	23.0875	112.934	1 = Radiocarbon	2210	25	2230	90	102	transgressive	3.54	nd	1	0.86	YSD	0.536319	0.536319	1	5 = Sedimentary (e.g., deltaic, estuarine, wetland, lacustrine, marine facies)	Freshwater swamp deposit	Glyptostrobus pensilis	>MTL	0.887969	0.538644	0.538644	nd	nd	nd	nd	0	0
KWG-15	Li et al 1982; Zong 2004	9a	N_PRD	23.44	112.93	1 = Radiocarbon	2301.28	110.422	2323	382	316	regressive	nd	nd	1	0.3	YSD	0.514879	0.514879	1	5 = Sedimentary (e.g., deltaic, estuarine, wetland, lacustrine, marine facies)	Freshwater swamp deposit	Glyptostrobus pensilis (freshwater Pine) wood macrofossils	>MTL	0.339434	0.517301	0.517301	nd	nd	nd	nd	0	0
Beta-289664	Zong et al 2013	9a	N_PRD	23.1681	112.842	1 = Radiocarbon	7690	107.703	8489	282	282	transgressive	7.3	nd	1	-2.5	YSD	0.551852	0.551852	0	5 = Sedimentary (e.g., deltaic, estuarine, wetland, lacustrine, marine facies)	Tidal flat deposit	Diatom assemblage	HAT-LAT	-2.62556	1.74613	1.74613	nd	nd	nd	nd	0	0
Beta-201319	Zong et al. 2013; Xiong et al 2018	9a	N_PRD	23.1681	112.842	1 = Radiocarbon	4800	107.703	5517	336	214	transgressive	2.96	13.02	1	1.84	YSD	0.535471	0.535471	-1	5 = Sedimentary (e.g., deltaic, estuarine, wetland, lacustrine, marine facies)	Lagoon deposit	sediment texture and diatom assemblage	<HAT	0.356179	0.564916	0.564916	nd	nd	nd	nd	0	0
Beta-289665	Xiong et al 2018	9a	N_PRD	23.1681	112.842	1 = Radiocarbon	7480	107.703	8276	175	249	transgressive	9.83	6.15	1	-5.03	YSD	0.566813	0.566813	0	5 = Sedimentary (e.g., deltaic, estuarine, wetland, lacustrine, marine facies)	Tidal flat deposit	sediment texture and diatom assemblage	HAT-LAT	-5.05393	1.66092	1.66092	nd	nd	nd	nd	0	0
Beta-290247	Zong et al. 2013; Xiong et al 2018	9a	N_PRD	23.1681	112.842	1 = Radiocarbon	6580	40	7479	87	53	transgressive	6.32	9.66	1	-1.52	YSD	0.546445	0.546445	0	5 = Sedimentary (e.g., deltaic, estuarine, wetland, lacustrine, marine facies)	Tidal flat deposit	sediment texture and diatom assemblage	HAT-LAT	-1.54393	1.64027	1.64027	nd	nd	nd	nd	0	0
Beta-291320	Zong et al. 2013; Xiong et al 2018	9a	N_PRD	23.1681	112.842	1 = Radiocarbon	6460	50	7367	97	100	transgressive	6	9.98	1	-1.2	YSD	0.545	0.545	0	5 = Sedimentary (e.g., deltaic, estuarine, wetland, lacustrine, marine facies)	Tidal flat deposit	sediment texture and diatom assemblage	HAT-LAT	-1.32595	1.73906	1.73906	nd	nd	nd	nd	0	0
GZ3942	Xiong et al 2018	9a	N_PRD	23.1681	112.842	1 = Radiocarbon	7677	36	8460	82	62	transgressive	12.26	3.72	1	-7.46	YSD	0.585447	0.585447	0	5 = Sedimentary (e.g., deltaic, estuarine, wetland, lacustrine, marine facies)	Tidal flat deposit	sediment texture and diatom assemblage	HAT-LAT	-7.58727	1.76825	1.76825	nd	nd	nd	nd	0	0
GZ3943	Xiong et al 2018	9a	N_PRD	23.1681	112.842	1 = Radiocarbon	7961	35	8836	153	189	transgressive	13.41	2.57	1	-8.61	YSD	0.595446	0.595446	0	5 = Sedimentary (e.g., deltaic, estuarine, wetland, lacustrine, marine facies)	Tidal flat deposit	sediment texture and diatom assemblage	HAT-LAT	-8.73727	1.77798	1.77798	nd	nd	nd	nd	0	0
GZ3944	Xiong et al 2018	9a	N_PRD	23.1681	112.842	1 = Radiocarbon	8037	36	8900	122	172	transgressive	14.67	1.31	1	-9.87	YSD	0.607214	0.607214	0	5 = Sedimentary (e.g., deltaic, estuarine, wetland, lacustrine, marine facies)	Tidal flat deposit	sediment texture and diatom assemblage	HAT-LAT	-9.99751	1.7822	1.7822	nd	nd	nd	nd	0	0
KWG-8	Huang et al. 1982a and b	9a	N_PRD	23.1833	112.8	1 = Radiocarbon	6265.36	331.128	7111	629	714	transgressive	7	0.8	1	-5.3	YSD	0.551996	0.551996	-1	5 = Sedimentary (e.g., deltaic, estuarine, wetland, lacustrine, marine facies)	Tidal influenced environemnt	Brackish and freshwater diatom	<HAT	-6.98915	0.960779	0.960779	nd	nd	nd	nd	0	0
Beta-456813	Fu et al. 2020	9a	N_PRD	23.205	112.742	1 = Radiocarbon	8280	30	9285	132	151	regressive	18.18	9.32	1	-14.44	YSD	0.628355	0.628355	0	5 = Sedimentary (e.g., deltaic, estuarine, wetland, lacustrine, marine facies)	Tidal flat deposit	Dark grey clayey silt with plentiful plant fragments and some bioturbations.	HAT-LAT	-14.5625	1.76781	1.76781	nd	nd	nd	nd	0	0
Beta-456815	Xiong et al 2018; Fu et al. 2020	9a	N_PRD	23.189	112.742	1 = Radiocarbon	8180	107.703	9147	308	370	transgressive	19.25	10.56	1	-15.65	YSD	0.656849	0.656849	0	5 = Sedimentary (e.g., deltaic, estuarine, wetland, lacustrine, marine facies)	Tidal flat deposit	sediment texture and diatom assemblage (Navivula digitoratia, Gopheonema parvulum)	HAT-LAT	-15.773	1.73205	1.73205	nd	nd	nd	nd	0	0
Beta-456816	Xiong et al 2018; Fu et al. 2020	9a	N_PRD	23.189	112.742	1 = Radiocarbon	10200	30	11871	75	120	transgressive	23.71	5.5	1	-20.72	YSD	0.712384	0.712384	1	5 = Sedimentary (e.g., deltaic, estuarine, wetland, lacustrine, marine facies)	Fluvial deposit	Poorly sorted pebbles and gravels with multiple colors	>MTL	-20.6845	0.714136	0.714136	nd	nd	nd	nd	0	0
Beta-456811	Xiong et al 2018; Fu et al. 2020	9a	N_PRD	23.2245	112.74	1 = Radiocarbon	8450	30	9483	47	49	transgressive	23.47	2.13	1	-19.05	YSD	0.709198	0.709198	0	5 = Sedimentary (e.g., deltaic, estuarine, wetland, lacustrine, marine facies)	Tidal flat deposit	sediment texture and diatom assemblage (Navivula avenaca, Diploneis smithii, Gopheonema parvulum)	HAT-LAT	-19.1706	1.79728	1.79728	nd	nd	nd	nd	0	0
Beta-459975	Xiong et al 2018; Fu et al. 2020	9a	N_PRD	23.2245	112.74	1 = Radiocarbon	13030	116.619	15601	347	343	transgressive	25.38	0.43	1	-20.96	YSD	0.735447	0.735447	1	5 = Sedimentary (e.g., deltaic, estuarine, wetland, lacustrine, marine facies)	Fluvial deposit	Poorly sorted pebbles and gravels with multiple colors	>MTL	-20.9239	0.737145	0.737145	nd	nd	nd	nd	0	0
Beta-456814	Xiong et al 2018; Fu et al. 2020	9a	N_PRD	23.2245	112.74	1 = Radiocarbon	8390	50	9420	106	134	regressive	19.63	7.87	1	-15.89	YSD	0.660878	0.660878	0	5 = Sedimentary (e.g., deltaic, estuarine, wetland, lacustrine, marine facies)	Tidal flat deposit	Organic matter, roots, plant fragments	HAT-LAT	-16.0121	1.78025	1.78025	nd	nd	nd	nd	0	0
Beta-470506	Fu et al. 2020	9a	N_PRD	23.2245	112.74	1 = Radiocarbon	940	30	849	72	66	regressive	3.3	18.2	1	1.12	YSD	0.535706	0.535706	1	5 = Sedimentary (e.g., deltaic, estuarine, wetland, lacustrine, marine facies)	Flood plain deposit	Organic matter, roots, plant fragments	>MTL	1.15606	0.538034	0.538034	nd	nd	nd	nd	0	0
Beta-470507	Fu et al. 2020	9a	N_PRD	23.2245	112.74	1 = Radiocarbon	1250	30	1208	68	135	regressive	5.1	16.4	1	-0.68	YSD	0.541322	0.541322	1	5 = Sedimentary (e.g., deltaic, estuarine, wetland, lacustrine, marine facies)	Flood plain deposit	Organic matter, roots, plant fragments	>MTL	-0.643944	0.543626	0.543626	nd	nd	nd	nd	0	0
Beta-470508	Fu et al. 2020	9a	N_PRD	23.2245	112.74	1 = Radiocarbon	3660	30	3985	101	87	regressive	5.81	15.69	1	-1.39	YSD	0.544176	0.544176	-1	5 = Sedimentary (e.g., deltaic, estuarine, wetland, lacustrine, marine facies)	Tidal influenced environemnt (Delta front – flood plain transition)	Diatom assemblage (reduced brackish and predominantly freshwater diatom)	<HAT	-3.08098	0.573173	0.573173	nd	nd	nd	nd	0	0
Beta-470509	Fu et al. 2020	9a	N_PRD	23.2245	112.74	1 = Radiocarbon	4120	30	4651	165	124	regressive	6.67	14.83	1	-2.25	YSD	0.548106	0.548106	-1	5 = Sedimentary (e.g., deltaic, estuarine, wetland, lacustrine, marine facies)	Tidal influenced environemnt (Delta front – flood plain transition)	Diatom assemblage (reduced brackish and predominantly freshwater diatom)	<HAT	-3.94098	0.576906	0.576906	nd	nd	nd	nd	0	0
Beta-476470	Fu et al. 2020	9a	N_PRD	23.2245	112.74	1 = Radiocarbon	6080	30	6937	214	136	regressive	9.68	11.82	1	-5.26	YSD	0.565779	0.565779	-1	5 = Sedimentary (e.g., deltaic, estuarine, wetland, lacustrine, marine facies)	Delta front deposit	Brackish and freshwater planktonic diatom (Coscinodiscus octonarius and Aulacoseira granulata)	<MTL	-5.22394	0.818342	0.818342	nd	nd	nd	nd	0	0
Beta-476471	Fu et al. 2020	9a	N_PRD	23.2245	112.74	1 = Radiocarbon	7800	30	8572	66	107	regressive	16.33	5.17	1	-11.91	YSD	0.623933	0.623933	-1	5 = Sedimentary (e.g., deltaic, estuarine, wetland, lacustrine, marine facies)	Prodelta deposit	Brackish and freshwater planktonic diatom (Coscinodiscus octonarius and Aulacoseira granulata)	<MTL	-11.8739	0.625933	0.625933	nd	nd	nd	nd	0	0
Beta-491057	Fu et al. 2020	9a	N_PRD	23.2245	112.74	1 = Radiocarbon	6780	104.403	7634	201	202	regressive	10.97	10.53	1	-6.55	YSD	0.575119	0.575119	-1	5 = Sedimentary (e.g., deltaic, estuarine, wetland, lacustrine, marine facies)	Delta front deposit	Brackish and freshwater planktonic diatom (Coscinodiscus octonarius and Aulacoseira granulata)	<MTL	-6.51394	0.577288	0.577288	nd	nd	nd	nd	0	0
Beta-470510	Fu et al. 2020	9a	N_PRD	23.1361	112.679	1 = Radiocarbon	250	30	296	131	295	regressive	3.15	nd	1	1.55	YSD	0.535345	0.535345	1	5 = Sedimentary (e.g., deltaic, estuarine, wetland, lacustrine, marine facies)	Flood plain deposit	Yellow (oxidised) mud with bioturbation)	>MTL	1.58636	0.537675	0.537675	nd	nd	nd	nd	0	0
Beta-470511	Fu et al. 2020	9a	N_PRD	23.1361	112.679	1 = Radiocarbon	940	30	849	72	66	regressive	6.54	nd	1	-1.84	YSD	0.547479	0.547479	-1	5 = Sedimentary (e.g., deltaic, estuarine, wetland, lacustrine, marine facies)	Flood plain deposit	Mud with plant fragments	<HAT	-3.53125	0.57631	0.57631	nd	nd	nd	nd	1	0
Beta-458420	Fu et al. 2020	9a	N_PRD	23.1361	112.679	1 = Radiocarbon	1620	30	1480	63	71	regressive	8.44	nd	1	-3.74	YSD	0.55778	0.55778	-1	5 = Sedimentary (e.g., deltaic, estuarine, wetland, lacustrine, marine facies)	Coastal lagoon deposit	Diatom assembklage (brackish and freshwater diatom) with plant fragments	<HAT	-5.43125	0.586104	0.586104	nd	nd	nd	nd	0	0
Beta-458421	Fu et al. 2020	9a	N_PRD	23.1361	112.679	1 = Radiocarbon	1770	30	1652	72	77	regressive	8.98	nd	1	-4.28	YSD	0.561143	0.561143	-1	5 = Sedimentary (e.g., deltaic, estuarine, wetland, lacustrine, marine facies)	Coastal lagoon deposit	Diatom assembklage (brackish and freshwater diatom) with plant fragments	<HAT	-5.97125	0.589306	0.589306	nd	nd	nd	nd	0	0
Beta-458422	Fu et al. 2020	9a	N_PRD	23.1361	112.679	1 = Radiocarbon	2140	30	2115	184	114	regressive	9.85	nd	1	-5.15	YSD	0.566951	0.566951	-1	5 = Sedimentary (e.g., deltaic, estuarine, wetland, lacustrine, marine facies)	Coastal lagoon deposit	Diatom assembklage (brackish and freshwater diatom) with plant fragments	<HAT	-6.84125	0.594839	0.594839	nd	nd	nd	nd	0	0
Beta-470512	Fu et al. 2020	9a	N_PRD	23.1361	112.679	1 = Radiocarbon	2270	30	2241	104	84	regressive	10.51	nd	1	-5.81	YSD	0.571672	0.571672	-1	5 = Sedimentary (e.g., deltaic, estuarine, wetland, lacustrine, marine facies)	Lagoon deposit	Organic matter, roots, plant fragments	<HAT	-7.50125	0.599341	0.599341	nd	nd	nd	nd	0	0
Beta-470513	Fu et al. 2020	9a	N_PRD	23.1361	112.679	1 = Radiocarbon	7190	30	7993	38	53	regressive	10.78	nd	1	-6.08	YSD	0.57368	0.57368	-1	5 = Sedimentary (e.g., deltaic, estuarine, wetland, lacustrine, marine facies)	Subtidal deposit	Increased brackish diatoms in the unit suggests subtidal condition	<MTL	-6.04364	0.636227	0.636227	nd	nd	nd	nd	0	0
Beta-470514	Fu et al. 2020	9a	N_PRD	23.1361	112.679	1 = Radiocarbon	7670	30	8449	89	47	transgressive	11.75	nd	1	-7.05	YSD	0.581249	0.581249	0	5 = Sedimentary (e.g., deltaic, estuarine, wetland, lacustrine, marine facies)	Tidal flat deposit	Organic matter, roots, plant fragments	HAT-LAT	-7.1718	1.70855	1.70855	nd	nd	nd	nd	0	0
Beta-458423	Fu et al. 2020	9a	N_PRD	23.1361	112.679	1 = Radiocarbon	7930	30	8760	222	154	transgressive	12	nd	1	-7.3	YSD	0.583288	0.583288	0	5 = Sedimentary (e.g., deltaic, estuarine, wetland, lacustrine, marine facies)	Tidal flat deposit	Organic matter, roots, plant fragments	HAT-LAT	-7.4218	1.71092	1.71092	nd	nd	nd	nd	0	0
Beta-494998	Fu et al. 2020	9a	N_PRD	23.1478	112.678	1 = Radiocarbon	5870	40	6694	94	130	regressive	3.48	nd	1	0.16	YSD	0.536162	0.536162	-1	5 = Sedimentary (e.g., deltaic, estuarine, wetland, lacustrine, marine facies)	Delta front deposit	Organic matter, roots, plant fragments	<MTL	0.196455	0.538488	0.538488	nd	nd	nd	nd	0	0
Beta-494999	Fu et al. 2020	9a	N_PRD	23.1478	112.678	1 = Radiocarbon	7420	30	8262	70	82	regressive	7.87	nd	1	-4.23	YSD	0.554436	0.554436	-1	5 = Sedimentary (e.g., deltaic, estuarine, wetland, lacustrine, marine facies)	Delta front deposit	Organic matter, roots, plant fragments	<MTL	-4.19354	0.556686	0.556686	nd	nd	nd	nd	0	0
GZ773	Ding et al 2007; Zong et al. 2013	9a	N_PRD	23.2604	112.39	1 = Radiocarbon	2634	32	2753	88	29	transgressive	2.01	nd	1	7.99	YSD	0.533494	0.533494	1	5 = Sedimentary (e.g., deltaic, estuarine, wetland, lacustrine, marine facies)	Freshwater swamp deposit	Glyptostrobus pensilis	>MTL	8.0311	0.535832	0.535832	nd	nd	nd	nd	0	0
GZ774	Ding et al 2007; Zong et al. 2013	9a	N_PRD	23.2604	112.39	1 = Radiocarbon	3305	29	3520	56	67	transgressive	2.21	nd	1	7.79	YSD	0.534021	0.534021	1	5 = Sedimentary (e.g., deltaic, estuarine, wetland, lacustrine, marine facies)	Freshwater swamp deposit	Glyptostrobus pensilis	>MTL	7.8311	0.536357	0.536357	nd	nd	nd	nd	0	0
GZ775	Ding et al 2007; Zong et al. 2013	9a	N_PRD	23.2604	112.39	1 = Radiocarbon	3375	45	3608	205	126	transgressive	2.41	nd	1	7.59	YSD	0.534367	0.534367	1	5 = Sedimentary (e.g., deltaic, estuarine, wetland, lacustrine, marine facies)	Freshwater swamp deposit	Glyptostrobus pensilis	>MTL	7.6311	0.536701	0.536701	nd	nd	nd	nd	0	0
GZ777	Ding et al 2007; Zong et al. 2013	9a	N_PRD	23.2604	112.39	1 = Radiocarbon	3456	28	3721	108	83	transgressive	2.81	nd	1	7.19	YSD	0.535148	0.535148	1	5 = Sedimentary (e.g., deltaic, estuarine, wetland, lacustrine, marine facies)	Freshwater swamp deposit	Glyptostrobus pensilis	>MTL	7.2311	0.537479	0.537479	nd	nd	nd	nd	0	0
GZ779	Ding et al 2007; Zong et al. 2013	9a	N_PRD	23.2604	112.39	1 = Radiocarbon	3537	30	3820	82	121	transgressive	3.21	nd	1	6.79	YSD	0.536047	0.536047	1	5 = Sedimentary (e.g., deltaic, estuarine, wetland, lacustrine, marine facies)	Freshwater swamp deposit	Glyptostrobus pensilis	>MTL	6.8311	0.538374	0.538374	nd	nd	nd	nd	0	0
GZ781	Ding et al 2007; Zong et al. 2013	9a	N_PRD	23.2604	112.39	1 = Radiocarbon	3642	30	3956	127	106	transgressive	3.61	nd	1	6.39	YSD	0.537064	0.537064	1	5 = Sedimentary (e.g., deltaic, estuarine, wetland, lacustrine, marine facies)	Freshwater swamp deposit	Glyptostrobus pensilis	>MTL	6.4311	0.539387	0.539387	nd	nd	nd	nd	0	0
GZ783	Ding et al 2007; Zong et al. 2013	9a	N_PRD	23.2604	112.39	1 = Radiocarbon	3665	30	3994	93	94	transgressive	4.01	nd	1	5.99	YSD	0.538198	0.538198	1	5 = Sedimentary (e.g., deltaic, estuarine, wetland, lacustrine, marine facies)	Freshwater swamp deposit	Glyptostrobus pensilis	>MTL	6.0311	0.540516	0.540516	nd	nd	nd	nd	0	0
GZ785	Ding et al 2007; Zong et al. 2013	9a	N_PRD	23.2604	112.39	1 = Radiocarbon	3813	31	4200	153	110	transgressive	4.41	nd	1	5.59	YSD	0.539448	0.539448	1	5 = Sedimentary (e.g., deltaic, estuarine, wetland, lacustrine, marine facies)	Freshwater swamp deposit	Glyptostrobus pensilis	>MTL	5.6311	0.54176	0.54176	nd	nd	nd	nd	0	0
GZ787	Ding et al 2007; Zong et al. 2013	9a	N_PRD	23.2604	112.39	1 = Radiocarbon	4544	33	5161	156	110	transgressive	4.81	nd	1	5.19	YSD	0.540814	0.540814	1	5 = Sedimentary (e.g., deltaic, estuarine, wetland, lacustrine, marine facies)	Freshwater swamp deposit	Glyptostrobus pensilis	>MTL	5.2311	0.54312	0.54312	nd	nd	nd	nd	0	0
0	0	0	0	0	0	0	0	0	0	0	0	0	0	0	0	0	0	0	0	0	0	0	0	0	0	0	0	0	0	0	0	0	0
0	0	0	0	0	0	0	0	0	0	0	0	0	0	0	0	0	0	0	0	0	0	0	0	0	0	0	0	0	0	0	0	0	0
0	0	0	0	0	0	0	0	0	0	0	0	0	0	0	0	0	0	0	0	0	0	0	0	0	0	0	0	0	0	0	0	0	0
0	0	0	0	0	0	0	0	0	0	0	0	0	0	0	0	0	0	0	0	0	0	0	0	0	0	0	0	0	0	0	0	0	0

## Sheet: Radiocarbon
Unique sample ID	Laboratory code	Number of subsamples	Age (14C a BP)	Age uncertainty (14C a)	Bulk error (14C a)	δ13C (‰)	Assumed or measured	Isotopic fractionation correction (14C a)	Isotopic fractionation uncertainty (14C a)	Corrected age (14C a BP)	Corrected age uncertainty (14C a)	ΔR (14C a)	Reservoir age uncertainty (14C a)	Calibration software	Age (cal a BP)	Age 2σ Uncertainty + (cal a)	Age 2σ Uncertainty - (cal a)	Note
1	2	3	4	5	6	7	8	9	10	11	12	13	14	15	16	17	18
LFA27	LFA27	1	8330	170	100	-1	assumed	390.682	48.198	8720.68	203.035	110	33	IOSCAL	9315	576	565
MF-ML	MF-ML	1	3980	145	100	-1	assumed	390.682	48.198	4370.68	182.614	110	33	IOSCAL	4463	489	516
HDBSS	HDBSS	1	1830	100	100	-23.1	assumed	31.2776	9.6396	1861.28	141.75	n/a	n/a	IOSCAL	1779	342	365
Huang8301	Huang8301	1	2170	85	0	-1	assumed	390.682	48.198	2560.68	97.7141	110	33	IOSCAL	2195	300	306
KWG-1056	KWG-1056	1	3360	120	0	-1	assumed	390.682	48.198	3750.68	129.318	110	33	IOSCAL	3654	388	338
KWG-1057	KWG-1057	1	4340	140	100	-23.25	assumed	28.8106	8.033	4368.81	172.234	110	33	IOSCAL	4461	456	495
KWG-252	KWG-252	1	3860	110	100	-23.25	assumed	28.8106	8.033	3888.81	148.878	n/a	n/a	IOSCAL	4310	503	407
OxA-5400	OxA-5400	1	2025	65	0	nd	nd	n/a	n/a	2025	65	110	33	IOSCAL	1544	204	209
OxA-5401	OxA-5401	1	3575	60	0	nd	nd	n/a	n/a	3575	60	110	33	IOSCAL	3435	216	217
OxA-5402	OxA-5402	1	4870	75	0	nd	nd	n/a	n/a	4870	75	110	33	IOSCAL	5099	225	263
Owen98A	Owen98A	1	4130	50	0	-1	assumed	390.682	438.88	4520.68	441.719	110	33	IOSCAL	4635	1044	1127
KWG-286	KWG-286	1	5980	180	0	-29	assumed	-66.0474	28.9188	5913.95	182.308	n/a	n/a	IOSCAL	6750	415	435
HAR-868	HAR-868	1	6640	100	0	-27.7	measured	-44.5522	28.9188	6595.45	104.098	n/a	n/a	IOSCAL	7486	178	174
HAR-869	HAR-869	1	7830	140	0	-29.2	measured	-69.3569	28.9188	7760.64	142.956	n/a	n/a	IOSCAL	8580	417	252
HAR-870	HAR-870	1	7790	90	0	-1	measured	390.682	438.88	8180.68	448.013	110	33	IOSCAL	8685	1067	1028
HAR-871	HAR-871	1	7920	110	0	-2.3	measured	369.762	417.96	8289.76	432.192	110	33	IOSCAL	8806	1076	992
CS-619	CS-619	1	8080	130	0	-1	assumed	390.682	438.88	8470.68	457.729	110	33	IOSCAL	9021	1152	1063
ANU-76214	ANU-76214	1	4217	33	0	nd	nd	n/a	n/a	4217	33	110	33	IOSCAL	4266	186	200
ANU-76216	ANU-76216	1	3827	27	0	nd	nd	n/a	n/a	3827	27	110	33	IOSCAL	3746	178	185
YASIC-66120.1.1	YASIC-66120.1.1	1	3489	19	0	nd	nd	n/a	n/a	3489	19	110	33	IOSCAL	3332	144	162
YASIC-66121.1.1	YASIC-66121.1.1	1	4960	21	0	nd	nd	n/a	n/a	4960	21	110	33	IOSCAL	5213	193	189
YASIC-66122.1.1	YASIC-66122.1.1	1	4975	23	0	nd	nd	n/a	n/a	4975	23	110	33	IOSCAL	5233	190	191
YASIC-66123.1.1	YASIC-66123.1.1	1	5110	24	0	nd	nd	n/a	n/a	5110	24	110	33	IOSCAL	5391	167	136
Beta-145816	Beta-145816	1	5140	50	0	nd	nd	n/a	n/a	5140	50	110	33	IOSCAL	5420	173	177
GF9379	GF9379	1	610	50	100	-24	assumed	16.4695	46.9949	626.47	121.279	n/a	n/a	IOSCAL	605	186	275
GF9380	GF9380	1	610	50	0	-1	assumed	390.682	438.88	1000.68	441.719	110	33	IOSCAL	594	711	593
I-8830	I-8830	1	5455	105	0	-29	assumed	-66.0474	-37.1286	5388.95	111.371	n/a	n/a	IOSCAL	6161	232	231
GIF-4813	GIF-4813	1	7020	160	0	-1	assumed	391	438.88	7411	467.135	110	33	IOSCAL	7831	1097	992
GIF-4558	GIF-4558	1	6580	130	0	-1	assumed	390.682	438.88	6970.68	457.729	110	33	IOSCAL	7361	960	981
OxA-5406	OxA-5406	1	825	65	0	nd	nd	n/a	n/a	825	65	110	33	IOSCAL	386	161	192
OxA-5407	OxA-5407	1	3935	65	0	nd	nd	n/a	n/a	3935	65	110	33	IOSCAL	3890	246	245
OxA-5408	OxA-5408	1	5425	85	0	nd	nd	n/a	n/a	5425	85	110	33	IOSCAL	5724	224	245
OxA-5409	OxA-5409	1	8920	90	0	nd	nd	n/a	n/a	8920	90	110	33	IOSCAL	9559	315	256
OxA-5410	OxA-5410	1	9310	80	0	nd	nd	n/a	n/a	9310	80	110	33	IOSCAL	10073	271	312
GIF-4387	GIF-4387	1	6520	130	0	-29	assumed	-66.0474	-37.1286	6453.95	135.198	n/a	n/a	IOSCAL	7355	227	336
KWG-406	KWG-406	1	8520	270	100	-28.3	assumed	-54.4695	12.8528	8465.53	288.21	n/a	n/a	IOSCAL	9452	747	800
KWG-407	KWG-407	1	8600	270	0	-29	assumed	-66.0474	12.8528	8533.95	270.306	n/a	n/a	IOSCAL	9550	690	770
I-8269	I-8269	1	8785	125	0	-29	assumed	-66.0474	28.9188	8718.95	128.302	n/a	n/a	IOSCAL	9766	401	238
GIF-5243	GIF-5243	1	7970	150	0	-1	assumed	390.682	438.88	8360.68	463.805	110	33	IOSCAL	8892	1182	1046
I-10059	I-10059	1	5520	110	0	-1	assumed	390.682	438.88	5910.68	452.455	110	33	IOSCAL	6249	1012	976
HAR-3586	HAR-3586	1	3360	80	0	-1	assumed	390.682	438.88	3750.68	446.112	110	33	IOSCAL	3676	1151	1101
Si86-123	Si86-123	1	5475	155	0	-27.1	assumed	-34.641	27.3122	5440.36	157.388	n/a	n/a	IOSCAL	6215	405	315
SI86-124	SI86-124	1	5093	130	0	-27.1	assumed	-34.641	27.3122	5058.36	132.838	n/a	n/a	IOSCAL	5803	377	317
SI86-121	SI86-121	1	520	112	0	-24	assumed	16.4695	30.5254	536.47	116.085	n/a	n/a	IOSCAL	548	133	234
KWG-211	KWG-211	1	5090	160	0	-1	assumed	390.682	48.198	5480.68	167.102	110	33	IOSCAL	5785	408	378
GF927	GF927	1	3220	95	100	-24	assumed	16.4695	46.9949	3236.47	145.717	n/a	n/a	IOSCAL	3461	373	385
GF931	GF931	1	3160	100	100	-24	assumed	16.4695	46.9949	3176.47	149.025	n/a	n/a	IOSCAL	3383	437	417
GF932	GF932	1	6670	130	0	-27.1	assumed	-34.641	-7.32881	6635.36	130.206	n/a	n/a	IOSCAL	7514	209	245
KWG-160	KWG-160	1	5530	160	0	-1	assumed	390.682	48.198	5920.68	167.102	110	33	IOSCAL	6257	403	385
Owen95A	Owen95A	1	3950	95	0	-1	assumed	390.682	438.88	4340.68	449.044	110	33	IOSCAL	4412	1116	1100
Owen95B	Owen95B	1	7840	120	0	-1	assumed	390.682	438.88	8230.68	454.99	110	33	IOSCAL	8743	1107	1044
KWG-223	KWG-223	1	2530	90	0	-1	assumed	390.682	48.198	2920.68	102.093	110	33	IOSCAL	2635	280	298
Beta-323533	Beta-323533	1	1500	30	0	-2.7	measured	n/a	n/a	1500	30	110	33	IOSCAL	1002	165	155
Beta-341291	Beta-341291	1	970	30	100	-23.7	measured	n/a	n/a	970	104.403	n/a	n/a	IOSCAL	869	305	191
Beta-341292	Beta-341292	1	1080	30	100	-23.2	measured	n/a	n/a	1080	104.403	n/a	n/a	IOSCAL	997	266	247
Beta-323532	Beta-323532	1	1270	30	0	-1	measured	n/a	n/a	1270	30	110	33	IOSCAL	766	145	125
GF928	GF928	1	6760	130	100	-24	assumed	16.4695	46.9949	6776.47	170.612	n/a	n/a	IOSCAL	7639	316	310
SI86-109	SI86-109	1	1900	93	0	-27.1	assumed	-34.641	27.3122	1865.36	96.9276	n/a	n/a	IOSCAL	1780	213	233
GF926	GF926	1	1630	70	0	-29	assumed	-66.0474	28.9188	1563.95	75.7383	n/a	n/a	IOSCAL	1451	233	145
SI86-122	SI86-122	1	3110	185	100	-24	assumed	16.4695	30.5254	3126.47	212.501	n/a	n/a	IOSCAL	3316	514	529
CS-621	CS-621	1	10060	130	100	-28.3	assumed	-54.4695	12.8528	10005.5	164.515	n/a	n/a	IOSCAL	11558	877	456
KWG-241	KWG-241	1	3980	110	0	-1	assumed	390.682	48.198	4370.68	120.096	110	33	IOSCAL	4468	349	351
KWG-178	KWG-178	1	2150	90	100	-23.25	assumed	28.8106	8.033	2178.81	134.776	n/a	n/a	IOSCAL	2165	522	367
KWG-177	KWG-177	1	2896	120	100	-23.25	assumed	28.8106	8.033	2924.81	156.411	n/a	n/a	IOSCAL	3084	360	328
Beta-429246	Beta-429246	1	9290	40	0	-29.4	measured	n/a	n/a	9290	40	n/a	n/a	IOSCAL	10480	161	182
Beta-429245	Beta-429245	1	9230	30	0	-28.7	measured	n/a	n/a	9230	30	n/a	n/a	IOSCAL	10390	110	126
Beta-429247	Beta-429247	1	9350	30	0	-30.6	measured	n/a	n/a	9350	30	n/a	n/a	IOSCAL	10560	101	123
Beta-429249	Beta-429249	1	8910	40	0	-27.1	measured	n/a	n/a	8910	40	n/a	n/a	IOSCAL	10037	153	137
Beta-429248	Beta-429248	1	8880	30	0	-28.7	measured	n/a	n/a	8880	30	n/a	n/a	IOSCAL	10024	152	203
Beta-429255	Beta-429255	1	8570	40	0	-28.4	measured	n/a	n/a	8570	40	n/a	n/a	IOSCAL	9536	121	59
Beta-429256	Beta-429256	1	8710	30	0	-30.1	measured	n/a	n/a	8710	30	n/a	n/a	IOSCAL	9641	238	93
KWG-219	KWG-219	1	6470	180	100	-23.25	assumed	28.8106	8.033	6498.81	206.069	n/a	n/a	IOSCAL	7378	397	476
KWG-186	KWG-186	1	7080	160	100	-23.25	assumed	28.8106	8.033	7108.81	188.851	n/a	n/a	IOSCAL	7931	394	325
KWG-237	KWG-237	1	1280	70	100	-23.25	assumed	28.8106	8.033	1308.81	122.33	n/a	n/a	IOSCAL	1206	205	269
OxA-5428	OxA-5428	1	n/a	n/a	0	-1	assumed	390.682	438.88	390.682	438.88	110	33	IOSCAL	269	531	268
OxA-5429	OxA-5429	1	n/a	n/a	0	-1	assumed	390.682	438.88	390.682	438.88	110	33	IOSCAL	269	531	268
OxA-5430	OxA-5430	1	n/a	n/a	0	-1	assumed	390.682	438.88	390.682	438.88	110	33	IOSCAL	269	531	268
WangPO01	WangPO01	1	2820	95	0	-1	assumed	390.682	438.88	3210.68	449.044	110	33	IOSCAL	2998	1138	1126
WangPO02	WangPO02	1	2380	90	0	-1	assumed	390.682	438.88	2770.68	448.013	110	33	IOSCAL	2457	1070	1081
WangPO03	WangPO03	1	1700	80	0	-1	assumed	390.682	438.88	2090.68	446.112	110	33	IOSCAL	1673	1032	955
WangCC01	WangCC01	1	1300	60	0	-1	assumed	390.682	438.88	1690.68	442.962	110	33	IOSCAL	1236	1016	862
ANU-10154	ANU-10154	1	4480	140	100	nd	nd	n/a	n/a	4480	172.047	n/a	n/a	IOSCAL	5124	459	477
ANU-10155	ANU-10155	1	4540	190	100	nd	nd	n/a	n/a	4540	214.709	n/a	n/a	IOSCAL	5182	523	602
KIA-2287	KIA-2287	1	4740	30	0	nd	nd	n/a	n/a	4740	30	110	33	IOSCAL	4933	242	164
ANU-10156	ANU-10156	1	5440	100	100	nd	nd	n/a	n/a	5440	141.421	n/a	n/a	IOSCAL	6216	314	306
ANU-10157	ANU-10157	1	19430	380	100	nd	nd	n/a	n/a	19430	392.938	n/a	n/a	IOSCAL	23409	825	909
KIA-2290	KIA-2290	1	780	30	0	nd	nd	n/a	n/a	780	30	110	33	IOSCAL	354	139	152
KIA-2291	KIA-2291	1	1880	30	0	nd	nd	n/a	n/a	1880	30	110	33	IOSCAL	1386	149	133
KIA-2292	KIA-2292	1	2940	30	0	nd	nd	n/a	n/a	2940	30	110	33	IOSCAL	2672	159	188
KIA-2293	KIA-2293	1	7490	50	0	nd	nd	n/a	n/a	7490	50	110	33	IOSCAL	7874	159	189
GIFA-101372	GIFA-101372	1	5820	70	0	nd	nd	n/a	n/a	5820	70	110	33	IOSCAL	6149	200	225
GIFA-101373	GIFA-101373	1	9740	100	0	nd	nd	n/a	n/a	9740	100	110	33	IOSCAL	10663	388	336
GIFA-101374	GIFA-101374	1	2150	60	0	nd	nd	n/a	n/a	2150	60	110	33	IOSCAL	1689	220	203
GIFA-101375	GIFA-101375	1	4750	70	0	nd	nd	n/a	n/a	4750	70	110	33	IOSCAL	4952	285	235
GIFA-101376	GIFA-101376	1	2320	45	0	nd	nd	n/a	n/a	2320	45	110	33	IOSCAL	1894	197	188
GIFA-101377	GIFA-101377	1	4040	70	0	nd	nd	n/a	n/a	4040	70	110	33	IOSCAL	4028	264	257
GIFA-101378	GIFA-101378	1	3060	70	0	nd	nd	n/a	n/a	3060	70	110	33	IOSCAL	2814	247	223
GIFA-101379	GIFA-101379	1	830	60	0	nd	nd	n/a	n/a	830	60	110	33	IOSCAL	391	156	179
GIFA-101380	GIFA-101380	1	7710	70	0	nd	nd	n/a	n/a	7710	70	110	33	IOSCAL	8103	217	186
Gif-11683	Gif-11683	1	2840	55	100	nd	nd	n/a	n/a	2840	114.127	n/a	n/a	IOSCAL	2979	343	227
Gif-11689	Gif-11689	1	3385	35	100	nd	nd	n/a	n/a	3385	105.948	n/a	n/a	IOSCAL	3632	256	238
Gif-11686	Gif-11686	1	3920	60	100	nd	nd	n/a	n/a	3920	116.619	n/a	n/a	IOSCAL	4350	455	362
Gif-11676	Gif-11676	1	4690	40	100	nd	nd	n/a	n/a	4690	107.703	n/a	n/a	IOSCAL	5408	193	359
Gif-11682	Gif-11682	1	5420	65	100	nd	nd	n/a	n/a	5420	119.269	n/a	n/a	IOSCAL	6197	241	267
GIFA-101381	GIFA-101381	1	6460	90	0	nd	nd	n/a	n/a	6460	90	110	33	IOSCAL	6852	288	248
Gif-11693	Gif-11693	1	7040	80	100	nd	nd	n/a	n/a	7040	128.062	n/a	n/a	IOSCAL	7859	305	243
Gif-11692	Gif-11692	1	8995	65	100	nd	nd	n/a	n/a	8995	119.269	n/a	n/a	IOSCAL	10085	398	388
Gif-11691	Gif-11691	1	11440	165	100	nd	nd	n/a	n/a	11440	192.938	n/a	n/a	IOSCAL	13323	425	393
GIFA-101382	GIFA-101382	1	9140	100	0	nd	nd	n/a	n/a	9140	100	110	33	IOSCAL	9844	308	308
GIFA-101383	GIFA-101383	1	9120	90	0	nd	nd	n/a	n/a	9120	90	110	33	IOSCAL	9817	306	285
GIFA-101384	GIFA-101384	1	9940	100	0	nd	nd	n/a	n/a	9940	100	110	33	IOSCAL	10937	286	335
GIFA-101385	GIFA-101385	1	10320	100	0	nd	nd	n/a	n/a	10320	100	110	33	IOSCAL	11467	351	302
GIFA-101386	GIFA-101386	1	10170	110	0	nd	nd	n/a	n/a	10170	110	110	33	IOSCAL	11267	404	375
GIFA-101387	GIFA-101387	1	8990	100	0	nd	nd	n/a	n/a	8990	100	110	33	IOSCAL	9651	362	269
Gif-11685	Gif-11685	1	11020	115	100	nd	nd	n/a	n/a	11020	152.398	n/a	n/a	IOSCAL	12947	232	223
GIFA-101388	GIFA-101388	1	10300	100	0	nd	nd	n/a	n/a	10300	100	110	33	IOSCAL	11441	359	291
Gif-11684	Gif-11684	1	12625	145	100	nd	nd	n/a	n/a	12625	176.139	n/a	n/a	IOSCAL	14938	587	734
GIFA-102054	GIFA-102054	1	3730	80	0	nd	nd	n/a	n/a	3730	80	110	33	IOSCAL	3624	256	248
GIFA-101392	GIFA-101392	1	5050	80	0	nd	nd	n/a	n/a	5050	80	110	33	IOSCAL	5323	237	272
GIFA-101395	GIFA-101395	1	1750	60	0	nd	nd	n/a	n/a	1750	60	110	33	IOSCAL	1254	182	197
GIFA-101396	GIFA-101396	1	10280	100	0	nd	nd	n/a	n/a	10280	100	110	33	IOSCAL	11415	358	294
GIFA-101397	GIFA-101397	1	12140	120	0	nd	nd	n/a	n/a	12140	120	110	33	IOSCAL	13602	359	305
GIFA-101398	GIFA-101398	1	9040	100	0	nd	nd	n/a	n/a	9040	100	110	33	IOSCAL	9714	359	268
GIFA-101399	GIFA-101399	1	5390	90	0	nd	nd	n/a	n/a	5390	90	110	33	IOSCAL	5688	239	241
Gif-11678	Gif-11678	1	10440	110	100	nd	nd	n/a	n/a	10440	148.661	n/a	n/a	IOSCAL	12293	420	461
Gif-11674	Gif-11674	1	3050	35	100	nd	nd	n/a	n/a	3050	105.948	n/a	n/a	IOSCAL	3234	230	281
Gif-11677	Gif-11677	1	3690	55	100	nd	nd	n/a	n/a	3690	114.127	n/a	n/a	IOSCAL	4036	368	315
Gif-11687	Gif-11687	1	4945	40	100	nd	nd	n/a	n/a	4945	107.703	n/a	n/a	IOSCAL	5694	225	222
GIFA-101400	GIFA-101400	1	6190	75	0	nd	nd	n/a	n/a	6190	75	110	33	IOSCAL	6544	226	234
GIFA-101401	GIFA-101401	1	9870	110	0	nd	nd	n/a	n/a	9870	110	110	33	IOSCAL	10851	327	347
GIFA-101402	GIFA-101402	1	4140	80	0	nd	nd	n/a	n/a	4140	80	110	33	IOSCAL	4163	260	280
Gif-11688	Gif-11688	1	5590	80	100	nd	nd	n/a	n/a	5590	128.062	n/a	n/a	IOSCAL	6390	281	378
GIFA-101403	GIFA-101403	1	8290	90	100	nd	nd	n/a	n/a	8290	134.536	110	33	IOSCAL	8777	378	383
Gif-11690	Gif-11690	1	11430	130	0	nd	nd	n/a	n/a	11430	130	n/a	n/a	IOSCAL	13309	264	210
GIFA-101404	GIFA-101404	1	10670	110	100	nd	nd	n/a	n/a	10670	148.661	110	33	IOSCAL	12010	470	513
Gif-11675	Gif-11675	1	9840	110	0	nd	nd	n/a	n/a	9840	110	n/a	n/a	IOSCAL	11284	451	476
GIFA-101405	GIFA-101405	1	12340	290	100	nd	nd	n/a	n/a	12340	306.757	110	33	IOSCAL	13917	939	758
GIFA-101406	GIFA-101406	1	4670	80	0	nd	nd	n/a	n/a	4670	80	110	33	IOSCAL	4848	293	292
GIFA-101407	GIFA-101407	1	12640	110	0	nd	nd	n/a	n/a	12640	110	110	33	IOSCAL	14304	494	399
GIFA-101408	GIFA-101408	1	6240	90	0	nd	nd	n/a	n/a	6240	90	110	33	IOSCAL	6599	264	259
GIFA-101409	GIFA-101409	1	11760	130	0	nd	nd	n/a	n/a	11760	130	110	33	IOSCAL	13194	302	317
GIFA-102053	GIFA-102053	1	9050	90	0	nd	nd	n/a	n/a	9050	90	110	33	IOSCAL	9723	344	259
KWG-123	KWG-123	1	7360	90	0	-1	assumed	390.682	48.198	7750.68	102.093	110	33	IOSCAL	8146	249	243
KWG-216	KWG-216	1	5510	170	100	-1	assumed	390.682	48.198	5900.68	203.035	110	33	IOSCAL	6235	470	478
KWG-171	KWG-171	1	5220	140	100	-1	assumed	390.682	48.198	5610.68	178.67	110	33	IOSCAL	5925	397	413
ZK-103	ZK-103	1	3920	95	0	-1	assumed	390.682	48.198	4310.68	106.527	110	33	IOSCAL	4387	374	325
KWG-222	KWG-222	1	1460	80	100	-23.25	assumed	28.8106	8.033	1488.81	128.314	n/a	n/a	IOSCAL	1393	304	266
KWG-175	KWG-175	1	1130	90	100	-23.25	assumed	28.8106	8.033	1158.81	134.776	n/a	n/a	IOSCAL	1075	227	284
KWG-176	KWG-176	1	640	70	100	-23.25	assumed	28.8106	8.033	668.811	122.33	n/a	n/a	IOSCAL	632	270	154
KWG-232	KWG-232	1	6120	160	100	-27.1	assumed	-34.641	27.3122	6085.36	190.646	n/a	n/a	IOSCAL	6950	468	453
KWG-170	KWG-170	1	2040	95	0	-1	assumed	390.682	48.198	2430.68	106.527	110	33	IOSCAL	2035	293	305
KWG-227	KWG-227	1	790	60	100	-23.25	assumed	28.8106	8.033	818.811	116.895	n/a	n/a	IOSCAL	756	199	201
KWG-167	KWG-167	1	3570	110	100	-23.25	assumed	28.8106	8.033	3598.81	148.878	n/a	n/a	IOSCAL	3913	468	420
KWG-172	KWG-172	1	960	60	100	-23.25	assumed	28.8106	8.033	988.811	116.895	n/a	n/a	IOSCAL	892	283	210
KWG-173	KWG-173	1	6030	150	100	-23.25	assumed	28.8106	8.033	6058.81	180.456	110	33	IOSCAL	6411	431	430
DGST1	DGST1	1	1510	90	0	-29	assumed	-66.0474	28.9188	1443.95	94.532	n/a	n/a	IOSCAL	1347	185	170
KWG-100	KWG-100	1	2670	150	100	-23.25	assumed	28.8106	8.033	2698.81	180.456	n/a	n/a	IOSCAL	2818	500	468
KWG-700	KWG-700	1	3840	95	100	-23.1	assumed	31.2776	9.6396	3871.28	138.268	n/a	n/a	IOSCAL	4285	514	390
KWG-796	KWG-796	1	2320	90	100	-23.1	assumed	31.2776	9.6396	2351.28	134.881	n/a	n/a	IOSCAL	2410	332	353
KWG693	KWG693	1	1310	65	0	-1	assumed	390.682	48.198	1700.68	80.92	110	33	IOSCAL	1202	200	233
KWG-690	KWG-690	1	2430	90	0	-1	assumed	390.682	48.198	2820.68	102.093	110	33	IOSCAL	2523	267	305
KWG-890	KWG-890	1	7390	140	100	-23.25	assumed	31.2776	9.6396	7421.28	172.316	n/a	n/a	IOSCAL	8225	359	350
KWG-62	KWG-62	1	1610	80	100	-23.25	assumed	28.8106	8.033	1638.81	128.314	n/a	n/a	IOSCAL	1530	289	230
KWG-13	KWG-13	1	1520	90	100	-23.25	assumed	28.8106	8.033	1548.81	134.776	n/a	n/a	IOSCAL	1452	272	275
GZ2088	GZ2088	1	1175	33	100	nd	nd	n/a	n/a	1175	105.304	n/a	n/a	IOSCAL	1094	205	258
GZ2089	GZ2089	1	1817	29	100	nd	nd	n/a	n/a	1817	104.12	n/a	n/a	IOSCAL	1721	270	299
GZ2090	GZ2090	1	2452	40	100	nd	nd	n/a	n/a	2452	107.703	n/a	n/a	IOSCAL	2531	227	347
GZ2091	GZ2091	1	3698	28	100	nd	nd	n/a	n/a	3698	103.846	n/a	n/a	IOSCAL	4045	358	318
KWG-179	KWG-179	1	1260	90	0	-1	assumed	390.682	48.198	1650.68	102.093	110	33	IOSCAL	1152	238	249
ZSSX1	ZSSX1	1	1260	90	0	-1	assumed	390.682	48.198	1650.68	102.093	110	33	IOSCAL	1152	238	249
GC-480	GC-480	1	5030	250	0	-1	assumed	390.682	48.198	5420.68	254.604	110	33	IOSCAL	5720	573	605
KWG-40	KWG-40	1	5790	170	0	-1	assumed	390.682	48.198	6180.68	176.7	110	33	IOSCAL	6542	437	406
KWG-46	KWG-46	1	5020	175	100	-23.25	assumed	28.8106	8.033	5048.81	201.716	n/a	n/a	IOSCAL	5802	473	475
KWG-99	KWG-99	1	4710	120	100	-23.25	assumed	28.8106	8.033	4738.81	156.411	n/a	n/a	IOSCAL	5445	441	468
KWG-48	KWG-48	1	1390	70	100	-23.25	assumed	28.8106	8.033	1418.81	122.33	n/a	n/a	IOSCAL	1324	243	264
KWG-43	KWG-43	1	1680	90	0	-1	assumed	390.682	48.198	2070.68	102.093	110	33	IOSCAL	1599	278	271
DMDLS1	DMDLS1	1	8050	200	100	-1	assumed	390.682	48.198	8440.68	228.742	110	33	IOSCAL	8966	541	576
KWG-86	KWG-86	1	5020	150	0	-1	assumed	390.682	48.198	5410.68	157.553	110	33	IOSCAL	5711	380	382
KWG-155	KWG-155	1	5440	120	0	-1	assumed	390.682	48.198	5830.68	129.318	110	33	IOSCAL	6158	325	311
GC-477	GC-477	1	5920	300	0	-1	assumed	390.682	48.198	6310.68	303.847	110	33	IOSCAL	6686	648	678
KWG-98	KWG-98	1	6550	150	0	-1	assumed	390.682	48.198	6940.68	157.553	110	33	IOSCAL	7352	323	363
RH-?	RH-?	1	7890	190	0	-27.1	assumed	-34.641	27.3122	7855.36	191.953	n/a	n/a	IOSCAL	8719	551	495
GC-483	GC-483	1	4940	250	0	-1	assumed	390.682	48.198	5330.68	254.604	110	33	IOSCAL	5620	582	623
Beta628986	Beta628986	1	3450	30	0	nd	nd	n/a	n/a	3450	30	110	33	IOSCAL	3286	161	173
Beta628987	Beta628987	1	5090	30	0	nd	nd	n/a	n/a	5090	30	110	33	IOSCAL	5373	180	158
Beta628988	Beta628988	1	7940	30	0	nd	nd	n/a	n/a	7940	30	110	33	IOSCAL	8345	153	160
Beta628989	Beta628989	1	7820	30	0	nd	nd	n/a	n/a	7820	30	110	33	IOSCAL	8224	140	173
PRD05001	PRD05001	1	1915	200	0	nd	nd	n/a	n/a	1915	200	n/a	n/a	IOSCAL	500	30	30
PRD05002	PRD05002	1	2065	180	0	nd	nd	n/a	n/a	2065	180	n/a	n/a	IOSCAL	1390	90	90
PRD05003	PRD05003	1	2355	150	0	nd	nd	n/a	n/a	2355	150	n/a	n/a	IOSCAL	3150	160	160
PRD05004	PRD05004	1	2955	160	0	nd	nd	n/a	n/a	2955	160	n/a	n/a	IOSCAL	2330	130	130
PRD05005	PRD05005	1	3681	94	0	nd	nd	n/a	n/a	3681	94	n/a	n/a	IOSCAL	3760	200	200
PRD05006	PRD05006	1	5185	115	0	nd	nd	n/a	n/a	5185	115	n/a	n/a	IOSCAL	3820	190	190
PRD05007	PRD05007	1	5530	180	0	nd	nd	n/a	n/a	5530	180	n/a	n/a	IOSCAL	4510	240	240
PRD05008	PRD05008	1	6380	135	0	nd	nd	n/a	n/a	6380	135	n/a	n/a	IOSCAL	5200	300	300
PRD05009	PRD05009	1	6450	180	0	nd	nd	n/a	n/a	6450	180	n/a	n/a	IOSCAL	4480	230	230
PRD05010	PRD05010	1	7000	155	0	nd	nd	n/a	n/a	7000	155	n/a	n/a	IOSCAL	7700	400	400
PRD05011	PRD05011	1	7570	180	0	nd	nd	n/a	n/a	7570	180	n/a	n/a	IOSCAL	7400	400	400
PRD05012	PRD05012	1	8640	240	0	nd	nd	n/a	n/a	8640	240	n/a	n/a	IOSCAL	7700	400	400
PRD05013	PRD05013	1	6640	270	0	nd	nd	n/a	n/a	6640	270	n/a	n/a	IOSCAL	6200	300	300
PRD05014	PRD05014	1	7925	195	0	nd	nd	n/a	n/a	7925	195	n/a	n/a	IOSCAL	8000	400	400
PRD05015	PRD05015	1	13380	220	0	nd	nd	n/a	n/a	13380	220	n/a	n/a	IOSCAL	7900	400	400
Zhan9603-1	Zhan9603-1	1	2100	90	0	-1	assumed	390.682	48.198	2490.68	102.093	110	33	IOSCAL	2110	291	309
KWG-42	KWG-42	1	6350	180	100	-23.25	assumed	28.8106	8.033	6378.81	206.069	n/a	n/a	IOSCAL	7260	395	469
Beta291321	Beta291321	1	2250	40	0	nd	nd	n/a	n/a	2250	40	n/a	n/a	IOSCAL	2230	114	81
Beta291322	Beta291322	1	2160	40	0	nd	nd	n/a	n/a	2160	40	n/a	n/a	IOSCAL	2150	158	147
Beta291323	Beta291323	1	2560	30	0	nd	nd	n/a	n/a	2560	30	n/a	n/a	IOSCAL	2715	38	200
GC-482	GC-482	1	2700	150	0	-1	assumed	390.682	48.198	3090.68	157.553	110	33	IOSCAL	2854	415	439
KWG-52	KWG-52	1	11620	380	100	-1	assumed	390.682	48.198	12010.7	395.883	110	33	IOSCAL	13527	1142	863
KWG-901	KWG-901	1	8380	140	0	-1	assumed	390.682	48.198	8770.68	148.064	110	33	IOSCAL	9376	422	397
KWG-87	KWG-87	1	4790	140	0	-1	assumed	390.682	48.198	5180.68	148.064	110	33	IOSCAL	5457	379	396
KWG-31	KWG-31	1	2350	110	100	-23.25	assumed	28.8106	48.198	2378.81	156.279	n/a	n/a	IOSCAL	2441	320	437
KWG-85	KWG-85	1	2510	90	0	-1	assumed	390.682	48.198	2900.68	102.093	110	33	IOSCAL	2611	277	292
KWG-88	KWG-88	1	3670	110	0	-24	assumed	31.2776	9.6396	3701.28	110.422	n/a	n/a	IOSCAL	4050	356	324
TSDH	TSDH	1	8500	180	0	-26	assumed	-16.4864	60.2475	8483.51	189.815	n/a	n/a	IOSCAL	9469	651	462
KWG-104	KWG-104	1	2320	85	0	-1	assumed	390.682	48.198	2710.68	97.7141	110	33	IOSCAL	2395	300	287
KWG-109	KWG-109	1	2120	90	0	-1	assumed	390.682	48.198	2510.68	102.093	110	33	IOSCAL	2134	296	311
GZ3927	GZ3927	1	2455	28	100	nd	nd	n/a	n/a	2455	103.846	n/a	n/a	IOSCAL	2534	223	221
GZ3928	GZ3928	1	2528	29	100	nd	nd	n/a	n/a	2528	104.12	n/a	n/a	IOSCAL	2583	258	236
GZ3929	GZ3929	1	6429	45	100	nd	nd	n/a	n/a	6429	109.659	n/a	n/a	IOSCAL	7339	229	305
ZK-526a	ZK-526a	1	4875	100	0	-1	assumed	390.682	48.198	5265.68	111.009	110	33	IOSCAL	5552	304	267
ZK-526b	ZK-526b	1	4765	130	0	-1	assumed	390.682	48.198	5155.68	138.647	110	33	IOSCAL	5430	345	393
ZK-527	ZK-527	1	4770	100	0	-1	assumed	390.682	48.198	5160.68	111.009	110	33	IOSCAL	5439	293	318
ZK-528	ZK-528	1	4810	100	0	-1	assumed	390.682	48.198	5200.68	111.009	110	33	IOSCAL	5482	307	298
ZK-547	ZK-547	1	3500	100	0	-1	assumed	390.682	48.198	3890.68	111.009	n/a	n/a	IOSCAL	4310	478	332
ZK-548	ZK-548	1	3730	100	0	-1	assumed	390.682	48.198	4120.68	111.009	n/a	n/a	IOSCAL	4640	231	344
KWG-29	KWG-29	1	4640	280	0	-1	assumed	390.682	48.198	5030.68	284.118	110	33	IOSCAL	5266	657	714
KWG-57	KWG-57	1	6510	170	100	-23.25	assumed	28.8106	8.033	6538.81	197.394	n/a	n/a	IOSCAL	7421	366	432
NHLJ1	NHLJ1	1	6985	105	100	-1	assumed	390.682	48.198	7375.68	152.801	110	33	IOSCAL	7767	339	323
ZK-543	ZK-543	1	4905	100	0	-1	assumed	390.682	48.198	5295.68	111.009	110	33	IOSCAL	5586	288	276
ZK-544	ZK-544	1	5310	100	0	-1	assumed	390.682	48.198	5700.68	111.009	110	33	IOSCAL	6026	266	298
Huang8304	Huang8304	1	5865	95	0	-1	assumed	390.682	48.198	6255.68	106.527	110	33	IOSCAL	6618	290	290
GZ4141	GZ4141	1	2090	20	0	nd	nd	n/a	n/a	2090	20	n/a	n/a	IOSCAL	2048	66	52
GZ4142	GZ4142	1	2210	25	0	nd	nd	n/a	n/a	2210	25	n/a	n/a	IOSCAL	2230	90	102
KWG-15	KWG-15	1	2270	110	0	-23.8	assumed	31.2776	9.6396	2301.28	110.422	n/a	n/a	IOSCAL	2323	382	316
Beta289664	Beta289664	1	7690	40	100	nd	nd	n/a	n/a	7690	107.703	n/a	n/a	IOSCAL	8489	282	282
Beta-201319	Beta-201319	1	4800	40	100	nd	nd	n/a	n/a	4800	107.703	n/a	n/a	IOSCAL	5517	336	214
Beta-289665	Beta-289665	1	7480	40	100	nd	nd	n/a	n/a	7480	107.703	n/a	n/a	IOSCAL	8276	175	249
Beta-290247	Beta-290247	1	6580	40	0	nd	nd	n/a	n/a	6580	40	n/a	n/a	IOSCAL	7479	87	53
Beta-291320	Beta-291320	1	6460	50	0	nd	nd	n/a	n/a	6460	50	n/a	n/a	IOSCAL	7367	97	100
GZ3942	GZ3942	1	7677	36	0	-27.5	measured	n/a	n/a	7677	36	n/a	n/a	IOSCAL	8460	82	62
GZ3943	GZ3943	1	7961	35	0	-27.5	measured	n/a	n/a	7961	35	n/a	n/a	IOSCAL	8836	153	189
GZ3944	GZ3944	1	8037	36	0	-27.5	measured	n/a	n/a	8037	36	n/a	n/a	IOSCAL	8900	122	172
KWG-8	KWG-8	1	6300	330	0	-27.1	assumed	-34.641	27.3122	6265.36	331.128	n/a	n/a	IOSCAL	7111	629	714
Beta-456813	Beta-456813	1	8280	30	0	nd	nd	n/a	n/a	8280	30	n/a	n/a	IOSCAL	9285	132	151
Beta-456815	Beta-456815	1	8180	40	100	nd	nd	n/a	n/a	8180	107.703	n/a	n/a	IOSCAL	9147	308	370
Beta-456816	Beta-456816	1	10200	30	0	nd	nd	n/a	n/a	10200	30	n/a	n/a	IOSCAL	11871	75	120
Beta-456811	Beta-456811	1	8450	30	0	nd	nd	n/a	n/a	8450	30	n/a	n/a	IOSCAL	9483	47	49
Beta-459975	Beta-459975	1	13030	60	100	nd	nd	n/a	n/a	13030	116.619	n/a	n/a	IOSCAL	15601	347	343
Beta-456814	Beta-456814	1	8390	50	0	nd	nd	n/a	n/a	8390	50	n/a	n/a	IOSCAL	9420	106	134
Beta-470506	Beta-470506	1	940	30	0	nd	nd	n/a	n/a	940	30	n/a	n/a	IOSCAL	849	72	66
Beta-470507	Beta-470507	1	1250	30	0	nd	nd	n/a	n/a	1250	30	n/a	n/a	IOSCAL	1208	68	135
Beta-470508	Beta-470508	1	3660	30	0	nd	nd	n/a	n/a	3660	30	n/a	n/a	IOSCAL	3985	101	87
Beta-470509	Beta-470509	1	4120	30	0	nd	nd	n/a	n/a	4120	30	n/a	n/a	IOSCAL	4651	165	124
Beta-476470	Beta-476470	1	6080	30	0	nd	nd	n/a	n/a	6080	30	n/a	n/a	IOSCAL	6937	214	136
Beta-476471	Beta-476471	1	7800	30	0	nd	nd	n/a	n/a	7800	30	n/a	n/a	IOSCAL	8572	66	107
Beta-491057	Beta-491057	1	6780	30	100	nd	nd	n/a	n/a	6780	104.403	n/a	n/a	IOSCAL	7634	201	202
Beta-470510	Beta-470510	1	250	30	0	nd	nd	n/a	n/a	250	30	n/a	n/a	IOSCAL	296	131	295
Beta-470511	Beta-470511	1	940	30	0	nd	nd	n/a	n/a	940	30	n/a	n/a	IOSCAL	849	72	66
Beta-458420	Beta-458420	1	1620	30	0	nd	nd	n/a	n/a	1620	30	n/a	n/a	IOSCAL	1480	63	71
Beta-458421	Beta-458421	1	1770	30	0	nd	nd	n/a	n/a	1770	30	n/a	n/a	IOSCAL	1652	72	77
Beta-458422	Beta-458422	1	2140	30	0	nd	nd	n/a	n/a	2140	30	n/a	n/a	IOSCAL	2115	184	114
Beta-470512	Beta-470512	1	2270	30	0	nd	nd	n/a	n/a	2270	30	n/a	n/a	IOSCAL	2241	104	84
Beta-470513	Beta-470513	1	7190	30	0	nd	nd	n/a	n/a	7190	30	n/a	n/a	IOSCAL	7993	38	53
Beta-470514	Beta-470514	1	7670	30	0	nd	nd	n/a	n/a	7670	30	n/a	n/a	IOSCAL	8449	89	47
Beta-458423	Beta-458423	1	7930	30	0	nd	nd	n/a	n/a	7930	30	n/a	n/a	IOSCAL	8760	222	154
Beta-494998	Beta-494998	1	5870	40	0	nd	nd	n/a	n/a	5870	40	n/a	n/a	IOSCAL	6694	94	130
Beta-494999	Beta-494999	1	7420	30	0	nd	nd	n/a	n/a	7420	30	n/a	n/a	IOSCAL	8262	70	82
GZ773	GZ773	1	2634	32	0	nd	nd	n/a	n/a	2634	32	n/a	n/a	IOSCAL	2753	88	29
GZ774	GZ774	1	3305	29	0	nd	nd	n/a	n/a	3305	29	n/a	n/a	IOSCAL	3520	56	67
GZ775	GZ775	1	3375	45	0	nd	nd	n/a	n/a	3375	45	n/a	n/a	IOSCAL	3608	205	126
GZ777	GZ777	1	3456	28	0	nd	nd	n/a	n/a	3456	28	n/a	n/a	IOSCAL	3721	108	83
GZ779	GZ779	1	3537	30	0	nd	nd	n/a	n/a	3537	30	n/a	n/a	IOSCAL	3820	82	121
GZ781	GZ781	1	3642	30	0	nd	nd	n/a	n/a	3642	30	n/a	n/a	IOSCAL	3956	127	106
GZ783	GZ783	1	3665	30	0	nd	nd	n/a	n/a	3665	30	n/a	n/a	IOSCAL	3994	93	94
GZ785	GZ785	1	3813	31	0	nd	nd	n/a	n/a	3813	31	n/a	n/a	IOSCAL	4200	153	110
GZ787	GZ787	1	4544	33	0	nd	nd	n/a	n/a	4544	33	n/a	n/a	IOSCAL	5161	156	110
1300	20	20
4800	27	27
10122	32	32
12031	nd	nd

## Sheet: Reference
Bard, S. M. (1976). Chung Hom Wan. Journal of the Hong Kong Archaeological Society, 6, 9–25.
Davis, A. M. (1999). Quaternary stratigraphy of Hong Kong coastal sediments. Journal of Asian Earth Sciences, 17(4), 521-531.
Davis, A., Aitchison, J., Flood, P., Morton, B., Baker, R., & Haworth, R. (2000). Late Holocene higher sea-level indicators from the South China coast. Marine Geology, 171(1-4), 1-5.
Ding, P., Shen, C.D., Yi, W.X., Liu, K.X., Ding, X.F., Fu, D.P., 2007. 14C chronological research of ancient forest system in Sihui, Guangdong Province. Quaternary Science 27, 492e498 (in Chinese).
Fu, S., Xiong, H., Zong, Y., & Huang, G. (2020). Reasons for the low sedimentation and slow progradation in the Pearl River delta, southern China, during the middle Holocene. Marine Geology, 423, 106133. https://doi.org/https://doi.org/10.1016/j.margeo.2020.106133.
Fyfe, J. A., Selby, I. C., Plater, A. J., & Wright, M. R. (1999). Erosion and sedimentation associated with the last sea level rise offshore Hong Kong, South China Sea. Quaternary international, 55(1), 93-100.
Howat, M. (1985). A nearshore colluvial deposit in Western District, Hong Kong island. Geological Society of Hong Kong Newsletter, 3(6), 6-12.
Huang Y., Xia F., Huang D. (1981). Holocene sea level changes and crustal movements along coastal zones of the northern South China Sea. Acta Oceanol Sin, 4(6): 713–723 (in Chinese).
Huang, Z., Li, P., Zhang, Z., Li, K., Qiao, P., (1982). Zhujiang (Pearl) Delta. General Scientific Press, Guangzhou (in Chinese).
Huang, Z., Li, P., Zhang, Z., Li, K., Qiao, P., Zong, Y. (1983). The Landforms of Shenzhen. Guangdong Scientific and Technological Press (In Chinese).
Huang, Z., Li, P., Zhang, Z., & Zong, Y. (1986). Changes of sea level in south China coast since the Late Pleistocene. China Sea-level Changes, 178-194 (In Chinese).
Huang, Z. (1992). Comparison of beach rock between China and Japan. Tropical Geography, 12(2): 108-121 (in Chinese).
Kendall, F.H., 1976. High Island - a study of undersea deposits. Journal of the Hong Kong Archaeological Society 6, 26-32.
Lai, K.W., Campbell, S.D.G. & Shaw, R. (1996). Geology of the northeastern New Territories. Hong Kong Geological Survey Memoir No. 5, Geotechnical Engineering Office, Hong Kong, 143 p.
Langford, R.L., Lai, K.W., Arthurton, R.S. & Shaw, R. (1989). Geology of the Western New Territories. Hong Kong Geological Survey Memoir No. 3, Geotechnical Control Office, Hong Kong Government, 140 p.
Li, P., Qiao, P., 1982. The evolution model of the Pearl River Delta over the last 6000 years. Journal of Sediment Research 1, 33–42 (in Chinese).
Li, P. (1988). Holocene beachrock in South China and its paleogeographic significance. Marine Geology and Quaternary Geology, 8(4), 21-29 (in Chinese).
Li, P., Qiao, P., Zheng, H., Fang, G., Huang, G., (1991). Environmental evolution of Zhujiang Delta in the Past 10000 years. China Ocean Press, Beijing, 154pp. (in Chinese).
Lin, P., Song, Y., Zhan, W., Tian, R., Wang, Z., Xu, X., Luo, L., Abbas, M. & Lai, Z. (2023). Late Pleistocene to Holocene sedimentary history in the Pearl River Delta revealed by OSL and radiocarbon dating. Catena, 224, 106972.
Liu, C., Fürsich, F. T., Wu, J., Dong, Y., Yang, T., Yin, J. (2013). Late Quaternary palaeoenvironmental changes documented by microfaunas and shell stable isotopes in the southern Pearl River Delta plain, South China. Journal of Palaeogeography, 2(4), 344-361.
Meacham, W. (1976). Lai Chi Lok. Journal of the Hong Kong Archaeological Society, 6, 33-36.
Meacham, W. (1978). Sham Wan, Lamma Island: an archaeological site study. Hong Kong Archaeological Society.
Meacham, W. (1979). C-14, T-L dates from geological and prehistoric sites in Hong Kong. Journal of the Hong Kong Archaeological Society, 7, 91-92.
Meacham, W. (1980). New C-14 dates from Hong Kong. Journal of the Hong Kong Archaeological Society 8, 126-128.
Meacham, W., (1982). Recent C-14/TL dates from geological and prehistoric site in Hong Kong. Journal of the Hong Kong Archaeological Society, 7, 77-79.
Owen, R., Neller, R., Shaw, R., & Cheung, P. (1995). Sedimentology, geochemistry and micropalaeontology of borehole A5/2, West Lamma Channel. Hong Kong Geologist, 1, 13-25.
Owen, R. B., Neller, R. J., Shaw, R., & Cheung, P. C. T. (1998). Late Quaternary environmental changes in Hong Kong. Palaeogeography, Palaeoclimatology, Palaeoecology, 138(1-4), 151-173. https://doi.org/10.1016/s0031-0182(97)00129-6
Strange, P.J., Shaw, R., 1986. Geology of Hong Kong Island and Kowloon. Hong Kong Geological Survey Memoir No. 2. Geotechnical Control Office, Hong Kong Government, Hong Kong, 134pp.
Sun, Y., Xiong, H., Lee, M. T., Brodie, C., & Zong, Y. (2021). Geochemical dynamics and depositional history from mangrove sediments within the Pearl River estuary. Palaeogeography, Palaeoclimatology, Palaeoecology, 584, 110701.
Wang, W. (1998). Beach rocks and storm deposits on the beaches of Hong Kong. Science in China Series D: Earth Sciences, 41(4), 369-376.
Wu, Z. (1985). Late Holocene se-level change at the Northern South China coast. Tropical Geomorphology. 6(2): 8-18. (in Chinese).
Xiong, H., Zong, Y., Qian, P., Huang, G., & Fu, S. (2018). Holocene sea-level history of the northern coast of South China Sea. Quaternary Science Reviews, 194, 12-26.
Xu, J. L. (1985). Shoal Growth and Evolution of Lingdingyang of the Pearl River Mouth (In Chinese).
Yang, S., Zheng, Z., Huang, K., Zong, Y., Wang, J., Xu, Q., Rolett, B.V. & Li, J. (2012). Modern pollen assemblages from cultivated rice fields and rice pollen morphology: Application to a study of ancient land use and agriculture in the Pearl River Delta, China. The Holocene, 22(12), 1393-1404.
Yim, W. S. (1984). Evidence for Quaternary environmental changes from sea-floor sediments in Hong Kong.
Yim, W. W. S. (1986). Radiocarbon dates from Hong Kong and their geological implication. J. Hong Kong Archaeol. Soc, 11, 50-63.
Yim, W. W. S. (1999). Radiocarbon dating and the reconstruction of late Quaternary sea-level changes in Hong Kong. Quaternary International, 55(1), 77-91.
Yim, W. S., Huang, G., Fontugne, M. R., Hale, R. E., Paterne, M., Pirazzoli, P. A., & Thomas, W. R. (2006). Postglacial sea-level changes in the northern South China Sea continental shelf: evidence for a post-8200 calendar yr BP meltwater pulse. Quaternary International, 145, 55-67.
Yu, K., & Chen, T., C. (2009). Beach sediments from northern South China Sea suggest high and oscillating sea levels during the late Holocene. Earth Science Frontiers, 16(6), 138-145.
Zhan, W., Liu, Y., Zhong, J. (1996). Discussion on historical sea level changes based on beachrocks along coast of Guangdong. South China Sea Research and Exploration, 4, 30–35 (In Chinese).
Zhang, J., Li, G., & Zhao, X. (1981). The age of formation of the marine shells and beach rocks in the Yinggehai region, Hainan Island. Seismology and Geology, 3(1), 66.
Zhang, H., Huang K., Chen, G., Li, Z., Chen, W., Zhang, J., & Zhao, X. (1982). On the Remnant of Ancient Marine Erosion in the Sheji Area, Nanhai County, Guangdong. Marine Sciences, 1, 12–16 (In Chinese).
Zong, Y. & Li, P. (1984). Analysis of condition to form the Holocene beachrock along the coast of eastern Guangdong. Tropical Geography, 4(4), 205-212 (In Chinese).
Zong, Y. (2004). Mid-Holocene sea-level highstand along the Southeast Coast of China. Quaternary International, 117(1), 55-67.
Zong, Y., Zheng, Z., Huang, K., Sun, Y., Wang, N., Tang, M., & Huang, G. (2013). Changes in sea level, water salinity and wetland habitat linked to the late agricultural development in the Pearl River delta plain of China. Quaternary science reviews, 70, 145-157.
