# Supplementary material for: Ancient oysters provide far-field sea-level constraints on ice melt timing and sources during the early–mid Holocene climate transition
Source: Research Square preprint supplement (doi:10.21203/rs.3.rs-8143807/v1), 2025-11-19
Supplement: Supplementary file 2 [file 5cfd4d7503fbe64317439efc.xlsx]

## Sheet: Elevation – unponded BWB oyster
ID	Latitude	Longitude	Altitude (mPD)
2409BWB-N1	22.2452	114.247	0.767
2409WBW-N2	22.2452	114.247	1.597
2409WBW-N3	22.2452	114.247	0.875
2409WBW-N4	22.2452	114.247	1.705
2409WBW-N5	22.2452	114.247	0.824
2409WBW-N6	22.2452	114.247	1.756
2409WBW-N7	22.2452	114.247	0.918
2409WBW-N8	22.2452	114.247	1.685
2409WBW-N9	22.2452	114.247	0.964
2409WBW-N10	22.2452	114.247	1.637
2409WBW-N11	22.2452	114.247	1.025
2409WBW-N12	22.2452	114.247	1.433
2409WBW-N13	22.2452	114.247	1.04
2409WBW-N14	22.2452	114.247	1.796
2409WBW-N15	22.2452	114.247	1.132
2409WBW-N16	22.2452	114.247	1.706
2409WBW-N17	22.2452	114.247	1.24
2409WBW-N18	22.2452	114.247	1.655
2409WBW-N19	22.2452	114.247	1.304
2409WBW-N20	22.2452	114.247	1.778
2409WBW-N21	22.2452	114.247	1.255
2409WBW-N22	22.2452	114.247	1.705
2409WBW-N23	22.2452	114.247	1.161
2409WBW-N24	22.2452	114.247	1.778
2409WBW-N25	22.2452	114.247	1.179
2409WBW-N26	22.2452	114.247	1.826
2409WBW-N27	22.2452	114.247	1.159
2409WBW-N28	22.2452	114.247	1.804
2409WBW-N29	22.2453	114.247	1.076
2409WBW-N30	22.2453	114.247	1.846
2409WBW-N31	22.2453	114.247	1.053
2409WBW-N32	22.2453	114.247	1.853
2409WBW-N33	22.2453	114.247	0.789
2409WBW-N34	22.2453	114.247	1.668
2409WBW-N35	22.2453	114.247	0.752
2409WBW-N36	22.2453	114.247	1.725
2409WBW-N37	22.2453	114.247	1.133
2409WBW-N38	22.2453	114.247	1.732
2409WBW-N39	22.2453	114.247	1.112
2409WBW-N40	22.2453	114.247	1.507
2409WBW-N41	22.2454	114.247	0.856
2409WBW-N42	22.2454	114.247	1.064
2409WBW-N43	22.2454	114.247	0.946
2409WBW-N44	22.2454	114.247	1.281
2409WBW-N45	22.2456	114.247	1.628
2409WBW-N46	22.2455	114.247	1.669
2409WBW-N47	22.2455	114.247	1.513
2409WBW-N48	22.2455	114.247	1.821
2409WBW-N49	22.2455	114.247	1.295
2409WBW-N50	22.2455	114.247	1.709
2409WBW-N51	22.2455	114.247	1.135
2409WBW-N52	22.2455	114.247	1.624
2409WBW-N53	22.2455	114.247	1.06
2409WBW-N54	22.2455	114.247	1.694
2409WBW-N55	22.2455	114.247	1.028
2409WBW-N56	22.2455	114.247	1.661
2409WBW-N57	22.2455	114.247	1.086
2409WBW-N58	22.2455	114.247	1.707
2409WBW-N59	22.2455	114.247	0.971
2409WBW-N60	22.2455	114.247	1.685
2409WBW-N61	22.2455	114.247	0.888
2409WBW-N62	22.2455	114.247	1.621
2409WBW-N63	22.2455	114.247	0.881
2409WBW-N64	22.2455	114.247	1.42
2409WBW-N65	22.2455	114.247	0.86
2409WBW-N66	22.2455	114.247	1.645
2409WBW-N67	22.2455	114.247	0.792
2409WBW-N68	22.2455	114.247	1.792
2409WBW-N69	22.2455	114.247	0.868
2409WBW-N70	22.2455	114.247	1.908
2409WBW-N71	22.2455	114.247	0.991
2409WBW-N72	22.2455	114.247	1.847
2409WBW-N73	22.2457	114.247	1.122
2409WBW-N74	22.2457	114.247	1.485
2409WBW-N75	22.2457	114.247	1.073
2409WBW-N76	22.2457	114.247	1.262
2409WBW-N77	22.2457	114.247	1.032
2409WBW-N78	22.2457	114.247	1.352
2409WBW-N79	22.2457	114.247	0.852
2409WBW-N80	22.2457	114.247	1.206
2409WBW-N81	22.2458	114.247	0.831
2409WBW-N82	22.2458	114.247	1.411
2409WBW-N83	22.2458	114.247	0.925
2409WBW-N84	22.2458	114.247	1.348
2409WBW-N85	22.2458	114.247	0.951
2409WBW-N86	22.2458	114.247	1.363
2409WBW-N87	22.2458	114.247	1.09
2409WBW-N88	22.2458	114.247	1.665

## Sheet: Elevation – ponded BWB oyster
ID	Latitude	Longitude	Altitude (mPD)
2409BWBTP1-A1	22.245	114.247	2.25
2409BWBTP1-A2	22.245	114.247	2.086
2409BWBTP1-A3	22.245	114.247	1.833
2409BWBTP1-A4	22.2451	114.247	1.781
2409BWBTP1-A5	22.2451	114.247	2.071
2409BWBTP1-A6	22.2451	114.247	1.863
2409BWBTP1-A7	22.2451	114.247	1.861
2409BWBTP1-A8	22.2451	114.247	1.884
2409BWBTP1-A9	22.2451	114.247	2.22
2409BWBTP1-B1	22.2451	114.247	2.213
2409BWBTP1-B2	22.2451	114.247	2.004
2409BWBTP1-B3	22.2451	114.247	1.94
2409BWBTP1-B4	22.245	114.247	1.763
2409BWBTP1-B5	22.245	114.247	1.911
2409BWBTP1-B6	22.245	114.247	2.108
2409BWBTP1-B7	22.245	114.247	2.244
2409BWBTP2-A1	22.245	114.247	2.055
2409BWBTP2-A2	22.245	114.247	2.19
2409BWBTP3-A1	22.245	114.247	1.883
2409BWBTP3-A2	22.245	114.247	2.12
2409BWBTP3-A3	22.245	114.247	1.996
2409BWBTP3-A4	22.245	114.247	2.125
2409BWBTP3-A5	22.245	114.247	1.927
2409BWBTP3-A6	22.245	114.247	2.132
2409BWBTP4-A1	22.245	114.247	1.948
2409BWBTP4-A2	22.245	114.247	2.119
2409BWBTP4-A3	22.245	114.247	1.946
2409BWBTP4-A4	22.245	114.247	2.12
2409BWBTP4-A5	22.245	114.247	1.848
2409BWBTP4-A6	22.245	114.247	2.069
2409BWBTP4-A7	22.245	114.247	1.819
2409BWBTP4-A8	22.245	114.247	2.097
2409BWBTP5-A1	22.245	114.247	1.929
2409BWBTP5-A2	22.245	114.247	2.147
2409BWBTP5-A3	22.245	114.247	1.94
2409BWBTP5-A4	22.245	114.247	2.139
2409BWBTP5-A5	22.245	114.247	2.019
2409BWBTP5-A6	22.245	114.247	2.166
2409BWBTP5-A7	22.245	114.247	2.044
2409BWBTP5-A8	22.245	114.247	2.175
2409BWBTP6-A1	22.2449	114.247	1.926
2409BWBTP6-A2	22.2449	114.247	2.138
2409BWBTP6-A3	22.2449	114.247	1.802
2409BWBTP6-A4	22.2449	114.247	2.146
2409BWBTP6-A5	22.2449	114.247	1.836
2409BWBTP6-A6	22.2449	114.247	2.122
2409BWBTP6-A7	22.2449	114.247	1.881
2409BWBTP6-A8	22.2449	114.247	2.117
2409BWBTP6-A9	22.2449	114.247	1.834
2409BWBTP6-A10	22.2449	114.247	2.11
2409BWBTP7-A1	22.245	114.247	1.89
2409BWBTP7-A2	22.245	114.247	2.126
2409BWBTP7-A3	22.2449	114.247	2.022
2409BWBTP7-A4	22.2449	114.247	2.114
2409BWBTP7-A5	22.245	114.247	1.823
2409BWBTP7-A6	22.245	114.247	2.084
2409BWBTP8-A1	22.2449	114.247	1.91
2409BWBTP8-A2	22.2449	114.247	2.115
2409BWBTP8-A3	22.2449	114.247	1.916
2409BWBTP8-A4	22.2449	114.247	2.099
2409BWBTP8-A5	22.2449	114.247	1.933
2409BWBTP8-A6	22.2449	114.247	2.137
2409BWBTP9-A1	22.2449	114.247	2.235
2409BWBTP9-A2	22.2449	114.247	2.425
2409BWBTP9-A3	22.2449	114.247	2.31
2409BWBTP9-A4	22.2449	114.247	2.451
2409BWBTP9-A5	22.2449	114.247	2.2
2409BWBTP9-A6	22.2449	114.247	2.435
2409BWBTP9-A7	22.2449	114.247	2.175
2409BWBTP9-A8	22.2449	114.247	2.43

## Sheet: Survey of contemporary oyster
Year	Season	Site	Altitude (mPD)	Quadrat	Saccostrea cuccullata (%)			Sites	abbreviation	Lat	Long
2020	W	KSC	2.4535	HH1	0			Tai Tam	TT	22.2375	114.229
2020	W	KSC	2.4535	HH2	0			Middle Bay	MB	22.2293	114.197
2020	W	KSC	2.4535	HH3	0			Wah Fu	WF	22.2528	114.132
2020	W	KSC	2.4535	HH4	0			Shek O	SO	22.2287	114.256
2020	W	KSC	2.4535	HH5	0			Lung Kwu Tan	LKT	22.3924	113.916
2020	W	KSC	2.4535	HH6	0			Siu Lam	SL	22.3626	114.01
2020	W	KSC	2.4535	HH7	0			Luk Keng	LK	22.3344	114.023
2020	W	KSC	2.4535	HH8	0			Tai O	TO	22.2572	113.853
2020	W	KSC	2.4535	HH9	0			Tai Long Wan	TLW	22.2172	113.882
2020	W	KSC	2.4535	HH10	0			Pui O	PO	22.2349	113.981
2020	W	KSC	2.1726	LH1	0			Shui Tseng	ST	22.2502	114.007
2020	W	KSC	2.1726	LH2	0			Peng Chau	PC	22.2832	114.047
2020	W	KSC	2.1726	LH3	0			UST/Pak Shui Wun	PSW	22.3399	114.266
2020	W	KSC	2.1726	LH4	0			Kau Sai Chau	KSC	22.3795	114.31
2020	W	KSC	2.1726	LH5	0			Pak Lap	PL	22.3509	114.359
2020	W	KSC	2.1726	LH6	0			Sai Wan	SW	22.3983	114.375
2020	W	KSC	2.1726	LH7	0			Starfish Bay	SB	22.4363	114.247
2020	W	KSC	2.1726	LH8	0			Tseng Tau	TST	22.4335	114.269
2020	W	KSC	2.1726	LH9	0			Lai Chi Chong	LCC	22.4566	114.299
2020	W	KSC	2.1726	LH10	0			Ma Shi Chau	MSC	22.457	114.235
2020	W	KSC	1.8917	HM1	0			Yung Shue Au	YSA	22.5494	114.247
2020	W	KSC	1.8917	HM2	0			Double Island	DI	22.5182	114.32
2020	W	KSC	1.8917	HM3	0			Hung Shek Mun	HSM	22.5013	114.301
2020	W	KSC	1.8917	HM4	0			Kat O	KO	22.551	114.297
2020	W	KSC	1.8917	HM5	0
2020	W	KSC	1.8917	HM6	0
2020	W	KSC	1.8917	HM7	0
2020	W	KSC	1.8917	HM8	0
2020	W	KSC	1.8917	HM9	0
2020	W	KSC	1.8917	HM10	0
2020	W	KSC	1.6108	LM1	6.25
2020	W	KSC	1.6108	LM2	4.16667
2020	W	KSC	1.6108	LM3	0
2020	W	KSC	1.6108	LM4	6.38298
2020	W	KSC	1.6108	LM5	0
2020	W	KSC	1.6108	LM6	0
2020	W	KSC	1.6108	LM7	0
2020	W	KSC	1.6108	LM8	0
2020	W	KSC	1.6108	LM9	4.16667
2020	W	KSC	1.6108	LM10	0
2020	W	KSC	1.3299	HL1	14.5833
2020	W	KSC	1.3299	HL2	42.2222
2020	W	KSC	1.3299	HL3	4.54545
2020	W	KSC	1.3299	HL4	45.6522
2020	W	KSC	1.3299	HL5	18.75
2020	W	KSC	1.3299	HL6	0
2020	W	KSC	1.3299	HL7	20.8333
2020	W	KSC	1.3299	HL8	10.4167
2020	W	KSC	1.3299	HL9	36.1702
2020	W	KSC	1.3299	HL10	35.5556
2020	W	KSC	1.049	LL1	NA
2020	W	KSC	1.049	LL2	NA
2020	W	KSC	1.049	LL3	NA
2020	W	KSC	1.049	LL4	NA
2020	W	KSC	1.049	LL5	NA
2020	W	KSC	1.049	LL6	NA
2020	W	KSC	1.049	LL7	NA
2020	W	KSC	1.049	LL8	NA
2020	W	KSC	1.049	LL9	NA
2020	W	KSC	1.049	LL10	NA
2020	W	PL	3.29	HH1	0
2020	W	PL	3.29	HH2	0
2020	W	PL	3.29	HH3	0
2020	W	PL	3.29	HH4	0
2020	W	PL	3.29	HH5	0
2020	W	PL	3.29	HH6	0
2020	W	PL	3.29	HH7	0
2020	W	PL	3.29	HH8	0
2020	W	PL	3.29	HH9	0
2020	W	PL	3.29	HH10	0
2020	W	PL	2.8265	LH1	0
2020	W	PL	2.8265	LH2	0
2020	W	PL	2.8265	LH3	0
2020	W	PL	2.8265	LH4	0
2020	W	PL	2.8265	LH5	0
2020	W	PL	2.8265	LH6	0
2020	W	PL	2.8265	LH7	0
2020	W	PL	2.8265	LH8	0
2020	W	PL	2.8265	LH9	0
2020	W	PL	2.8265	LH10	0
2020	W	PL	2.363	HM1	0
2020	W	PL	2.363	HM2	0
2020	W	PL	2.363	HM3	0
2020	W	PL	2.363	HM4	0
2020	W	PL	2.363	HM5	0
2020	W	PL	2.363	HM6	0
2020	W	PL	2.363	HM7	0
2020	W	PL	2.363	HM8	0
2020	W	PL	2.363	HM9	0
2020	W	PL	2.363	HM10	0
2020	W	PL	1.8995	LM1	0
2020	W	PL	1.8995	LM2	0
2020	W	PL	1.8995	LM3	0
2020	W	PL	1.8995	LM4	0
2020	W	PL	1.8995	LM5	0
2020	W	PL	1.8995	LM6	0
2020	W	PL	1.8995	LM7	0
2020	W	PL	1.8995	LM8	0
2020	W	PL	1.8995	LM9	0
2020	W	PL	1.8995	LM10	0
2020	W	PL	1.436	HL1	0
2020	W	PL	1.436	HL2	0
2020	W	PL	1.436	HL3	0
2020	W	PL	1.436	HL4	0
2020	W	PL	1.436	HL5	0
2020	W	PL	1.436	HL6	0
2020	W	PL	1.436	HL7	0
2020	W	PL	1.436	HL8	0
2020	W	PL	1.436	HL9	0
2020	W	PL	1.436	HL10	0
2020	W	PL	0.9725	LL1	NA
2020	W	PL	0.9725	LL2	NA
2020	W	PL	0.9725	LL3	NA
2020	W	PL	0.9725	LL4	NA
2020	W	PL	0.9725	LL5	NA
2020	W	PL	0.9725	LL6	NA
2020	W	PL	0.9725	LL7	NA
2020	W	PL	0.9725	LL8	NA
2020	W	PL	0.9725	LL9	NA
2020	W	PL	0.9725	LL10	NA
2020	W	PSW	2.6165	HH1	0
2020	W	PSW	2.6165	HH2	0
2020	W	PSW	2.6165	HH3	0
2020	W	PSW	2.6165	HH4	0
2020	W	PSW	2.6165	HH5	0
2020	W	PSW	2.6165	HH6	0
2020	W	PSW	2.6165	HH7	0
2020	W	PSW	2.6165	HH8	0
2020	W	PSW	2.6165	HH9	0
2020	W	PSW	2.6165	HH10	0
2020	W	PSW	2.2919	LH1	0
2020	W	PSW	2.2919	LH2	0
2020	W	PSW	2.2919	LH3	0
2020	W	PSW	2.2919	LH4	0
2020	W	PSW	2.2919	LH5	0
2020	W	PSW	2.2919	LH6	0
2020	W	PSW	2.2919	LH7	0
2020	W	PSW	2.2919	LH8	0
2020	W	PSW	2.2919	LH9	0
2020	W	PSW	2.2919	LH10	0
2020	W	PSW	1.9673	HM1	0
2020	W	PSW	1.9673	HM2	0
2020	W	PSW	1.9673	HM3	0
2020	W	PSW	1.9673	HM4	0
2020	W	PSW	1.9673	HM5	0
2020	W	PSW	1.9673	HM6	0
2020	W	PSW	1.9673	HM7	0
2020	W	PSW	1.9673	HM8	0
2020	W	PSW	1.9673	HM9	0
2020	W	PSW	1.9673	HM10	0
2020	W	PSW	1.6427	LM1	2.04082
2020	W	PSW	1.6427	LM2	0
2020	W	PSW	1.6427	LM3	0
2020	W	PSW	1.6427	LM4	2.04082
2020	W	PSW	1.6427	LM5	0
2020	W	PSW	1.6427	LM6	0
2020	W	PSW	1.6427	LM7	0
2020	W	PSW	1.6427	LM8	0
2020	W	PSW	1.6427	LM9	0
2020	W	PSW	1.6427	LM10	2.04082
2020	W	PSW	1.3181	HL1	0
2020	W	PSW	1.3181	HL2	13.6364
2020	W	PSW	1.3181	HL3	4.44444
2020	W	PSW	1.3181	HL4	20
2020	W	PSW	1.3181	HL5	30.6122
2020	W	PSW	1.3181	HL6	0
2020	W	PSW	1.3181	HL7	0
2020	W	PSW	1.3181	HL8	19.1489
2020	W	PSW	1.3181	HL9	40
2020	W	PSW	1.3181	HL10	26.087
2020	W	PSW	0.9935	LL1	NA
2020	W	PSW	0.9935	LL2	NA
2020	W	PSW	0.9935	LL3	NA
2020	W	PSW	0.9935	LL4	NA
2020	W	PSW	0.9935	LL5	NA
2020	W	PSW	0.9935	LL6	NA
2020	W	PSW	0.9935	LL7	NA
2020	W	PSW	0.9935	LL8	NA
2020	W	PSW	0.9935	LL9	NA
2020	W	PSW	0.9935	LL10	NA
2020	W	SW	3.966	HH1	0
2020	W	SW	3.966	HH2	0
2020	W	SW	3.966	HH3	0
2020	W	SW	3.966	HH4	0
2020	W	SW	3.966	HH5	0
2020	W	SW	3.966	HH6	0
2020	W	SW	3.966	HH7	0
2020	W	SW	3.966	HH8	0
2020	W	SW	3.966	HH9	0
2020	W	SW	3.966	HH10	0
2020	W	SW	3.3629	LH1	0
2020	W	SW	3.3629	LH2	0
2020	W	SW	3.3629	LH3	0
2020	W	SW	3.3629	LH4	0
2020	W	SW	3.3629	LH5	0
2020	W	SW	3.3629	LH6	0
2020	W	SW	3.3629	LH7	0
2020	W	SW	3.3629	LH8	0
2020	W	SW	3.3629	LH9	0
2020	W	SW	3.3629	LH10	0
2020	W	SW	2.7598	HM1	0
2020	W	SW	2.7598	HM2	0
2020	W	SW	2.7598	HM3	0
2020	W	SW	2.7598	HM4	0
2020	W	SW	2.7598	HM5	0
2020	W	SW	2.7598	HM6	0
2020	W	SW	2.7598	HM7	0
2020	W	SW	2.7598	HM8	0
2020	W	SW	2.7598	HM9	0
2020	W	SW	2.7598	HM10	0
2020	W	SW	2.1567	LM1	0
2020	W	SW	2.1567	LM2	0
2020	W	SW	2.1567	LM3	0
2020	W	SW	2.1567	LM4	0
2020	W	SW	2.1567	LM5	0
2020	W	SW	2.1567	LM6	0
2020	W	SW	2.1567	LM7	0
2020	W	SW	2.1567	LM8	0
2020	W	SW	2.1567	LM9	0
2020	W	SW	2.1567	LM10	0
2020	W	SW	1.5536	HL1	0
2020	W	SW	1.5536	HL2	0
2020	W	SW	1.5536	HL3	0
2020	W	SW	1.5536	HL4	0
2020	W	SW	1.5536	HL5	0
2020	W	SW	1.5536	HL6	0
2020	W	SW	1.5536	HL7	0
2020	W	SW	1.5536	HL8	0
2020	W	SW	1.5536	HL9	0
2020	W	SW	1.5536	HL10	0
2020	W	SW	0.9505	LL1	NA
2020	W	SW	0.9505	LL2	NA
2020	W	SW	0.9505	LL3	NA
2020	W	SW	0.9505	LL4	NA
2020	W	SW	0.9505	LL5	NA
2020	W	SW	0.9505	LL6	NA
2020	W	SW	0.9505	LL7	NA
2020	W	SW	0.9505	LL8	NA
2020	W	SW	0.9505	LL9	NA
2020	W	SW	0.9505	LL10	NA
2020	W	DI	2.902	HH1	0
2020	W	DI	2.902	HH2	0
2020	W	DI	2.902	HH3	0
2020	W	DI	2.902	HH4	0
2020	W	DI	2.902	HH5	0
2020	W	DI	2.902	HH6	0
2020	W	DI	2.902	HH7	0
2020	W	DI	2.902	HH8	0
2020	W	DI	2.902	HH9	0
2020	W	DI	2.902	HH10	0
2020	W	DI	2.5192	LH1	0
2020	W	DI	2.5192	LH2	0
2020	W	DI	2.5192	LH3	0
2020	W	DI	2.5192	LH4	0
2020	W	DI	2.5192	LH5	0
2020	W	DI	2.5192	LH6	0
2020	W	DI	2.5192	LH7	0
2020	W	DI	2.5192	LH8	0
2020	W	DI	2.5192	LH9	0
2020	W	DI	2.5192	LH10	0
2020	W	DI	2.1364	HM1	0
2020	W	DI	2.1364	HM2	0
2020	W	DI	2.1364	HM3	0
2020	W	DI	2.1364	HM4	0
2020	W	DI	2.1364	HM5	0
2020	W	DI	2.1364	HM6	0
2020	W	DI	2.1364	HM7	0
2020	W	DI	2.1364	HM8	0
2020	W	DI	2.1364	HM9	0
2020	W	DI	2.1364	HM10	0
2020	W	DI	1.7536	LM1	0
2020	W	DI	1.7536	LM2	0
2020	W	DI	1.7536	LM3	0
2020	W	DI	1.7536	LM4	4.25532
2020	W	DI	1.7536	LM5	2.12766
2020	W	DI	1.7536	LM6	6.38298
2020	W	DI	1.7536	LM7	12.766
2020	W	DI	1.7536	LM8	0
2020	W	DI	1.7536	LM9	8.33333
2020	W	DI	1.7536	LM10	0
2020	W	DI	1.3708	HL1	2.17391
2020	W	DI	1.3708	HL2	0
2020	W	DI	1.3708	HL3	0
2020	W	DI	1.3708	HL4	6.12245
2020	W	DI	1.3708	HL5	19.5652
2020	W	DI	1.3708	HL6	9.30233
2020	W	DI	1.3708	HL7	0
2020	W	DI	1.3708	HL8	2.17391
2020	W	DI	1.3708	HL9	4.16667
2020	W	DI	1.3708	HL10	6.81818
2020	W	DI	0.988	LL1	0
2020	W	DI	0.988	LL2	0
2020	W	DI	0.988	LL3	2.17391
2020	W	DI	0.988	LL4	0
2020	W	DI	0.988	LL5	0
2020	W	DI	0.988	LL6	0
2020	W	DI	0.988	LL7	6.38298
2020	W	DI	0.988	LL8	0
2020	W	DI	0.988	LL9	0
2020	W	DI	0.988	LL10	0
2020	W	HSM	2.576	HH1	0
2020	W	HSM	2.576	HH2	0
2020	W	HSM	2.576	HH3	0
2020	W	HSM	2.576	HH4	0
2020	W	HSM	2.576	HH5	0
2020	W	HSM	2.576	HH6	0
2020	W	HSM	2.576	HH7	0
2020	W	HSM	2.576	HH8	0
2020	W	HSM	2.576	HH9	0
2020	W	HSM	2.576	HH10	0
2020	W	HSM	2.2544	LH1	0
2020	W	HSM	2.2544	LH2	0
2020	W	HSM	2.2544	LH3	0
2020	W	HSM	2.2544	LH4	0
2020	W	HSM	2.2544	LH5	0
2020	W	HSM	2.2544	LH6	0
2020	W	HSM	2.2544	LH7	0
2020	W	HSM	2.2544	LH8	0
2020	W	HSM	2.2544	LH9	0
2020	W	HSM	2.2544	LH10	0
2020	W	HSM	1.9328	HM1	0
2020	W	HSM	1.9328	HM2	0
2020	W	HSM	1.9328	HM3	0
2020	W	HSM	1.9328	HM4	0
2020	W	HSM	1.9328	HM5	0
2020	W	HSM	1.9328	HM6	0
2020	W	HSM	1.9328	HM7	0
2020	W	HSM	1.9328	HM8	0
2020	W	HSM	1.9328	HM9	0
2020	W	HSM	1.9328	HM10	0
2020	W	HSM	1.6112	LM1	31.25
2020	W	HSM	1.6112	LM2	8.16327
2020	W	HSM	1.6112	LM3	30.6122
2020	W	HSM	1.6112	LM4	10.8696
2020	W	HSM	1.6112	LM5	17.7778
2020	W	HSM	1.6112	LM6	2.17391
2020	W	HSM	1.6112	LM7	0
2020	W	HSM	1.6112	LM8	0
2020	W	HSM	1.6112	LM9	24.4898
2020	W	HSM	1.6112	LM10	30.6122
2020	W	HSM	1.2896	HL1	NA
2020	W	HSM	1.2896	HL2	NA
2020	W	HSM	1.2896	HL3	NA
2020	W	HSM	1.2896	HL4	NA
2020	W	HSM	1.2896	HL5	NA
2020	W	HSM	1.2896	HL6	NA
2020	W	HSM	1.2896	HL7	NA
2020	W	HSM	1.2896	HL8	NA
2020	W	HSM	1.2896	HL9	NA
2020	W	HSM	1.2896	HL10	NA
2020	W	HSM	0.968	LL1	NA
2020	W	HSM	0.968	LL2	NA
2020	W	HSM	0.968	LL3	NA
2020	W	HSM	0.968	LL4	NA
2020	W	HSM	0.968	LL5	NA
2020	W	HSM	0.968	LL6	NA
2020	W	HSM	0.968	LL7	NA
2020	W	HSM	0.968	LL8	NA
2020	W	HSM	0.968	LL9	NA
2020	W	HSM	0.968	LL10	NA
2020	W	KO	3.243	HH1	0
2020	W	KO	3.243	HH2	0
2020	W	KO	3.243	HH3	0
2020	W	KO	3.243	HH4	0
2020	W	KO	3.243	HH5	0
2020	W	KO	3.243	HH6	0
2020	W	KO	3.243	HH7	0
2020	W	KO	3.243	HH8	0
2020	W	KO	3.243	HH9	0
2020	W	KO	3.243	HH10	0
2020	W	KO	2.8258	LH1	0
2020	W	KO	2.8258	LH2	0
2020	W	KO	2.8258	LH3	0
2020	W	KO	2.8258	LH4	0
2020	W	KO	2.8258	LH5	0
2020	W	KO	2.8258	LH6	0
2020	W	KO	2.8258	LH7	0
2020	W	KO	2.8258	LH8	0
2020	W	KO	2.8258	LH9	0
2020	W	KO	2.8258	LH10	0
2020	W	KO	2.4086	HM1	0
2020	W	KO	2.4086	HM2	0
2020	W	KO	2.4086	HM3	0
2020	W	KO	2.4086	HM4	0
2020	W	KO	2.4086	HM5	0
2020	W	KO	2.4086	HM6	0
2020	W	KO	2.4086	HM7	0
2020	W	KO	2.4086	HM8	0
2020	W	KO	2.4086	HM9	0
2020	W	KO	2.4086	HM10	0
2020	W	KO	1.9914	LM1	2.04082
2020	W	KO	1.9914	LM2	0
2020	W	KO	1.9914	LM3	0
2020	W	KO	1.9914	LM4	0
2020	W	KO	1.9914	LM5	0
2020	W	KO	1.9914	LM6	0
2020	W	KO	1.9914	LM7	0
2020	W	KO	1.9914	LM8	0
2020	W	KO	1.9914	LM9	0
2020	W	KO	1.9914	LM10	0
2020	W	KO	1.5742	HL1	0
2020	W	KO	1.5742	HL2	0
2020	W	KO	1.5742	HL3	0
2020	W	KO	1.5742	HL4	2.17391
2020	W	KO	1.5742	HL5	2.27273
2020	W	KO	1.5742	HL6	0
2020	W	KO	1.5742	HL7	0
2020	W	KO	1.5742	HL8	0
2020	W	KO	1.5742	HL9	0
2020	W	KO	1.5742	HL10	12.766
2020	W	KO	1.157	LL1	0
2020	W	KO	1.157	LL2	2.17391
2020	W	KO	1.157	LL3	0
2020	W	KO	1.157	LL4	0
2020	W	KO	1.157	LL5	0
2020	W	KO	1.157	LL6	0
2020	W	KO	1.157	LL7	0
2020	W	KO	1.157	LL8	0
2020	W	KO	1.157	LL9	0
2020	W	KO	1.157	LL10	0
2020	W	YSA	3.0405	HH1	0
2020	W	YSA	3.0405	HH2	0
2020	W	YSA	3.0405	HH3	0
2020	W	YSA	3.0405	HH4	0
2020	W	YSA	3.0405	HH5	0
2020	W	YSA	3.0405	HH6	0
2020	W	YSA	3.0405	HH7	0
2020	W	YSA	3.0405	HH8	0
2020	W	YSA	3.0405	HH9	0
2020	W	YSA	3.0405	HH10	0
2020	W	YSA	2.646	LH1	0
2020	W	YSA	2.646	LH2	0
2020	W	YSA	2.646	LH3	0
2020	W	YSA	2.646	LH4	0
2020	W	YSA	2.646	LH5	0
2020	W	YSA	2.646	LH6	0
2020	W	YSA	2.646	LH7	0
2020	W	YSA	2.646	LH8	0
2020	W	YSA	2.646	LH9	0
2020	W	YSA	2.646	LH10	0
2020	W	YSA	2.2515	HM1	0
2020	W	YSA	2.2515	HM2	0
2020	W	YSA	2.2515	HM3	0
2020	W	YSA	2.2515	HM4	0
2020	W	YSA	2.2515	HM5	0
2020	W	YSA	2.2515	HM6	0
2020	W	YSA	2.2515	HM7	0
2020	W	YSA	2.2515	HM8	0
2020	W	YSA	2.2515	HM9	0
2020	W	YSA	2.2515	HM10	0
2020	W	YSA	1.857	LM1	12.766
2020	W	YSA	1.857	LM2	18.75
2020	W	YSA	1.857	LM3	10.6383
2020	W	YSA	1.857	LM4	6.38298
2020	W	YSA	1.857	LM5	2.04082
2020	W	YSA	1.857	LM6	4.25532
2020	W	YSA	1.857	LM7	20.4082
2020	W	YSA	1.857	LM8	10.2041
2020	W	YSA	1.857	LM9	4.25532
2020	W	YSA	1.857	LM10	0
2020	W	YSA	1.4625	HL1	NA
2020	W	YSA	1.4625	HL2	NA
2020	W	YSA	1.4625	HL3	NA
2020	W	YSA	1.4625	HL4	NA
2020	W	YSA	1.4625	HL5	NA
2020	W	YSA	1.4625	HL6	NA
2020	W	YSA	1.4625	HL7	NA
2020	W	YSA	1.4625	HL8	NA
2020	W	YSA	1.4625	HL9	NA
2020	W	YSA	1.4625	HL10	NA
2020	W	YSA	1.068	LL1	NA
2020	W	YSA	1.068	LL2	NA
2020	W	YSA	1.068	LL3	NA
2020	W	YSA	1.068	LL4	NA
2020	W	YSA	1.068	LL5	NA
2020	W	YSA	1.068	LL6	NA
2020	W	YSA	1.068	LL7	NA
2020	W	YSA	1.068	LL8	NA
2020	W	YSA	1.068	LL9	NA
2020	W	YSA	1.068	LL10	NA
2020	W	LK	2.357	HH1	0
2020	W	LK	2.357	HH2	0
2020	W	LK	2.357	HH3	0
2020	W	LK	2.357	HH4	0
2020	W	LK	2.357	HH5	0
2020	W	LK	2.357	HH6	0
2020	W	LK	2.357	HH7	0
2020	W	LK	2.357	HH8	0
2020	W	LK	2.357	HH9	0
2020	W	LK	2.357	HH10	0
2020	W	LK	2.0776	LH1	0
2020	W	LK	2.0776	LH2	0
2020	W	LK	2.0776	LH3	0
2020	W	LK	2.0776	LH4	0
2020	W	LK	2.0776	LH5	0
2020	W	LK	2.0776	LH6	0
2020	W	LK	2.0776	LH7	0
2020	W	LK	2.0776	LH8	0
2020	W	LK	2.0776	LH9	0
2020	W	LK	2.0776	LH10	0
2020	W	LK	1.7982	HM1	0
2020	W	LK	1.7982	HM2	0
2020	W	LK	1.7982	HM3	2.04082
2020	W	LK	1.7982	HM4	0
2020	W	LK	1.7982	HM5	0
2020	W	LK	1.7982	HM6	0
2020	W	LK	1.7982	HM7	0
2020	W	LK	1.7982	HM8	0
2020	W	LK	1.7982	HM9	0
2020	W	LK	1.7982	HM10	0
2020	W	LK	1.5188	LM1	6.12245
2020	W	LK	1.5188	LM2	36.9565
2020	W	LK	1.5188	LM3	41.3043
2020	W	LK	1.5188	LM4	10.2041
2020	W	LK	1.5188	LM5	0
2020	W	LK	1.5188	LM6	35.4167
2020	W	LK	1.5188	LM7	31.25
2020	W	LK	1.5188	LM8	4.16667
2020	W	LK	1.5188	LM9	0
2020	W	LK	1.5188	LM10	4.34783
2020	W	LK	1.2394	HL1	26.5306
2020	W	LK	1.2394	HL2	16.3265
2020	W	LK	1.2394	HL3	0
2020	W	LK	1.2394	HL4	0
2020	W	LK	1.2394	HL5	6.38298
2020	W	LK	1.2394	HL6	6.25
2020	W	LK	1.2394	HL7	0
2020	W	LK	1.2394	HL8	4.54545
2020	W	LK	1.2394	HL9	4.08163
2020	W	LK	1.2394	HL10	0
2020	W	LK	0.96	LL1	38.2979
2020	W	LK	0.96	LL2	22.7273
2020	W	LK	0.96	LL3	0
2020	W	LK	0.96	LL4	0
2020	W	LK	0.96	LL5	2.04082
2020	W	LK	0.96	LL6	4.08163
2020	W	LK	0.96	LL7	0
2020	W	LK	0.96	LL8	0
2020	W	LK	0.96	LL9	8.33333
2020	W	LK	0.96	LL10	2.12766
2020	W	LKT	2.6545	HH1	0
2020	W	LKT	2.6545	HH2	0
2020	W	LKT	2.6545	HH3	0
2020	W	LKT	2.6545	HH4	0
2020	W	LKT	2.6545	HH5	0
2020	W	LKT	2.6545	HH6	0
2020	W	LKT	2.6545	HH7	0
2020	W	LKT	2.6545	HH8	0
2020	W	LKT	2.6545	HH9	0
2020	W	LKT	2.6545	HH10	0
2020	W	LKT	2.3053	LH1	0
2020	W	LKT	2.3053	LH2	0
2020	W	LKT	2.3053	LH3	0
2020	W	LKT	2.3053	LH4	0
2020	W	LKT	2.3053	LH5	0
2020	W	LKT	2.3053	LH6	0
2020	W	LKT	2.3053	LH7	0
2020	W	LKT	2.3053	LH8	0
2020	W	LKT	2.3053	LH9	0
2020	W	LKT	2.3053	LH10	0
2020	W	LKT	1.9561	HM1	0
2020	W	LKT	1.9561	HM2	0
2020	W	LKT	1.9561	HM3	0
2020	W	LKT	1.9561	HM4	0
2020	W	LKT	1.9561	HM5	0
2020	W	LKT	1.9561	HM6	0
2020	W	LKT	1.9561	HM7	0
2020	W	LKT	1.9561	HM8	0
2020	W	LKT	1.9561	HM9	0
2020	W	LKT	1.9561	HM10	0
2020	W	LKT	1.6069	LM1	6.12245
2020	W	LKT	1.6069	LM2	12.5
2020	W	LKT	1.6069	LM3	0
2020	W	LKT	1.6069	LM4	0
2020	W	LKT	1.6069	LM5	4.16667
2020	W	LKT	1.6069	LM6	8.16327
2020	W	LKT	1.6069	LM7	2.12766
2020	W	LKT	1.6069	LM8	18.3673
2020	W	LKT	1.6069	LM9	9.09091
2020	W	LKT	1.6069	LM10	0
2020	W	LKT	1.2577	HL1	2.04082
2020	W	LKT	1.2577	HL2	2.08333
2020	W	LKT	1.2577	HL3	0
2020	W	LKT	1.2577	HL4	0
2020	W	LKT	1.2577	HL5	0
2020	W	LKT	1.2577	HL6	4.54545
2020	W	LKT	1.2577	HL7	0
2020	W	LKT	1.2577	HL8	2.04082
2020	W	LKT	1.2577	HL9	0
2020	W	LKT	1.2577	HL10	6.25
2020	W	LKT	0.9085	LL1	NA
2020	W	LKT	0.9085	LL2	NA
2020	W	LKT	0.9085	LL3	NA
2020	W	LKT	0.9085	LL4	NA
2020	W	LKT	0.9085	LL5	NA
2020	W	LKT	0.9085	LL6	NA
2020	W	LKT	0.9085	LL7	NA
2020	W	LKT	0.9085	LL8	NA
2020	W	LKT	0.9085	LL9	NA
2020	W	LKT	0.9085	LL10	NA
2020	W	SL	2.833	HH1	0
2020	W	SL	2.833	HH2	0
2020	W	SL	2.833	HH3	0
2020	W	SL	2.833	HH4	0
2020	W	SL	2.833	HH5	0
2020	W	SL	2.833	HH6	0
2020	W	SL	2.833	HH7	0
2020	W	SL	2.833	HH8	0
2020	W	SL	2.833	HH9	0
2020	W	SL	2.833	HH10	0
2020	W	SL	2.3998	LH1	0
2020	W	SL	2.3998	LH2	0
2020	W	SL	2.3998	LH3	0
2020	W	SL	2.3998	LH4	0
2020	W	SL	2.3998	LH5	0
2020	W	SL	2.3998	LH6	0
2020	W	SL	2.3998	LH7	0
2020	W	SL	2.3998	LH8	0
2020	W	SL	2.3998	LH9	0
2020	W	SL	2.3998	LH10	0
2020	W	SL	1.9666	HM1	0
2020	W	SL	1.9666	HM2	0
2020	W	SL	1.9666	HM3	0
2020	W	SL	1.9666	HM4	0
2020	W	SL	1.9666	HM5	0
2020	W	SL	1.9666	HM6	0
2020	W	SL	1.9666	HM7	0
2020	W	SL	1.9666	HM8	0
2020	W	SL	1.9666	HM9	0
2020	W	SL	1.9666	HM10	0
2020	W	SL	1.5334	LM1	0
2020	W	SL	1.5334	LM2	0
2020	W	SL	1.5334	LM3	0
2020	W	SL	1.5334	LM4	0
2020	W	SL	1.5334	LM5	0
2020	W	SL	1.5334	LM6	0
2020	W	SL	1.5334	LM7	0
2020	W	SL	1.5334	LM8	4.44444
2020	W	SL	1.5334	LM9	0
2020	W	SL	1.5334	LM10	0
2020	W	SL	1.1002	HL1	2.32558
2020	W	SL	1.1002	HL2	4.65116
2020	W	SL	1.1002	HL3	0
2020	W	SL	1.1002	HL4	0
2020	W	SL	1.1002	HL5	0
2020	W	SL	1.1002	HL6	0
2020	W	SL	1.1002	HL7	0
2020	W	SL	1.1002	HL8	0
2020	W	SL	1.1002	HL9	0
2020	W	SL	1.1002	HL10	0
2020	W	SL	0.667	LL1	NA
2020	W	SL	0.667	LL2	NA
2020	W	SL	0.667	LL3	NA
2020	W	SL	0.667	LL4	NA
2020	W	SL	0.667	LL5	NA
2020	W	SL	0.667	LL6	NA
2020	W	SL	0.667	LL7	NA
2020	W	SL	0.667	LL8	NA
2020	W	SL	0.667	LL9	NA
2020	W	SL	0.667	LL10	NA
2020	W	TO	2.3065	HH1	0
2020	W	TO	2.3065	HH2	0
2020	W	TO	2.3065	HH3	0
2020	W	TO	2.3065	HH4	0
2020	W	TO	2.3065	HH5	0
2020	W	TO	2.3065	HH6	0
2020	W	TO	2.3065	HH7	0
2020	W	TO	2.3065	HH8	0
2020	W	TO	2.3065	HH9	0
2020	W	TO	2.3065	HH10	0
2020	W	TO	2.0325	LH1	0
2020	W	TO	2.0325	LH2	0
2020	W	TO	2.0325	LH3	0
2020	W	TO	2.0325	LH4	0
2020	W	TO	2.0325	LH5	0
2020	W	TO	2.0325	LH6	0
2020	W	TO	2.0325	LH7	0
2020	W	TO	2.0325	LH8	0
2020	W	TO	2.0325	LH9	0
2020	W	TO	2.0325	LH10	0
2020	W	TO	1.7585	HM1	0
2020	W	TO	1.7585	HM2	0
2020	W	TO	1.7585	HM3	0
2020	W	TO	1.7585	HM4	2.08333
2020	W	TO	1.7585	HM5	0
2020	W	TO	1.7585	HM6	0
2020	W	TO	1.7585	HM7	0
2020	W	TO	1.7585	HM8	0
2020	W	TO	1.7585	HM9	0
2020	W	TO	1.7585	HM10	0
2020	W	TO	1.4845	LM1	4.16667
2020	W	TO	1.4845	LM2	0
2020	W	TO	1.4845	LM3	0
2020	W	TO	1.4845	LM4	2.08333
2020	W	TO	1.4845	LM5	2.12766
2020	W	TO	1.4845	LM6	0
2020	W	TO	1.4845	LM7	6.81818
2020	W	TO	1.4845	LM8	6.25
2020	W	TO	1.4845	LM9	0
2020	W	TO	1.4845	LM10	4.16667
2020	W	TO	1.2105	HL1	2.12766
2020	W	TO	1.2105	HL2	0
2020	W	TO	1.2105	HL3	0
2020	W	TO	1.2105	HL4	10.6383
2020	W	TO	1.2105	HL5	0
2020	W	TO	1.2105	HL6	2.08333
2020	W	TO	1.2105	HL7	4.08163
2020	W	TO	1.2105	HL8	4.25532
2020	W	TO	1.2105	HL9	0
2020	W	TO	1.2105	HL10	4.34783
2020	W	TO	0.9365	LL1	0
2020	W	TO	0.9365	LL2	0
2020	W	TO	0.9365	LL3	0
2020	W	TO	0.9365	LL4	0
2020	W	TO	0.9365	LL5	0
2020	W	TO	0.9365	LL6	0
2020	W	TO	0.9365	LL7	2.12766
2020	W	TO	0.9365	LL8	0
2020	W	TO	0.9365	LL9	0
2020	W	TO	0.9365	LL10	0
2020	W	MB	2.1425	HH1	0
2020	W	MB	2.1425	HH2	0
2020	W	MB	2.1425	HH3	0
2020	W	MB	2.1425	HH4	0
2020	W	MB	2.1425	HH5	0
2020	W	MB	2.1425	HH6	0
2020	W	MB	2.1425	HH7	0
2020	W	MB	2.1425	HH8	0
2020	W	MB	2.1425	HH9	0
2020	W	MB	2.1425	HH10	0
2020	W	MB	1.8933	LH1	0
2020	W	MB	1.8933	LH2	0
2020	W	MB	1.8933	LH3	0
2020	W	MB	1.8933	LH4	0
2020	W	MB	1.8933	LH5	0
2020	W	MB	1.8933	LH6	0
2020	W	MB	1.8933	LH7	0
2020	W	MB	1.8933	LH8	0
2020	W	MB	1.8933	LH9	0
2020	W	MB	1.8933	LH10	0
2020	W	MB	1.6441	HM1	0
2020	W	MB	1.6441	HM2	0
2020	W	MB	1.6441	HM3	0
2020	W	MB	1.6441	HM4	0
2020	W	MB	1.6441	HM5	0
2020	W	MB	1.6441	HM6	0
2020	W	MB	1.6441	HM7	0
2020	W	MB	1.6441	HM8	0
2020	W	MB	1.6441	HM9	0
2020	W	MB	1.6441	HM10	0
2020	W	MB	1.3949	LM1	0
2020	W	MB	1.3949	LM2	0
2020	W	MB	1.3949	LM3	0
2020	W	MB	1.3949	LM4	0
2020	W	MB	1.3949	LM5	0
2020	W	MB	1.3949	LM6	0
2020	W	MB	1.3949	LM7	0
2020	W	MB	1.3949	LM8	0
2020	W	MB	1.3949	LM9	0
2020	W	MB	1.3949	LM10	2.04082
2020	W	MB	1.1457	HL1	0
2020	W	MB	1.1457	HL2	0
2020	W	MB	1.1457	HL3	0
2020	W	MB	1.1457	HL4	0
2020	W	MB	1.1457	HL5	10.8696
2020	W	MB	1.1457	HL6	0
2020	W	MB	1.1457	HL7	0
2020	W	MB	1.1457	HL8	0
2020	W	MB	1.1457	HL9	2.17391
2020	W	MB	1.1457	HL10	0
2020	W	MB	0.8965	LL1	NA
2020	W	MB	0.8965	LL2	NA
2020	W	MB	0.8965	LL3	NA
2020	W	MB	0.8965	LL4	NA
2020	W	MB	0.8965	LL5	NA
2020	W	MB	0.8965	LL6	NA
2020	W	MB	0.8965	LL7	NA
2020	W	MB	0.8965	LL8	NA
2020	W	MB	0.8965	LL9	NA
2020	W	MB	0.8965	LL10	NA
2020	W	SO	2.767	HH1	0
2020	W	SO	2.767	HH2	0
2020	W	SO	2.767	HH3	0
2020	W	SO	2.767	HH4	0
2020	W	SO	2.767	HH5	0
2020	W	SO	2.767	HH6	0
2020	W	SO	2.767	HH7	0
2020	W	SO	2.767	HH8	0
2020	W	SO	2.767	HH9	0
2020	W	SO	2.767	HH10	0
2020	W	SO	2.374	LH1	0
2020	W	SO	2.374	LH2	0
2020	W	SO	2.374	LH3	0
2020	W	SO	2.374	LH4	0
2020	W	SO	2.374	LH5	0
2020	W	SO	2.374	LH6	0
2020	W	SO	2.374	LH7	0
2020	W	SO	2.374	LH8	0
2020	W	SO	2.374	LH9	0
2020	W	SO	2.374	LH10	0
2020	W	SO	1.981	HM1	0
2020	W	SO	1.981	HM2	0
2020	W	SO	1.981	HM3	0
2020	W	SO	1.981	HM4	0
2020	W	SO	1.981	HM5	0
2020	W	SO	1.981	HM6	0
2020	W	SO	1.981	HM7	0
2020	W	SO	1.981	HM8	0
2020	W	SO	1.981	HM9	0
2020	W	SO	1.981	HM10	0
2020	W	SO	1.588	LM1	0
2020	W	SO	1.588	LM2	0
2020	W	SO	1.588	LM3	0
2020	W	SO	1.588	LM4	0
2020	W	SO	1.588	LM5	0
2020	W	SO	1.588	LM6	0
2020	W	SO	1.588	LM7	0
2020	W	SO	1.588	LM8	0
2020	W	SO	1.588	LM9	0
2020	W	SO	1.588	LM10	0
2020	W	SO	1.195	HL1	NA
2020	W	SO	1.195	HL2	NA
2020	W	SO	1.195	HL3	NA
2020	W	SO	1.195	HL4	NA
2020	W	SO	1.195	HL5	NA
2020	W	SO	1.195	HL6	NA
2020	W	SO	1.195	HL7	NA
2020	W	SO	1.195	HL8	NA
2020	W	SO	1.195	HL9	NA
2020	W	SO	1.195	HL10	NA
2020	W	SO	0.802	LL1	NA
2020	W	SO	0.802	LL2	NA
2020	W	SO	0.802	LL3	NA
2020	W	SO	0.802	LL4	NA
2020	W	SO	0.802	LL5	NA
2020	W	SO	0.802	LL6	NA
2020	W	SO	0.802	LL7	NA
2020	W	SO	0.802	LL8	NA
2020	W	SO	0.802	LL9	NA
2020	W	SO	0.802	LL10	NA
2020	W	TT	2.5585	HH1	0
2020	W	TT	2.5585	HH2	0
2020	W	TT	2.5585	HH3	0
2020	W	TT	2.5585	HH4	0
2020	W	TT	2.5585	HH5	0
2020	W	TT	2.5585	HH6	0
2020	W	TT	2.5585	HH7	0
2020	W	TT	2.5585	HH8	0
2020	W	TT	2.5585	HH9	0
2020	W	TT	2.5585	HH10	0
2020	W	TT	2.2329	LH1	0
2020	W	TT	2.2329	LH2	0
2020	W	TT	2.2329	LH3	0
2020	W	TT	2.2329	LH4	0
2020	W	TT	2.2329	LH5	0
2020	W	TT	2.2329	LH6	0
2020	W	TT	2.2329	LH7	0
2020	W	TT	2.2329	LH8	0
2020	W	TT	2.2329	LH9	0
2020	W	TT	2.2329	LH10	0
2020	W	TT	1.9073	HM1	0
2020	W	TT	1.9073	HM2	10.4167
2020	W	TT	1.9073	HM3	6.12245
2020	W	TT	1.9073	HM4	0
2020	W	TT	1.9073	HM5	2.08333
2020	W	TT	1.9073	HM6	0
2020	W	TT	1.9073	HM7	0
2020	W	TT	1.9073	HM8	0
2020	W	TT	1.9073	HM9	0
2020	W	TT	1.9073	HM10	0
2020	W	TT	1.5817	LM1	29.1667
2020	W	TT	1.5817	LM2	39.5833
2020	W	TT	1.5817	LM3	6.12245
2020	W	TT	1.5817	LM4	17.0213
2020	W	TT	1.5817	LM5	28.5714
2020	W	TT	1.5817	LM6	40.8163
2020	W	TT	1.5817	LM7	0
2020	W	TT	1.5817	LM8	0
2020	W	TT	1.5817	LM9	0
2020	W	TT	1.5817	LM10	16.3265
2020	W	TT	1.2561	HL1	47.9167
2020	W	TT	1.2561	HL2	18.3673
2020	W	TT	1.2561	HL3	42.5532
2020	W	TT	1.2561	HL4	45.6522
2020	W	TT	1.2561	HL5	0
2020	W	TT	1.2561	HL6	10.4167
2020	W	TT	1.2561	HL7	20.4082
2020	W	TT	1.2561	HL8	41.6667
2020	W	TT	1.2561	HL9	53.3333
2020	W	TT	1.2561	HL10	2.12766
2020	W	TT	0.9305	LL1	NA
2020	W	TT	0.9305	LL2	NA
2020	W	TT	0.9305	LL3	NA
2020	W	TT	0.9305	LL4	NA
2020	W	TT	0.9305	LL5	NA
2020	W	TT	0.9305	LL6	NA
2020	W	TT	0.9305	LL7	NA
2020	W	TT	0.9305	LL8	NA
2020	W	TT	0.9305	LL9	NA
2020	W	TT	0.9305	LL10	NA
2020	W	WF	2.773	HH1	0
2020	W	WF	2.773	HH2	0
2020	W	WF	2.773	HH3	0
2020	W	WF	2.773	HH4	0
2020	W	WF	2.773	HH5	0
2020	W	WF	2.773	HH6	0
2020	W	WF	2.773	HH7	0
2020	W	WF	2.773	HH8	0
2020	W	WF	2.773	HH9	0
2020	W	WF	2.773	HH10	0
2020	W	WF	2.3875	LH1	0
2020	W	WF	2.3875	LH2	0
2020	W	WF	2.3875	LH3	0
2020	W	WF	2.3875	LH4	0
2020	W	WF	2.3875	LH5	0
2020	W	WF	2.3875	LH6	0
2020	W	WF	2.3875	LH7	0
2020	W	WF	2.3875	LH8	0
2020	W	WF	2.3875	LH9	0
2020	W	WF	2.3875	LH10	0
2020	W	WF	2.002	HM1	0
2020	W	WF	2.002	HM2	0
2020	W	WF	2.002	HM3	0
2020	W	WF	2.002	HM4	0
2020	W	WF	2.002	HM5	0
2020	W	WF	2.002	HM6	0
2020	W	WF	2.002	HM7	0
2020	W	WF	2.002	HM8	0
2020	W	WF	2.002	HM9	0
2020	W	WF	2.002	HM10	0
2020	W	WF	1.6165	LM1	0
2020	W	WF	1.6165	LM2	0
2020	W	WF	1.6165	LM3	0
2020	W	WF	1.6165	LM4	0
2020	W	WF	1.6165	LM5	0
2020	W	WF	1.6165	LM6	0
2020	W	WF	1.6165	LM7	0
2020	W	WF	1.6165	LM8	0
2020	W	WF	1.6165	LM9	0
2020	W	WF	1.6165	LM10	0
2020	W	WF	1.231	HL1	0
2020	W	WF	1.231	HL2	0
2020	W	WF	1.231	HL3	0
2020	W	WF	1.231	HL4	0
2020	W	WF	1.231	HL5	0
2020	W	WF	1.231	HL6	0
2020	W	WF	1.231	HL7	4.16667
2020	W	WF	1.231	HL8	0
2020	W	WF	1.231	HL9	0
2020	W	WF	1.231	HL10	0
2020	W	WF	0.8455	LL1	NA
2020	W	WF	0.8455	LL2	NA
2020	W	WF	0.8455	LL3	NA
2020	W	WF	0.8455	LL4	NA
2020	W	WF	0.8455	LL5	NA
2020	W	WF	0.8455	LL6	NA
2020	W	WF	0.8455	LL7	NA
2020	W	WF	0.8455	LL8	NA
2020	W	WF	0.8455	LL9	NA
2020	W	WF	0.8455	LL10	NA
2020	W	PC	3.122	HH1	0
2020	W	PC	3.122	HH2	0
2020	W	PC	3.122	HH3	0
2020	W	PC	3.122	HH4	0
2020	W	PC	3.122	HH5	0
2020	W	PC	3.122	HH6	0
2020	W	PC	3.122	HH7	0
2020	W	PC	3.122	HH8	0
2020	W	PC	3.122	HH9	0
2020	W	PC	3.122	HH10	0
2020	W	PC	2.6892	LH1	0
2020	W	PC	2.6892	LH2	0
2020	W	PC	2.6892	LH3	0
2020	W	PC	2.6892	LH4	0
2020	W	PC	2.6892	LH5	0
2020	W	PC	2.6892	LH6	0
2020	W	PC	2.6892	LH7	0
2020	W	PC	2.6892	LH8	0
2020	W	PC	2.6892	LH9	0
2020	W	PC	2.6892	LH10	0
2020	W	PC	2.2564	HM1	0
2020	W	PC	2.2564	HM2	0
2020	W	PC	2.2564	HM3	0
2020	W	PC	2.2564	HM4	0
2020	W	PC	2.2564	HM5	0
2020	W	PC	2.2564	HM6	0
2020	W	PC	2.2564	HM7	0
2020	W	PC	2.2564	HM8	0
2020	W	PC	2.2564	HM9	0
2020	W	PC	2.2564	HM10	0
2020	W	PC	1.8236	LM1	0
2020	W	PC	1.8236	LM2	0
2020	W	PC	1.8236	LM3	0
2020	W	PC	1.8236	LM4	0
2020	W	PC	1.8236	LM5	0
2020	W	PC	1.8236	LM6	0
2020	W	PC	1.8236	LM7	0
2020	W	PC	1.8236	LM8	0
2020	W	PC	1.8236	LM9	0
2020	W	PC	1.8236	LM10	0
2020	W	PC	1.3908	HL1	0
2020	W	PC	1.3908	HL2	0
2020	W	PC	1.3908	HL3	0
2020	W	PC	1.3908	HL4	0
2020	W	PC	1.3908	HL5	0
2020	W	PC	1.3908	HL6	0
2020	W	PC	1.3908	HL7	0
2020	W	PC	1.3908	HL8	0
2020	W	PC	1.3908	HL9	0
2020	W	PC	1.3908	HL10	0
2020	W	PC	0.958	LL1	NA
2020	W	PC	0.958	LL2	NA
2020	W	PC	0.958	LL3	NA
2020	W	PC	0.958	LL4	NA
2020	W	PC	0.958	LL5	NA
2020	W	PC	0.958	LL6	NA
2020	W	PC	0.958	LL7	NA
2020	W	PC	0.958	LL8	NA
2020	W	PC	0.958	LL9	NA
2020	W	PC	0.958	LL10	NA
2020	W	PO	2.348	HH1	0
2020	W	PO	2.348	HH2	0
2020	W	PO	2.348	HH3	0
2020	W	PO	2.348	HH4	0
2020	W	PO	2.348	HH5	0
2020	W	PO	2.348	HH6	0
2020	W	PO	2.348	HH7	0
2020	W	PO	2.348	HH8	0
2020	W	PO	2.348	HH9	0
2020	W	PO	2.348	HH10	0
2020	W	PO	2.0475	LH1	0
2020	W	PO	2.0475	LH2	0
2020	W	PO	2.0475	LH3	0
2020	W	PO	2.0475	LH4	0
2020	W	PO	2.0475	LH5	0
2020	W	PO	2.0475	LH6	0
2020	W	PO	2.0475	LH7	0
2020	W	PO	2.0475	LH8	0
2020	W	PO	2.0475	LH9	0
2020	W	PO	2.0475	LH10	0
2020	W	PO	1.747	HM1	24.4898
2020	W	PO	1.747	HM2	22.449
2020	W	PO	1.747	HM3	20.8333
2020	W	PO	1.747	HM4	8.16327
2020	W	PO	1.747	HM5	0
2020	W	PO	1.747	HM6	18.3673
2020	W	PO	1.747	HM7	2.04082
2020	W	PO	1.747	HM8	6.25
2020	W	PO	1.747	HM9	0
2020	W	PO	1.747	HM10	2.04082
2020	W	PO	1.4465	LM1	0
2020	W	PO	1.4465	LM2	0
2020	W	PO	1.4465	LM3	0
2020	W	PO	1.4465	LM4	0
2020	W	PO	1.4465	LM5	0
2020	W	PO	1.4465	LM6	0
2020	W	PO	1.4465	LM7	0
2020	W	PO	1.4465	LM8	0
2020	W	PO	1.4465	LM9	0
2020	W	PO	1.4465	LM10	0
2020	W	PO	1.146	HL1	58.3333
2020	W	PO	1.146	HL2	6.25
2020	W	PO	1.146	HL3	0
2020	W	PO	1.146	HL4	8.16327
2020	W	PO	1.146	HL5	0
2020	W	PO	1.146	HL6	12.2449
2020	W	PO	1.146	HL7	8.69565
2020	W	PO	1.146	HL8	0
2020	W	PO	1.146	HL9	19.0476
2020	W	PO	1.146	HL10	0
2020	W	PO	0.8455	LL1	60.8696
2020	W	PO	0.8455	LL2	37.7778
2020	W	PO	0.8455	LL3	39.5349
2020	W	PO	0.8455	LL4	46.9388
2020	W	PO	0.8455	LL5	26.5306
2020	W	PO	0.8455	LL6	8.51064
2020	W	PO	0.8455	LL7	40.4255
2020	W	PO	0.8455	LL8	58.6957
2020	W	PO	0.8455	LL9	34.7826
2020	W	PO	0.8455	LL10	53.6585
2020	W	ST	2.7035	HH1	0
2020	W	ST	2.7035	HH2	0
2020	W	ST	2.7035	HH3	0
2020	W	ST	2.7035	HH4	0
2020	W	ST	2.7035	HH5	0
2020	W	ST	2.7035	HH6	0
2020	W	ST	2.7035	HH7	0
2020	W	ST	2.7035	HH8	0
2020	W	ST	2.7035	HH9	0
2020	W	ST	2.7035	HH10	0
2020	W	ST	2.3356	LH1	0
2020	W	ST	2.3356	LH2	0
2020	W	ST	2.3356	LH3	0
2020	W	ST	2.3356	LH4	0
2020	W	ST	2.3356	LH5	0
2020	W	ST	2.3356	LH6	0
2020	W	ST	2.3356	LH7	0
2020	W	ST	2.3356	LH8	0
2020	W	ST	2.3356	LH9	0
2020	W	ST	2.3356	LH10	0
2020	W	ST	1.9677	HM1	0
2020	W	ST	1.9677	HM2	0
2020	W	ST	1.9677	HM3	0
2020	W	ST	1.9677	HM4	0
2020	W	ST	1.9677	HM5	0
2020	W	ST	1.9677	HM6	0
2020	W	ST	1.9677	HM7	0
2020	W	ST	1.9677	HM8	0
2020	W	ST	1.9677	HM9	0
2020	W	ST	1.9677	HM10	0
2020	W	ST	1.5998	LM1	0
2020	W	ST	1.5998	LM2	0
2020	W	ST	1.5998	LM3	0
2020	W	ST	1.5998	LM4	0
2020	W	ST	1.5998	LM5	0
2020	W	ST	1.5998	LM6	0
2020	W	ST	1.5998	LM7	0
2020	W	ST	1.5998	LM8	0
2020	W	ST	1.5998	LM9	0
2020	W	ST	1.5998	LM10	0
2020	W	ST	1.2319	HL1	0
2020	W	ST	1.2319	HL2	20.8333
2020	W	ST	1.2319	HL3	27.0833
2020	W	ST	1.2319	HL4	25.5319
2020	W	ST	1.2319	HL5	65.9574
2020	W	ST	1.2319	HL6	43.75
2020	W	ST	1.2319	HL7	39.1304
2020	W	ST	1.2319	HL8	36.1702
2020	W	ST	1.2319	HL9	48.8889
2020	W	ST	1.2319	HL10	29.1667
2020	W	ST	0.864	LL1	NA
2020	W	ST	0.864	LL2	NA
2020	W	ST	0.864	LL3	NA
2020	W	ST	0.864	LL4	NA
2020	W	ST	0.864	LL5	NA
2020	W	ST	0.864	LL6	NA
2020	W	ST	0.864	LL7	NA
2020	W	ST	0.864	LL8	NA
2020	W	ST	0.864	LL9	NA
2020	W	ST	0.864	LL10	NA
2020	W	TLW	3.6325	HH1	0
2020	W	TLW	3.6325	HH2	0
2020	W	TLW	3.6325	HH3	0
2020	W	TLW	3.6325	HH4	0
2020	W	TLW	3.6325	HH5	0
2020	W	TLW	3.6325	HH6	0
2020	W	TLW	3.6325	HH7	0
2020	W	TLW	3.6325	HH8	0
2020	W	TLW	3.6325	HH9	0
2020	W	TLW	3.6325	HH10	0
2020	W	TLW	3.0865	LH1	0
2020	W	TLW	3.0865	LH2	0
2020	W	TLW	3.0865	LH3	0
2020	W	TLW	3.0865	LH4	0
2020	W	TLW	3.0865	LH5	0
2020	W	TLW	3.0865	LH6	0
2020	W	TLW	3.0865	LH7	0
2020	W	TLW	3.0865	LH8	0
2020	W	TLW	3.0865	LH9	0
2020	W	TLW	3.0865	LH10	0
2020	W	TLW	2.5405	HM1	0
2020	W	TLW	2.5405	HM2	0
2020	W	TLW	2.5405	HM3	0
2020	W	TLW	2.5405	HM4	0
2020	W	TLW	2.5405	HM5	0
2020	W	TLW	2.5405	HM6	0
2020	W	TLW	2.5405	HM7	0
2020	W	TLW	2.5405	HM8	0
2020	W	TLW	2.5405	HM9	0
2020	W	TLW	2.5405	HM10	0
2020	W	TLW	1.9945	LM1	0
2020	W	TLW	1.9945	LM2	0
2020	W	TLW	1.9945	LM3	0
2020	W	TLW	1.9945	LM4	0
2020	W	TLW	1.9945	LM5	0
2020	W	TLW	1.9945	LM6	0
2020	W	TLW	1.9945	LM7	0
2020	W	TLW	1.9945	LM8	0
2020	W	TLW	1.9945	LM9	0
2020	W	TLW	1.9945	LM10	0
2020	W	TLW	1.4485	HL1	0
2020	W	TLW	1.4485	HL2	0
2020	W	TLW	1.4485	HL3	0
2020	W	TLW	1.4485	HL4	0
2020	W	TLW	1.4485	HL5	0
2020	W	TLW	1.4485	HL6	0
2020	W	TLW	1.4485	HL7	0
2020	W	TLW	1.4485	HL8	0
2020	W	TLW	1.4485	HL9	0
2020	W	TLW	1.4485	HL10	0
2020	W	TLW	0.9025	LL1	NA
2020	W	TLW	0.9025	LL2	NA
2020	W	TLW	0.9025	LL3	NA
2020	W	TLW	0.9025	LL4	NA
2020	W	TLW	0.9025	LL5	NA
2020	W	TLW	0.9025	LL6	NA
2020	W	TLW	0.9025	LL7	NA
2020	W	TLW	0.9025	LL8	NA
2020	W	TLW	0.9025	LL9	NA
2020	W	TLW	0.9025	LL10	NA
2020	W	LCC	2.3015	HH1	0
2020	W	LCC	2.3015	HH2	0
2020	W	LCC	2.3015	HH3	0
2020	W	LCC	2.3015	HH4	0
2020	W	LCC	2.3015	HH5	0
2020	W	LCC	2.3015	HH6	0
2020	W	LCC	2.3015	HH7	0
2020	W	LCC	2.3015	HH8	0
2020	W	LCC	2.3015	HH9	0
2020	W	LCC	2.3015	HH10	0
2020	W	LCC	2.0628	LH1	0
2020	W	LCC	2.0628	LH2	0
2020	W	LCC	2.0628	LH3	0
2020	W	LCC	2.0628	LH4	0
2020	W	LCC	2.0628	LH5	0
2020	W	LCC	2.0628	LH6	0
2020	W	LCC	2.0628	LH7	0
2020	W	LCC	2.0628	LH8	0
2020	W	LCC	2.0628	LH9	0
2020	W	LCC	2.0628	LH10	0
2020	W	LCC	1.8241	HM1	0
2020	W	LCC	1.8241	HM2	0
2020	W	LCC	1.8241	HM3	0
2020	W	LCC	1.8241	HM4	2.04082
2020	W	LCC	1.8241	HM5	4.08163
2020	W	LCC	1.8241	HM6	0
2020	W	LCC	1.8241	HM7	4.16667
2020	W	LCC	1.8241	HM8	0
2020	W	LCC	1.8241	HM9	0
2020	W	LCC	1.8241	HM10	0
2020	W	LCC	1.5854	LM1	14.2857
2020	W	LCC	1.5854	LM2	20.4082
2020	W	LCC	1.5854	LM3	10.4167
2020	W	LCC	1.5854	LM4	2.08333
2020	W	LCC	1.5854	LM5	12.5
2020	W	LCC	1.5854	LM6	8.69565
2020	W	LCC	1.5854	LM7	2.08333
2020	W	LCC	1.5854	LM8	0
2020	W	LCC	1.5854	LM9	0
2020	W	LCC	1.5854	LM10	0
2020	W	LCC	1.3467	HL1	48.9796
2020	W	LCC	1.3467	HL2	56.5217
2020	W	LCC	1.3467	HL3	6.38298
2020	W	LCC	1.3467	HL4	14.2857
2020	W	LCC	1.3467	HL5	19.1489
2020	W	LCC	1.3467	HL6	8.16327
2020	W	LCC	1.3467	HL7	2.04082
2020	W	LCC	1.3467	HL8	14.2857
2020	W	LCC	1.3467	HL9	21.7391
2020	W	LCC	1.3467	HL10	2.08333
2020	W	LCC	1.108	LL1	22.9167
2020	W	LCC	1.108	LL2	14.8936
2020	W	LCC	1.108	LL3	10.8696
2020	W	LCC	1.108	LL4	6.38298
2020	W	LCC	1.108	LL5	6.12245
2020	W	LCC	1.108	LL6	2.04082
2020	W	LCC	1.108	LL7	19.5652
2020	W	LCC	1.108	LL8	2.04082
2020	W	LCC	1.108	LL9	8.88889
2020	W	LCC	1.108	LL10	2.04082
2020	W	MSC	2.829	HH1	0
2020	W	MSC	2.829	HH2	0
2020	W	MSC	2.829	HH3	0
2020	W	MSC	2.829	HH4	0
2020	W	MSC	2.829	HH5	0
2020	W	MSC	2.829	HH6	0
2020	W	MSC	2.829	HH7	0
2020	W	MSC	2.829	HH8	0
2020	W	MSC	2.829	HH9	0
2020	W	MSC	2.829	HH10	0
2020	W	MSC	2.4506	LH1	0
2020	W	MSC	2.4506	LH2	0
2020	W	MSC	2.4506	LH3	0
2020	W	MSC	2.4506	LH4	0
2020	W	MSC	2.4506	LH5	0
2020	W	MSC	2.4506	LH6	0
2020	W	MSC	2.4506	LH7	0
2020	W	MSC	2.4506	LH8	0
2020	W	MSC	2.4506	LH9	0
2020	W	MSC	2.4506	LH10	0
2020	W	MSC	2.0722	HM1	0
2020	W	MSC	2.0722	HM2	0
2020	W	MSC	2.0722	HM3	0
2020	W	MSC	2.0722	HM4	0
2020	W	MSC	2.0722	HM5	0
2020	W	MSC	2.0722	HM6	0
2020	W	MSC	2.0722	HM7	2.04082
2020	W	MSC	2.0722	HM8	0
2020	W	MSC	2.0722	HM9	0
2020	W	MSC	2.0722	HM10	0
2020	W	MSC	1.6938	LM1	0
2020	W	MSC	1.6938	LM2	2.04082
2020	W	MSC	1.6938	LM3	44.6809
2020	W	MSC	1.6938	LM4	45.8333
2020	W	MSC	1.6938	LM5	52.0833
2020	W	MSC	1.6938	LM6	2.08333
2020	W	MSC	1.6938	LM7	19.1489
2020	W	MSC	1.6938	LM8	30.6122
2020	W	MSC	1.6938	LM9	4.16667
2020	W	MSC	1.6938	LM10	8.16327
2020	W	MSC	1.3154	HL1	21.2766
2020	W	MSC	1.3154	HL2	0
2020	W	MSC	1.3154	HL3	51.1111
2020	W	MSC	1.3154	HL4	56.8182
2020	W	MSC	1.3154	HL5	59.5745
2020	W	MSC	1.3154	HL6	20.8333
2020	W	MSC	1.3154	HL7	77.0833
2020	W	MSC	1.3154	HL8	85.4167
2020	W	MSC	1.3154	HL9	10.4167
2020	W	MSC	1.3154	HL10	20
2020	W	MSC	0.937	LL1	NA
2020	W	MSC	0.937	LL2	NA
2020	W	MSC	0.937	LL3	NA
2020	W	MSC	0.937	LL4	NA
2020	W	MSC	0.937	LL5	NA
2020	W	MSC	0.937	LL6	NA
2020	W	MSC	0.937	LL7	NA
2020	W	MSC	0.937	LL8	NA
2020	W	MSC	0.937	LL9	NA
2020	W	MSC	0.937	LL10	NA
2020	W	SB	2.8535	HH1	0
2020	W	SB	2.8535	HH2	0
2020	W	SB	2.8535	HH3	0
2020	W	SB	2.8535	HH4	0
2020	W	SB	2.8535	HH5	0
2020	W	SB	2.8535	HH6	0
2020	W	SB	2.8535	HH7	0
2020	W	SB	2.8535	HH8	0
2020	W	SB	2.8535	HH9	0
2020	W	SB	2.8535	HH10	0
2020	W	SB	2.5091	LH1	0
2020	W	SB	2.5091	LH2	0
2020	W	SB	2.5091	LH3	0
2020	W	SB	2.5091	LH4	0
2020	W	SB	2.5091	LH5	0
2020	W	SB	2.5091	LH6	0
2020	W	SB	2.5091	LH7	0
2020	W	SB	2.5091	LH8	0
2020	W	SB	2.5091	LH9	0
2020	W	SB	2.5091	LH10	0
2020	W	SB	2.1647	HM1	0
2020	W	SB	2.1647	HM2	0
2020	W	SB	2.1647	HM3	0
2020	W	SB	2.1647	HM4	0
2020	W	SB	2.1647	HM5	0
2020	W	SB	2.1647	HM6	0
2020	W	SB	2.1647	HM7	0
2020	W	SB	2.1647	HM8	2.08333
2020	W	SB	2.1647	HM9	0
2020	W	SB	2.1647	HM10	0
2020	W	SB	1.8203	LM1	4.08163
2020	W	SB	1.8203	LM2	8.16327
2020	W	SB	1.8203	LM3	18.3673
2020	W	SB	1.8203	LM4	2.04082
2020	W	SB	1.8203	LM5	4.08163
2020	W	SB	1.8203	LM6	0
2020	W	SB	1.8203	LM7	0
2020	W	SB	1.8203	LM8	0
2020	W	SB	1.8203	LM9	2.04082
2020	W	SB	1.8203	LM10	0
2020	W	SB	1.4759	HL1	74.4681
2020	W	SB	1.4759	HL2	79.5918
2020	W	SB	1.4759	HL3	70.8333
2020	W	SB	1.4759	HL4	60.8696
2020	W	SB	1.4759	HL5	76.5957
2020	W	SB	1.4759	HL6	78.7234
2020	W	SB	1.4759	HL7	61.9048
2020	W	SB	1.4759	HL8	0
2020	W	SB	1.4759	HL9	22.7273
2020	W	SB	1.4759	HL10	60
2020	W	SB	1.1315	LL1	NA
2020	W	SB	1.1315	LL2	NA
2020	W	SB	1.1315	LL3	NA
2020	W	SB	1.1315	LL4	NA
2020	W	SB	1.1315	LL5	NA
2020	W	SB	1.1315	LL6	NA
2020	W	SB	1.1315	LL7	NA
2020	W	SB	1.1315	LL8	NA
2020	W	SB	1.1315	LL9	NA
2020	W	SB	1.1315	LL10	NA
2020	W	TST	2.456	HH1	0
2020	W	TST	2.456	HH2	0
2020	W	TST	2.456	HH3	0
2020	W	TST	2.456	HH4	0
2020	W	TST	2.456	HH5	0
2020	W	TST	2.456	HH6	0
2020	W	TST	2.456	HH7	0
2020	W	TST	2.456	HH8	0
2020	W	TST	2.456	HH9	0
2020	W	TST	2.456	HH10	0
2020	W	TST	2.151	LH1	0
2020	W	TST	2.151	LH2	0
2020	W	TST	2.151	LH3	0
2020	W	TST	2.151	LH4	0
2020	W	TST	2.151	LH5	0
2020	W	TST	2.151	LH6	0
2020	W	TST	2.151	LH7	0
2020	W	TST	2.151	LH8	0
2020	W	TST	2.151	LH9	0
2020	W	TST	2.151	LH10	0
2020	W	TST	1.846	HM1	0
2020	W	TST	1.846	HM2	17.0213
2020	W	TST	1.846	HM3	0
2020	W	TST	1.846	HM4	0
2020	W	TST	1.846	HM5	0
2020	W	TST	1.846	HM6	28.5714
2020	W	TST	1.846	HM7	0
2020	W	TST	1.846	HM8	26.5306
2020	W	TST	1.846	HM9	22.9167
2020	W	TST	1.846	HM10	0
2020	W	TST	1.541	LM1	42.5532
2020	W	TST	1.541	LM2	23.4043
2020	W	TST	1.541	LM3	4.25532
2020	W	TST	1.541	LM4	34.7826
2020	W	TST	1.541	LM5	25.5319
2020	W	TST	1.541	LM6	42.5532
2020	W	TST	1.541	LM7	50
2020	W	TST	1.541	LM8	64.5833
2020	W	TST	1.541	LM9	19.1489
2020	W	TST	1.541	LM10	58.3333
2020	W	TST	1.236	HL1	0
2020	W	TST	1.236	HL2	10.6383
2020	W	TST	1.236	HL3	12.2449
2020	W	TST	1.236	HL4	2.12766
2020	W	TST	1.236	HL5	26.6667
2020	W	TST	1.236	HL6	50
2020	W	TST	1.236	HL7	39.1304
2020	W	TST	1.236	HL8	48.9362
2020	W	TST	1.236	HL9	41.6667
2020	W	TST	1.236	HL10	19.5652
2020	W	TST	0.931	LL1	NA
2020	W	TST	0.931	LL2	NA
2020	W	TST	0.931	LL3	NA
2020	W	TST	0.931	LL4	NA
2020	W	TST	0.931	LL5	NA
2020	W	TST	0.931	LL6	NA
2020	W	TST	0.931	LL7	NA
2020	W	TST	0.931	LL8	NA
2020	W	TST	0.931	LL9	NA
2020	W	TST	0.931	LL10	NA
2021	S	KSC	2.4535	HH1	0
2021	S	KSC	2.4535	HH2	0
2021	S	KSC	2.4535	HH3	0
2021	S	KSC	2.4535	HH4	0
2021	S	KSC	2.4535	HH5	0
2021	S	KSC	2.4535	HH6	0
2021	S	KSC	2.4535	HH7	0
2021	S	KSC	2.4535	HH8	0
2021	S	KSC	2.4535	HH9	0
2021	S	KSC	2.4535	HH10	0
2021	S	KSC	2.1726	LH1	0
2021	S	KSC	2.1726	LH2	0
2021	S	KSC	2.1726	LH3	0
2021	S	KSC	2.1726	LH4	0
2021	S	KSC	2.1726	LH5	0
2021	S	KSC	2.1726	LH6	0
2021	S	KSC	2.1726	LH7	0
2021	S	KSC	2.1726	LH8	0
2021	S	KSC	2.1726	LH9	0
2021	S	KSC	2.1726	LH10	0
2021	S	KSC	1.8917	HM1	0
2021	S	KSC	1.8917	HM2	0
2021	S	KSC	1.8917	HM3	0
2021	S	KSC	1.8917	HM4	0
2021	S	KSC	1.8917	HM5	0
2021	S	KSC	1.8917	HM6	0
2021	S	KSC	1.8917	HM7	0
2021	S	KSC	1.8917	HM8	0
2021	S	KSC	1.8917	HM9	0
2021	S	KSC	1.8917	HM10	0
2021	S	KSC	1.6108	LM1	0
2021	S	KSC	1.6108	LM2	20.4082
2021	S	KSC	1.6108	LM3	8.16327
2021	S	KSC	1.6108	LM4	14.5833
2021	S	KSC	1.6108	LM5	0
2021	S	KSC	1.6108	LM6	0
2021	S	KSC	1.6108	LM7	0
2021	S	KSC	1.6108	LM8	36.1702
2021	S	KSC	1.6108	LM9	2.04082
2021	S	KSC	1.6108	LM10	2.04082
2021	S	KSC	1.3299	HL1	26.6667
2021	S	KSC	1.3299	HL2	38.2979
2021	S	KSC	1.3299	HL3	8.16327
2021	S	KSC	1.3299	HL4	26.5306
2021	S	KSC	1.3299	HL5	20.4082
2021	S	KSC	1.3299	HL6	35.4167
2021	S	KSC	1.3299	HL7	28.5714
2021	S	KSC	1.3299	HL8	19.1489
2021	S	KSC	1.3299	HL9	16.3265
2021	S	KSC	1.3299	HL10	24.4444
2021	S	KSC	1.049	LL1	22.449
2021	S	KSC	1.049	LL2	24.4898
2021	S	KSC	1.049	LL3	25
2021	S	KSC	1.049	LL4	23.4043
2021	S	KSC	1.049	LL5	38.2979
2021	S	KSC	1.049	LL6	40.4255
2021	S	KSC	1.049	LL7	39.5833
2021	S	KSC	1.049	LL8	18.75
2021	S	KSC	1.049	LL9	37.5
2021	S	KSC	1.049	LL10	28.8889
2021	S	PL	3.29	HH1	0
2021	S	PL	3.29	HH2	0
2021	S	PL	3.29	HH3	0
2021	S	PL	3.29	HH4	0
2021	S	PL	3.29	HH5	0
2021	S	PL	3.29	HH6	0
2021	S	PL	3.29	HH7	0
2021	S	PL	3.29	HH8	0
2021	S	PL	3.29	HH9	0
2021	S	PL	3.29	HH10	0
2021	S	PL	2.8265	LH1	0
2021	S	PL	2.8265	LH2	0
2021	S	PL	2.8265	LH3	0
2021	S	PL	2.8265	LH4	0
2021	S	PL	2.8265	LH5	0
2021	S	PL	2.8265	LH6	0
2021	S	PL	2.8265	LH7	0
2021	S	PL	2.8265	LH8	0
2021	S	PL	2.8265	LH9	0
2021	S	PL	2.8265	LH10	0
2021	S	PL	2.363	HM1	0
2021	S	PL	2.363	HM2	0
2021	S	PL	2.363	HM3	0
2021	S	PL	2.363	HM4	0
2021	S	PL	2.363	HM5	0
2021	S	PL	2.363	HM6	0
2021	S	PL	2.363	HM7	0
2021	S	PL	2.363	HM8	0
2021	S	PL	2.363	HM9	0
2021	S	PL	2.363	HM10	0
2021	S	PL	1.8995	LM1	0
2021	S	PL	1.8995	LM2	0
2021	S	PL	1.8995	LM3	0
2021	S	PL	1.8995	LM4	0
2021	S	PL	1.8995	LM5	0
2021	S	PL	1.8995	LM6	0
2021	S	PL	1.8995	LM7	0
2021	S	PL	1.8995	LM8	0
2021	S	PL	1.8995	LM9	0
2021	S	PL	1.8995	LM10	0
2021	S	PL	1.436	HL1	0
2021	S	PL	1.436	HL2	0
2021	S	PL	1.436	HL3	0
2021	S	PL	1.436	HL4	0
2021	S	PL	1.436	HL5	0
2021	S	PL	1.436	HL6	0
2021	S	PL	1.436	HL7	0
2021	S	PL	1.436	HL8	0
2021	S	PL	1.436	HL9	0
2021	S	PL	1.436	HL10	0
2021	S	PL	0.9725	LL1	0
2021	S	PL	0.9725	LL2	0
2021	S	PL	0.9725	LL3	0
2021	S	PL	0.9725	LL4	0
2021	S	PL	0.9725	LL5	0
2021	S	PL	0.9725	LL6	0
2021	S	PL	0.9725	LL7	0
2021	S	PL	0.9725	LL8	0
2021	S	PL	0.9725	LL9	0
2021	S	PL	0.9725	LL10	0
2021	S	PSW	2.6165	HH1	0
2021	S	PSW	2.6165	HH2	0
2021	S	PSW	2.6165	HH3	0
2021	S	PSW	2.6165	HH4	0
2021	S	PSW	2.6165	HH5	0
2021	S	PSW	2.6165	HH6	0
2021	S	PSW	2.6165	HH7	0
2021	S	PSW	2.6165	HH8	0
2021	S	PSW	2.6165	HH9	0
2021	S	PSW	2.6165	HH10	0
2021	S	PSW	2.2919	LH1	0
2021	S	PSW	2.2919	LH2	0
2021	S	PSW	2.2919	LH3	0
2021	S	PSW	2.2919	LH4	0
2021	S	PSW	2.2919	LH5	0
2021	S	PSW	2.2919	LH6	0
2021	S	PSW	2.2919	LH7	0
2021	S	PSW	2.2919	LH8	0
2021	S	PSW	2.2919	LH9	0
2021	S	PSW	2.2919	LH10	0
2021	S	PSW	1.9673	HM1	0
2021	S	PSW	1.9673	HM2	0
2021	S	PSW	1.9673	HM3	0
2021	S	PSW	1.9673	HM4	0
2021	S	PSW	1.9673	HM5	0
2021	S	PSW	1.9673	HM6	0
2021	S	PSW	1.9673	HM7	0
2021	S	PSW	1.9673	HM8	0
2021	S	PSW	1.9673	HM9	0
2021	S	PSW	1.9673	HM10	0
2021	S	PSW	1.6427	LM1	6.38298
2021	S	PSW	1.6427	LM2	2.12766
2021	S	PSW	1.6427	LM3	0
2021	S	PSW	1.6427	LM4	0
2021	S	PSW	1.6427	LM5	0
2021	S	PSW	1.6427	LM6	0
2021	S	PSW	1.6427	LM7	2.12766
2021	S	PSW	1.6427	LM8	0
2021	S	PSW	1.6427	LM9	0
2021	S	PSW	1.6427	LM10	10.4167
2021	S	PSW	1.3181	HL1	6.25
2021	S	PSW	1.3181	HL2	0
2021	S	PSW	1.3181	HL3	22.449
2021	S	PSW	1.3181	HL4	6.38298
2021	S	PSW	1.3181	HL5	22.9167
2021	S	PSW	1.3181	HL6	0
2021	S	PSW	1.3181	HL7	2.17391
2021	S	PSW	1.3181	HL8	0
2021	S	PSW	1.3181	HL9	2.08333
2021	S	PSW	1.3181	HL10	43.75
2021	S	PSW	0.9935	LL1	10.6383
2021	S	PSW	0.9935	LL2	27.0833
2021	S	PSW	0.9935	LL3	23.2558
2021	S	PSW	0.9935	LL4	19.1489
2021	S	PSW	0.9935	LL5	43.1818
2021	S	PSW	0.9935	LL6	0
2021	S	PSW	0.9935	LL7	21.7391
2021	S	PSW	0.9935	LL8	4.44444
2021	S	PSW	0.9935	LL9	8.69565
2021	S	PSW	0.9935	LL10	15.5556
2021	S	SW	3.966	HH1	0
2021	S	SW	3.966	HH2	0
2021	S	SW	3.966	HH3	0
2021	S	SW	3.966	HH4	0
2021	S	SW	3.966	HH5	0
2021	S	SW	3.966	HH6	0
2021	S	SW	3.966	HH7	0
2021	S	SW	3.966	HH8	0
2021	S	SW	3.966	HH9	0
2021	S	SW	3.966	HH10	0
2021	S	SW	3.3629	LH1	0
2021	S	SW	3.3629	LH2	0
2021	S	SW	3.3629	LH3	0
2021	S	SW	3.3629	LH4	0
2021	S	SW	3.3629	LH5	0
2021	S	SW	3.3629	LH6	0
2021	S	SW	3.3629	LH7	0
2021	S	SW	3.3629	LH8	0
2021	S	SW	3.3629	LH9	0
2021	S	SW	3.3629	LH10	0
2021	S	SW	2.7598	HM1	0
2021	S	SW	2.7598	HM2	0
2021	S	SW	2.7598	HM3	0
2021	S	SW	2.7598	HM4	0
2021	S	SW	2.7598	HM5	0
2021	S	SW	2.7598	HM6	0
2021	S	SW	2.7598	HM7	0
2021	S	SW	2.7598	HM8	0
2021	S	SW	2.7598	HM9	0
2021	S	SW	2.7598	HM10	0
2021	S	SW	2.1567	LM1	0
2021	S	SW	2.1567	LM2	0
2021	S	SW	2.1567	LM3	0
2021	S	SW	2.1567	LM4	0
2021	S	SW	2.1567	LM5	0
2021	S	SW	2.1567	LM6	0
2021	S	SW	2.1567	LM7	0
2021	S	SW	2.1567	LM8	0
2021	S	SW	2.1567	LM9	0
2021	S	SW	2.1567	LM10	0
2021	S	SW	1.5536	HL1	0
2021	S	SW	1.5536	HL2	0
2021	S	SW	1.5536	HL3	0
2021	S	SW	1.5536	HL4	0
2021	S	SW	1.5536	HL5	0
2021	S	SW	1.5536	HL6	0
2021	S	SW	1.5536	HL7	0
2021	S	SW	1.5536	HL8	0
2021	S	SW	1.5536	HL9	0
2021	S	SW	1.5536	HL10	0
2021	S	SW	0.9505	LL1	0
2021	S	SW	0.9505	LL2	0
2021	S	SW	0.9505	LL3	0
2021	S	SW	0.9505	LL4	0
2021	S	SW	0.9505	LL5	0
2021	S	SW	0.9505	LL6	0
2021	S	SW	0.9505	LL7	0
2021	S	SW	0.9505	LL8	0
2021	S	SW	0.9505	LL9	0
2021	S	SW	0.9505	LL10	0
2021	S	DI	2.902	HH1	0
2021	S	DI	2.902	HH2	0
2021	S	DI	2.902	HH3	0
2021	S	DI	2.902	HH4	0
2021	S	DI	2.902	HH5	0
2021	S	DI	2.902	HH6	0
2021	S	DI	2.902	HH7	0
2021	S	DI	2.902	HH8	0
2021	S	DI	2.902	HH9	0
2021	S	DI	2.902	HH10	0
2021	S	DI	2.5192	LH1	0
2021	S	DI	2.5192	LH2	0
2021	S	DI	2.5192	LH3	0
2021	S	DI	2.5192	LH4	0
2021	S	DI	2.5192	LH5	0
2021	S	DI	2.5192	LH6	0
2021	S	DI	2.5192	LH7	0
2021	S	DI	2.5192	LH8	0
2021	S	DI	2.5192	LH9	0
2021	S	DI	2.5192	LH10	0
2021	S	DI	2.1364	HM1	0
2021	S	DI	2.1364	HM2	0
2021	S	DI	2.1364	HM3	0
2021	S	DI	2.1364	HM4	0
2021	S	DI	2.1364	HM5	0
2021	S	DI	2.1364	HM6	0
2021	S	DI	2.1364	HM7	0
2021	S	DI	2.1364	HM8	0
2021	S	DI	2.1364	HM9	0
2021	S	DI	2.1364	HM10	0
2021	S	DI	1.7536	LM1	0
2021	S	DI	1.7536	LM2	2.04082
2021	S	DI	1.7536	LM3	0
2021	S	DI	1.7536	LM4	0
2021	S	DI	1.7536	LM5	0
2021	S	DI	1.7536	LM6	2.04082
2021	S	DI	1.7536	LM7	0
2021	S	DI	1.7536	LM8	0
2021	S	DI	1.7536	LM9	0
2021	S	DI	1.7536	LM10	0
2021	S	DI	1.3708	HL1	10.6383
2021	S	DI	1.3708	HL2	33.3333
2021	S	DI	1.3708	HL3	6.12245
2021	S	DI	1.3708	HL4	14.8936
2021	S	DI	1.3708	HL5	8.33333
2021	S	DI	1.3708	HL6	25
2021	S	DI	1.3708	HL7	18.75
2021	S	DI	1.3708	HL8	0
2021	S	DI	1.3708	HL9	0
2021	S	DI	1.3708	HL10	0
2021	S	DI	0.988	LL1	0
2021	S	DI	0.988	LL2	23.913
2021	S	DI	0.988	LL3	0
2021	S	DI	0.988	LL4	0
2021	S	DI	0.988	LL5	8.88889
2021	S	DI	0.988	LL6	10.8696
2021	S	DI	0.988	LL7	4.44444
2021	S	DI	0.988	LL8	2.12766
2021	S	DI	0.988	LL9	0
2021	S	DI	0.988	LL10	6.25
2021	S	HSM	2.576	HH1	0
2021	S	HSM	2.576	HH2	0
2021	S	HSM	2.576	HH3	0
2021	S	HSM	2.576	HH4	0
2021	S	HSM	2.576	HH5	0
2021	S	HSM	2.576	HH6	0
2021	S	HSM	2.576	HH7	0
2021	S	HSM	2.576	HH8	0
2021	S	HSM	2.576	HH9	0
2021	S	HSM	2.576	HH10	0
2021	S	HSM	2.2544	LH1	0
2021	S	HSM	2.2544	LH2	0
2021	S	HSM	2.2544	LH3	0
2021	S	HSM	2.2544	LH4	0
2021	S	HSM	2.2544	LH5	0
2021	S	HSM	2.2544	LH6	0
2021	S	HSM	2.2544	LH7	0
2021	S	HSM	2.2544	LH8	0
2021	S	HSM	2.2544	LH9	0
2021	S	HSM	2.2544	LH10	0
2021	S	HSM	1.9328	HM1	2.04082
2021	S	HSM	1.9328	HM2	0
2021	S	HSM	1.9328	HM3	0
2021	S	HSM	1.9328	HM4	0
2021	S	HSM	1.9328	HM5	0
2021	S	HSM	1.9328	HM6	0
2021	S	HSM	1.9328	HM7	0
2021	S	HSM	1.9328	HM8	0
2021	S	HSM	1.9328	HM9	0
2021	S	HSM	1.9328	HM10	0
2021	S	HSM	1.6112	LM1	6.12245
2021	S	HSM	1.6112	LM2	6.25
2021	S	HSM	1.6112	LM3	20.8333
2021	S	HSM	1.6112	LM4	12.2449
2021	S	HSM	1.6112	LM5	8.16327
2021	S	HSM	1.6112	LM6	14.2857
2021	S	HSM	1.6112	LM7	29.1667
2021	S	HSM	1.6112	LM8	28.5714
2021	S	HSM	1.6112	LM9	12.2449
2021	S	HSM	1.6112	LM10	12.5
2021	S	HSM	1.2896	HL1	26.5306
2021	S	HSM	1.2896	HL2	18.3673
2021	S	HSM	1.2896	HL3	4.16667
2021	S	HSM	1.2896	HL4	18.75
2021	S	HSM	1.2896	HL5	28.5714
2021	S	HSM	1.2896	HL6	48.9796
2021	S	HSM	1.2896	HL7	20.4082
2021	S	HSM	1.2896	HL8	16.3265
2021	S	HSM	1.2896	HL9	27.0833
2021	S	HSM	1.2896	HL10	31.25
2021	S	HSM	0.968	LL1	6.12245
2021	S	HSM	0.968	LL2	0
2021	S	HSM	0.968	LL3	2.04082
2021	S	HSM	0.968	LL4	8.33333
2021	S	HSM	0.968	LL5	0
2021	S	HSM	0.968	LL6	4.08163
2021	S	HSM	0.968	LL7	4.25532
2021	S	HSM	0.968	LL8	2.08333
2021	S	HSM	0.968	LL9	0
2021	S	HSM	0.968	LL10	10.6383
2021	S	KO	3.243	HH1	0
2021	S	KO	3.243	HH2	0
2021	S	KO	3.243	HH3	0
2021	S	KO	3.243	HH4	0
2021	S	KO	3.243	HH5	0
2021	S	KO	3.243	HH6	0
2021	S	KO	3.243	HH7	0
2021	S	KO	3.243	HH8	0
2021	S	KO	3.243	HH9	0
2021	S	KO	3.243	HH10	0
2021	S	KO	2.8258	LH1	0
2021	S	KO	2.8258	LH2	0
2021	S	KO	2.8258	LH3	0
2021	S	KO	2.8258	LH4	0
2021	S	KO	2.8258	LH5	0
2021	S	KO	2.8258	LH6	0
2021	S	KO	2.8258	LH7	0
2021	S	KO	2.8258	LH8	0
2021	S	KO	2.8258	LH9	0
2021	S	KO	2.8258	LH10	0
2021	S	KO	2.4086	HM1	0
2021	S	KO	2.4086	HM2	0
2021	S	KO	2.4086	HM3	0
2021	S	KO	2.4086	HM4	0
2021	S	KO	2.4086	HM5	0
2021	S	KO	2.4086	HM6	0
2021	S	KO	2.4086	HM7	0
2021	S	KO	2.4086	HM8	0
2021	S	KO	2.4086	HM9	0
2021	S	KO	2.4086	HM10	0
2021	S	KO	1.9914	LM1	2.08333
2021	S	KO	1.9914	LM2	0
2021	S	KO	1.9914	LM3	0
2021	S	KO	1.9914	LM4	0
2021	S	KO	1.9914	LM5	4.08163
2021	S	KO	1.9914	LM6	0
2021	S	KO	1.9914	LM7	0
2021	S	KO	1.9914	LM8	0
2021	S	KO	1.9914	LM9	0
2021	S	KO	1.9914	LM10	0
2021	S	KO	1.5742	HL1	4.16667
2021	S	KO	1.5742	HL2	0
2021	S	KO	1.5742	HL3	4.08163
2021	S	KO	1.5742	HL4	6.25
2021	S	KO	1.5742	HL5	2.08333
2021	S	KO	1.5742	HL6	4.08163
2021	S	KO	1.5742	HL7	10.4167
2021	S	KO	1.5742	HL8	0
2021	S	KO	1.5742	HL9	12.2449
2021	S	KO	1.5742	HL10	0
2021	S	KO	1.157	LL1	0
2021	S	KO	1.157	LL2	2.12766
2021	S	KO	1.157	LL3	0
2021	S	KO	1.157	LL4	0
2021	S	KO	1.157	LL5	0
2021	S	KO	1.157	LL6	2.04082
2021	S	KO	1.157	LL7	0
2021	S	KO	1.157	LL8	0
2021	S	KO	1.157	LL9	0
2021	S	KO	1.157	LL10	0
2021	S	YSA	3.0405	HH1	0
2021	S	YSA	3.0405	HH2	0
2021	S	YSA	3.0405	HH3	0
2021	S	YSA	3.0405	HH4	0
2021	S	YSA	3.0405	HH5	0
2021	S	YSA	3.0405	HH6	0
2021	S	YSA	3.0405	HH7	0
2021	S	YSA	3.0405	HH8	0
2021	S	YSA	3.0405	HH9	0
2021	S	YSA	3.0405	HH10	0
2021	S	YSA	2.646	LH1	0
2021	S	YSA	2.646	LH2	0
2021	S	YSA	2.646	LH3	0
2021	S	YSA	2.646	LH4	0
2021	S	YSA	2.646	LH5	0
2021	S	YSA	2.646	LH6	0
2021	S	YSA	2.646	LH7	0
2021	S	YSA	2.646	LH8	0
2021	S	YSA	2.646	LH9	0
2021	S	YSA	2.646	LH10	0
2021	S	YSA	2.2515	HM1	0
2021	S	YSA	2.2515	HM2	0
2021	S	YSA	2.2515	HM3	0
2021	S	YSA	2.2515	HM4	0
2021	S	YSA	2.2515	HM5	0
2021	S	YSA	2.2515	HM6	0
2021	S	YSA	2.2515	HM7	0
2021	S	YSA	2.2515	HM8	0
2021	S	YSA	2.2515	HM9	0
2021	S	YSA	2.2515	HM10	0
2021	S	YSA	1.857	LM1	4.08163
2021	S	YSA	1.857	LM2	22.449
2021	S	YSA	1.857	LM3	35.4167
2021	S	YSA	1.857	LM4	6.12245
2021	S	YSA	1.857	LM5	16.3265
2021	S	YSA	1.857	LM6	2.08333
2021	S	YSA	1.857	LM7	10.2041
2021	S	YSA	1.857	LM8	39.5833
2021	S	YSA	1.857	LM9	14.5833
2021	S	YSA	1.857	LM10	16.3265
2021	S	YSA	1.4625	HL1	14.5833
2021	S	YSA	1.4625	HL2	10.2041
2021	S	YSA	1.4625	HL3	39.5833
2021	S	YSA	1.4625	HL4	30.4348
2021	S	YSA	1.4625	HL5	17.3913
2021	S	YSA	1.4625	HL6	28.2609
2021	S	YSA	1.4625	HL7	21.2766
2021	S	YSA	1.4625	HL8	17.0213
2021	S	YSA	1.4625	HL9	2.22222
2021	S	YSA	1.4625	HL10	16.6667
2021	S	YSA	1.068	LL1	8.16327
2021	S	YSA	1.068	LL2	6.12245
2021	S	YSA	1.068	LL3	2.12766
2021	S	YSA	1.068	LL4	14.8936
2021	S	YSA	1.068	LL5	6.12245
2021	S	YSA	1.068	LL6	6.38298
2021	S	YSA	1.068	LL7	15.2174
2021	S	YSA	1.068	LL8	6.66667
2021	S	YSA	1.068	LL9	6.25
2021	S	YSA	1.068	LL10	6.38298
2021	S	LK	2.357	HH1	0
2021	S	LK	2.357	HH2	0
2021	S	LK	2.357	HH3	0
2021	S	LK	2.357	HH4	0
2021	S	LK	2.357	HH5	0
2021	S	LK	2.357	HH6	0
2021	S	LK	2.357	HH7	0
2021	S	LK	2.357	HH8	0
2021	S	LK	2.357	HH9	0
2021	S	LK	2.357	HH10	0
2021	S	LK	2.0776	LH1	0
2021	S	LK	2.0776	LH2	0
2021	S	LK	2.0776	LH3	0
2021	S	LK	2.0776	LH4	0
2021	S	LK	2.0776	LH5	0
2021	S	LK	2.0776	LH6	0
2021	S	LK	2.0776	LH7	0
2021	S	LK	2.0776	LH8	0
2021	S	LK	2.0776	LH9	0
2021	S	LK	2.0776	LH10	0
2021	S	LK	1.7982	HM1	0
2021	S	LK	1.7982	HM2	0
2021	S	LK	1.7982	HM3	0
2021	S	LK	1.7982	HM4	0
2021	S	LK	1.7982	HM5	0
2021	S	LK	1.7982	HM6	0
2021	S	LK	1.7982	HM7	0
2021	S	LK	1.7982	HM8	0
2021	S	LK	1.7982	HM9	4.25532
2021	S	LK	1.7982	HM10	0
2021	S	LK	1.5188	LM1	12.5
2021	S	LK	1.5188	LM2	6.12245
2021	S	LK	1.5188	LM3	2.04082
2021	S	LK	1.5188	LM4	8.16327
2021	S	LK	1.5188	LM5	34.6939
2021	S	LK	1.5188	LM6	8.16327
2021	S	LK	1.5188	LM7	20.4082
2021	S	LK	1.5188	LM8	14.5833
2021	S	LK	1.5188	LM9	4.08163
2021	S	LK	1.5188	LM10	13.0435
2021	S	LK	1.2394	HL1	36.1702
2021	S	LK	1.2394	HL2	22.449
2021	S	LK	1.2394	HL3	36.7347
2021	S	LK	1.2394	HL4	16.3265
2021	S	LK	1.2394	HL5	24.4898
2021	S	LK	1.2394	HL6	45.8333
2021	S	LK	1.2394	HL7	24.4898
2021	S	LK	1.2394	HL8	4.16667
2021	S	LK	1.2394	HL9	19.1489
2021	S	LK	1.2394	HL10	21.7391
2021	S	LK	0.96	LL1	28.5714
2021	S	LK	0.96	LL2	16.6667
2021	S	LK	0.96	LL3	22.9167
2021	S	LK	0.96	LL4	18.3673
2021	S	LK	0.96	LL5	8.51064
2021	S	LK	0.96	LL6	6.12245
2021	S	LK	0.96	LL7	0
2021	S	LK	0.96	LL8	4.34783
2021	S	LK	0.96	LL9	4.44444
2021	S	LK	0.96	LL10	2.08333
2021	S	LKT	2.6545	HH1	0
2021	S	LKT	2.6545	HH2	0
2021	S	LKT	2.6545	HH3	0
2021	S	LKT	2.6545	HH4	0
2021	S	LKT	2.6545	HH5	0
2021	S	LKT	2.6545	HH6	0
2021	S	LKT	2.6545	HH7	0
2021	S	LKT	2.6545	HH8	0
2021	S	LKT	2.6545	HH9	0
2021	S	LKT	2.6545	HH10	0
2021	S	LKT	2.3053	LH1	0
2021	S	LKT	2.3053	LH2	0
2021	S	LKT	2.3053	LH3	0
2021	S	LKT	2.3053	LH4	0
2021	S	LKT	2.3053	LH5	0
2021	S	LKT	2.3053	LH6	0
2021	S	LKT	2.3053	LH7	0
2021	S	LKT	2.3053	LH8	0
2021	S	LKT	2.3053	LH9	0
[truncated: 3,761 more rows]

## Sheet: LiDAR point cloud of remains 
ID	Latitude	Longitude	Altitude (mPD)
1	22.2457	114.247	3.12273
2	22.2457	114.247	3.08093
3	22.2457	114.247	3.12133
4	22.2457	114.247	3.09533
5	22.2457	114.247	3.11833
6	22.2457	114.247	3.11593
7	22.2457	114.247	3.07523
8	22.2457	114.247	3.10843
9	22.2457	114.247	3.07843
10	22.2457	114.247	3.09893
11	22.2457	114.247	3.08453
12	22.2457	114.247	3.12793
13	22.2457	114.247	3.08143
14	22.2457	114.247	3.09903
15	22.2457	114.247	3.13073
16	22.2457	114.247	3.11233
17	22.2457	114.247	3.13083
18	22.2457	114.247	3.12373
19	22.2457	114.247	3.09723
20	22.2457	114.247	3.05063
21	22.2457	114.247	3.07573
22	22.2457	114.247	3.02583
23	22.2457	114.247	3.11763
24	22.2457	114.247	3.06073
25	22.2457	114.247	3.07063
26	22.2457	114.247	3.07913
27	22.2457	114.247	3.14073
28	22.2457	114.247	3.00473
29	22.2457	114.247	3.10153
30	22.2457	114.247	3.10823
31	22.2457	114.247	3.03973
32	22.2457	114.247	3.10853
33	22.2457	114.247	3.10213
34	22.2457	114.247	3.13213
35	22.2457	114.247	3.02163
36	22.2457	114.247	3.03093
37	22.2457	114.247	3.13003
38	22.2457	114.247	3.04953
39	22.2457	114.247	3.07063
40	22.2457	114.247	3.03233
41	22.2457	114.247	3.09473
42	22.2457	114.247	3.01253
43	22.2457	114.247	3.02973
44	22.2457	114.247	3.12433
45	22.2457	114.247	3.10423
46	22.2457	114.247	3.05393
47	22.2457	114.247	3.01503
48	22.2457	114.247	2.85953
49	22.2457	114.247	3.06123
50	22.2457	114.247	3.11823
51	22.2457	114.247	3.10443
52	22.2457	114.247	3.10743
53	22.2457	114.247	2.92923
54	22.2457	114.247	3.06413
55	22.2457	114.247	3.03893
56	22.2457	114.247	3.08213
57	22.2457	114.247	3.04423
58	22.2457	114.247	3.04203
59	22.2457	114.247	2.95973
60	22.2457	114.247	2.91493
61	22.2457	114.247	2.87103
62	22.2457	114.247	3.04633
63	22.2457	114.247	3.11863
64	22.2457	114.247	3.08813
65	22.2457	114.247	3.08553
66	22.2457	114.247	3.09213
67	22.2457	114.247	3.07803
68	22.2457	114.247	3.06033
69	22.2457	114.247	2.90103
70	22.2457	114.247	3.00023
71	22.2457	114.247	3.09133
72	22.2457	114.247	3.00373
73	22.2457	114.247	3.08013
74	22.2457	114.247	3.04353
75	22.2457	114.247	3.08513
76	22.2457	114.247	3.00163
77	22.2457	114.247	3.04033
78	22.2457	114.247	3.10483
79	22.2457	114.247	3.13483
80	22.2457	114.247	3.11343
81	22.2457	114.247	2.86213
82	22.2457	114.247	3.10573
83	22.2457	114.247	2.86903
84	22.2457	114.247	3.12373
85	22.2457	114.247	3.03473
86	22.2457	114.247	3.13393
87	22.2457	114.247	3.09133
88	22.2457	114.247	3.08903
89	22.2457	114.247	3.11913
90	22.2457	114.247	3.04103
91	22.2457	114.247	3.05433
92	22.2457	114.247	3.11543
93	22.2457	114.247	2.88183
94	22.2457	114.247	3.09343
95	22.2457	114.247	3.10413
96	22.2457	114.247	2.98723
97	22.2457	114.247	3.02223
98	22.2457	114.247	3.05083
99	22.2457	114.247	2.95423
100	22.2457	114.247	3.02243
101	22.2457	114.247	3.10993
102	22.2457	114.247	3.02603
103	22.2457	114.247	2.99763
104	22.2457	114.247	2.92313
105	22.2457	114.247	3.08283
106	22.2457	114.247	2.89613
107	22.2457	114.247	3.06813
108	22.2457	114.247	3.00133
109	22.2457	114.247	3.10553
110	22.2457	114.247	2.87153
111	22.2457	114.247	2.85903
112	22.2457	114.247	2.98113
113	22.2457	114.247	3.11523
114	22.2457	114.247	3.02603
115	22.2457	114.247	2.99003
116	22.2457	114.247	3.09293
117	22.2457	114.247	2.85763
118	22.2457	114.247	2.87033
119	22.2457	114.247	2.98763
120	22.2457	114.247	3.05923
121	22.2457	114.247	2.89683
122	22.2457	114.247	3.14583
123	22.2457	114.247	3.08633
124	22.2457	114.247	3.14413
125	22.2457	114.247	3.05833
126	22.2457	114.247	2.91893
127	22.2457	114.247	2.92003
128	22.2457	114.247	3.04423
129	22.2457	114.247	3.05833
130	22.2457	114.247	3.06433
131	22.2457	114.247	3.13213
132	22.2457	114.247	2.99893
133	22.2457	114.247	2.87583
134	22.2457	114.247	3.09083
135	22.2457	114.247	2.85293
136	22.2457	114.247	3.09803
137	22.2457	114.247	3.11953
138	22.2457	114.247	3.06203
139	22.2457	114.247	2.92043
140	22.2457	114.247	3.02533
141	22.2457	114.247	3.09443
142	22.2457	114.247	3.06993
143	22.2457	114.247	3.03323
144	22.2457	114.247	2.86803
145	22.2457	114.247	2.95343
146	22.2457	114.247	3.05473
147	22.2457	114.247	3.00553
148	22.2457	114.247	2.92813
149	22.2457	114.247	3.09423
150	22.2457	114.247	2.86123
151	22.2457	114.247	2.87913
152	22.2457	114.247	2.90343
153	22.2457	114.247	2.89283
154	22.2457	114.247	2.87673
155	22.2457	114.247	3.01983
156	22.2457	114.247	3.04873
157	22.2457	114.247	3.09553
158	22.2457	114.247	2.87633
159	22.2457	114.247	2.88283
160	22.2457	114.247	2.87683
161	22.2457	114.247	2.86773
162	22.2457	114.247	3.03733
163	22.2457	114.247	3.06553
164	22.2457	114.247	2.90763
165	22.2457	114.247	2.93363
166	22.2457	114.247	2.88553
167	22.2457	114.247	2.90933
168	22.2457	114.247	2.98473
169	22.2457	114.247	3.08813
170	22.2457	114.247	2.86043
171	22.2457	114.247	3.06873
172	22.2457	114.247	2.86003
173	22.2457	114.247	2.92353
174	22.2457	114.247	3.05793
175	22.2457	114.247	3.03623
176	22.2457	114.247	3.07833
177	22.2457	114.247	3.00603
178	22.2457	114.247	2.92743
179	22.2457	114.247	2.89403
180	22.2457	114.247	2.87703
181	22.2457	114.247	3.01313
182	22.2457	114.247	3.08013
183	22.2457	114.247	3.11053
184	22.2457	114.247	2.95023
185	22.2457	114.247	2.91953
186	22.2457	114.247	3.07113
187	22.2457	114.247	3.00383
188	22.2457	114.247	2.86873
189	22.2457	114.247	3.11063
190	22.2457	114.247	3.08633
191	22.2457	114.247	2.90243
192	22.2457	114.247	3.07323
193	22.2457	114.247	2.92973
194	22.2457	114.247	3.04183
195	22.2457	114.247	3.05943
196	22.2457	114.247	3.12873
197	22.2457	114.247	3.00563
198	22.2457	114.247	2.97023
199	22.2457	114.247	2.90533
200	22.2457	114.247	3.11073
201	22.2457	114.247	2.87213
202	22.2457	114.247	3.05513
203	22.2457	114.247	2.91003
204	22.2457	114.247	3.09253
205	22.2457	114.247	3.05153
206	22.2457	114.247	3.05403
207	22.2457	114.247	3.13263
208	22.2457	114.247	2.95263
209	22.2457	114.247	3.06303
210	22.2457	114.247	3.05853
211	22.2457	114.247	2.85743
212	22.2457	114.247	3.03993
213	22.2457	114.247	3.09123
214	22.2457	114.247	2.85173
215	22.2457	114.247	3.08153
216	22.2457	114.247	3.13993
217	22.2457	114.247	2.95303
218	22.2457	114.247	2.85143
219	22.2457	114.247	2.99553
220	22.2457	114.247	3.12273
221	22.2457	114.247	3.10253
222	22.2457	114.247	3.06183
223	22.2457	114.247	3.00173
224	22.2457	114.247	2.87953
225	22.2457	114.247	3.08723
226	22.2457	114.247	3.08403
227	22.2457	114.247	2.88403
228	22.2457	114.247	3.10533
229	22.2457	114.247	2.86663
230	22.2457	114.247	3.06513
231	22.2457	114.247	3.11483
232	22.2457	114.247	2.98013
233	22.2457	114.247	3.09553
234	22.2457	114.247	3.09083
235	22.2457	114.247	2.90613
236	22.2457	114.247	3.05523
237	22.2457	114.247	2.92073
238	22.2457	114.247	3.10363
239	22.2457	114.247	2.85703
240	22.2457	114.247	2.88383
241	22.2457	114.247	3.05173
242	22.2457	114.247	3.10333
243	22.2457	114.247	2.87503
244	22.2457	114.247	3.10543
245	22.2457	114.247	3.08973
246	22.2457	114.247	2.89913
247	22.2457	114.247	3.12033
248	22.2457	114.247	3.08933
249	22.2457	114.247	2.87733
250	22.2457	114.247	3.06043
251	22.2457	114.247	3.03113
252	22.2457	114.247	3.00853
253	22.2457	114.247	3.08333
254	22.2457	114.247	2.85753
255	22.2457	114.247	3.08893
256	22.2457	114.247	3.10703
257	22.2457	114.247	3.06833
258	22.2457	114.247	2.95963
259	22.2457	114.247	3.09653
260	22.2457	114.247	3.11373
261	22.2457	114.247	2.87033
262	22.2457	114.247	3.10133
263	22.2457	114.247	3.08173
264	22.2457	114.247	2.86103
265	22.2457	114.247	2.90213
266	22.2457	114.247	2.98723
267	22.2457	114.247	3.10223
268	22.2457	114.247	3.10463
269	22.2457	114.247	3.01963
270	22.2457	114.247	2.88383
271	22.2457	114.247	3.10373
272	22.2457	114.247	3.09873
273	22.2457	114.247	2.85763
274	22.2457	114.247	2.85653
275	22.2457	114.247	2.86933
276	22.2457	114.247	3.11073
277	22.2457	114.247	3.10423
278	22.2457	114.247	2.94493
279	22.2457	114.247	2.86573
280	22.2457	114.247	2.90433
281	22.2457	114.247	3.09723
282	22.2457	114.247	3.08553
283	22.2457	114.247	3.05423
284	22.2457	114.247	2.90763
285	22.2457	114.247	2.99733
286	22.2457	114.247	2.91213
287	22.2457	114.247	3.09273
288	22.2457	114.247	2.86593
289	22.2457	114.247	3.10663
290	22.2457	114.247	3.00533
291	22.2457	114.247	2.96893
292	22.2457	114.247	3.10503
293	22.2457	114.247	2.89623
294	22.2457	114.247	2.87153
295	22.2457	114.247	3.01153
296	22.2457	114.247	2.85963
297	22.2457	114.247	3.09553
298	22.2457	114.247	3.01713
299	22.2457	114.247	2.98753
300	22.2457	114.247	3.02463
301	22.2457	114.247	2.85353
302	22.2457	114.247	2.98513
303	22.2457	114.247	2.85243
304	22.2457	114.247	2.86113
305	22.2457	114.247	2.85583
306	22.2457	114.247	3.01993
307	22.2457	114.247	3.01993
308	22.2457	114.247	3.04953
309	22.2457	114.247	2.97253
310	22.2457	114.247	3.00053
311	22.2457	114.247	3.07613
312	22.2457	114.247	3.00743
313	22.2457	114.247	3.01513
314	22.2457	114.247	3.10773
315	22.2457	114.247	2.95533
316	22.2457	114.247	3.08023
317	22.2457	114.247	3.09303
318	22.2457	114.247	2.84503
319	22.2457	114.247	2.89203
320	22.2457	114.247	2.92473
321	22.2457	114.247	2.97723
322	22.2457	114.247	3.04823
323	22.2457	114.247	2.88923
324	22.2457	114.247	3.03973
325	22.2457	114.247	2.87923
326	22.2457	114.247	3.01943
327	22.2457	114.247	2.85883
328	22.2457	114.247	3.05373
329	22.2457	114.247	2.86973
330	22.2457	114.247	2.88743
331	22.2457	114.247	3.06903
332	22.2457	114.247	3.10213
333	22.2457	114.247	3.11713
334	22.2457	114.247	3.07553
335	22.2457	114.247	3.00563
336	22.2457	114.247	3.11023
337	22.2457	114.247	2.95333
338	22.2457	114.247	3.04193
339	22.2457	114.247	3.07503
340	22.2457	114.247	3.10153
341	22.2457	114.247	2.86233
342	22.2457	114.247	3.01833
343	22.2457	114.247	2.95143
344	22.2457	114.247	2.85013
345	22.2457	114.247	3.07133
346	22.2457	114.247	2.95363
347	22.2457	114.247	2.99883
348	22.2457	114.247	2.85063
349	22.2457	114.247	2.96643
350	22.2457	114.247	3.03283
351	22.2457	114.247	3.07583
352	22.2457	114.247	3.11053
353	22.2457	114.247	2.93883
354	22.2457	114.247	3.09293
355	22.2457	114.247	2.99073
356	22.2457	114.247	2.87963
357	22.2457	114.247	2.86663
358	22.2457	114.247	2.92173
359	22.2457	114.247	2.85933
360	22.2457	114.247	2.84793
361	22.2457	114.247	3.03793
362	22.2457	114.247	3.11513
363	22.2457	114.247	3.09043
364	22.2457	114.247	2.89113
365	22.2457	114.247	3.00623
366	22.2457	114.247	3.08153
367	22.2457	114.247	2.86733
368	22.2457	114.247	3.08473
369	22.2457	114.247	2.91183
370	22.2457	114.247	2.85693
371	22.2457	114.247	2.86233
372	22.2457	114.247	3.07973
373	22.2457	114.247	2.89153
374	22.2457	114.247	2.87363
375	22.2457	114.247	2.86763
376	22.2457	114.247	3.06923
377	22.2457	114.247	3.07593
378	22.2457	114.247	2.93363
379	22.2457	114.247	3.05163
380	22.2457	114.247	2.84353
381	22.2457	114.247	2.93463
382	22.2457	114.247	2.89163
383	22.2457	114.247	2.93843
384	22.2457	114.247	3.07933
385	22.2457	114.247	2.93673
386	22.2457	114.247	3.08773
387	22.2457	114.247	3.00613
388	22.2457	114.247	2.97093
389	22.2457	114.247	2.98293
390	22.2457	114.247	2.93163
391	22.2457	114.247	2.85893
392	22.2457	114.247	3.06583
393	22.2457	114.247	2.87353
394	22.2457	114.247	3.12423
395	22.2457	114.247	3.10193
396	22.2457	114.247	2.89873
397	22.2457	114.247	2.95713
398	22.2457	114.247	3.13183
399	22.2457	114.247	2.90633
400	22.2457	114.247	2.85893
401	22.2457	114.247	3.09343
402	22.2457	114.247	2.93583
403	22.2457	114.247	2.86593
404	22.2457	114.247	2.82633
405	22.2457	114.247	2.94303
406	22.2457	114.247	2.85183
407	22.2457	114.247	3.05043
408	22.2457	114.247	2.92243
409	22.2457	114.247	3.07833
410	22.2457	114.247	2.89723
411	22.2457	114.247	3.09203
412	22.2457	114.247	2.90243
413	22.2457	114.247	3.07263
414	22.2457	114.247	3.00403
415	22.2457	114.247	3.02643
416	22.2457	114.247	2.89083
417	22.2457	114.247	2.89523
418	22.2457	114.247	3.02363
419	22.2457	114.247	2.85363
420	22.2457	114.247	2.87003
421	22.2457	114.247	3.08283
422	22.2457	114.247	2.84683
423	22.2457	114.247	2.97713
424	22.2457	114.247	3.14443
425	22.2457	114.247	2.94363
426	22.2457	114.247	2.89553
427	22.2457	114.247	2.89823
428	22.2457	114.247	2.92233
429	22.2457	114.247	2.87163
430	22.2457	114.247	2.84973
431	22.2457	114.247	2.85713
432	22.2457	114.247	2.86763
433	22.2457	114.247	3.13383
434	22.2457	114.247	2.85833
435	22.2457	114.247	2.90363
436	22.2457	114.247	2.89663
437	22.2457	114.247	3.05433
438	22.2457	114.247	2.91633
439	22.2457	114.247	3.09183
440	22.2457	114.247	2.97963
441	22.2457	114.247	3.07523
442	22.2457	114.247	3.00173
443	22.2457	114.247	2.95313
444	22.2457	114.247	3.05283
445	22.2457	114.247	3.08423
446	22.2457	114.247	3.04313
447	22.2457	114.247	2.86993
448	22.2457	114.247	2.86803
449	22.2457	114.247	3.04873
450	22.2457	114.247	2.87613
451	22.2457	114.247	2.90093
452	22.2457	114.247	2.86583
453	22.2457	114.247	3.08733
454	22.2457	114.247	3.06203
455	22.2457	114.247	3.02283
456	22.2457	114.247	2.89533
457	22.2457	114.247	2.88143
458	22.2457	114.247	2.97703
459	22.2457	114.247	2.95693
460	22.2457	114.247	2.95933
461	22.2457	114.247	3.14143
462	22.2457	114.247	3.03443
463	22.2457	114.247	2.93963
464	22.2457	114.247	2.92433
465	22.2457	114.247	2.87503
466	22.2457	114.247	2.86913
467	22.2457	114.247	3.04863
468	22.2457	114.247	2.94243
469	22.2457	114.247	2.84383
470	22.2457	114.247	3.00363
471	22.2457	114.247	3.06723
472	22.2457	114.247	2.84583
473	22.2457	114.247	3.03793
474	22.2457	114.247	2.89983
475	22.2457	114.247	3.06943
476	22.2457	114.247	3.05753
477	22.2457	114.247	3.08703
478	22.2457	114.247	3.06443
479	22.2457	114.247	2.86923
480	22.2457	114.247	2.86943
481	22.2457	114.247	2.88423
482	22.2457	114.247	2.90053
483	22.2457	114.247	2.88863
484	22.2457	114.247	3.01233
485	22.2457	114.247	3.06113
486	22.2457	114.247	2.88753
487	22.2457	114.247	3.11923
488	22.2457	114.247	3.04303
489	22.2457	114.247	2.87443
490	22.2457	114.247	2.83323
491	22.2457	114.247	2.91193
492	22.2457	114.247	3.09723
493	22.2457	114.247	2.89333
494	22.2457	114.247	2.97653
495	22.2457	114.247	3.09683
496	22.2457	114.247	3.01273
497	22.2457	114.247	3.07213
498	22.2457	114.247	2.93533
499	22.2457	114.247	2.85053
500	22.2457	114.247	2.90873
501	22.2457	114.247	2.89393
502	22.2457	114.247	3.00473
503	22.2457	114.247	3.09253
504	22.2457	114.247	2.98213
505	22.2457	114.247	3.09733
506	22.2457	114.247	2.85343
507	22.2457	114.247	2.86353
508	22.2457	114.247	2.87593
509	22.2457	114.247	3.03523
510	22.2457	114.247	2.89283
511	22.2457	114.247	2.85013
512	22.2457	114.247	2.89243
513	22.2457	114.247	3.04873
514	22.2457	114.247	2.96793
515	22.2457	114.247	2.84133
516	22.2457	114.247	2.87183
517	22.2457	114.247	3.02663
518	22.2457	114.247	2.85373
519	22.2457	114.247	2.89673
520	22.2457	114.247	2.92163
521	22.2457	114.247	3.06733
522	22.2457	114.247	3.04573
523	22.2457	114.247	3.10713
524	22.2457	114.247	2.91123
525	22.2457	114.247	3.03803
526	22.2457	114.247	2.93493
527	22.2457	114.247	2.89533
528	22.2457	114.247	2.85113
529	22.2457	114.247	3.07133
530	22.2457	114.247	3.05163
531	22.2457	114.247	2.88383
532	22.2457	114.247	2.92023
533	22.2457	114.247	2.85833
534	22.2457	114.247	2.90843
535	22.2457	114.247	2.93243
536	22.2457	114.247	3.06193
537	22.2457	114.247	2.97863
538	22.2457	114.247	2.90653
539	22.2457	114.247	2.90343
540	22.2457	114.247	2.99963
541	22.2457	114.247	2.88553
542	22.2457	114.247	2.88893
543	22.2457	114.247	2.89123
544	22.2457	114.247	2.88563
545	22.2457	114.247	3.04163
546	22.2457	114.247	3.05543
547	22.2457	114.247	3.13143
548	22.2457	114.247	3.04373
549	22.2457	114.247	2.99823
550	22.2457	114.247	2.97843
551	22.2457	114.247	2.88133
552	22.2457	114.247	3.05163
553	22.2457	114.247	2.89953
554	22.2457	114.247	2.87493
555	22.2457	114.247	2.83893
556	22.2457	114.247	2.85353
557	22.2457	114.247	3.00063
558	22.2457	114.247	2.92193
559	22.2457	114.247	3.06303
560	22.2457	114.247	2.96443
561	22.2457	114.247	3.07713
562	22.2457	114.247	2.91703
563	22.2457	114.247	2.86263
564	22.2457	114.247	2.88883
565	22.2457	114.247	2.90243
566	22.2457	114.247	2.91493
567	22.2457	114.247	2.89313
568	22.2457	114.247	3.07013
569	22.2457	114.247	3.04873
570	22.2457	114.247	2.95373
571	22.2457	114.247	2.90413
572	22.2457	114.247	3.02483
573	22.2457	114.247	2.89833
574	22.2457	114.247	2.85253
575	22.2457	114.247	3.05003
576	22.2457	114.247	2.88673
577	22.2457	114.247	3.00753
578	22.2457	114.247	2.92213
579	22.2457	114.247	2.87403
580	22.2457	114.247	2.90643
581	22.2457	114.247	3.04123
582	22.2457	114.247	3.03873
583	22.2457	114.247	2.91113
584	22.2457	114.247	3.04273
585	22.2457	114.247	2.89983
586	22.2457	114.247	2.97033
587	22.2457	114.247	2.89293
588	22.2457	114.247	2.94443
589	22.2457	114.247	2.87113
590	22.2457	114.247	2.89113
591	22.2457	114.247	3.01283
592	22.2457	114.247	3.01733
593	22.2457	114.247	2.88083
594	22.2457	114.247	2.85123
595	22.2457	114.247	3.03663
596	22.2457	114.247	2.86133
597	22.2457	114.247	2.93523
598	22.2457	114.247	3.06323
599	22.2457	114.247	2.82953
600	22.2457	114.247	2.85803
601	22.2457	114.247	3.05683
602	22.2457	114.247	2.89853
603	22.2457	114.247	3.03363
604	22.2457	114.247	3.04513
605	22.2457	114.247	2.89023
606	22.2457	114.247	2.91163
607	22.2457	114.247	3.07753
608	22.2457	114.247	2.90603
609	22.2457	114.247	2.84033
610	22.2457	114.247	2.84913
611	22.2457	114.247	2.92953
612	22.2457	114.247	2.91123
613	22.2457	114.247	2.94773
614	22.2457	114.247	3.02593
615	22.2457	114.247	2.98213
616	22.2457	114.247	2.90213
617	22.2457	114.247	3.04163
618	22.2457	114.247	2.86573
619	22.2457	114.247	3.08183
620	22.2457	114.247	3.08133
621	22.2457	114.247	2.87403
622	22.2457	114.247	2.88003
623	22.2457	114.247	3.03413
624	22.2457	114.247	3.08023
625	22.2457	114.247	3.06783
626	22.2457	114.247	2.92033
627	22.2457	114.247	3.05653
628	22.2457	114.247	3.05943
629	22.2457	114.247	2.85933
630	22.2457	114.247	2.96733
631	22.2457	114.247	2.93383
632	22.2457	114.247	3.03453
633	22.2457	114.247	2.95853
634	22.2457	114.247	3.06663
635	22.2457	114.247	2.90543
636	22.2457	114.247	3.04223
637	22.2457	114.247	2.86103
638	22.2457	114.247	2.91643
639	22.2457	114.247	3.00723
640	22.2457	114.247	3.08933
641	22.2457	114.247	2.95483
642	22.2457	114.247	2.89453
643	22.2457	114.247	2.90243
644	22.2457	114.247	2.94323
645	22.2457	114.247	2.89433
646	22.2457	114.247	2.99593
647	22.2457	114.247	3.14623
648	22.2457	114.247	2.87863
649	22.2457	114.247	3.03323
650	22.2457	114.247	2.85823
651	22.2457	114.247	2.88943
652	22.2457	114.247	3.06923
653	22.2457	114.247	2.86633
654	22.2457	114.247	2.88003
655	22.2457	114.247	3.03893
656	22.2457	114.247	2.87553
657	22.2457	114.247	3.06203
658	22.2457	114.247	2.90173
659	22.2457	114.247	3.06963
660	22.2457	114.247	2.97183
661	22.2457	114.247	2.92813
662	22.2457	114.247	3.00853
663	22.2457	114.247	2.88083
664	22.2457	114.247	2.84293
665	22.2457	114.247	3.08873
666	22.2457	114.247	2.86453
667	22.2457	114.247	2.91553
668	22.2457	114.247	3.04323
669	22.2457	114.247	3.01043
670	22.2457	114.247	2.86643
671	22.2457	114.247	2.83483
672	22.2457	114.247	2.84793
673	22.2457	114.247	2.96333
674	22.2457	114.247	2.88283
675	22.2457	114.247	2.91503
676	22.2457	114.247	2.90513
677	22.2457	114.247	2.85713
678	22.2457	114.247	2.88553
679	22.2457	114.247	2.93653
680	22.2457	114.247	3.07203
681	22.2457	114.247	2.93563
682	22.2457	114.247	2.91123
683	22.2457	114.247	2.86573
684	22.2457	114.247	3.05453
685	22.2457	114.247	2.99953
686	22.2457	114.247	2.91493
687	22.2457	114.247	2.86633
688	22.2457	114.247	2.99213
689	22.2457	114.247	3.05183
690	22.2457	114.247	2.85213
691	22.2457	114.247	2.87253
692	22.2457	114.247	3.07673
693	22.2457	114.247	2.99143
694	22.2457	114.247	3.04363
695	22.2457	114.247	2.91603
696	22.2457	114.247	3.06313
697	22.2457	114.247	2.85473
698	22.2457	114.247	2.86493
699	22.2457	114.247	3.02813
700	22.2457	114.247	3.02453
701	22.2457	114.247	2.92943
702	22.2457	114.247	2.85113
703	22.2457	114.247	3.04913
704	22.2457	114.247	2.86793
705	22.2457	114.247	3.02903
706	22.2457	114.247	3.01653
707	22.2457	114.247	2.86223
708	22.2457	114.247	2.86543
709	22.2457	114.247	2.91293
710	22.2457	114.247	2.98583
711	22.2457	114.247	2.87563
712	22.2457	114.247	2.84453
713	22.2457	114.247	2.85263
714	22.2457	114.247	3.03133
715	22.2457	114.247	2.91353
716	22.2457	114.247	2.89933
717	22.2457	114.247	2.87153
718	22.2457	114.247	3.00353
719	22.2457	114.247	2.87593
720	22.2457	114.247	2.87163
721	22.2457	114.247	3.02483
722	22.2457	114.247	2.99453
723	22.2457	114.247	2.95813
724	22.2457	114.247	2.89513
725	22.2457	114.247	2.87613
726	22.2457	114.247	2.95203
727	22.2457	114.247	2.89063
728	22.2457	114.247	2.87013
729	22.2457	114.247	2.88043
730	22.2457	114.247	3.02743
731	22.2457	114.247	2.98333
732	22.2457	114.247	2.91423
733	22.2457	114.247	2.90173
734	22.2457	114.247	2.87483
735	22.2457	114.247	2.85803
736	22.2457	114.247	3.07593
737	22.2457	114.247	2.87513
738	22.2457	114.247	2.98843
739	22.2457	114.247	2.88823
740	22.2457	114.247	2.85253
741	22.2457	114.247	2.85063
742	22.2457	114.247	2.87873
743	22.2457	114.247	2.87213
744	22.2457	114.247	2.85453
745	22.2457	114.247	2.92533
746	22.2457	114.247	2.85203
747	22.2457	114.247	2.89823
748	22.2457	114.247	2.92303
749	22.2457	114.247	2.84513
750	22.2457	114.247	2.86363
751	22.2457	114.247	2.96923
752	22.2457	114.247	2.95863
753	22.2457	114.247	2.86293
754	22.2457	114.247	2.85203
755	22.2457	114.247	2.90143
756	22.2457	114.247	3.03073
757	22.2457	114.247	3.02673
758	22.2457	114.247	2.90033
759	22.2457	114.247	2.85903
760	22.2457	114.247	2.87193
761	22.2457	114.247	2.89913
762	22.2457	114.247	2.85983
763	22.2457	114.247	2.95223
764	22.2457	114.247	3.02083
765	22.2457	114.247	2.84683
766	22.2457	114.247	3.02753
767	22.2457	114.247	2.92803
768	22.2457	114.247	2.99303
769	22.2457	114.247	3.05273
770	22.2457	114.247	2.88213
771	22.2457	114.247	3.06123
772	22.2457	114.247	3.00333
773	22.2457	114.247	2.87113
774	22.2457	114.247	3.06373
775	22.2457	114.247	2.86053
776	22.2457	114.247	2.85733
777	22.2457	114.247	2.86303
778	22.2457	114.247	2.84513
779	22.2457	114.247	2.88853
780	22.2457	114.247	2.90623
781	22.2457	114.247	2.86483
782	22.2457	114.247	2.89443
783	22.2457	114.247	2.85673
784	22.2457	114.247	3.02033
785	22.2457	114.247	2.88723
786	22.2457	114.247	2.87863
787	22.2457	114.247	2.88373
788	22.2457	114.247	3.00273
789	22.2457	114.247	2.84263
790	22.2457	114.247	2.85993
791	22.2457	114.247	3.05033
792	22.2457	114.247	2.87063
793	22.2457	114.247	2.88933
794	22.2457	114.247	2.93593
795	22.2457	114.247	3.04483
796	22.2457	114.247	2.86813
797	22.2457	114.247	3.01153
798	22.2457	114.247	3.09423
799	22.2457	114.247	3.14793
800	22.2457	114.247	3.04553
801	22.2457	114.247	3.03873
802	22.2457	114.247	2.93923
803	22.2457	114.247	2.85423
804	22.2457	114.247	3.04903
805	22.2457	114.247	2.89373
806	22.2457	114.247	2.87253
807	22.2457	114.247	3.08503
808	22.2457	114.247	2.88293
809	22.2457	114.247	2.90393
810	22.2457	114.247	2.86853
811	22.2457	114.247	3.00263
812	22.2457	114.247	2.86143
813	22.2457	114.247	2.93843
814	22.2457	114.247	2.92873
815	22.2457	114.247	2.91833
816	22.2457	114.247	2.97933
817	22.2457	114.247	3.05073
818	22.2457	114.247	2.88963
819	22.2457	114.247	2.90503
820	22.2457	114.247	2.86573
821	22.2457	114.247	2.92533
822	22.2457	114.247	2.93783
823	22.2457	114.247	2.92443
824	22.2457	114.247	3.07013
825	22.2457	114.247	2.91443
826	22.2457	114.247	2.88013
827	22.2457	114.247	2.92163
828	22.2457	114.247	3.06193
829	22.2457	114.247	3.02513
830	22.2457	114.247	3.01463
831	22.2457	114.247	2.89543
832	22.2457	114.247	3.07063
833	22.2457	114.247	2.99363
834	22.2457	114.247	2.90093
835	22.2457	114.247	2.85883
836	22.2457	114.247	2.83373
837	22.2457	114.247	3.08993
838	22.2457	114.247	2.87623
839	22.2457	114.247	2.85873
840	22.2457	114.247	2.84373
841	22.2457	114.247	2.96963
842	22.2457	114.247	3.07603
843	22.2457	114.247	3.00203
844	22.2457	114.247	2.82453
845	22.2457	114.247	2.89653
846	22.2457	114.247	2.89593
847	22.2457	114.247	3.04093
848	22.2457	114.247	3.01203
849	22.2457	114.247	2.86183
850	22.2457	114.247	3.01323
851	22.2457	114.247	3.03803
852	22.2457	114.247	2.95063
853	22.2457	114.247	2.92093
854	22.2457	114.247	2.98523
855	22.2457	114.247	2.86883
856	22.2457	114.247	2.96833
857	22.2457	114.247	2.88793
858	22.2457	114.247	2.88293
859	22.2457	114.247	3.07103
860	22.2457	114.247	3.08003
861	22.2457	114.247	2.84673
862	22.2457	114.247	3.09453
863	22.2457	114.247	2.86053
864	22.2457	114.247	2.97493
865	22.2457	114.247	2.86503
866	22.2457	114.247	2.90003
867	22.2457	114.247	2.85603
868	22.2457	114.247	2.87323
869	22.2457	114.247	3.03513
870	22.2457	114.247	2.92163
871	22.2457	114.247	2.96793
872	22.2457	114.247	2.88803
873	22.2457	114.247	3.05713
874	22.2457	114.247	3.03603
875	22.2457	114.247	2.85103
876	22.2457	114.247	2.88133
877	22.2457	114.247	2.85293
878	22.2457	114.247	2.86223
879	22.2457	114.247	2.89853
880	22.2457	114.247	2.84133
881	22.2457	114.247	2.96143
882	22.2457	114.247	2.91513
883	22.2457	114.247	2.86463
884	22.2457	114.247	2.86333
885	22.2457	114.247	2.84953
886	22.2457	114.247	2.96133
887	22.2457	114.247	3.07763
888	22.2457	114.247	2.86983
889	22.2457	114.247	2.85393
890	22.2457	114.247	2.91933
891	22.2457	114.247	3.09663
892	22.2457	114.247	2.88793
893	22.2457	114.247	2.86693
894	22.2457	114.247	2.92213
895	22.2457	114.247	2.84893
896	22.2457	114.247	3.03113
897	22.2457	114.247	2.96703
898	22.2457	114.247	2.98183
899	22.2457	114.247	2.90003
900	22.2457	114.247	3.04573
901	22.2457	114.247	2.85693
902	22.2457	114.247	3.05463
903	22.2457	114.247	2.87153
904	22.2457	114.247	2.85153
905	22.2457	114.247	3.12813
906	22.2457	114.247	3.05313
907	22.2457	114.247	2.88733
908	22.2457	114.247	3.09143
909	22.2457	114.247	2.83523
910	22.2457	114.247	2.85613
911	22.2457	114.247	2.84543
912	22.2457	114.247	2.96043
913	22.2457	114.247	2.87443
914	22.2457	114.247	3.02243
915	22.2457	114.247	2.89613
916	22.2457	114.247	2.90813
917	22.2457	114.247	3.05203
918	22.2457	114.247	3.14763
919	22.2457	114.247	3.07013
920	22.2457	114.247	3.06723
921	22.2457	114.247	2.92663
922	22.2457	114.247	2.91243
923	22.2457	114.247	2.85993
924	22.2457	114.247	2.86083
925	22.2457	114.247	2.92863
926	22.2457	114.247	2.86153
927	22.2457	114.247	2.97793
928	22.2457	114.247	2.82693
929	22.2457	114.247	2.91473
930	22.2457	114.247	2.85833
931	22.2457	114.247	2.97913
932	22.2457	114.247	2.99133
933	22.2457	114.247	2.88923
934	22.2457	114.247	2.93433
935	22.2457	114.247	3.03203
936	22.2457	114.247	3.08133
937	22.2457	114.247	2.94153
938	22.2457	114.247	2.91653
939	22.2457	114.247	2.93563
940	22.2457	114.247	2.90933
941	22.2457	114.247	2.85173
942	22.2457	114.247	3.07323
943	22.2457	114.247	2.84053
944	22.2457	114.247	2.86713
945	22.2457	114.247	2.86763
946	22.2457	114.247	3.07873
947	22.2457	114.247	2.99153
948	22.2457	114.247	3.04183
949	22.2457	114.247	2.99833
950	22.2457	114.247	3.00863
951	22.2457	114.247	2.87713
952	22.2457	114.247	2.84373
953	22.2457	114.247	3.08213
954	22.2457	114.247	2.92143
955	22.2457	114.247	2.99623
956	22.2457	114.247	3.04653
957	22.2457	114.247	3.07043
958	22.2457	114.247	2.96423
959	22.2457	114.247	2.87053
960	22.2457	114.247	3.02683
961	22.2457	114.247	2.86753
962	22.2457	114.247	3.03473
963	22.2457	114.247	3.02113
964	22.2457	114.247	2.85803
965	22.2457	114.247	2.89263
966	22.2457	114.247	2.97403
967	22.2457	114.247	2.85783
968	22.2457	114.247	3.04783
969	22.2457	114.247	2.99523
970	22.2457	114.247	2.95943
971	22.2457	114.247	2.85393
972	22.2457	114.247	2.87173
973	22.2457	114.247	3.06613
974	22.2457	114.247	3.06803
975	22.2457	114.247	2.85583
976	22.2457	114.247	2.96803
977	22.2457	114.247	2.85113
978	22.2457	114.247	2.88073
979	22.2457	114.247	2.86143
980	22.2457	114.247	3.02743
981	22.2457	114.247	2.95823
982	22.2457	114.247	2.88773
983	22.2457	114.247	2.85853
984	22.2457	114.247	2.96763
985	22.2457	114.247	2.99013
986	22.2457	114.247	2.94193
987	22.2457	114.247	3.04363
988	22.2457	114.247	2.87613
989	22.2457	114.247	2.88543
990	22.2457	114.247	2.87683
991	22.2457	114.247	3.07333
992	22.2457	114.247	3.04813
993	22.2457	114.247	2.84193
994	22.2457	114.247	2.88503
995	22.2457	114.247	2.85113
996	22.2457	114.247	2.86353
997	22.2457	114.247	2.99593
998	22.2457	114.247	2.89013
999	22.2457	114.247	2.85773
1000	22.2457	114.247	2.90653
1001	22.2457	114.247	3.04523
1002	22.2457	114.247	3.07963
1003	22.2457	114.247	3.02403
1004	22.2457	114.247	3.05363
1005	22.2457	114.247	2.85613
1006	22.2457	114.247	3.06083
1007	22.2457	114.247	2.86753
1008	22.2457	114.247	2.92123
1009	22.2457	114.247	3.03933
1010	22.2457	114.247	2.96923
1011	22.2457	114.247	3.01933
1012	22.2457	114.247	3.02293
1013	22.2457	114.247	3.03603
1014	22.2457	114.247	2.86503
1015	22.2457	114.247	3.01623
1016	22.2457	114.247	2.93243
1017	22.2457	114.247	3.07963
1018	22.2457	114.247	2.98033
1019	22.2457	114.247	2.88993
1020	22.2457	114.247	2.91453
1021	22.2457	114.247	2.89303
1022	22.2457	114.247	3.04783
1023	22.2457	114.247	2.95733
1024	22.2457	114.247	2.86103
1025	22.2457	114.247	3.04443
1026	22.2457	114.247	3.07753
1027	22.2457	114.247	2.86063
1028	22.2457	114.247	3.04493
1029	22.2457	114.247	2.97873
1030	22.2457	114.247	2.86133
1031	22.2457	114.247	2.93163
1032	22.2457	114.247	2.98083
1033	22.2457	114.247	3.04553
1034	22.2457	114.247	2.87913
1035	22.2457	114.247	3.09223
1036	22.2457	114.247	2.99083
1037	22.2457	114.247	3.05943
1038	22.2457	114.247	2.83873
1039	22.2457	114.247	2.94543
1040	22.2457	114.247	2.91073
1041	22.2457	114.247	2.93863
1042	22.2457	114.247	2.90393
1043	22.2457	114.247	3.08213
1044	22.2457	114.247	2.88843
1045	22.2457	114.247	2.85473
1046	22.2457	114.247	3.04673
1047	22.2457	114.247	2.85473
1048	22.2457	114.247	2.96273
1049	22.2457	114.247	2.86253
1050	22.2457	114.247	3.04683
1051	22.2457	114.247	2.89003
1052	22.2457	114.247	2.88623
1053	22.2457	114.247	3.04193
1054	22.2457	114.247	2.89433
1055	22.2457	114.247	2.88183
1056	22.2457	114.247	3.07963
1057	22.2457	114.247	3.16863
1058	22.2457	114.247	3.09983
1059	22.2457	114.247	2.85913
1060	22.2457	114.247	2.88573
1061	22.2457	114.247	3.01173
1062	22.2457	114.247	3.06273
1063	22.2457	114.247	2.99293
1064	22.2457	114.247	2.93153
1065	22.2457	114.247	2.88523
1066	22.2457	114.247	3.04773
1067	22.2457	114.247	2.97903
1068	22.2457	114.247	2.94623
1069	22.2457	114.247	3.02853
1070	22.2457	114.247	3.03513
1071	22.2457	114.247	3.08503
1072	22.2457	114.247	2.94693
1073	22.2457	114.247	2.94623
1074	22.2457	114.247	3.00893
1075	22.2457	114.247	2.91193
1076	22.2457	114.247	2.93243
1077	22.2457	114.247	2.97173
1078	22.2457	114.247	2.85643
1079	22.2457	114.247	2.93283
1080	22.2457	114.247	2.88833
1081	22.2457	114.247	3.11163
1082	22.2457	114.247	3.05093
1083	22.2457	114.247	3.03963
1084	22.2457	114.247	3.03983
1085	22.2457	114.247	2.88203
1086	22.2457	114.247	2.96453
1087	22.2457	114.247	3.04193
1088	22.2457	114.247	3.00413
1089	22.2457	114.247	3.03483
1090	22.2457	114.247	3.00833
1091	22.2457	114.247	2.90063
1092	22.2457	114.247	2.97093
1093	22.2457	114.247	2.90703
1094	22.2457	114.247	3.01933
1095	22.2457	114.247	2.96103
1096	22.2457	114.247	2.84123
1097	22.2457	114.247	3.02623
1098	22.2457	114.247	3.05663
1099	22.2457	114.247	2.98873
1100	22.2457	114.247	2.97963
1101	22.2457	114.247	3.04873
1102	22.2457	114.247	3.04723
1103	22.2457	114.247	3.02783
1104	22.2457	114.247	2.88083
1105	22.2457	114.247	3.06033
1106	22.2457	114.247	3.04583
1107	22.2457	114.247	2.89093
1108	22.2457	114.247	3.00553
1109	22.2457	114.247	2.90253
1110	22.2457	114.247	3.04633
1111	22.2457	114.247	2.88693
1112	22.2457	114.247	3.03173
1113	22.2457	114.247	2.97963
1114	22.2457	114.247	2.94093
1115	22.2457	114.247	2.85913
1116	22.2457	114.247	2.86673
1117	22.2457	114.247	2.99073
1118	22.2457	114.247	3.04553
1119	22.2457	114.247	3.01323
1120	22.2457	114.247	2.92683
1121	22.2457	114.247	2.96253
1122	22.2457	114.247	2.98763
1123	22.2457	114.247	2.85343
1124	22.2457	114.247	2.86323
1125	22.2457	114.247	2.83373
1126	22.2457	114.247	2.98313
1127	22.2457	114.247	2.88293
1128	22.2457	114.247	3.02363
1129	22.2457	114.247	2.92023
1130	22.2457	114.247	3.16073
1131	22.2457	114.247	2.85533
1132	22.2457	114.247	2.91193
1133	22.2457	114.247	2.92213
1134	22.2457	114.247	2.95673
1135	22.2457	114.247	2.91703
1136	22.2457	114.247	2.86743
1137	22.2457	114.247	2.86913
1138	22.2457	114.247	2.95413
1139	22.2457	114.247	3.02423
1140	22.2457	114.247	3.00753
1141	22.2457	114.247	2.92063
1142	22.2457	114.247	2.85143
1143	22.2457	114.247	2.87653
1144	22.2457	114.247	2.93663
1145	22.2457	114.247	2.97863
1146	22.2457	114.247	3.00483
1147	22.2457	114.247	2.88963
1148	22.2457	114.247	2.96523
1149	22.2457	114.247	2.91843
1150	22.2457	114.247	3.05263
1151	22.2457	114.247	2.98533
1152	22.2457	114.247	2.89593
1153	22.2457	114.247	2.91563
1154	22.2457	114.247	2.93733
1155	22.2457	114.247	2.99763
1156	22.2457	114.247	2.86493
1157	22.2457	114.247	2.90143
1158	22.2457	114.247	3.03653
1159	22.2457	114.247	2.98763
1160	22.2457	114.247	2.98633
1161	22.2457	114.247	2.95683
1162	22.2457	114.247	3.00083
1163	22.2457	114.247	2.90743
1164	22.2457	114.247	2.90243
1165	22.2457	114.247	2.89303
1166	22.2457	114.247	3.03183
1167	22.2457	114.247	3.01343
1168	22.2457	114.247	2.97423
1169	22.2457	114.247	2.94383
1170	22.2457	114.247	3.03453
1171	22.2457	114.247	3.01803
1172	22.2457	114.247	3.04343
1173	22.2457	114.247	2.96833
1174	22.2457	114.247	2.97333
1175	22.2457	114.247	2.85013
1176	22.2457	114.247	2.92863
1177	22.2457	114.247	3.06783
1178	22.2457	114.247	3.08543
1179	22.2457	114.247	2.89313
1180	22.2457	114.247	2.88273
1181	22.2457	114.247	3.07923
1182	22.2457	114.247	2.94393
1183	22.2457	114.247	2.88153
1184	22.2457	114.247	2.91363
1185	22.2457	114.247	3.05823
1186	22.2457	114.247	3.05173
1187	22.2457	114.247	2.83723
1188	22.2457	114.247	3.08953
1189	22.2457	114.247	2.88453
1190	22.2457	114.247	3.04213
1191	22.2457	114.247	3.01453
1192	22.2457	114.247	2.89273
1193	22.2457	114.247	3.00263
1194	22.2457	114.247	2.91773
1195	22.2457	114.247	2.85713
1196	22.2457	114.247	2.85463
1197	22.2457	114.247	2.86863
1198	22.2457	114.247	3.03533
1199	22.2457	114.247	2.89803
1200	22.2457	114.247	3.03733
1201	22.2457	114.247	3.05753
1202	22.2457	114.247	3.09493
1203	22.2457	114.247	3.01613
1204	22.2457	114.247	3.02703
1205	22.2457	114.247	2.89683
1206	22.2457	114.247	3.04363
1207	22.2457	114.247	3.04793
1208	22.2457	114.247	2.86333
1209	22.2457	114.247	2.95353
1210	22.2457	114.247	2.93923
1211	22.2457	114.247	3.04123
1212	22.2457	114.247	3.04113
1213	22.2457	114.247	2.92763
1214	22.2457	114.247	2.85563
1215	22.2457	114.247	3.04603
1216	22.2457	114.247	2.91573
1217	22.2457	114.247	2.90443
1218	22.2457	114.247	2.85263
1219	22.2457	114.247	2.99643
1220	22.2457	114.247	3.09833
1221	22.2457	114.247	3.15463
1222	22.2457	114.247	3.00563
1223	22.2457	114.247	3.02963
1224	22.2457	114.247	2.92373
1225	22.2457	114.247	2.91103
1226	22.2457	114.247	3.06133
1227	22.2457	114.247	3.06433
1228	22.2457	114.247	2.85663
1229	22.2457	114.247	2.91453
1230	22.2457	114.247	3.05193
1231	22.2457	114.247	2.89283
1232	22.2457	114.247	2.85383
1233	22.2457	114.247	2.91753
1234	22.2457	114.247	3.02303
1235	22.2457	114.247	3.02113
1236	22.2457	114.247	2.94153
1237	22.2457	114.247	3.04473
1238	22.2457	114.247	2.92883
1239	22.2457	114.247	3.02043
1240	22.2457	114.247	3.03613
1241	22.2457	114.247	2.97613
1242	22.2457	114.247	2.96833
1243	22.2457	114.247	2.88103
1244	22.2457	114.247	2.94023
1245	22.2457	114.247	3.00663
1246	22.2457	114.247	2.90533
1247	22.2457	114.247	2.99133
1248	22.2457	114.247	3.04953
1249	22.2457	114.247	2.87653
1250	22.2457	114.247	2.99503
1251	22.2457	114.247	3.05863
1252	22.2457	114.247	2.96393
1253	22.2457	114.247	2.83033
1254	22.2457	114.247	2.99503
1255	22.2457	114.247	2.93033
1256	22.2457	114.247	2.96743
1257	22.2457	114.247	2.99733
1258	22.2457	114.247	3.04503
1259	22.2457	114.247	2.90843
1260	22.2457	114.247	2.90323
1261	22.2457	114.247	2.86363
1262	22.2457	114.247	3.04123
1263	22.2457	114.247	3.01263
1264	22.2457	114.247	3.07283
1265	22.2457	114.247	3.02403
1266	22.2457	114.247	2.82913
1267	22.2457	114.247	2.94103
1268	22.2457	114.247	2.98373
1269	22.2457	114.247	2.90423
1270	22.2457	114.247	2.86013
1271	22.2457	114.247	3.03223
1272	22.2457	114.247	2.87893
1273	22.2457	114.247	2.95233
1274	22.2457	114.247	2.99663
1275	22.2457	114.247	2.89593
1276	22.2457	114.247	3.06303
1277	22.2457	114.247	2.95173
1278	22.2457	114.247	2.85183
1279	22.2457	114.247	3.03143
1280	22.2457	114.247	2.95513
1281	22.2457	114.247	2.97083
1282	22.2457	114.247	2.85333
1283	22.2457	114.247	3.03443
1284	22.2457	114.247	2.86083
1285	22.2457	114.247	2.90773
1286	22.2457	114.247	3.08353
1287	22.2457	114.247	2.89653
1288	22.2457	114.247	3.00933
1289	22.2457	114.247	2.84113
1290	22.2457	114.247	3.01503
1291	22.2457	114.247	3.04503
1292	22.2457	114.247	2.84503
1293	22.2457	114.247	2.84823
1294	22.2457	114.247	2.85173
1295	22.2457	114.247	2.86993
1296	22.2457	114.247	3.16183
1297	22.2457	114.247	2.84693
1298	22.2457	114.247	2.94653
1299	22.2457	114.247	3.02123
1300	22.2457	114.247	2.86843
1301	22.2457	114.247	2.86083
1302	22.2457	114.247	2.87303
1303	22.2457	114.247	2.84023
1304	22.2457	114.247	2.95743
1305	22.2457	114.247	2.94793
1306	22.2457	114.247	2.85143
1307	22.2457	114.247	3.00673
1308	22.2457	114.247	2.91683
1309	22.2457	114.247	2.92893
1310	22.2457	114.247	2.93093
1311	22.2457	114.247	3.04993
1312	22.2457	114.247	3.00053
1313	22.2457	114.247	3.04253
1314	22.2457	114.247	2.91843
1315	22.2457	114.247	2.98893
1316	22.2457	114.247	2.91173
1317	22.2457	114.247	3.03583
1318	22.2457	114.247	2.98563
1319	22.2457	114.247	3.06563
1320	22.2457	114.247	3.05113
1321	22.2457	114.247	3.08243
1322	22.2457	114.247	2.94953
1323	22.2457	114.247	3.01893
1324	22.2457	114.247	2.84333
1325	22.2457	114.247	3.01933
1326	22.2457	114.247	2.89083
1327	22.2457	114.247	3.05723
1328	22.2457	114.247	3.02033
1329	22.2457	114.247	3.14233
1330	22.2457	114.247	2.86353
1331	22.2457	114.247	2.83623
1332	22.2457	114.247	3.08733
1333	22.2457	114.247	2.92283
1334	22.2457	114.247	2.86073
1335	22.2457	114.247	2.94303
1336	22.2457	114.247	3.03313
1337	22.2457	114.247	2.96813
1338	22.2457	114.247	2.96423
1339	22.2457	114.247	2.94753
1340	22.2457	114.247	2.84973
1341	22.2457	114.247	2.93883
1342	22.2457	114.247	3.08093
1343	22.2457	114.247	2.97483
1344	22.2457	114.247	2.99563
1345	22.2457	114.247	2.84433
1346	22.2457	114.247	2.93003
1347	22.2457	114.247	2.97673
1348	22.2457	114.247	2.94603
1349	22.2457	114.247	2.92673
1350	22.2457	114.247	2.84073
1351	22.2457	114.247	2.88853
1352	22.2457	114.247	3.04533
1353	22.2457	114.247	2.86603
1354	22.2457	114.247	3.06683
1355	22.2457	114.247	2.90033
1356	22.2457	114.247	2.84663
1357	22.2457	114.247	2.97973
1358	22.2457	114.247	3.00473
1359	22.2457	114.247	2.86673
1360	22.2457	114.247	3.04043
1361	22.2457	114.247	3.01823
1362	22.2457	114.247	2.96853
1363	22.2457	114.247	2.84363
1364	22.2457	114.247	2.86893
1365	22.2457	114.247	3.00813
1366	22.2457	114.247	2.84773
1367	22.2457	114.247	2.96213
1368	22.2457	114.247	2.96183
1369	22.2457	114.247	2.91263
1370	22.2457	114.247	2.88533
1371	22.2457	114.247	2.90053
1372	22.2457	114.247	3.09113
1373	22.2457	114.247	2.98843
1374	22.2457	114.247	2.82843
1375	22.2457	114.247	2.88683
1376	22.2457	114.247	2.92333
1377	22.2457	114.247	2.86143
1378	22.2457	114.247	2.91453
1379	22.2457	114.247	3.07803
1380	22.2457	114.247	2.92623
1381	22.2457	114.247	2.95923
1382	22.2457	114.247	2.99753
1383	22.2457	114.247	2.99013
1384	22.2457	114.247	2.83923
1385	22.2457	114.247	3.01643
1386	22.2457	114.247	2.85933
1387	22.2457	114.247	3.00453
1388	22.2457	114.247	2.92803
1389	22.2457	114.247	3.02203
1390	22.2457	114.247	2.89153
1391	22.2457	114.247	2.98633
1392	22.2457	114.247	3.12503
1393	22.2457	114.247	2.94153
1394	22.2457	114.247	2.95673
1395	22.2457	114.247	2.84633
1396	22.2457	114.247	3.05213
1397	22.2457	114.247	2.95603
1398	22.2457	114.247	2.92733
1399	22.2457	114.247	3.04753
1400	22.2457	114.247	2.93403
1401	22.2457	114.247	2.87753
1402	22.2457	114.247	3.02413
1403	22.2457	114.247	2.93013
1404	22.2457	114.247	2.98793
1405	22.2457	114.247	2.92263
1406	22.2457	114.247	2.93123
1407	22.2457	114.247	3.01063
1408	22.2457	114.247	2.98883
1409	22.2457	114.247	2.90163
1410	22.2457	114.247	2.87553
1411	22.2457	114.247	2.90703
1412	22.2457	114.247	3.01653
1413	22.2457	114.247	2.84983
1414	22.2457	114.247	2.94703
1415	22.2457	114.247	3.00533
1416	22.2457	114.247	3.06213
1417	22.2457	114.247	2.92333
1418	22.2457	114.247	2.86993
1419	22.2457	114.247	2.92413
1420	22.2457	114.247	3.00953
1421	22.2457	114.247	3.04433
1422	22.2457	114.247	2.90543
1423	22.2457	114.247	2.90743
1424	22.2457	114.247	2.90373
1425	22.2457	114.247	3.01543
1426	22.2457	114.247	2.87273
1427	22.2457	114.247	2.84583
1428	22.2457	114.247	2.89423
1429	22.2457	114.247	2.98073
1430	22.2457	114.247	3.00693
1431	22.2457	114.247	3.04203
1432	22.2457	114.247	2.86063
1433	22.2457	114.247	3.06053
1434	22.2457	114.247	2.83933
1435	22.2457	114.247	2.96603
1436	22.2457	114.247	2.92803
1437	22.2457	114.247	3.01043
1438	22.2457	114.247	3.00883
1439	22.2457	114.247	3.01253
1440	22.2457	114.247	3.02583
1441	22.2457	114.247	3.00063
1442	22.2457	114.247	2.91213
1443	22.2457	114.247	2.87263
1444	22.2457	114.247	3.05693
1445	22.2457	114.247	3.00553
1446	22.2457	114.247	3.02093
1447	22.2457	114.247	3.00363
1448	22.2457	114.247	2.97983
1449	22.2457	114.247	3.13863
1450	22.2457	114.247	2.86363
1451	22.2457	114.247	2.95503
1452	22.2457	114.247	3.01583
1453	22.2457	114.247	2.85173
1454	22.2457	114.247	3.00873
1455	22.2457	114.247	3.05633
1456	22.2457	114.247	3.03713
1457	22.2457	114.247	2.85183
1458	22.2457	114.247	2.91983
1459	22.2457	114.247	3.01113
1460	22.2457	114.247	2.86593
1461	22.2457	114.247	2.95633
1462	22.2457	114.247	2.89113
1463	22.2457	114.247	2.99913
1464	22.2457	114.247	2.98803
1465	22.2457	114.247	3.02573
1466	22.2457	114.247	2.99413
1467	22.2457	114.247	2.96803
1468	22.2457	114.247	2.88183
1469	22.2457	114.247	3.02443
1470	22.2457	114.247	2.97973
1471	22.2457	114.247	2.94943
1472	22.2457	114.247	2.98993
1473	22.2457	114.247	3.04603
1474	22.2457	114.247	2.85803
1475	22.2457	114.247	2.94893
1476	22.2457	114.247	2.91173
1477	22.2457	114.247	2.95993
1478	22.2457	114.247	2.95073
1479	22.2457	114.247	3.00373
1480	22.2457	114.247	2.90043
1481	22.2457	114.247	2.86583
1482	22.2457	114.247	3.00353
1483	22.2457	114.247	2.85903
1484	22.2457	114.247	2.91433
1485	22.2457	114.247	2.86513
1486	22.2457	114.247	2.92973
1487	22.2457	114.247	3.02623
1488	22.2457	114.247	3.03263
1489	22.2457	114.247	2.98673
1490	22.2457	114.247	2.98953
1491	22.2457	114.247	2.87003
1492	22.2457	114.247	2.94343
1493	22.2457	114.247	3.02423
1494	22.2457	114.247	3.00433
1495	22.2457	114.247	2.91503
1496	22.2457	114.247	2.84543
1497	22.2457	114.247	2.96733
1498	22.2457	114.247	3.03163
1499	22.2457	114.247	3.04963
1500	22.2457	114.247	2.96943
1501	22.2457	114.247	2.96663
1502	22.2457	114.247	3.06973
1503	22.2457	114.247	2.86683
1504	22.2457	114.247	2.98603
1505	22.2457	114.247	3.01033
1506	22.2457	114.247	3.00603
1507	22.2457	114.247	2.99523
1508	22.2457	114.247	2.97413
1509	22.2457	114.247	3.05813
1510	22.2457	114.247	3.05813
1511	22.2457	114.247	2.98503
1512	22.2457	114.247	2.89293
1513	22.2457	114.247	3.01143
1514	22.2457	114.247	2.99123
1515	22.2457	114.247	3.00933
1516	22.2457	114.247	3.04583
1517	22.2457	114.247	2.94683
1518	22.2457	114.247	2.90843
1519	22.2457	114.247	3.01633
1520	22.2457	114.247	2.95563
1521	22.2457	114.247	2.87773
1522	22.2457	114.247	2.99403
1523	22.2457	114.247	2.87943
1524	22.2457	114.247	2.96703
1525	22.2457	114.247	2.91843
1526	22.2457	114.247	2.96093
1527	22.2457	114.247	3.03323
1528	22.2457	114.247	3.00823
1529	22.2457	114.247	2.91293
1530	22.2457	114.247	2.98393
1531	22.2457	114.247	2.96383
1532	22.2457	114.247	2.88953
1533	22.2457	114.247	2.83593
1534	22.2457	114.247	2.94213
1535	22.2457	114.247	2.94683
1536	22.2457	114.247	2.92233
1537	22.2457	114.247	3.13743
1538	22.2457	114.247	3.02573
1539	22.2457	114.247	3.02773
1540	22.2457	114.247	2.96513
1541	22.2457	114.247	2.89013
1542	22.2457	114.247	2.92383
1543	22.2457	114.247	3.07523
1544	22.2457	114.247	3.00003
1545	22.2457	114.247	2.88443
1546	22.2457	114.247	2.91373
1547	22.2457	114.247	2.91413
1548	22.2457	114.247	3.02723
1549	22.2457	114.247	2.92993
1550	22.2457	114.247	2.89793
1551	22.2457	114.247	2.96503
1552	22.2457	114.247	2.97513
1553	22.2457	114.247	2.88683
1554	22.2457	114.247	2.90563
1555	22.2457	114.247	3.17143
1556	22.2457	114.247	2.85973
1557	22.2457	114.247	2.97673
1558	22.2457	114.247	2.97063
1559	22.2457	114.247	3.03223
1560	22.2457	114.247	2.98913
1561	22.2457	114.247	2.86133
1562	22.2457	114.247	3.01093
1563	22.2457	114.247	3.03583
1564	22.2457	114.247	2.88133
1565	22.2457	114.247	3.00013
1566	22.2457	114.247	3.03743
1567	22.2457	114.247	3.00463
1568	22.2457	114.247	2.98213
1569	22.2457	114.247	2.89913
1570	22.2457	114.247	2.91733
1571	22.2457	114.247	3.06733
1572	22.2457	114.247	2.97423
1573	22.2457	114.247	3.00113
1574	22.2457	114.247	2.97103
1575	22.2457	114.247	2.84543
1576	22.2457	114.247	3.03593
1577	22.2457	114.247	3.05623
1578	22.2457	114.247	3.06753
1579	22.2457	114.247	3.01883
1580	22.2457	114.247	3.05393
1581	22.2457	114.247	2.98933
1582	22.2457	114.247	3.16183
1583	22.2457	114.247	2.96293
1584	22.2457	114.247	3.04653
1585	22.2457	114.247	2.92713
1586	22.2457	114.247	3.04433
1587	22.2457	114.247	2.88933
1588	22.2457	114.247	3.06323
1589	22.2457	114.247	3.00433
1590	22.2457	114.247	3.06003
1591	22.2457	114.247	2.90823
1592	22.2457	114.247	3.05113
1593	22.2457	114.247	2.99183
1594	22.2457	114.247	2.98913
1595	22.2457	114.247	3.10813
1596	22.2457	114.247	2.89213
1597	22.2457	114.247	2.91433
1598	22.2457	114.247	2.94673
1599	22.2457	114.247	2.94363
1600	22.2457	114.247	3.00453
1601	22.2457	114.247	2.88773
1602	22.2457	114.247	2.85903
1603	22.2457	114.247	2.92063
1604	22.2457	114.247	2.97713
1605	22.2457	114.247	2.89613
1606	22.2457	114.247	2.84833
1607	22.2457	114.247	2.88313
1608	22.2457	114.247	3.13673
1609	22.2457	114.247	2.90943
1610	22.2457	114.247	3.15523
1611	22.2457	114.247	3.01133
1612	22.2457	114.247	2.91703
1613	22.2457	114.247	3.01033
1614	22.2457	114.247	2.98023
1615	22.2457	114.247	3.07673
1616	22.2457	114.247	2.84513
1617	22.2457	114.247	3.10323
1618	22.2457	114.247	2.91343
1619	22.2457	114.247	2.96933
1620	22.2457	114.247	2.95513
1621	22.2457	114.247	2.88033
1622	22.2457	114.247	2.97133
1623	22.2457	114.247	2.87873
1624	22.2457	114.247	2.96143
1625	22.2457	114.247	3.08413
1626	22.2457	114.247	2.90733
1627	22.2457	114.247	3.11873
1628	22.2457	114.247	2.85533
1629	22.2457	114.247	2.97313
1630	22.2457	114.247	3.02693
1631	22.2457	114.247	2.95733
1632	22.2457	114.247	2.87663
1633	22.2457	114.247	2.88123
1634	22.2457	114.247	2.99453
1635	22.2457	114.247	2.86353
1636	22.2457	114.247	3.09543
1637	22.2457	114.247	3.10793
1638	22.2457	114.247	2.99873
1639	22.2457	114.247	2.94203
1640	22.2457	114.247	2.88373
1641	22.2457	114.247	2.99943
1642	22.2457	114.247	3.00983
1643	22.2457	114.247	2.99743
1644	22.2457	114.247	3.04123
1645	22.2457	114.247	3.06933
1646	22.2457	114.247	2.98883
1647	22.2457	114.247	3.12943
1648	22.2457	114.247	2.96433
1649	22.2457	114.247	2.97063
1650	22.2457	114.247	2.92443
1651	22.2457	114.247	3.03983
1652	22.2457	114.247	2.84813
1653	22.2457	114.247	2.88983
1654	22.2457	114.247	3.04423
1655	22.2457	114.247	2.86073
1656	22.2457	114.247	2.86213
1657	22.2457	114.247	2.97643
1658	22.2457	114.247	2.97743
1659	22.2457	114.247	2.86193
1660	22.2457	114.247	3.00063
1661	22.2457	114.247	2.99393
1662	22.2457	114.247	2.96203
1663	22.2457	114.247	2.89553
1664	22.2457	114.247	3.04943
1665	22.2457	114.247	2.86523
1666	22.2457	114.247	3.12393
1667	22.2457	114.247	3.02113
1668	22.2457	114.247	3.06583
1669	22.2457	114.247	2.90893
1670	22.2457	114.247	2.95473
1671	22.2457	114.247	2.84983
1672	22.2457	114.247	3.04063
1673	22.2457	114.247	3.04893
1674	22.2457	114.247	3.04143
1675	22.2457	114.247	2.97753
1676	22.2457	114.247	3.04243
1677	22.2457	114.247	3.06683
1678	22.2457	114.247	3.00233
1679	22.2457	114.247	2.99353
1680	22.2457	114.247	3.03763
1681	22.2457	114.247	2.99043
1682	22.2457	114.247	2.88183
1683	22.2457	114.247	2.86563
1684	22.2457	114.247	2.92183
1685	22.2457	114.247	3.15833
1686	22.2457	114.247	3.00333
1687	22.2457	114.247	2.96123
1688	22.2457	114.247	2.93353
1689	22.2457	114.247	2.97313
1690	22.2457	114.247	3.04023
1691	22.2457	114.247	2.92513
1692	22.2457	114.247	2.99323
1693	22.2457	114.247	2.89223
1694	22.2457	114.247	3.05183
1695	22.2457	114.247	3.01923
1696	22.2457	114.247	2.98233
1697	22.2457	114.247	2.97503
1698	22.2457	114.247	3.01563
1699	22.2457	114.247	2.97813
1700	22.2457	114.247	2.92613
1701	22.2457	114.247	2.89983
1702	22.2457	114.247	2.95343
1703	22.2457	114.247	2.86643
1704	22.2457	114.247	2.98143
1705	22.2457	114.247	2.84563
1706	22.2457	114.247	2.90093
1707	22.2457	114.247	2.94233
1708	22.2457	114.247	2.89703
1709	22.2457	114.247	3.01583
1710	22.2457	114.247	2.85863
1711	22.2457	114.247	2.87473
1712	22.2457	114.247	2.87033
1713	22.2457	114.247	2.83573
1714	22.2457	114.247	2.85263
1715	22.2457	114.247	2.86113
1716	22.2457	114.247	2.95703
1717	22.2457	114.247	3.01073
1718	22.2457	114.247	3.02453
1719	22.2457	114.247	2.87653
1720	22.2457	114.247	2.84273
1721	22.2457	114.247	2.99463
1722	22.2457	114.247	2.97313
1723	22.2457	114.247	3.01813
1724	22.2457	114.247	2.97133
1725	22.2457	114.247	3.16393
1726	22.2457	114.247	2.84743
1727	22.2457	114.247	2.90033
1728	22.2457	114.247	3.02303
1729	22.2457	114.247	3.01533
1730	22.2457	114.247	2.90563
1731	22.2457	114.247	3.00433
1732	22.2457	114.247	2.95123
1733	22.2457	114.247	2.87633
1734	22.2457	114.247	3.05353
1735	22.2457	114.247	2.93893
1736	22.2457	114.247	3.05653
1737	22.2457	114.247	2.96923
1738	22.2457	114.247	2.97303
1739	22.2457	114.247	2.99973
1740	22.2457	114.247	2.98083
1741	22.2457	114.247	2.95943
1742	22.2457	114.247	2.86943
1743	22.2457	114.247	2.83973
1744	22.2457	114.247	2.93713
1745	22.2457	114.247	2.96773
1746	22.2457	114.247	2.94143
1747	22.2457	114.247	2.94083
1748	22.2457	114.247	3.05463
1749	22.2457	114.247	3.09873
1750	22.2457	114.247	3.02843
1751	22.2457	114.247	2.96173
1752	22.2457	114.247	3.07203
1753	22.2457	114.247	3.04283
1754	22.2457	114.247	3.07923
1755	22.2457	114.247	2.99933
1756	22.2457	114.247	2.96983
1757	22.2457	114.247	2.87203
1758	22.2457	114.247	2.85033
1759	22.2457	114.247	2.94253
1760	22.2457	114.247	3.16033
1761	22.2457	114.247	2.85313
1762	22.2457	114.247	3.17033
1763	22.2457	114.247	2.97473
1764	22.2457	114.247	2.94493
1765	22.2457	114.247	3.07493
1766	22.2457	114.247	2.91543
1767	22.2457	114.247	3.02313
1768	22.2457	114.247	2.91983
1769	22.2457	114.247	2.95703
1770	22.2457	114.247	3.07513
1771	22.2457	114.247	3.07473
1772	22.2457	114.247	3.01673
1773	22.2457	114.247	3.04233
1774	22.2457	114.247	2.92823
1775	22.2457	114.247	2.86873
1776	22.2457	114.247	2.83213
1777	22.2457	114.247	2.89603
1778	22.2457	114.247	2.91263
1779	22.2457	114.247	2.99533
1780	22.2457	114.247	2.84613
1781	22.2457	114.247	2.99073
1782	22.2457	114.247	2.87883
1783	22.2457	114.247	3.04953
1784	22.2457	114.247	2.84313
1785	22.2457	114.247	2.98623
1786	22.2457	114.247	2.94423
1787	22.2457	114.247	3.05363
1788	22.2457	114.247	2.94883
1789	22.2457	114.247	2.93673
1790	22.2457	114.247	2.93703
1791	22.2457	114.247	3.00343
1792	22.2457	114.247	2.89363
1793	22.2457	114.247	2.98653
1794	22.2457	114.247	2.93453
1795	22.2457	114.247	2.92843
1796	22.2457	114.247	3.02383
1797	22.2457	114.247	3.04343
1798	22.2457	114.247	3.14573
1799	22.2457	114.247	3.01323
1800	22.2457	114.247	3.16143
1801	22.2457	114.247	3.15303
1802	22.2457	114.247	3.00843
1803	22.2457	114.247	2.99613
1804	22.2457	114.247	2.88023
1805	22.2457	114.247	2.96743
1806	22.2457	114.247	3.02323
1807	22.2457	114.247	2.95093
1808	22.2457	114.247	2.98783
1809	22.2457	114.247	2.84283
1810	22.2457	114.247	2.94393
1811	22.2457	114.247	2.95253
1812	22.2457	114.247	2.96753
1813	22.2457	114.247	2.85643
1814	22.2457	114.247	2.93033
1815	22.2457	114.247	3.05033
1816	22.2457	114.247	3.16613
1817	22.2457	114.247	3.04473
1818	22.2457	114.247	3.00643
1819	22.2457	114.247	2.96653
1820	22.2457	114.247	2.85583
1821	22.2457	114.247	3.07463
1822	22.2457	114.247	2.88153
1823	22.2457	114.247	2.90993
1824	22.2457	114.247	2.92433
1825	22.2457	114.247	2.98003
1826	22.2457	114.247	3.02513
1827	22.2457	114.247	2.91093
1828	22.2457	114.247	2.98643
1829	22.2457	114.247	2.86223
1830	22.2457	114.247	3.05493
1831	22.2457	114.247	2.94443
1832	22.2457	114.247	2.85133
1833	22.2457	114.247	2.85073
1834	22.2457	114.247	2.88293
1835	22.2457	114.247	2.91483
1836	22.2457	114.247	2.85283
1837	22.2457	114.247	3.02243
1838	22.2457	114.247	2.99953
1839	22.2457	114.247	2.89073
1840	22.2457	114.247	3.06133
1841	22.2457	114.247	2.93733
1842	22.2457	114.247	2.95853
1843	22.2457	114.247	2.93383
1844	22.2457	114.247	3.11293
1845	22.2457	114.247	2.85673
1846	22.2457	114.247	2.87293
1847	22.2457	114.247	2.91633
1848	22.2457	114.247	2.96473
1849	22.2457	114.247	2.96243
1850	22.2457	114.247	2.96273
1851	22.2457	114.247	2.91443
1852	22.2457	114.247	2.90433
1853	22.2457	114.247	2.99893
1854	22.2457	114.247	2.89333
1855	22.2457	114.247	2.93623
1856	22.2457	114.247	2.99093
1857	22.2457	114.247	2.85503
1858	22.2457	114.247	2.91103
1859	22.2457	114.247	2.85463
1860	22.2457	114.247	2.84423
1861	22.2457	114.247	2.95133
1862	22.2457	114.247	2.94343
1863	22.2457	114.247	3.03383
1864	22.2457	114.247	2.89433
1865	22.2457	114.247	2.91733
1866	22.2457	114.247	3.16333
1867	22.2457	114.247	3.02893
1868	22.2457	114.247	2.98853
1869	22.2457	114.247	2.82743
1870	22.2457	114.247	3.00613
1871	22.2457	114.247	2.93783
1872	22.2457	114.247	2.85833
1873	22.2457	114.247	2.96313
1874	22.2457	114.247	2.84803
1875	22.2457	114.247	3.03973
1876	22.2457	114.247	3.10643
1877	22.2457	114.247	2.96063
1878	22.2457	114.247	2.94373
1879	22.2457	114.247	2.87983
1880	22.2457	114.247	3.02853
1881	22.2457	114.247	2.96463
1882	22.2457	114.247	2.86063
1883	22.2457	114.247	3.00883
1884	22.2457	114.247	3.10333
1885	22.2457	114.247	2.85113
1886	22.2457	114.247	3.01833
1887	22.2457	114.247	2.95933
1888	22.2457	114.247	2.94253
1889	22.2457	114.247	2.92353
1890	22.2457	114.247	2.92253
1891	22.2457	114.247	2.86763
1892	22.2457	114.247	2.92463
1893	22.2457	114.247	2.92443
1894	22.2457	114.247	2.91503
1895	22.2457	114.247	3.02843
1896	22.2457	114.247	2.93313
1897	22.2457	114.247	2.93033
1898	22.2457	114.247	3.06693
1899	22.2457	114.247	2.99563
1900	22.2457	114.247	2.91953
1901	22.2457	114.247	3.04273
1902	22.2457	114.247	2.97193
1903	22.2457	114.247	2.84953
1904	22.2457	114.247	2.94943
1905	22.2457	114.247	3.13163
1906	22.2457	114.247	2.99403
1907	22.2457	114.247	2.89573
1908	22.2457	114.247	3.09493
1909	22.2457	114.247	3.05373
1910	22.2457	114.247	2.95843
1911	22.2457	114.247	2.91863
1912	22.2457	114.247	2.85783
1913	22.2457	114.247	2.88423
1914	22.2457	114.247	2.92463
1915	22.2457	114.247	2.93373
1916	22.2457	114.247	2.96083
1917	22.2457	114.247	3.00463
1918	22.2457	114.247	2.92543
1919	22.2457	114.247	2.84663
1920	22.2457	114.247	2.82803
1921	22.2457	114.247	2.86103
1922	22.2457	114.247	2.96963
1923	22.2457	114.247	2.89343
1924	22.2457	114.247	2.98953
1925	22.2457	114.247	2.92383
1926	22.2457	114.247	2.93753
1927	22.2457	114.247	3.09653
1928	22.2457	114.247	3.06873
1929	22.2457	114.247	2.98923
1930	22.2457	114.247	2.96223
1931	22.2457	114.247	2.89433
1932	22.2457	114.247	2.96993
1933	22.2457	114.247	2.95783
1934	22.2457	114.247	2.92103
1935	22.2457	114.247	2.92843
1936	22.2457	114.247	2.86613
1937	22.2457	114.247	2.93203
1938	22.2457	114.247	3.01203
1939	22.2457	114.247	2.95713
1940	22.2457	114.247	2.92573
1941	22.2457	114.247	3.01223
1942	22.2457	114.247	2.86963
1943	22.2457	114.247	2.85303
1944	22.2457	114.247	3.05863
1945	22.2457	114.247	3.10723
1946	22.2457	114.247	2.84763
1947	22.2457	114.247	3.00593
1948	22.2457	114.247	2.96403
1949	22.2457	114.247	2.93353
1950	22.2457	114.247	2.89583
1951	22.2457	114.247	2.89293
1952	22.2457	114.247	2.93653
1953	22.2457	114.247	3.00743
1954	22.2457	114.247	2.91473
1955	22.2457	114.247	2.92953
1956	22.2457	114.247	2.95213
1957	22.2457	114.247	2.89643
1958	22.2457	114.247	3.01053
1959	22.2457	114.247	3.02593
1960	22.2457	114.247	2.93953
1961	22.2457	114.247	2.96293
1962	22.2457	114.247	3.01123
1963	22.2457	114.247	2.85243
1964	22.2457	114.247	2.88973
1965	22.2457	114.247	2.86853
1966	22.2457	114.247	2.87403
1967	22.2457	114.247	3.00553
1968	22.2457	114.247	2.87493
1969	22.2457	114.247	2.91333
1970	22.2457	114.247	2.84923
1971	22.2457	114.247	3.03343
1972	22.2457	114.247	3.18453
1973	22.2457	114.247	2.84713
1974	22.2457	114.247	2.85973
1975	22.2457	114.247	2.99303
1976	22.2457	114.247	2.99533
1977	22.2457	114.247	2.86233
1978	22.2457	114.247	3.02613
1979	22.2457	114.247	2.92363
1980	22.2457	114.247	2.95603
1981	22.2457	114.247	2.84223
1982	22.2457	114.247	2.99413
1983	22.2457	114.247	2.93513
1984	22.2457	114.247	2.88003
1985	22.2457	114.247	2.85423
1986	22.2457	114.247	2.86843
1987	22.2457	114.247	2.97393
1988	22.2457	114.247	2.88553
1989	22.2457	114.247	2.91193
1990	22.2457	114.247	2.97613
1991	22.2457	114.247	2.86083
1992	22.2457	114.247	2.88423
1993	22.2457	114.247	2.96353
1994	22.2457	114.247	3.05493
1995	22.2457	114.247	2.92273
1996	22.2457	114.247	2.94773
1997	22.2457	114.247	2.87633
1998	22.2457	114.247	2.89953
1999	22.2457	114.247	3.13483
[truncated: 34,023 more rows]
